# Supplementary material
Source: PubMed Central journal article supplement (PMC6345169)
Supplement: NIHMS999962-supplement-a.pdf [file NIHMS999962-supplement-a.pdf]

**X-Ray data for (S,S)-6ai.** Crystal data and structure refinement.

|                                   |                                                                                                   |
|-----------------------------------|---------------------------------------------------------------------------------------------------|
| Identification code               | CCDC 1866767                                                                                      |
| Empirical formula                 | C <sub>30</sub> H <sub>37</sub> BO <sub>2</sub> S                                                 |
| Formula weight                    | 472.52                                                                                            |
| Temperature                       | 100 K                                                                                             |
| Wavelength                        | 0.71073 Å                                                                                         |
| Crystal system                    | Orthorhombic                                                                                      |
| Space group                       | P2 <sub>1</sub> 2 <sub>1</sub> 2 <sub>1</sub>                                                     |
| Unit cell dimensions              | a = 9.5200(2) Å      □ = 90°.<br>b = 13.4283(4) Å      □ = 90°.<br>c = 20.6016(6) Å      □ = 90°. |
| Volume                            | 2633.66 (12) Å <sup>3</sup>                                                                       |
| Z                                 | 4                                                                                                 |
| Density (calculated)              | 1.192 Mg/m <sup>3</sup>                                                                           |
| Absorption coefficient            | 0.613 mm <sup>-1</sup>                                                                            |
| F(000)                            | 1016                                                                                              |
| Crystal size                      | 0.51 x 0.37 x 0.26 mm                                                                             |
| Theta range for data collection   | 2.36 to 28.30°.                                                                                   |
| Index ranges                      | -12 ≤ h ≤ 12, -17 ≤ k ≤ 17, -27 ≤ l ≤ 27                                                          |
| Reflections collected             | 49428                                                                                             |
| Independent reflections           | 6522 [R(int) = 0.044]                                                                             |
| Completeness to theta = 28.3°     | 99.8 %                                                                                            |
| Absorption correction             | Integration                                                                                       |
| Max. and min. transmission        | 0.746 and 0.700                                                                                   |
| Refinement method                 | Full-matrix least-squares on F <sup>2</sup>                                                       |
| Data / restraints / parameters    | 6522 / 0 / 314                                                                                    |
| Goodness-of-fit on F <sup>2</sup> | 0.995                                                                                             |
| Final R indices [I > 2σ(I)]       | R1 = 0.0306, wR2 = 0.0733                                                                         |
| Largest diff. peak and hole       | 0.2864 and -0.1977 e.Å <sup>-3</sup>                                                              |

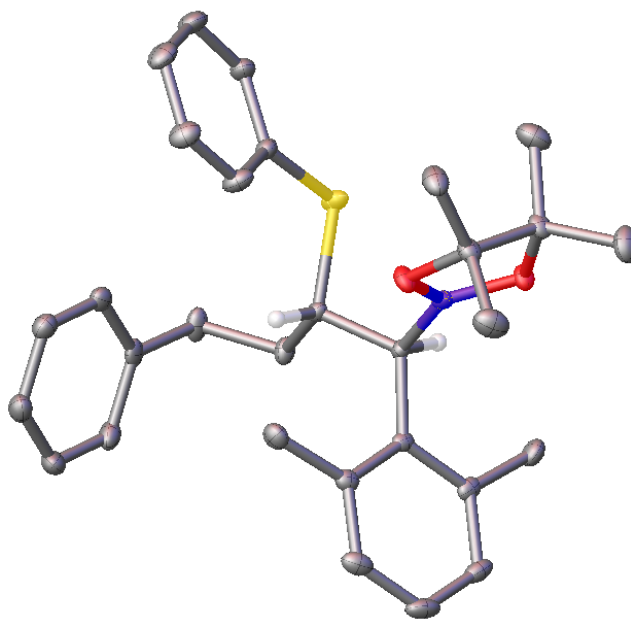

**Figure 1.** X-ray structure of complex (*S,S*)-**6ai**.

The crystals were obtained directly from recrystallization as yellow needles 0.51 x 0.37 x 0.26 mm in size and mounted using oil (Paratone-N, Exxon) to a thin glass fiber with the (1 0 0) scattering planes roughly normal to the spindle axis. Systematic absences for (*S,S*)-**6ai** were consistent with the space group  $P2_12_12_1$ . Unit cell dimensions were  $a = 9.5200(2) \text{ \AA}$ ,  $b = 13.4283(4) \text{ \AA}$ ,  $c = 20.6016(6) \text{ \AA}$ ,  $\alpha = 90^\circ$ ,  $\beta = 90^\circ$ ,  $\gamma = 90^\circ$ . Integration absorption correction was applied and maximum and minimum transmission factors were 0.746 and 0.700. The 6522 data points were used in the full-matrix least-squares refinement. The structure was solved using charge flipping by using SHELXTL software package.<sup>1</sup> Hydrogen atoms were placed in “idealized” positions and their displacement parameters were fixed to be 20-50 % larger than those of the attached non-hydrogen atoms.

**Table 1.** Atomic coordinates ( $\times 10^4$ ) and equivalent isotropic displacement parameters ( $\text{\AA}^2 \times 10^3$ ).  $U(\text{eq})$  is defined as one third of the trace of the orthogonalized  $U^{ij}$  tensor.

*Refinement.* Omit (060), (012), (110), and (014). No restraints nor constraints

*Fractional atomic coordinates and isotropic or equivalent isotropic displacement parameters ( $\text{\AA}^2$ ) for (mo\_DD48M\_0m)*

|      | <i>x</i>     | <i>y</i>     | <i>z</i>      | $U_{\text{iso}}^*/U_{\text{eq}}$ |
|------|--------------|--------------|---------------|----------------------------------|
| S1   | 0.37901 (4)  | 0.65733 (2)  | 0.510290 (15) | 0.01819 (8)                      |
| O1   | 0.23720 (9)  | 0.50566 (7)  | 0.63213 (5)   | 0.0178 (2)                       |
| O2   | 0.26085 (9)  | 0.65401 (7)  | 0.68593 (4)   | 0.01567 (18)                     |
| C1   | 0.68061 (15) | 0.25499 (11) | 0.43328 (7)   | 0.0222 (3)                       |
| H1   | 0.67861 (15) | 0.18487 (11) | 0.42727 (7)   | 0.0267 (3)*                      |
| C2   | 0.79399 (15) | 0.29997 (12) | 0.46412 (7)   | 0.0249 (3)                       |
| H2   | 0.87002 (15) | 0.26046 (12) | 0.47923 (7)   | 0.0299 (4)*                      |
| C3   | 0.57054 (15) | 0.31367 (10) | 0.41143 (7)   | 0.0196 (3)                       |
| H3   | 0.49225 (15) | 0.28347 (10) | 0.39069 (7)   | 0.0235 (3)*                      |
| C4   | 0.79636 (14) | 0.40235 (11) | 0.47285 (6)   | 0.0223 (3)                       |
| H4   | 0.87379 (14) | 0.43219 (11) | 0.49448 (6)   | 0.0268 (4)*                      |
| C5   | 0.57389 (14) | 0.41639 (10) | 0.41964 (6)   | 0.0184 (3)                       |
| H5   | 0.49811 (14) | 0.45574 (10) | 0.40407 (6)   | 0.0221 (3)*                      |
| C6   | 0.68678 (14) | 0.46234 (10) | 0.45037 (6)   | 0.0175 (3)                       |
| C7   | 0.69006 (16) | 0.57360 (10) | 0.46128 (6)   | 0.0218 (3)                       |
| H7a  | 0.78459 (16) | 0.59923 (10) | 0.45024 (6)   | 0.0262 (3)*                      |
| H7b  | 0.62146 (16) | 0.60587 (10) | 0.43193 (6)   | 0.0262 (3)*                      |
| C8   | 0.65522 (13) | 0.60158 (10) | 0.53187 (6)   | 0.0166 (3)                       |
| H8a  | 0.72178 (13) | 0.56677 (10) | 0.56099 (6)   | 0.0199 (3)*                      |
| H8b  | 0.67005 (13) | 0.67404 (10) | 0.53747 (6)   | 0.0199 (3)*                      |
| C9   | 0.50543 (13) | 0.57613 (9)  | 0.55292 (6)   | 0.0126 (2)                       |
| H9   | 0.48508 (13) | 0.50505 (9)  | 0.54191 (6)   | 0.0151 (3)*                      |
| C10  | 0.48308 (12) | 0.59231 (9)  | 0.62662 (6)   | 0.0117 (2)                       |
| H10  | 0.50946 (12) | 0.66330 (9)  | 0.63478 (6)   | 0.0140 (3)*                      |
| C11  | 0.57330 (12) | 0.53103 (10) | 0.67380 (6)   | 0.0128 (2)                       |
| C12  | 0.58838 (12) | 0.42669 (10) | 0.66956 (6)   | 0.0151 (2)                       |
| C13  | 0.63367 (13) | 0.58072 (10) | 0.72772 (6)   | 0.0155 (2)                       |
| C14  | 0.52427 (14) | 0.36410 (9)  | 0.61617 (7)   | 0.0189 (3)                       |
| H14a | 0.5774 (7)   | 0.3738 (6)   | 0.57592 (14)  | 0.0283 (4)*                      |
| H14b | 0.5275 (10)  | 0.29369 (12) | 0.6286 (2)    | 0.0283 (4)*                      |
| H14c | 0.4264 (4)   | 0.3843 (5)   | 0.6094 (3)    | 0.0283 (4)*                      |
| C15  | 0.62111 (16) | 0.69221 (10) | 0.73714 (6)   | 0.0209 (3)                       |
| H15a | 0.6623 (10)  | 0.71082 (14) | 0.7790 (2)    | 0.0313 (4)*                      |
| H15b | 0.6711 (9)   | 0.72661 (10) | 0.7021 (3)    | 0.0313 (4)*                      |
| H15c | 0.52178 (17) | 0.71134 (15) | 0.7364 (5)    | 0.0313 (4)*                      |
| C16  | 0.66380 (13) | 0.37535 (11) | 0.71756 (7)   | 0.0203 (3)                       |
| H16  | 0.67580 (13) | 0.30536 (11) | 0.71382 (7)   | 0.0243 (3)*                      |
| C17  | 0.70548 (13) | 0.52689 (11) | 0.77508 (6)   | 0.0201 (3)                       |
| H17  | 0.74440 (13) | 0.56092 (11) | 0.81129 (6)   | 0.0241 (3)*                      |
| C18  | 0.72103 (14) | 0.42472 (12) | 0.77025 (7)   | 0.0231 (3)                       |
| H18  | 0.77048 (14) | 0.38884 (12) | 0.80276 (7)   | 0.0277 (3)*                      |
| C19  | 0.27465 (13) | 0.57724 (10) | 0.46143 (6)   | 0.0157 (2)                       |
| C20  | 0.24599 (14) | 0.47803 (11) | 0.47566 (7)   | 0.0210 (3)                       |
| H20  | 0.28421 (14) | 0.44860 (11) | 0.51369 (7)   | 0.0253 (3)*                      |
| C21  | 0.21368 (15) | 0.61993 (10) | 0.40629 (6)   | 0.0196 (3)                       |

|      |               |              |              |             |
|------|---------------|--------------|--------------|-------------|
| H21  | 0.23336 (15)  | 0.68733 (10) | 0.39561 (6)  | 0.0236 (3)* |
| C22  | 0.16154 (15)  | 0.42156 (11) | 0.43446 (7)  | 0.0233 (3)  |
| H22  | 0.14605 (15)  | 0.35308 (11) | 0.44354 (7)  | 0.0279 (3)* |
| C23  | 0.12431 (16)  | 0.56429 (11) | 0.36693 (6)  | 0.0243 (3)  |
| H23  | 0.07980 (16)  | 0.59474 (11) | 0.33074 (6)  | 0.0292 (3)* |
| C24  | 0.10009 (15)  | 0.46452 (12) | 0.38041 (7)  | 0.0246 (3)  |
| H24  | 0.04170 (15)  | 0.42596 (12) | 0.35272 (7)  | 0.0295 (4)* |
| C25  | 0.10955 (13)  | 0.51575 (10) | 0.67193 (6)  | 0.0173 (2)  |
| C26  | -0.01545 (14) | 0.48278 (11) | 0.63209 (7)  | 0.0239 (3)  |
| H26a | -0.0159 (7)   | 0.5186 (6)   | 0.5906 (2)   | 0.0359 (4)* |
| H26b | -0.0092 (6)   | 0.41101 (19) | 0.6240 (5)   | 0.0359 (4)* |
| H26c | -0.10220 (15) | 0.4974 (8)   | 0.6559 (2)   | 0.0359 (4)* |
| C27  | 0.12852 (17)  | 0.44748 (11) | 0.73029 (8)  | 0.0283 (3)  |
| H27a | 0.1454 (13)   | 0.3793 (2)   | 0.71530 (8)  | 0.0425 (5)* |
| H27b | 0.2089 (8)    | 0.4702 (6)   | 0.7561 (3)   | 0.0425 (5)* |
| H27c | 0.0435 (5)    | 0.4491 (7)   | 0.7571 (3)   | 0.0425 (5)* |
| C28  | 0.11140 (13)  | 0.62884 (9)  | 0.68967 (6)  | 0.0164 (2)  |
| C29  | 0.03659 (16)  | 0.69350 (11) | 0.63938 (8)  | 0.0271 (3)  |
| H29a | 0.0534 (10)   | 0.76393 (11) | 0.6491 (3)   | 0.0406 (5)* |
| H29b | 0.0729 (9)    | 0.6780 (6)   | 0.59602 (10) | 0.0406 (5)* |
| H29c | -0.0645 (2)   | 0.6800 (6)   | 0.6407 (4)   | 0.0406 (5)* |
| C30  | 0.05973 (16)  | 0.65390 (13) | 0.75723 (7)  | 0.0283 (3)  |
| H30a | 0.1188 (8)    | 0.6203 (7)   | 0.78943 (7)  | 0.0424 (5)* |
| H30b | 0.0646 (12)   | 0.72607 (15) | 0.7639 (2)   | 0.0424 (5)* |
| H30c | -0.0377 (4)   | 0.6316 (8)   | 0.7621 (2)   | 0.0424 (5)* |
| B1   | 0.32321 (15)  | 0.58392 (11) | 0.64725 (7)  | 0.0136 (3)  |

*Atomic displacement parameters ( $\text{\AA}^2$ ) for (mo\_DD48M\_0m)*

|     | $U^{11}$     | $U^{22}$     | $U^{33}$     | $U^{12}$      | $U^{13}$      | $U^{23}$     |
|-----|--------------|--------------|--------------|---------------|---------------|--------------|
| S1  | 0.02331 (15) | 0.01365 (14) | 0.01761 (14) | -0.00035 (12) | -0.00727 (12) | 0.00146 (11) |
| O1  | 0.0105 (4)   | 0.0188 (5)   | 0.0242 (5)   | -0.0003 (3)   | 0.0029 (4)    | -0.0052 (4)  |
| O2  | 0.0108 (4)   | 0.0171 (4)   | 0.0191 (4)   | -0.0016 (4)   | 0.0028 (3)    | -0.0042 (4)  |
| C1  | 0.0269 (7)   | 0.0200 (7)   | 0.0198 (6)   | 0.0034 (5)    | 0.0012 (6)    | -0.0025 (5)  |
| C2  | 0.0218 (7)   | 0.0299 (7)   | 0.0231 (7)   | 0.0105 (6)    | -0.0033 (6)   | -0.0061 (6)  |
| C3  | 0.0199 (6)   | 0.0234 (7)   | 0.0155 (6)   | -0.0015 (5)   | 0.0001 (5)    | -0.0004 (5)  |
| C4  | 0.0172 (6)   | 0.0312 (8)   | 0.0186 (6)   | -0.0005 (5)   | 0.0016 (5)    | -0.0087 (5)  |
| C5  | 0.0194 (6)   | 0.0227 (7)   | 0.0131 (6)   | 0.0031 (5)    | 0.0025 (5)    | 0.0012 (5)   |
| C6  | 0.0217 (6)   | 0.0200 (7)   | 0.0109 (5)   | -0.0007 (5)   | 0.0069 (5)    | -0.0017 (5)  |
| C7  | 0.0298 (7)   | 0.0196 (7)   | 0.0161 (6)   | -0.0054 (6)   | 0.0092 (5)    | -0.0018 (5)  |
| C8  | 0.0171 (6)   | 0.0178 (6)   | 0.0148 (6)   | -0.0039 (5)   | 0.0038 (5)    | -0.0031 (5)  |
| C9  | 0.0140 (5)   | 0.0124 (6)   | 0.0113 (5)   | 0.0000 (4)    | -0.0007 (4)   | 0.0003 (4)   |
| C10 | 0.0117 (5)   | 0.0126 (5)   | 0.0108 (5)   | -0.0003 (4)   | -0.0008 (4)   | -0.0011 (4)  |
| C11 | 0.0082 (5)   | 0.0186 (6)   | 0.0117 (5)   | -0.0003 (4)   | 0.0016 (4)    | 0.0019 (5)   |
| C12 | 0.0113 (5)   | 0.0178 (6)   | 0.0162 (6)   | -0.0002 (4)   | 0.0025 (4)    | 0.0028 (5)   |
| C13 | 0.0108 (5)   | 0.0239 (6)   | 0.0117 (5)   | -0.0028 (5)   | 0.0028 (4)    | 0.0012 (5)   |
| C14 | 0.0207 (6)   | 0.0129 (6)   | 0.0230 (6)   | 0.0008 (5)    | 0.0008 (5)    | 0.0004 (5)   |
| C15 | 0.0214 (6)   | 0.0257 (7)   | 0.0156 (6)   | -0.0025 (6)   | -0.0027 (5)   | -0.0056 (5)  |
| C16 | 0.0147 (6)   | 0.0206 (7)   | 0.0254 (7)   | 0.0006 (5)    | 0.0025 (5)    | 0.0090 (5)   |
| C17 | 0.0134 (6)   | 0.0343 (8)   | 0.0126 (6)   | -0.0043 (5)   | -0.0013 (5)   | 0.0032 (5)   |
| C18 | 0.0144 (6)   | 0.0345 (8)   | 0.0204 (6)   | 0.0011 (6)    | -0.0013 (5)   | 0.0131 (6)   |
| C19 | 0.0141 (5)   | 0.0196 (6)   | 0.0133 (5)   | 0.0003 (5)    | -0.0017 (5)   | -0.0021 (5)  |
| C20 | 0.0211 (6)   | 0.0236 (7)   | 0.0184 (6)   | -0.0056 (5)   | -0.0069 (5)   | 0.0038 (5)   |

|     |            |            |            |             |             |             |
|-----|------------|------------|------------|-------------|-------------|-------------|
| C21 | 0.0218 (6) | 0.0207 (6) | 0.0163 (6) | 0.0035 (5)  | -0.0024 (5) | 0.0011 (5)  |
| C22 | 0.0223 (7) | 0.0236 (7) | 0.0238 (7) | -0.0073 (5) | -0.0057 (5) | 0.0023 (6)  |
| C23 | 0.0245 (7) | 0.0323 (8) | 0.0162 (6) | 0.0021 (6)  | -0.0067 (6) | 0.0021 (5)  |
| C24 | 0.0200 (7) | 0.0346 (8) | 0.0192 (6) | -0.0056 (6) | -0.0057 (5) | -0.0030 (6) |
| C25 | 0.0122 (5) | 0.0184 (6) | 0.0213 (6) | 0.0000 (5)  | 0.0023 (5)  | -0.0015 (5) |

|     |            |            |            |             |             |             |
|-----|------------|------------|------------|-------------|-------------|-------------|
| C26 | 0.0137 (6) | 0.0262 (7) | 0.0319 (8) | -0.0025 (5) | 0.0006 (5)  | -0.0090 (6) |
| C27 | 0.0247 (7) | 0.0276 (7) | 0.0327 (8) | 0.0005 (6)  | 0.0035 (6)  | 0.0108 (6)  |
| C28 | 0.0100 (5) | 0.0181 (6) | 0.0212 (6) | -0.0010 (5) | 0.0033 (5)  | -0.0022 (5) |
| C29 | 0.0209 (7) | 0.0227 (7) | 0.0376 (8) | 0.0038 (6)  | 0.0001 (6)  | 0.0057 (6)  |
| C30 | 0.0226 (7) | 0.0332 (8) | 0.0290 (7) | -0.0040 (6) | 0.0092 (6)  | -0.0089 (7) |
| B1  | 0.0131 (6) | 0.0150 (6) | 0.0127 (6) | 0.0010 (5)  | -0.0021 (5) | 0.0014 (5)  |

*Geometric parameters (Å, °) for (mo\_DD48M\_0m)*

|           |             |             |             |
|-----------|-------------|-------------|-------------|
| S1—C9     | 1.8462 (12) | C14—H14c    | 0.9800      |
| S1—C19    | 1.7767 (13) | C15—H15a    | 0.9800      |
| O1—C25    | 1.4722 (15) | C15—H15b    | 0.9800      |
| O1—B1     | 1.3681 (17) | C15—H15c    | 0.9800      |
| O2—C28    | 1.4644 (15) | C16—H16     | 0.9500      |
| O2—B1     | 1.3687 (16) | C16—C18     | 1.384 (2)   |
| C1—H1     | 0.9500      | C17—H17     | 0.9500      |
| C1—C2     | 1.390 (2)   | C17—C18     | 1.384 (2)   |
| C1—C3     | 1.3863 (19) | C18—H18     | 0.9500      |
| C2—H2     | 0.9500      | C19—C20     | 1.3911 (19) |
| C2—C4     | 1.387 (2)   | C19—C21     | 1.3986 (17) |
| C3—H3     | 0.9500      | C20—H20     | 0.9500      |
| C3—C5     | 1.3900 (19) | C20—C22     | 1.3934 (19) |
| C4—H4     | 0.9500      | C21—H21     | 0.9500      |
| C4—C6     | 1.397 (2)   | C21—C23     | 1.3927 (19) |
| C5—H5     | 0.9500      | C22—H22     | 0.9500      |
| C5—C6     | 1.3916 (19) | C22—C24     | 1.384 (2)   |
| C6—C7     | 1.5111 (18) | C23—H23     | 0.9500      |
| C7—H7a    | 0.9900      | C23—C24     | 1.388 (2)   |
| C7—H7b    | 0.9900      | C24—H24     | 0.9500      |
| C7—C8     | 1.5381 (17) | C25—C26     | 1.5120 (18) |
| C8—H8a    | 0.9900      | C25—C27     | 1.5227 (19) |
| C8—H8b    | 0.9900      | C25—C28     | 1.5620 (18) |
| C8—C9     | 1.5291 (16) | C26—H26a    | 0.9800      |
| C9—H9     | 1.0000      | C26—H26b    | 0.9800      |
| C9—C10    | 1.5486 (16) | C26—H26c    | 0.9800      |
| C10—H10   | 1.0000      | C27—H27a    | 0.9800      |
| C10—C11   | 1.5360 (16) | C27—H27b    | 0.9800      |
| C10—B1    | 1.5842 (18) | C27—H27c    | 0.9800      |
| C11—C12   | 1.4111 (17) | C28—C29     | 1.5279 (19) |
| C11—C13   | 1.4176 (17) | C28—C30     | 1.5141 (19) |
| C12—C14   | 1.5128 (18) | C29—H29a    | 0.9800      |
| C12—C16   | 1.4031 (18) | C29—H29b    | 0.9800      |
| C13—C15   | 1.5143 (19) | C29—H29c    | 0.9800      |
| C13—C17   | 1.3935 (18) | C30—H30a    | 0.9800      |
| C14—H14a  | 0.9800      | C30—H30b    | 0.9800      |
| C14—H14b  | 0.9800      | C30—H30c    | 0.9800      |
| C19—S1—C9 | 106.05 (6)  | H16—C16—C12 | 119.37 (8)  |
| B1—O1—C25 | 107.25 (10) | C18—C16—C12 | 121.26 (13) |
| B1—O2—C28 | 107.06 (10) | C18—C16—H16 | 119.37 (8)  |
| C2—C1—H1  | 120.39 (8)  | H17—C17—C13 | 119.45 (8)  |

|               |             |               |             |
|---------------|-------------|---------------|-------------|
| C3—C1—H1      | 120.39 (8)  | C18—C17—C13   | 121.09 (13) |
| C3—C1—C2      | 119.23 (13) | C18—C17—H17   | 119.45 (8)  |
| H2—C2—C1      | 119.91 (8)  | C17—C18—C16   | 119.31 (12) |
| C4—C2—C1      | 120.17 (13) | H18—C18—C16   | 120.35 (8)  |
| C4—C2—H2      | 119.91 (9)  | H18—C18—C17   | 120.35 (8)  |
| H3—C3—C1      | 119.76 (8)  | C20—C19—S1    | 124.75 (10) |
| C5—C3—C1      | 120.47 (13) | C21—C19—S1    | 116.36 (10) |
| C5—C3—H3      | 119.76 (8)  | C21—C19—C20   | 118.84 (12) |
| H4—C4—C2      | 119.45 (9)  | H20—C20—C19   | 119.80 (7)  |
| C6—C4—C2      | 121.10 (13) | C22—C20—C19   | 120.39 (13) |
| C6—C4—H4      | 119.45 (8)  | C22—C20—H20   | 119.80 (8)  |
| H5—C5—C3      | 119.56 (8)  | H21—C21—C19   | 119.78 (8)  |
| C6—C5—C3      | 120.87 (13) | C23—C21—C19   | 120.43 (13) |
| C6—C5—H5      | 119.56 (8)  | C23—C21—H21   | 119.78 (8)  |
| C5—C6—C4      | 118.15 (12) | H22—C22—C20   | 119.76 (8)  |
| C7—C6—C4      | 120.36 (13) | C24—C22—C20   | 120.48 (14) |
| C7—C6—C5      | 121.47 (13) | C24—C22—H22   | 119.76 (9)  |
| H7a—C7—C6     | 109.17 (7)  | H23—C23—C21   | 119.90 (8)  |
| H7b—C7—C6     | 109.17 (8)  | C24—C23—C21   | 120.20 (12) |
| H7b—C7—H7a    | 107.9       | C24—C23—H23   | 119.90 (8)  |
| C8—C7—C6      | 112.19 (11) | C23—C24—C22   | 119.56 (13) |
| C8—C7—H7a     | 109.17 (7)  | H24—C24—C22   | 120.22 (9)  |
| C8—C7—H7b     | 109.17 (8)  | H24—C24—C23   | 120.22 (8)  |
| H8a—C8—C7     | 108.64 (8)  | C26—C25—O1    | 108.69 (10) |
| H8b—C8—C7     | 108.64 (7)  | C27—C25—O1    | 106.64 (10) |
| H8b—C8—H8a    | 107.6       | C27—C25—C26   | 110.22 (12) |
| C9—C8—C7      | 114.49 (11) | C28—C25—O1    | 102.16 (10) |
| C9—C8—H8a     | 108.64 (7)  | C28—C25—C26   | 114.87 (11) |
| C9—C8—H8b     | 108.64 (7)  | C28—C25—C27   | 113.53 (11) |
| C8—C9—S1      | 109.94 (8)  | H26a—C26—C25  | 109.5       |
| H9—C9—S1      | 109.25 (4)  | H26b—C26—C25  | 109.5       |
| H9—C9—C8      | 109.25 (7)  | H26b—C26—H26a | 109.5       |
| C10—C9—S1     | 107.10 (8)  | H26c—C26—C25  | 109.5       |
| C10—C9—C8     | 112.01 (10) | H26c—C26—H26a | 109.5       |
| C10—C9—H9     | 109.25 (6)  | H26c—C26—H26b | 109.5       |
| H10—C10—C9    | 105.31 (6)  | H27a—C27—C25  | 109.5       |
| C11—C10—C9    | 117.94 (10) | H27b—C27—C25  | 109.5       |
| C11—C10—H10   | 105.31 (6)  | H27b—C27—H27a | 109.5       |
| B1—C10—C9     | 112.64 (10) | H27c—C27—C25  | 109.5       |
| B1—C10—H10    | 105.31 (7)  | H27c—C27—H27a | 109.5       |
| B1—C10—C11    | 109.23 (9)  | H27c—C27—H27b | 109.5       |
| C12—C11—C10   | 123.34 (11) | C25—C28—O2    | 102.89 (10) |
| C13—C11—C10   | 118.06 (11) | C29—C28—O2    | 106.62 (10) |
| C13—C11—C12   | 118.34 (11) | C29—C28—C25   | 112.87 (11) |
| C14—C12—C11   | 123.75 (11) | C30—C28—O2    | 108.22 (11) |
| C16—C12—C11   | 119.75 (12) | C30—C28—C25   | 115.31 (11) |
| C16—C12—C14   | 116.48 (12) | C30—C28—C29   | 110.22 (12) |
| C15—C13—C11   | 122.26 (12) | H29a—C29—C28  | 109.5       |
| C17—C13—C11   | 120.22 (12) | H29b—C29—C28  | 109.5       |
| C17—C13—C15   | 117.50 (12) | H29b—C29—H29a | 109.5       |
| H14a—C14—C12  | 109.5       | H29c—C29—C28  | 109.5       |
| H14b—C14—C12  | 109.5       | H29c—C29—H29a | 109.5       |
| H14b—C14—H14a | 109.5       | H29c—C29—H29b | 109.5       |
| H14c—C14—C12  | 109.5       | H30a—C30—C28  | 109.5       |

|               |       |               |            |
|---------------|-------|---------------|------------|
| H14c—C14—H14a | 109.5 | H30b—C30—C28  | 109.5      |
| H14c—C14—H14b | 109.5 | H30b—C30—H30a | 109.5      |
| H15a—C15—C13  | 109.5 | H30c—C30—C28  | 109.5      |
| H15b—C15—C13  | 109.5 | H30c—C30—H30a | 109.5      |
| H15b—C15—H15a | 109.5 | H30c—C30—H30b | 109.5      |
| H15c—C15—C13  | 109.5 | O2—B1—O1      | 113.65(11) |
| H15c—C15—H15a | 109.5 | C10—B1—O1     | 124.65(11) |
| H15c—C15—H15b | 109.5 | C10—B1—O2     | 121.60(11) |

---

(i) Sheldrick, G. M. SHELX-97, University of Gottingen, Gottingen, Germany, 1997.
