# Supplementary material
Source: PubMed Central journal article supplement (PMC6345169)
Supplement: NIHMS999962-supplement-b.pdf [file NIHMS999962-supplement-b.pdf]

# Enantioselective, Lewis Base-Catalyzed Carbosulfonylation of Alkenylboronates by 1,2-Boronate Migration

Zhonglin Tao, Kevin A. Robb, Jesse L. Panger, and Scott E. Denmark\*

*Roger Adams Laboratory, University of Illinois, 600 S. Mathews Ave., Urbana, Illinois 61801*

## SUPPORTING INFORMATION

| TABLE OF CONTENTS                        | PAGE |
|------------------------------------------|------|
| General Experimental                     | S2   |
| Literature Preparations                  | S4   |
| Experimental Procedures (General)        | S5   |
| Experimental Procedures (Detailed)       | S9   |
| Determinations of Absolute Configuration | S77  |
| Product Manipulations                    | S91  |
| NMR Spectra and HPLC Traces              | S102 |
| X-ray Data for (S,S)- <b>6ai</b>         | S175 |
| References                               | S182 |

## General Experimental

Reaction solvents tetrahydrofuran (Fisher, HPLC grade, not stabilized) and dichloromethane (Fisher, HPLC grade, not stabilized) were dried by percolation through two columns packed with neutral alumina under positive pressure of argon. Methanol and ethanol were distilled from magnesium turnings under a nitrogen atmosphere. Triethylamine was distilled from calcium hydride under a nitrogen atmosphere. Xylenes (Fisher) was sparged with argon for 15 min before use. Solvents for filtration, transfers, chromatography, and recrystallizations were purchased from commercial sources and used as received. "Brine" refers to a saturated solution of sodium chloride in distilled water. Column chromatography was performed using Merck grade 9385, 60 Å silica gel. Visualization was accomplished by UV light or ceric ammonium molybdate (CAM) solution. Analytical TLC was performed on Merck silica gel plates with F<sub>254</sub> indicator. *R<sub>f</sub>* values reported were measured using a 10 x 2 cm plate. All reactions were conducted under an atmosphere of dry argon.

<sup>1</sup>H and <sup>13</sup>C NMR spectra were recorded on a Bruker 500 MHz (500 MHz, <sup>1</sup>H; 126 MHz, <sup>13</sup>C) spectrometer. Spectra are referenced to residual chloroform ( $\delta$  = 7.26 ppm, <sup>1</sup>H; 77.16 ppm, <sup>13</sup>C). Chemical shifts are reported in parts per million. Assignments were obtained by reference to COSY, HMQC, HMBC, and TOCSY correlations. Elemental analysis was performed by the University of Illinois Microanalysis Laboratory or Robertson Microlit Laboratories. Mass spectrometry (MS) was performed by the University of Illinois Mass Spectrometry Laboratory. Electron Impact (EI) spectra were performed at 70 eV using methane as the carrier gas on a Finnagin-MAT C5 spectrometer. Electrospray Ionization (ESI) spectra were performed on a Micromass Q-ToF Ultima spectrometer. Data are reported in the form of *m/z* (intensity relative to the base peak = 100). Infrared spectra (IR) were recorded neat on a Perkin-Elmer FT-IR system and peaks were reported in cm<sup>-1</sup> with indicated relative intensities: s (strong, 0-33% T); m (medium, 34-66% T); w (weak, 67-100% T). Melting points (m.p.) were determined on a Thomas-Hoover capillary melting point apparatus in sealed tubes and are corrected.

The following organolithium reagents were purchased from Sigma-Aldrich and titrated by the method of Gilman et al.<sup>1-2</sup> prior to use: phenyllithium (1.9 M in dibutyl ether), *n*-butyllithium (1.6 M or 2.5 M in hexanes), and *tert*-butyllithium (1.7 M in pentane). 3-Chloroperbenzoic acid was purchased from Sigma-Aldrich ( $\leq 77\%$  by weight) and washed with phosphate buffer by the method of Aggarwal et al.<sup>3</sup> prior to use. *tert*-Butanol was distilled prior to use and stored over

molecular sieves. The following commercial reagents were used as received: 1-bromo-4-methoxybenzene, 1-bromo-4-chlorobenzene, 1-bromo-4-(trifluoromethyl)benzene, 4-bromobenzonitrile, 1-bromo-4-vinylbenzene, 3-(4-bromophenyl)pyridine, 2-bromo-1,3-dimethylbenzene, 1,1,1,2-tetrachloroethane, sodium perborate tetrahydrate, hydrogen peroxide (Sigma-Aldrich, 30% w/w aq.), tetra-*n*-butylammonium chloride (Alfa-Aesar), sodium hydroxide, hexafluoroisopropanol (Oakwood), 2,2,2-trifluoroethanol (Oakwood), sodium carbonate, triphenylphosphine (Oakwood), nitromethane (Sigma-Aldrich), Raney nickel (Oakwood, ®2800 slurry in water, active catalyst), trimethyloxonium tetrafluoroborate (Sigma-Aldrich), lithium wire, *N,N*-dimethylnaphthalen-1-amine (Alfa-Aesar), ammonia (compressed gas), isopropoxypinacolborane, methanesulfonic anhydride, and 4-methoxyaniline.

## Literature Preparations

The following alkenyl pinacolboranes were prepared by literature methods and the characterization data matched those previously reported: (*E*)-4-phenylbut-1-en-1-yl pinacolborane **1a**,<sup>4</sup> (*E*)-5-chloropent-1-en-1-yl pinacolborane **1c**,<sup>4</sup> (*E*)-6-bromohex-1-en-1-yl pinacolborane **1d**,<sup>4</sup> (*E*)-2-cyclohexylvinyl pinacolborane **1e**,<sup>4</sup> (*Z*)-5-phenylpent-2-en-2-yl pinacolborane **1g**,<sup>5</sup> isopropenyl pinacolborane **1h**,<sup>6-7</sup> and vinyl pinacolborane **1i**.<sup>8</sup> (*E*)-4-(*tert*-Butyldimethylsilyl)oxybut-1-en-1-yl pinacolborane **1b** was prepared from (but-3-yn-1-yloxy)(*tert*-butyl)dimethylsilane using a procedure described for an analogous transformation<sup>4</sup> and the characterization data matched those previously reported.<sup>9</sup> (*E*)-2-Methylhex-1-en-1-yl pinacolborane **1f** was prepared from (*Z*)-(2-bromohex-1-en-1-yl)pinacolborane<sup>10</sup> using a procedure described for an analogous transformation<sup>11</sup> and the characterization data matched those previously reported.<sup>12</sup> (*Z*)-4-Phenylbut-1-en-1-yl pinacolborane **1j** was prepared from 4-phenyl-1-butyne using a procedure described for an analogous transformation<sup>13</sup> and the characterization data matched those previously reported.<sup>14</sup> The following aryl pinacolboranes were prepared by literature methods and the characterization data matched those previously reported: (*o*-tolyl)pinacolboronic ester **9j**,<sup>15</sup> (naphthalen-2-yl)pinacolboronic ester **9k**,<sup>15</sup> 5-(pinacolboryl)-1-tosyl-1*H* indole **9l**,<sup>16</sup> and methyl 4-(pinacolboryl)benzoate **9n**.<sup>15</sup> (3-Bromophenyl)pinacolboronic ester **9m** was prepared from (3-bromophenyl)pinacolboronic acid using a procedure described for an analogous transformation<sup>15</sup> and the characterization data matched those previously reported.<sup>17</sup> The precursor to **8a**, (*E*)-(4-bromobut-3-en-1-yl)benzene, was prepared by a literature method and the characterization data matched those previously reported.<sup>18</sup> Sulfenylating agents *N*-(phenylthio)saccharin **4a**<sup>19</sup> and *N*-(phenylthio)phthalimide **4c**<sup>20</sup> were prepared by literature methods and characterization data matched those previously reported. Catalyst (*S*)-**5** was prepared by a literature method and the characterization data matched those previously reported.<sup>21</sup>

## Experimental Procedures (General)

### GP1: Carbosulfenylation of Vinyl Boronates by 1,2-Boronate Migration

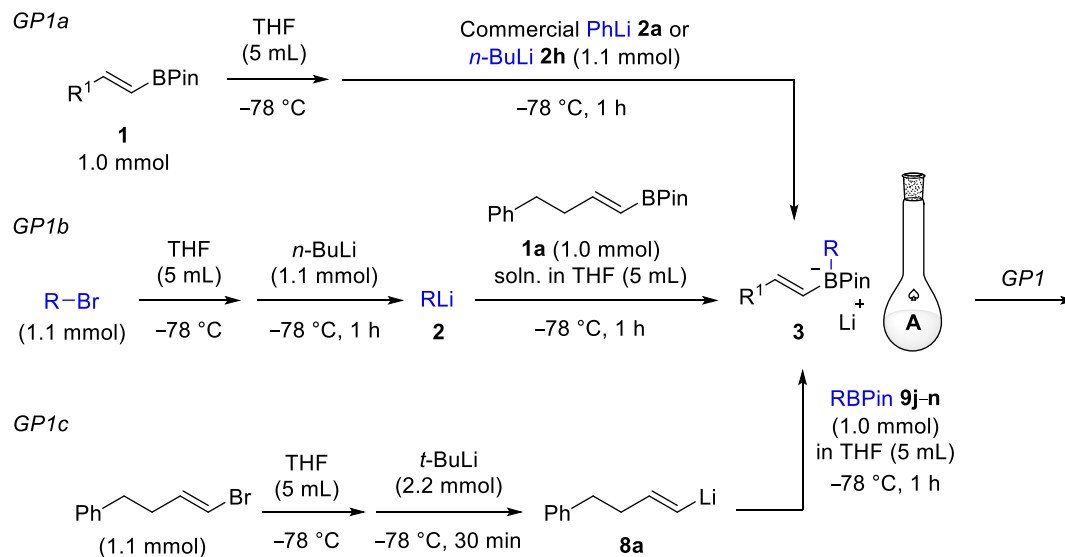

General procedures *GP1a*, *GP1b*, and *GP1c* only differ in how the boronate complex **3** is generated. The remaining steps are the same in all cases.

#### GP1a:

An oven-dried, 25-mL, Schlenk flask (**A**) equipped with a stir bar, septum, and digital thermocouple probe was charged with THF (5 mL) and alkenylpinacolboronate **1** (1.00 mmol). The resulting solution was cooled to  $-78\text{ }^{\circ}\text{C}$  using a dry ice/isopropanol bath. A commercial solution of either phenyllithium **2a** in *n*-Bu<sub>2</sub>O (1.05 mmol) or *n*-butyllithium **2h** in hexanes (1.10 mmol) was added dropwise over 10 min. After the addition, the resulting solution was stirred at  $-78\text{ }^{\circ}\text{C}$  for 1 h. *GP1a* was used to generate **3aa**, **3ah**, **3ba**, **3ca**, **3da**, **3ea**, **3fa**, **3ga**, **3ha**, **3ia**, and **3ja**.

#### GP1b:

An oven-dried, 25-mL, Schlenk flask (**A**) equipped with a stir bar, septum, and digital thermocouple probe was charged with THF (5 mL) and an appropriate bromoarene (1.10 mmol). The resulting solution was cooled to  $-78\text{ }^{\circ}\text{C}$  using a dry ice/isopropanol bath. A solution of *n*-butyllithium in hexanes (1.10 mmol) was added dropwise over 10 min. The resulting solution of aryllithium **2** was stirred at  $-78\text{ }^{\circ}\text{C}$  for 1 h. A solution of alkenylboronate **1a** (1.00 mmol) in THF (5

mL) was added dropwise to flask **A**. The solution was stirred at  $-78\text{ }^{\circ}\text{C}$  for 1 h. *GP1b* was used to generate **3ab**, **3ac**, **3ad**, **3ae**, **3af**, **3ag**, and **3ai**.

### *GP1c*:

An oven-dried, 25-mL, Schlenk flask (**A**) equipped with a stir bar, septum, and digital thermocouple probe was charged with THF (5 mL) and (*E*)-(4-bromobut-3-en-1-yl)benzene (1.10 mmol). The resulting solution was cooled to  $-78\text{ }^{\circ}\text{C}$  using a dry ice/isopropanol bath. A solution of *tert*-butyllithium in pentane (2.20 mmol) was added dropwise over 10 min. The resulting solution of alkenyllithium **8a** was stirred at  $-78\text{ }^{\circ}\text{C}$  for 30 min. A solution of arylboronic ester **9** (1.00 mmol) in THF (5 mL) was added dropwise to the freshly-prepared alkenyllithium **8a**, and the solution was stirred at  $-78\text{ }^{\circ}\text{C}$  for 1 h. *GP1c* was used to generate **3aj**, **3ak**, **3al**, **3am**, and **3an**.

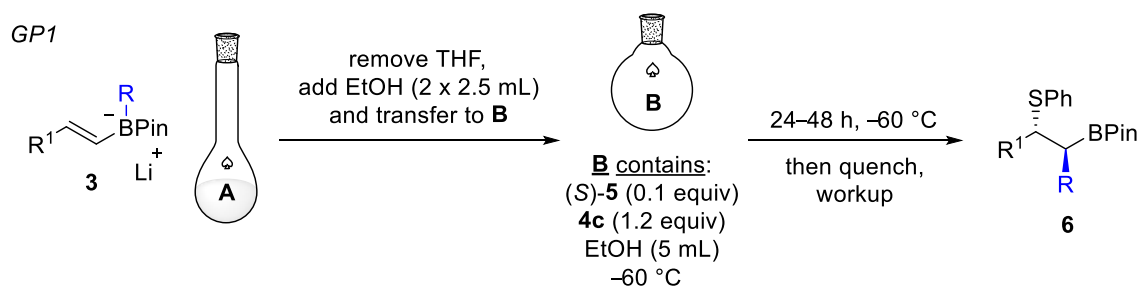

### *GP1*:

A separate, oven-dried, 25-mL, Schlenk flask (**B**) equipped with a stir bar was charged with chiral catalyst (*S*)-**5** (52 mg, 0.10 mmol, 0.10 equiv) and brought into the glove box. To the flask was added *N*-(phenylthio)saccharin **4a** (350 mg, 1.20 mmol, 1.20 equiv). The flask was sealed with a septum and removed from the glove box. Ethanol (5 mL) was added to flask **B**, and the resulting yellow suspension was sonicated under argon for 10 min. Flask **B** was equipped with a digital thermocouple probe and cooled to an internal temperature of  $-60\text{ }^{\circ}\text{C}$  using a Cryo-Cool. At this point, flask **A**, having been stirred for 1 h at  $-78\text{ }^{\circ}\text{C}$ , was placed under vacuum (0.01 mmHg) and the cold bath was removed. The solution was stirred rapidly under vacuum until all of the THF was removed (typically 20–30 min). The resulting solid boronate complex **3** in flask **A** was taken up in ethanol (2.5 mL) at  $25\text{ }^{\circ}\text{C}$ , and the resulting solution was added dropwise via syringe to flask **B** over 10 min. A white suspension resulted. An additional portion of ethanol (2.5 mL) was added to flask **A** and then transferred to flask **B** as just described, to ensure complete transfer of the boronate complex. Flask **B** was stirred at  $-60\text{ }^{\circ}\text{C}$  for 24–48 h. The reaction was quenched by the

addition of sat. aq.  $\text{NH}_4\text{Cl}$ . The flask was removed from the cold bath and the biphasic mixture was allowed to warm to 25 °C and stirred rapidly for 15 min. The mixture was extracted three times with  $\text{Et}_2\text{O}$  and the combined organic extracts were dried over magnesium sulfate, filtered, and concentrated to afford the crude  $\alpha$ -sulfenylated alkylborane **6**. If desired, the yield of borane **6** could be measured by quantitative  $^1\text{H}$ -NMR using 1,1,1,2-tetrachloroethane as an internal standard. A Hamilton gastight syringe was used to transfer 1,1,1,2-tetrachloroethane (55  $\mu\text{L}$ , 0.5 mmol) to the flask containing crude **6**, and the mixture was dissolved in chloroform-*d* (approx. 3 mL). An aliquot of this solution (approx. 0.25 mL) was passed through a pipet filter (to remove any insoluble components) into an NMR tube, and the filtrate was diluted with enough chloroform-*d* to reach a typical NMR sample volume. The  $^1\text{H}$  signal of the internal standard (singlet, 4.31 ppm, 2H) was integrated and normalized to 1.00. Then, the integration value of any non-overlapping (1H) signal of **6** (typically in the 4.00-1.00 ppm region) is equal to the yield of **6**.

GP2: Oxidation of alkylborane **6** to alcohol **7** (less sterically encumbered)

A 100-mL, round-bottomed flask equipped with a stir bar was charged with crude **6**, THF (10 mL) and water (10 mL). Sodium perborate tetrahydrate (616 mg, 4.0 mmol) and tetra-*n*-butylammonium chloride (28 mg, 0.1 mmol, optional) were added sequentially to the rapidly stirred biphasic mixture at 25 °C. The mixture was stirred rapidly at 25 °C and conversion was assessed by TLC (hexanes/ $\text{EtOAc}$ , 90:10, CAM). Upon completion, the oxidation was quenched with a reducing agent, either sodium bisulfite ( $\text{NaHSO}_3$ ) or sodium thiosulfate ( $\text{Na}_2\text{S}_2\text{O}_3$ ), and stirred for 15 min. The mixture was transferred to a separatory funnel and extracted multiple times with  $\text{Et}_2\text{O}$ . The combined organic phases were dried over magnesium sulfate, filtered, and concentrated to afford the crude alcohol **7** which was purified by silica gel chromatography.

GP3: Oxidation of borane **6** to alcohol **7** (more sterically encumbered)

A 100-mL, round-bottomed flask equipped with a stir bar was charged with crude **6** and THF (10 mL). The turbid solution was cooled to 0 °C with an ice bath. To this solution was added a mixture of 30% aq.  $\text{H}_2\text{O}_2$  (1 mL) and 3 M aq.  $\text{NaOH}$  (1 mL) also containing EDTA (1.0 mg/mL). The biphasic mixture was stirred rapidly at 0 °C. Conversion was assessed by TLC (hexanes/ $\text{EtOAc}$ , 90:10, CAM). Upon completion, the oxidation was quenched with a reducing agent, either sodium bisulfite ( $\text{NaHSO}_3$ ) or sodium thiosulfate ( $\text{Na}_2\text{S}_2\text{O}_3$ ), and stirred for 15 min.

The mixture was transferred to a separatory funnel and diluted with diethyl ether (30 mL). The layers were separated, and the aqueous layer was extracted with diethyl ether (2 x 15 mL). The combined organic phases were washed with brine (25 mL) and then dried over magnesium sulfate, filtered, and concentrated to afford the crude alcohol **7** which was purified by silica gel chromatography.

### Preparation of Racemic Standards ((±)-**7**)

The rapid background reactivity between boronate complexes **3** and reagent **4a** in aprotic solvents enabled an expedient synthesis of racemic products (±)-**7**. The general procedure is as follows. Boronate complex **3** was prepared on a 0.2 mmol scale by *GP1* (according to detailed procedures beginning on p. S9) at -78 °C in THF. Next, a solution of **4a** (1.20 equiv) in THF (1 mL) was added dropwise to the solution of **3** at -78 °C. The reaction mixture was slowly warmed to 25 °C over a period of several hours and stirring was continued at 25 °C for 12 h. The reaction was quenched with sat. aq. NH<sub>4</sub>Cl (2.5 mL) and worked up according to *GP1* to afford crude (±)-**6**. The crude alkylboranes were oxidized to (±)-**7** using either *GP2* or *GP3* (according to detailed procedures beginning on p. S9) and purified in analogous fashion to their enantiomerically enriched counterparts.

## Experimental Procedures (Detailed)

Preparation of (1*S*,2*S*)-(-)-1,4-Diphenyl-2-(phenylthio)butan-1-ol ((1*S*,2*S*)-(-)-**7aa**)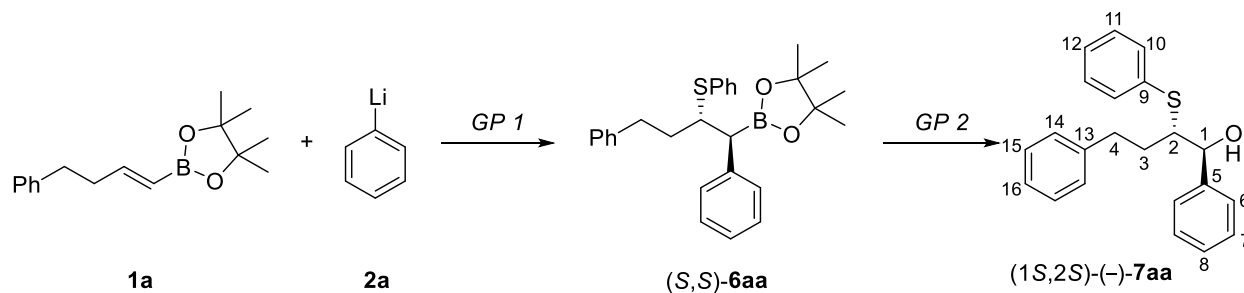

Alkylborane **6aa** was prepared according to *GP1a*. An oven-dried, 25-mL, Schlenk flask (**A**) equipped with a stir bar, septum, and digital thermocouple probe was charged with THF (5 mL) and (*E*)-4-phenylbut-1-en-1-yl pinacolborane **1a** (259.1 mg, 1.00 mmol). The resulting colorless solution was cooled to  $-78\text{ }^{\circ}\text{C}$  using a dry ice/isopropanol bath, and then stirred for 15 min to allow the temperature to equilibrate. A solution of phenyllithium **2a** in diethyl ether (1.77 M, 595  $\mu\text{L}$ , 1.05 mmol, 1.05 equiv) was added dropwise over 10 min, such that the internal temperature did not exceed  $-68\text{ }^{\circ}\text{C}$ . The resulting pale, yellow solution was stirred at  $-78\text{ }^{\circ}\text{C}$  for 1 h. A separate, oven-dried, 25-mL, Schlenk flask (**B**) equipped with a stir bar was charged with chiral (*S*)-catalyst **5** (51.6 mg, 0.10 mmol, 0.10 equiv) and brought into the glove box. To the flask was added *N*-(phenylthio)saccharin **4a** (350.9 mg, 1.20 mmol, 1.20 equiv). The flask was sealed with a septum and removed from the glove box. Absolute ethanol (5 mL) was added to flask **B**, and the resulting yellow suspension was sonicated under argon for 10 min. Flask **B** was equipped with a digital thermocouple probe and cooled to an internal temperature of  $-60\text{ }^{\circ}\text{C}$  using a Cryo-Cool. Flask **A**, having been stirred for 1 h at  $-78\text{ }^{\circ}\text{C}$ , was placed under vacuum (0.01 mmHg) and the cold bath was removed. The solution was stirred rapidly under vacuum for 30 min until all of the THF was removed. The resulting beige-colored, foam solid boronate complex **3aa** in flask **A** was taken up in ethanol (2.5 mL) at  $25\text{ }^{\circ}\text{C}$ , and the resulting solution was added dropwise via syringe to flask **B** over 10 min. A white suspension resulted. An additional portion of ethanol (2.5 mL) was added to flask **A** and then transferred to flask **B** as just described, to ensure complete transfer of the boronate. Flask **B** was stirred at  $-60\text{ }^{\circ}\text{C}$  for 36 h. The reaction was quenched by the addition of sat. aq.  $\text{NH}_4\text{Cl}$  (2.5 mL). The flask was removed from the cold bath and the biphasic mixture was allowed to warm to  $25\text{ }^{\circ}\text{C}$ . The mixture was diluted with  $\text{Et}_2\text{O}$  (5 mL) and water (5

mL) and stirred rapidly to dissolve all solids. The biphasic mixture was transferred to a 60-mL separatory funnel and the layers were separated. The aqueous layer was extracted with Et<sub>2</sub>O (2 x 10 mL), and the combined organic layers were dried over magnesium sulfate, filtered, and concentrated (30 °C, 15 mmHg) to afford 551.6 mg of crude alkylborane **6aa** as a red oil. The yield of **6aa** was determined to be 97% by quantitative <sup>1</sup>H-NMR as described previously (p. S7).

Borane **6aa** was oxidized to alcohol **7aa** according to GP2. A 100-mL, round-bottomed flask equipped with a stir bar was charged with crude **6aa** (551.6 mg), THF (10 mL) and water (10 mL). Sodium perborate tetrahydrate (600.3 mg, 3.9 mmol) and tetra-*n*-butylammonium chloride (28.0 mg, 0.10 mmol) were added sequentially to the rapidly stirred biphasic mixture at 25 °C. The beige-colored mixture was stirred rapidly for 3 h. Full conversion was observed by TLC (hexanes/EtOAc, 90:10, CAM). The oxidation was quenched by the addition of solid sodium bisulfite, NaHSO<sub>3</sub> (1.20 g) and the resulting cream-colored mixture was stirred for 15 min. Then, aq. NaOH was added (1 M, 20 mL) and the mixture was stirred for 30 min. The mixture was transferred to a separatory funnel and diluted with Et<sub>2</sub>O (30 mL). The layers were separated, and the aqueous layer was extracted with Et<sub>2</sub>O (2 x 15 mL). The combined organic phases were washed with brine (25 mL) and then dried over magnesium sulfate, filtered, and concentrated (30 °C, 15 mmHg) to afford 444.4 mg of crude **7aa** as a red oil. The product was purified by chromatography (silica gel, 3 x 20 cm, dry load on Celite, 25-mL fractions, hexanes/EtOAc gradient elution: 95:5 (600 mL) to 90:10 (600 mL)) to afford 299.3 mg of **7aa** as a pink oil. The product was purified to an analytical standard by diffusion pump Kugelrohr distillation (135 °C ABT, 4.0 x 10<sup>-5</sup> mmHg) to afford 283.0 mg (85% yield) of **7aa** as a viscous, pale, yellow oil.

Data for (1*S*,2*S*)-(-)-**7aa**:

b.p.: 135 °C (ABT, 4.0 x 10<sup>-5</sup> mmHg)

<sup>1</sup>H NMR: (500 MHz, CDCl<sub>3</sub>)

7.50–7.44 (m, 2H, HC(10)), 7.35–7.26 (m, 8H, HC(6), HC(8), HC(7), HC(11), HC(12)), 7.22–7.17 (m, 2H, HC(15)), 7.16–7.11 (m, 1H, HC(16)), 6.96 (d, *J* = 7.1 Hz, 2H, HC(14)), 4.47 (dd, *J* = 8.4, 2.0 Hz, 1H, HC(1)), 3.39 (d, *J* = 2.0 Hz, 1H, OH), 3.15 (ddd, *J* = 10.0, 8.7, 3.5 Hz, 1H, HC(2)), 2.95 (ddd, *J* = 14.1, 9.4, 4.8 Hz, 1H, H<sub>2</sub>C(4)), 2.65 (ddd, *J* = 13.9, 9.2, 7.5 Hz, 1H, H<sub>2</sub>C(4)), 1.79–1.69 (m, 1H, H<sub>2</sub>C(3)), 1.61 (dtd, *J* = 14.4, 9.7, 4.8 Hz, 1H, H<sub>2</sub>C(3)).

<sup>13</sup>C NMR: (126 MHz, CDCl<sub>3</sub>)

141.3 (C(13)), 141.0 (C(5)), 133.5 (HC(10)), 133.0 (C(9)), 129.2 (HC(11) or HC(14) or HC(15) or HC(7)), 128.53 (two overlapping signals: HC(14) or HC(15) or HC(11) or HC(7)), 128.46 (HC(7) or HC(11) or HC(14) or HC(15)), 128.2 (HC(8)), 127.9 (HC(12)), 127.3 (HC(6)), 126.0 (HC(16)), 75.8 (HC(1)), 58.7 (HC(2)), 33.2 (H<sub>2</sub>C(4)), 32.4 (H<sub>2</sub>C(3)).

IR: (neat)

3436 (w), 3060 (w), 3026 (w), 2924 (w), 2858 (w), 1948 (w), 1879 (w), 1807 (w), 1602 (w), 1583 (w), 1495 (w), 1479 (w), 1453 (m), 1438 (w), 1383 (w), 1332 (w), 1319 (w), 1298 (w), 1239 (w), 1188 (w), 1156 (w), 1088 (w), 1061 (w), 1025 (m), 1001 (w), 985 (w), 912 (w), 843 (w), 824 (w), 782 (w), 743 (s), 695 (s), 636 (w), 603 (w), 561 (w), 512 (m), 488 (m).

LRMS: (EI, 70 eV)

51.0 (11), 65.1 (14), 77.0 (27), 79.0 (21), 91.0 (100), 92.1 (10), 107.0 (11), 110.0 (12), 115.0 (10), 117.1 (79), 118.1 (21), 123.0 (11), 135.0 (10), 228.1 (49), 334.1 (4), 335.1 (1).

Analysis: C<sub>22</sub>H<sub>22</sub>OS (334.48)

Calcd: C, 79.00%; H, 6.63%

Found: C, 79.14%; H, 6.45%

TLC: *R<sub>f</sub>* 0.14 (hexanes/EtOAc, 90:10, CAM)

HPLC: (1*R*,2*R*)-**7aa** *t<sub>R</sub>* 13.9 min (2%); (1*S*,2*S*)-**7aa** *t<sub>R</sub>* 14.9 min (98%) (Supelco Astec, hexanes/*i*-PrOH, 80:20, 0.5 mL/min, 220 nm, 24 °C)

Opt. Rot.: [ $\alpha$ ]<sub>D</sub><sup>24</sup> -58.6 (*c* = 1.41 in 95% EtOH) (96% ee)

**Preparation of (1*S*,2*S*)-(-)-1-(4-Methoxyphenyl)-4-phenyl-2-(phenylthio)butan-1-ol ((1*S*,2*S*)-(-)-**7ab**)**

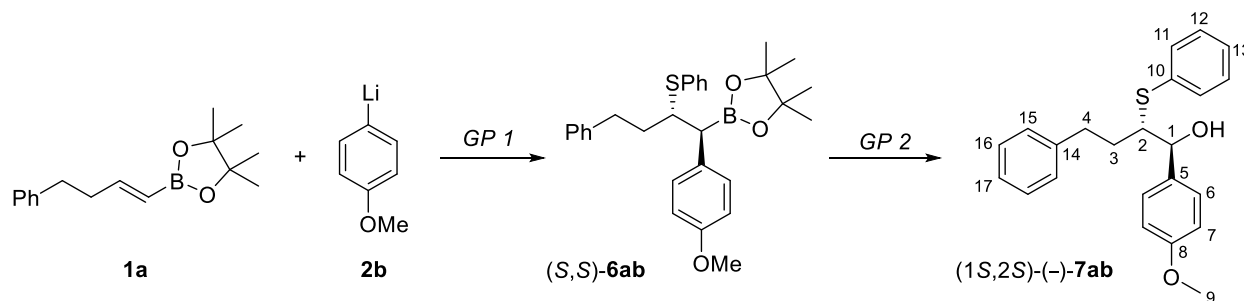

Alkylborane **6ab** was prepared according to *GP1b*. A flame-dried, 25-mL Schlenk flask (**A**) equipped with a magnetic stir bar, septum, and digital thermocouple probe was charged with 1-bromo-4-methoxybenzene (137.7  $\mu$ L, 1.10 mmol, 1.10 equiv) and THF (5 mL). The resulting solution was cooled to  $-78$   $^{\circ}$ C using a dry ice/isopropanol bath. A solution of *n*-butyllithium in hexanes (667  $\mu$ L, 1.65 M, 1.10 equiv) was added dropwise over 10 min. The resulting solution of 4-methoxyphenyllithium **2b** was stirred at  $-78$   $^{\circ}$ C for 1 h. Then, a solution of (*E*)-4-phenylbut-1-en-1-yl pinacolborane **1a** (1.0 mmol, 1.0 equiv, 258.2 mg) in THF (5 mL) was added dropwise to flask **A** over 15 min. The resulting solution of **3ab** was stirred at  $-78$   $^{\circ}$ C for 1 h. A separate, oven-dried, 25-mL, Schlenk flask (**B**) equipped with a stir bar was charged with chiral catalyst (*S*)-**5** (52.1 mg, 0.10 mmol, 0.10 equiv) and brought into the glove box. To the flask was added *N*-(phenylthio)saccharin **4a** (350.0 mg, 1.20 mmol, 1.20 equiv). The flask was sealed with a septum and removed from the glove box. Absolute ethanol (5 mL) was added to flask **B**, and the resulting yellow suspension was sonicated under argon for 10 min. Flask **B** was equipped with a digital thermocouple probe and cooled to an internal temperature of  $-60$   $^{\circ}$ C using a Cryo-Cool. Flask **A**, having been stirred for 1 h at  $-78$   $^{\circ}$ C, was placed under vacuum (0.01 mmHg) and the cold bath was removed. The solution was stirred rapidly under vacuum for 30 min until all of the THF was removed. The resulting foam solid boronate complex **3ab** in flask **A** was taken up in ethanol (2.5 mL) at 25  $^{\circ}$ C, and the resulting solution was added dropwise via syringe to flask **B** over 10 min. A white suspension resulted. An additional portion of ethanol (2.5 mL) was added to flask **A** and then transferred to flask **B** as just described, to ensure complete transfer of the boronate. Flask **B** was stirred at  $-60$   $^{\circ}$ C for 24 h. The reaction was quenched by the addition of sat. aq.  $\text{NH}_4\text{Cl}$  (1 mL). The flask was removed from the cold bath and the biphasic mixture was allowed to warm to

25 °C and stirred rapidly for 15 min. The biphasic mixture was transferred to a 250-mL round bottom flask (using Et<sub>2</sub>O to transfer) and volatile components were removed by rotary evaporation (30 °C, 50 mmHg). The residue was transferred to a separatory funnel with Et<sub>2</sub>O (50 mL) and sat. aq. NaHCO<sub>3</sub> (25 mL), and the layers were separated. The aqueous layer was extracted with Et<sub>2</sub>O (3 x 50 mL), and the combined organic layers were dried over magnesium sulfate, filtered, and concentrated (30 °C, 50 mmHg) to afford crude alkylborane **6ab**.

Borane **6ab** was oxidized to alcohol **7ab** according to GP2. A 100-mL, round-bottomed flask equipped with a stir bar was charged with crude **6ab**, THF (10 mL) and water (10 mL). Sodium perborate tetrahydrate (616 mg, 4.0 mmol) was added to the rapidly stirred biphasic mixture at 25 °C. The mixture was stirred rapidly for 3 h. Full conversion was observed by TLC (hexanes/EtOAc, 90:10, CAM). The oxidation was quenched by the addition of sat. aq. sodium thiosulfate (Na<sub>2</sub>S<sub>2</sub>O<sub>3</sub>) solution (25 mL) and was stirred for 30 min at 25 °C. The mixture was transferred to a separatory funnel and extracted with Et<sub>2</sub>O (4 x 50 mL). The combined organic phases were dried over magnesium sulfate, filtered, and concentrated (30 °C, 50 mmHg) to afford crude **7ab**. The product was purified by chromatography (silica gel, 3 x 20 cm, wet load using CH<sub>2</sub>Cl<sub>2</sub>, 25-mL fractions, hexanes/EtOAc gradient elution: 95:5 (600 mL) to 90:10 (600 mL)) to afford 328.6 mg (90%) of **7ab** as an oil. The product was purified to an analytical standard by diffusion pump Kugelrohr distillation (160 °C ABT, 4.0 x 10<sup>-5</sup> mmHg) to afford 321.6 mg (88% yield) of **7ab** as a viscous oil.

Data for (1*S*,2*S*)-(-)-**7ab**:

b.p.: 160 °C (ABT, 4.0 x 10<sup>-5</sup> mmHg)

<sup>1</sup>H NMR: (500 MHz, CDCl<sub>3</sub>)

7.49 (dd, *J* = 7.5, 1.8 Hz, 2H, HC(11)), 7.37 – 7.28 (m, 3H, HC(12) and HC(13)), 7.22 – 7.17 (m, 4H, HC(6) and HC(16)), 7.14 (t, *J* = 7.2 Hz, 1H, HC(17)), 6.97 (d, *J* = 7.2 Hz, 2H, HC(15)), 6.83 (d, *J* = 8.6 Hz, 2H, HC(7)), 4.42 (dd, *J* = 8.6, 1.6 Hz, 1H, HC(1)), 3.80 (s, 3H, H<sub>3</sub>C(9)), 3.37 (d, *J* = 1.9 Hz, 1H, OH), 3.12 (td, *J* = 9.8, 3.4 Hz, 1H, HC(2)), 2.95 (ddd, *J* = 14.1, 9.5, 4.7 Hz, 1H, H<sub>2</sub>C(4)), 2.65 (ddd, *J* = 13.9, 9.2, 7.4 Hz, 1H, H<sub>2</sub>C(4)), 1.72 (dddd, *J* = 13.1, 10.1, 7.3, 3.4 Hz, 1H, H<sub>2</sub>C(3)), 1.58 (ddd, *J* = 14.4, 9.6, 4.7 Hz, 1H, H<sub>2</sub>C(3)).

<sup>13</sup>C NMR: (126 MHz, CDCl<sub>3</sub>)

159.5 (C(8)), 141.3 (C(14)), 133.5 (C(11)), 133.0 (C(10)), 133.0 (C(5)), 129.2

(C(12)), 128.6 (C(15)), 128.4 (C(6)), 128.4 (C(16)), 127.9 (C(13)), 126.0 (C(17)), 113.9 (C(7)), 75.4 (C(1)), 58.7 (C(2)), 55.4 (C(9)), 33.2 (C(4)), 32.3 (C(3)).

IR: (neat)

3451 (w), 3025 (w), 2931 (w), 2835 (w), 1742 (w), 1610 (w), 1583 (w), 1511 (m), 1496 (w), 1478 (w), 1454 (w), 1438 (w), 1381 (w), 1302 (w), 1246 (m), 1173 (m), 1111 (w), 1087 (w), 1067 (w), 1029 (m), 908 (w), 832 (m), 734 (m), 695 (m), 647 (w), 609 (w), 574 (w), 540 (w), 516 (w).

LRMS: (ESI,  $[M+Na]^+$ )

129.1 (19), 237.1 (100), 347.1 (25), 387.1 (16).

HRMS: calcd for  $C_{23}H_{24}O_2SNa$  ( $[M+Na]^+$ ): 387.1395, found: 387.1394

Analysis:  $C_{23}H_{24}O_2S$  (364.50)

Calcd: C, 75.79; H, 6.64%

Found: C, 76.19; H, 6.45%

TLC:  $R_f$  0.33 (hexanes/EtOAc, 83:17, CAM)

HPLC: (1*S*,2*S*)-**7ab**  $t_R$  17.3 min (98%); (1*R*,2*R*)-**7ab**  $t_R$  22.5 min (2%) (Regis (*R,R*)-Whelk O1, hexanes/*i*-PrOH, 80:20, 0.5 mL/min, 220 nm, 24 °C)

Opt. Rot.:  $[\alpha]_D^{24} -60.2$  ( $c = 0.72$  in 100% EtOH) (96% ee)

**Preparation of (1*S*,2*S*)-(-)-1-(4-Chlorophenyl)-4-phenyl-2-(phenylthio)butan-1-ol ((1*S*,2*S*)-(-)-**7ac**)**

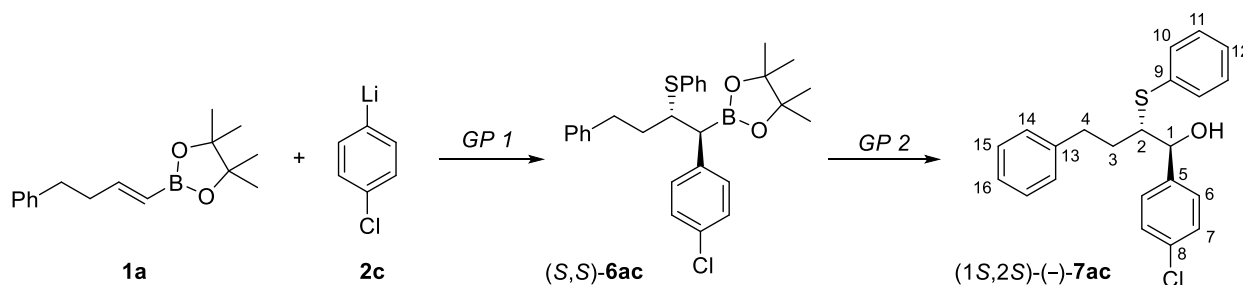

Alkylborane **6ac** was prepared according to *GP1b*. A flame-dried, 25-mL Schlenk flask (**A**) equipped with a magnetic stir bar, septum, and digital thermocouple probe was charged with 1-bromo-4-chlorobenzene (210.7 mg, 1.10 mmol, 1.10 equiv) and THF (5 ml). The resulting solution was cooled to  $-78$  °C using a dry ice/isopropanol bath. A solution of *n*-butyllithium in hexanes (697  $\mu$ L, 1.58 M, 1.10 equiv) was added dropwise over 10 min. The resulting solution of

4-chlorophenyllithium **2c** was stirred at  $-78\text{ }^{\circ}\text{C}$  for 1 h. Then, a solution of (*E*)-4-phenylbut-1-en-1-yl pinacolborane **1a** (1.0 mmol, 1.0 equiv, 258.2 mg) in THF (5 mL) was added dropwise to flask **A** over 15 min. The resulting solution of **3ac** was stirred at  $-78\text{ }^{\circ}\text{C}$  for 1 h. A separate, flame-dried, 50-mL Schlenk flask (**B**) equipped with a stir bar was charged with chiral catalyst (*S*)-**5** (52.1 mg, 0.10 mmol, 0.10 equiv) and brought into the glove box. To the flask was added *N*-(phenylthio)saccharin **4a** (350.0 mg, 1.20 mmol, 1.20 equiv). The flask was sealed with a septum and removed from the glove box. Absolute ethanol (5 mL) was added to flask **B**, and the resulting yellow suspension was sonicated under argon for 10 min. Flask **B** was equipped with a digital thermocouple probe and cooled to an internal temperature of  $-60\text{ }^{\circ}\text{C}$  using a Cryo-Cool. Flask **A**, having been stirred for 1 h at  $-78\text{ }^{\circ}\text{C}$ , was placed under vacuum (0.01 mmHg) and the cold bath was removed. The solution was stirred rapidly under vacuum for 30 min until all of the THF was removed. The resulting foam solid boronate complex **3ac** in flask **A** was taken up in ethanol (2.5 mL) at  $25\text{ }^{\circ}\text{C}$ , and the resulting solution was added dropwise via syringe to flask **B** over 10 min. A white suspension resulted. An additional portion of ethanol (2.5 mL) was added to flask **A** and then transferred to flask **B** as just described, to ensure complete transfer of the boronate. Flask **B** was stirred at  $-60\text{ }^{\circ}\text{C}$  for 24 h. The reaction was quenched by the addition of sat. aq.  $\text{NH}_4\text{Cl}$  (1 mL). The flask was removed from the cold bath and the biphasic mixture was allowed to warm to  $25\text{ }^{\circ}\text{C}$  and stirred rapidly for 15 min. The biphasic mixture was transferred to a 250-mL round bottom flask (using  $\text{Et}_2\text{O}$  to transfer) and volatile components were removed by rotary evaporation ( $30\text{ }^{\circ}\text{C}$ , 50 mmHg). The residue was transferred to a separatory funnel with  $\text{Et}_2\text{O}$  (50 mL) and sat. aq.  $\text{NaHCO}_3$  (25 mL), and the layers were separated. The aqueous layer was extracted with  $\text{Et}_2\text{O}$  (3 x 50 mL), and the combined organic layers were dried over magnesium sulfate, filtered, and concentrated ( $30\text{ }^{\circ}\text{C}$ , 50 mmHg) to afford crude alkylborane **6ac**.

Borane **6ac** was oxidized to alcohol **7ac** according to GP2. A 100-mL, round-bottomed flask equipped with a stir bar was charged with crude **6ac**, THF (10 mL) and water (10 mL). Sodium perborate tetrahydrate (616 mg, 4.0 mmol) was added to the rapidly stirred biphasic mixture at  $25\text{ }^{\circ}\text{C}$ . The mixture was stirred rapidly for 3 h. Full conversion was observed by TLC (hexanes/ $\text{EtOAc}$ , 90:10, CAM). The oxidation was quenched by the addition of sat. aq. sodium thiosulfate ( $\text{Na}_2\text{S}_2\text{O}_3$ ) solution (25 mL) and was stirred for 30 min at  $25\text{ }^{\circ}\text{C}$ . The mixture was transferred to a separatory funnel and extracted with  $\text{Et}_2\text{O}$  (4 x 50 mL). The combined organic phases were washed with sat. aq. sodium thiosulfate ( $\text{Na}_2\text{S}_2\text{O}_3$ ) solution (25 mL), dried over

magnesium sulfate, filtered, and concentrated (30 °C, 50 mmHg) to afford crude **7ac**. The product was purified by chromatography (silica gel, 3 x 20 cm, wet load using CH<sub>2</sub>Cl<sub>2</sub>, 25-mL fractions, hexanes/EtOAc gradient elution: 95:5 (600 mL) to 90:10 (600 mL)) to afford 316.2 mg (85% yield) of **7ac** as an oil. The product was purified to an analytical standard by diffusion pump Kugelrohr distillation (160 °C ABT, 4.0 x 10<sup>-5</sup> mmHg) to afford 312.2 mg (85%) of **7ac** as a viscous oil.

Data for (1*S*,2*S*)-(-)-**7ac**:

b.p.: 160 °C (ABT, 4.0 x 10<sup>-5</sup> mmHg)

<sup>1</sup>H NMR: (500 MHz, CDCl<sub>3</sub>)

7.46 (dd, *J* = 6.6, 2.9 Hz, 2H, HC(10)), 7.32 (dd, *J* = 4.7, 1.8 Hz, 3H, HC(11) and HC(12)), 7.28 – 7.15 (m, 7H, HC(6) and HC(7) and HC(15) and HC(16)), 7.00 (d, *J* = 7.2 Hz, 2H, HC(14)), 4.47 (dd, *J* = 8.2, 2.4 Hz, 1H, HC(1)), 3.41 (d, *J* = 2.4 Hz, 1H, OH), 3.10 (ddd, *J* = 9.9, 8.1, 3.5 Hz, 1H, HC(2)), 2.98 (ddd, *J* = 13.9, 9.2, 4.9 Hz, 1H, H<sub>2</sub>C(4)), 2.69 (ddd, *J* = 13.9, 9.1, 7.5 Hz, 1H, H<sub>2</sub>C(4)), 1.74 (dddd, *J* = 14.1, 9.0, 7.5, 3.5 Hz, 1H, H<sub>2</sub>C(3)), 1.62 (dtd, *J* = 14.4, 9.6, 4.8 Hz, 1H, H<sub>2</sub>C(3)).

<sup>13</sup>C NMR: (126 MHz, CDCl<sub>3</sub>)

141.1 (C(13)), 139.6 (C(5)), 133.9 (C(8)), 133.6 (C(10)), 132.6 (C(9)), 129.3 (C(11)), 128.6 (C(15)), 128.6 (C(14)), 128.5 (C(6) and C(7)), 128.1 (C(12)), 126.2 (C(16)), 75.0 (C(1)), 58.5 (C(2)), 33.2 (C(4)), 32.2 (C(3)).

IR: (neat)

3430 (w), 3059 (w), 3025 (w), 2927 (w), 1741 (w), 1599 (w), 1582 (w), 1490 (w), 1480 (w), 1453 (w), 1438 (w), 1409 (w), 1379 (w), 1307 (w), 1264 (w), 1184 (w), 1087 (m), 1068 (w), 1025 (w), 1013 (m), 910 (w), 831 (m), 784 (w), 738 (m), 694 (m), 632 (w), 607 (w), 550 (w), 517 (w), 489 (w).

LRMS: (ESI, [M+Na]<sup>+</sup>)

216.9(7), 241.1(5), 365.1(4), 391.1(100).

HRMS: calcd for C<sub>22</sub>H<sub>21</sub>ClOSNa ([M+Na]<sup>+</sup>): 391.0899, found: 391.0883

Analysis: C<sub>22</sub>H<sub>21</sub>ClOS (368.92)

Calcd: C, 71.63; H, 5.74%

Found: C, 71.65; H, 5.64%

TLC: *R<sub>f</sub>* 0.40 (hexanes/EtOAc, 83:17, CAM)

HPLC: (1*S*,2*S*)-**7ac** *t<sub>R</sub>* 14.8 min (97%); (1*R*,2*R*)-**7ac** *t<sub>R</sub>* 17.5 min (3%) (Regis (*R,R*)-Whelk

O1, hexanes/*i*-PrOH, 90:10, 0.5 mL/min, 220 nm, 24 °C)

Opt. Rot.:  $[\alpha]_{\text{D}}^{24} -77.0$  ( $c = 1.45$  in 100% EtOH) (94% ee)

**Preparation of (1*S*,2*S*)-(-)-4-Phenyl-2-(phenylthio)-1-(4-(trifluoromethyl)phenyl)butan-1-ol ((1*S*,2*S*)-(-)-**7ad**)**

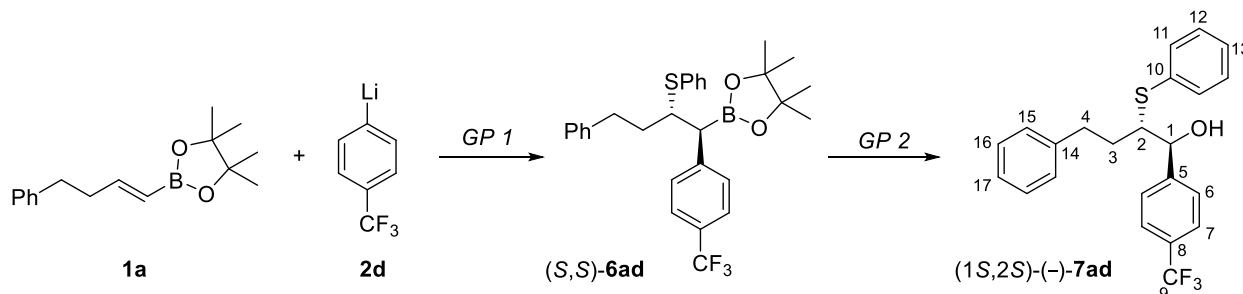

Alkylborane **6ad** was prepared according to *GP1b*. A flame-dried, 25-mL Schlenk flask (**A**) equipped with a magnetic stir bar, septum, and digital thermocouple probe was charged with 1-bromo-4-(trifluoromethyl)benzene (154  $\mu\text{L}$ , 1.10 mmol, 1.10 equiv) and THF (5 ml). The resulting solution was cooled to  $-78$  °C using a dry ice/isopropanol bath. A solution of *n*-butyllithium in hexanes (667  $\mu\text{L}$ , 1.65 M, 1.10 equiv) was added dropwise over 10 min. The resulting solution of 4-(trifluoromethyl)phenyllithium **2d** was stirred at  $-78$  °C for 1 h. Then, a solution of (*E*)-4-phenylbut-1-en-1-yl pinacolborane **1a** (258.2 mg, 1.0 mmol, 1.0 equiv) in THF (5 ml) was added dropwise to flask **A** over 15 min. The resulting solution of **3ad** was stirred at  $-78$  °C for 1 h. A separate, flame-dried, 50-mL Schlenk flask (**B**) equipped with a stir bar was charged with chiral catalyst (*S*)-**5** (52.1 mg, 0.10 mmol, 0.10 equiv) and brought into the glove box. To the flask was added *N*-(phenylthio)saccharin **4a** (350.0 mg, 1.20 mmol, 1.20 equiv). The flask was sealed with a septum and removed from the glove box. Absolute ethanol (5 mL) was added to flask **B**, and the resulting yellow suspension was sonicated under argon for 10 min. Flask **B** was equipped with a digital thermocouple probe and cooled to an internal temperature of  $-60$  °C using a Cryo-Cool. Flask **A**, having been stirred for 1 h at  $-78$  °C, was placed under vacuum (0.01 mmHg) and the cold bath was removed. The solution was stirred rapidly under vacuum for 30 min until all of the THF was removed. The resulting foam solid boronate complex **3ad** in flask **A** was taken up in ethanol (2.5 mL) at 25 °C, and the resulting solution was added dropwise via syringe to flask **B** over 10 min. A white suspension resulted. An additional portion of ethanol (2.5

mL) was added to flask **A** and then transferred to flask **B** as just described, to ensure complete transfer of the boronate. Flask **B** was stirred at  $-60\text{ }^{\circ}\text{C}$  for 24 h. The reaction was quenched by the addition of sat. aq.  $\text{NH}_4\text{Cl}$  (1 mL). The flask was removed from the cold bath and the biphasic mixture was allowed to warm to  $25\text{ }^{\circ}\text{C}$  and stirred rapidly for 15 min. The biphasic mixture was transferred to a 250-mL round bottom flask (using  $\text{Et}_2\text{O}$  to transfer) and volatile components were removed by rotary evaporation ( $30\text{ }^{\circ}\text{C}$ , 50 mmHg). The residue was transferred to a separatory funnel with  $\text{Et}_2\text{O}$  (50 mL) and sat. aq.  $\text{NaHCO}_3$  (25 mL), and the layers were separated. The aqueous layer was extracted with  $\text{Et}_2\text{O}$  (3 x 50 mL), and the combined organic layers were dried over magnesium sulfate, filtered, and concentrated ( $30\text{ }^{\circ}\text{C}$ , 50 mmHg) to afford crude alkylborane **6ad**.

Borane **6ad** was oxidized to alcohol **7ad** according to GP2. A 100-mL, round-bottomed flask equipped with a stir bar was charged with crude **6ad**, THF (10 mL) and water (10 mL). Sodium perborate tetrahydrate (616 mg, 4.0 mmol) was added to the rapidly stirred biphasic mixture at  $25\text{ }^{\circ}\text{C}$ . The mixture was stirred rapidly for 2 h. Full conversion was observed by TLC (hexanes/ $\text{EtOAc}$ , 90:10, CAM). The oxidation was quenched by the addition of sat. aq. sodium thiosulfate ( $\text{Na}_2\text{S}_2\text{O}_3$ ) solution (25 mL) and was stirred for 30 min at  $25\text{ }^{\circ}\text{C}$ . The mixture was transferred to a separatory funnel and extracted with  $\text{Et}_2\text{O}$  (4 x 50 mL). The combined organic phases were washed with sat. aq. sodium thiosulfate ( $\text{Na}_2\text{S}_2\text{O}_3$ ) solution (25 mL), dried over magnesium sulfate, filtered, and concentrated ( $30\text{ }^{\circ}\text{C}$ , 50 mmHg) to afford crude **7ad**. The product was purified by chromatography (silica gel, 3 x 20 cm, dry load on Celite, 25-mL fractions, hexanes/ $\text{EtOAc}$  gradient elution: 95:5 (600 mL) to 90:10 (600 mL)) to afford 344.0 mg (85% yield) of **7ad** as an oil. The product was purified to an analytical standard by diffusion pump Kugelrohr distillation ( $160\text{ }^{\circ}\text{C}$  ABT,  $4.0 \times 10^{-5}$  mmHg) to afford 333.2 mg (83%) of **7ad** as a viscous oil.

Data for (1*S*,2*S*)-(-)-**7ad**:

b.p.:  $160\text{ }^{\circ}\text{C}$  (ABT,  $4.0 \times 10^{-5}$  mmHg)

$^1\text{H}$  NMR: (500 MHz,  $\text{CDCl}_3$ )

7.52 (d,  $J = 8.2$  Hz, 2H, HC(7)), 7.41 (dd,  $J = 6.5, 3.0$  Hz, 2H, HC(11)), 7.36 (d,  $J = 8.1$  Hz, 2H, HC(6)), 7.31 – 7.27 (m, 3H, HC(12) and HC(13)), 7.21 (t,  $J = 7.2$  Hz, 2H, HC(16)), 7.16 (dd,  $J = 8.6, 5.8$  Hz, 1H, HC(17)), 6.99 (d,  $J = 7.2$  Hz, 2H, HC(15)), 4.55 (dd,  $J = 7.8, 2.9$  Hz, 1H, HC(1)), 3.42 (d,  $J = 2.8$  Hz, 1H, OH), 3.14 (ddd,  $J = 9.8, 7.7, 3.7$  Hz, 1H, HC(2)), 2.99 (ddd,  $J = 13.8, 8.9, 4.9$  Hz, 1H,  $\text{H}_2\text{C}(4)$ ),

2.70 (dt,  $J = 13.9, 8.2$  Hz, 1H, H<sub>2</sub>C(4)), 1.75 (dtd,  $J = 16.6, 8.2, 3.7$  Hz, 1H, H<sub>2</sub>C(3)), 1.66 (dtd,  $J = 14.4, 9.5, 4.9$  Hz, 1H, H<sub>2</sub>C(3)).

<sup>13</sup>C NMR: (126 MHz, CDCl<sub>3</sub>)  
145.2 (C(5)), 140.9 (C(14)), 133.5 (C(11)), 132.5 (C(10)), 130.3 (q,  $J = 32.3$  Hz, 1C, C(8)), 129.3 (C(12)), 128.6 (C(15)), 128.5 (C(16)), 128.1 (C(13)), 127.5 (C(6)), 126.2 (C(17)), 125.3 (q,  $J = 3.8$  Hz, 1C, C(7)), 124.2 (q,  $J = 272.0$  Hz, 1C, C(9)), 75.0 (C(1)), 58.3 (C(2)), 33.2 (C(4)), 32.3 (C(3)).

<sup>19</sup>F NMR: (471 MHz, CDCl<sub>3</sub>)  
−62.56.

IR: (neat)  
3429 (w), 3061 (w), 3026 (w), 2932 (w), 1619 (w), 1602 (w), 1583 (w), 1496 (w), 1479 (w), 1454 (w), 1439 (w), 1416 (w), 1383 (w), 1323 (s), 1162 (m), 1119 (m), 1087 (w), 1066 (s), 1016 (m), 911 (w), 844 (w), 744 (m), 696 (m), 609 (w), 515 (w), 491 (w).

LRMS: (ESI, [M+Na]<sup>+</sup>)  
275.1 (100), 341.1 (59), 425.1 (55).

HRMS: calcd for C<sub>23</sub>H<sub>21</sub>F<sub>3</sub>OSNa ([M+Na]<sup>+</sup>): 425.1163, found: 425.1154

Analysis: C<sub>23</sub>H<sub>21</sub>F<sub>3</sub>OS (402.48)  
Calcd: C, 68.64; H, 5.26%  
Found: C, 68.36; H, 5.16%

TLC:  $R_f$  0.38 (hexanes/EtOAc, 83:17, CAM)

HPLC: (1*S*,2*S*)-**7ad**  $t_R$  10.8 min (97%); (1*R*,2*R*)-**7ad**  $t_R$  12.5 min (3%) (Regis (*R,R*)-Whelk O1, hexanes/*i*-PrOH, 90:10, 0.5 mL/min, 220 nm, 24 °C)

Opt. Rot.:  $[\alpha]_D^{24}$  −68.2 ( $c = 1.13$  in 100% EtOH) (94% ee)

**Preparation of 4-((1*S*,2*S*)-(-)-1-Hydroxy-4-phenyl-2-(phenylthio)butyl)benzonitrile ((1*S*,2*S*)-(-)-**7ae**)**

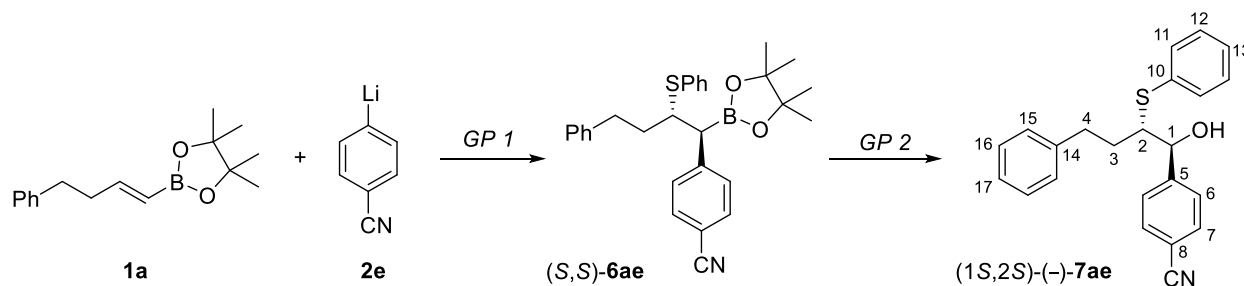

Alkylborane **6ae** was prepared by a **modification** of *GP1b*. A flame-dried, 25-mL Schlenk flask (**A**) equipped with a magnetic stir bar, septum, and digital thermocouple probe was charged with (*E*)-4-phenylbut-1-en-1-yl pinacolborane **1a** (516.4 mg, 2.0 mmol, 1.0 equiv), 4-bromobenzonitrile (436.8 mg, 2.4 mmol, 1.2 equiv) and THF (10 mL). The resulting solution was cooled to  $-78\text{ }^{\circ}\text{C}$  using a dry ice/isopropanol bath. A solution of *n*-butyllithium in hexanes (1.35 mL, 1.55 M, 1.05 equiv) was added dropwise over 10 min. The resulting solution of **3ae** was stirred at  $-78\text{ }^{\circ}\text{C}$  for 1 h. A separate, flame-dried, 50-mL Schlenk flask (**B**) equipped with a stir bar was charged with chiral catalyst (*S*)-**5** (104.0 mg, 0.20 mmol, 0.10 equiv) and brought into the glove box. To the flask was added *N*-(phenylthio)saccharin **4a** (700.0 mg, 2.40 mmol, 1.20 equiv). The flask was sealed with a septum and removed from the glove box. Absolute ethanol (10 mL) was added to flask **B**, and the resulting yellow suspension was sonicated under argon for 10 min. Flask **B** was equipped with a digital thermocouple probe and cooled to an internal temperature of  $-60\text{ }^{\circ}\text{C}$  using a Cryo-Cool. Flask **A**, having been stirred for 1 h at  $-78\text{ }^{\circ}\text{C}$ , was placed under vacuum (0.01 mmHg) and the cold bath was removed. The solution was stirred rapidly under vacuum for 30 min until all of the THF was removed. The resulting foam solid boronate complex **3ae** in flask **A** was taken up in ethanol (5 mL) at  $25\text{ }^{\circ}\text{C}$ , and the resulting solution was added dropwise via syringe to flask **B** over 10 min. A white suspension resulted. An additional portion of ethanol (5 mL) was added to flask **A** and then transferred to flask **B** as just described, to ensure complete transfer of the boronate. Flask **B** was stirred at  $-60\text{ }^{\circ}\text{C}$  for 24 h. The reaction was quenched by the addition of sat. aq.  $\text{NH}_4\text{Cl}$  (1 mL). The flask was removed from the cold bath and the biphasic mixture was allowed to warm to  $25\text{ }^{\circ}\text{C}$  and stirred rapidly for 15 min. The biphasic mixture was transferred to a 250-mL round bottom flask (using  $\text{Et}_2\text{O}$  to transfer) and volatile components were removed by rotary evaporation ( $30\text{ }^{\circ}\text{C}$ , 50 mmHg). The residue was transferred to a separatory

funnel with Et<sub>2</sub>O (50 mL) and sat. aq. NaHCO<sub>3</sub> (25 mL), and the layers were separated. The aqueous layer was extracted with Et<sub>2</sub>O (3 x 50 mL), and the combined organic layers were dried over magnesium sulfate, filtered, and concentrated (30 °C, 50 mmHg) to afford crude alkylborane **6ae**.

Borane **6ae** was oxidized to alcohol **7ae** by a **modification** of GP2. A 100-mL, round-bottomed flask equipped with a stir bar was charged with crude **6ae**, THF (20 mL) and sat. aq. NH<sub>4</sub>Cl solution (20 mL). Sodium perborate tetrahydrate (1.232 g, 8.0 mmol) was added to the rapidly stirred biphasic mixture at 25 °C. The mixture was stirred rapidly for 3 h. Full conversion was observed by TLC (hexanes/EtOAc, 90:10, CAM). The oxidation was quenched by the addition of sat. aq. sodium thiosulfate (Na<sub>2</sub>S<sub>2</sub>O<sub>3</sub>) solution (25 mL) and was stirred for 30 min at 25 °C. The mixture was transferred to a separatory funnel and extracted with Et<sub>2</sub>O (4 x 50 mL). The combined organic phases were washed with sat. aq. sodium thiosulfate (Na<sub>2</sub>S<sub>2</sub>O<sub>3</sub>) solution (25 mL), dried over magnesium sulfate, filtered, and concentrated (30 °C, 50 mmHg) to afford crude **7ae**. The product was purified by chromatography (silica gel, 3 x 20 cm, dry load on Celite, 25-mL fractions, hexanes/EtOAc gradient elution: 90:10 (600 mL) to 83:17 (600 mL)) to afford 441.1 mg (61% yield) of **7ae** as an oil. The product was purified to an analytical standard by diffusion pump Kugelrohr distillation (160 °C ABT, 4.0 x 10<sup>-5</sup> mmHg) to afford 432.9 mg (60%) of **7ae** as a viscous oil.

Data for (1*S*,2*S*)-(-)-**7ae**:

b.p.: 160 °C (ABT, 4.0 x 10<sup>-5</sup> mmHg)

<sup>1</sup>H NMR: (500 MHz, CDCl<sub>3</sub>)

7.54 (d, *J* = 8.2 Hz, 2H, HC(7)), 7.41 – 7.37 (m, 2H, HC(11)), 7.35 (d, *J* = 8.2 Hz, 2H, HC(6)), 7.31 – 7.27 (m, 3H, HC(12) and HC(13)), 7.23 (t, *J* = 7.2 Hz, 2H, HC(16)), 7.18 (t, *J* = 7.2 Hz, 1H, HC(17)), 7.00 (d, *J* = 7.0 Hz, 2H, HC(15)), 4.56 (d, *J* = 7.4 Hz, 1H, HC(1)), 3.43 (s, 1H, OH), 3.12 (ddd, *J* = 9.9, 7.4, 3.8 Hz, 1H, HC(2)), 2.98 (ddd, *J* = 13.9, 8.7, 5.1 Hz, 1H, H<sub>2</sub>C(4)), 2.72 (dt, *J* = 14.0, 8.2 Hz, 1H, H<sub>2</sub>C(4)), 1.74 (dddd, *J* = 15.2, 11.3, 7.3, 3.3 Hz, 1H, H<sub>2</sub>C(3)), 1.70 – 1.63 (m, 1H, H<sub>2</sub>C(3)).

<sup>13</sup>C NMR: (126 MHz, CDCl<sub>3</sub>)

146.6 (C(5)), 140.8 (C(14)), 133.5 (C(11)), 132.3 (C(10)), 132.1 (C(7)), 129.3 (C(12)), 128.6 (C(16)), 128.5 (C(15)), 128.2 (C(13)), 127.9 (C(6)), 126.3 (C(17)),

118.8 (C(9)), 111.8 (C(8)), 74.9 (C(1)), 58.0 (C(2)), 33.1 (C(4)), 32.3 (C(3)).

**IR:** (neat)

3452 (w), 3059 (w), 3026 (w), 2928 (w), 2228 (w), 1607 (w), 1582 (w), 1496 (w), 1481 (w), 1453 (w), 1438 (w), 1409 (w), 1382 (w), 1265 (w), 1191 (w), 1086 (w), 1068 (w), 1024 (w), 1000 (w), 909 (w), 840 (w), 736 (m), 695 (m), 647 (w), 610 (w), 549 (w), 533 (w), 486 (w).

**LRMS:** (ESI,  $[M+Na]^+$ )

196.9 (4), 232.1 (5), 256.8 (4), 382.1 (100).

**HRMS:** calcd for  $C_{23}H_{21}NOSNa$  ( $[M+Na]^+$ ): 382.1242 found: 382.1226

**Analysis:**  $C_{23}H_{21}NOS$  (359.49)

Calcd: C, 76.85; H, 5.89; N, 3.90%

Found: C, 76.72; H, 5.92; N, 3.98%

**TLC:**  $R_f$  0.28 (hexanes/EtOAc, 80:20, CAM)

**HPLC:** (1*S*,2*S*)-**7ae**  $t_R$  39.7 min (94%); (1*R*,2*R*)-**7ae**  $t_R$  46.2 min (6%) (Regis (*R,R*)-Whelk O1, hexanes/*i*-PrOH, 90:10, 0.5 mL/min, 220 nm, 24 °C)

**Opt. Rot.:**  $[\alpha]_D^{24} -112.4$  ( $c = 0.97$  in 100% EtOH) (88% ee)

**Preparation of (1*S*,2*S*)-(-)-4-Phenyl-2-(phenylthio)-1-(4-vinylphenyl)butan-1-ol ((1*S*,2*S*)-(-)-**7af**)**

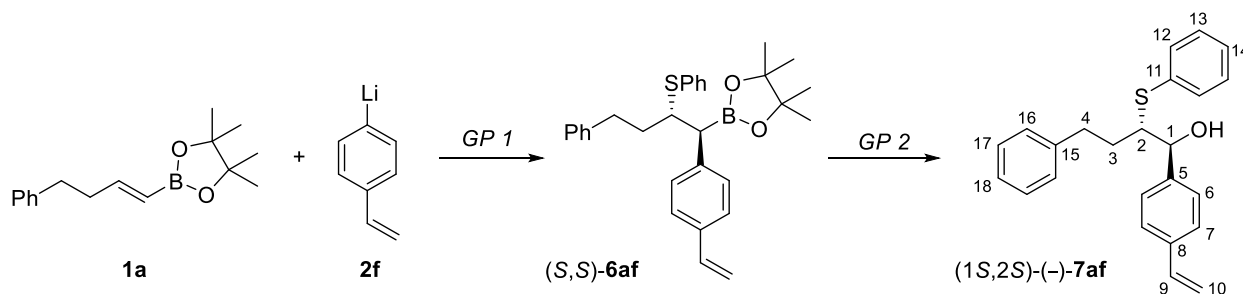

Alkylborane **6af** was prepared according to *GP1b*. A flame-dried, 25-mL Schlenk flask (**A**) equipped with a magnetic stir bar, septum, and digital thermocouple probe was charged with 1-bromo-4-vinylbenzene (144  $\mu$ L, 1.10 mmol, 1.10 equiv) and THF (5 mL). The resulting solution was cooled to  $-78$  °C using a dry ice/isopropanol bath. A solution of *n*-butyllithium in hexanes (645  $\mu$ L, 1.58 M, 1.02 equiv) was added dropwise over 10 min. The resulting solution of (4-

vinylphenyl)lithium **2f** was stirred at  $-78\text{ }^{\circ}\text{C}$  for 1 h. Then, a solution of (*E*)-4-phenylbut-1-en-1-yl pinacolborane **1a** (258.2 mg, 1.0 mmol, 1.0 equiv) in THF (5 mL) was added dropwise to flask **A** over 15 min. The resulting solution of **3af** was stirred at  $-78\text{ }^{\circ}\text{C}$  for 30 min. A separate, flame-dried, 50-mL Schlenk flask (**B**) equipped with a stir bar was charged with chiral catalyst (*S*)-**5** (52.1 mg, 0.10 mmol, 0.10 equiv) and brought into the glove box. To the flask was added *N*-(phenylthio)saccharin **4a** (350.0 mg, 1.20 mmol, 1.20 equiv). The flask was sealed with a septum and removed from the glove box. Absolute ethanol (5 mL) was added to flask **B**, and the resulting yellow suspension was sonicated under argon for 10 min. Flask **B** was equipped with a digital thermocouple probe and cooled to an internal temperature of  $-60\text{ }^{\circ}\text{C}$  using a Cryo-Cool. Flask **A**, having been stirred for 1 h at  $-78\text{ }^{\circ}\text{C}$ , was placed under vacuum (0.01 mmHg) and the cold bath was removed. The solution was stirred rapidly under vacuum for 30 min until all of the THF was removed. The resulting foam solid boronate complex **3af** in flask **A** was taken up in ethanol (2.5 mL) at  $25\text{ }^{\circ}\text{C}$ , and the resulting solution was added dropwise via syringe to flask **B** over 10 min. A white suspension resulted. An additional portion of ethanol (2.5 mL) was added to flask **A** and then transferred to flask **B** as just described, to ensure complete transfer of the boronate. Flask **B** was stirred at  $-60\text{ }^{\circ}\text{C}$  for 24 h. The reaction was quenched by the addition of sat. aq.  $\text{NH}_4\text{Cl}$  (1 mL). The flask was removed from the cold bath and the biphasic mixture was allowed to warm to  $25\text{ }^{\circ}\text{C}$  and stirred rapidly for 15 min. The biphasic mixture was transferred to a 250-mL round bottom flask (using  $\text{Et}_2\text{O}$  to transfer) and volatile components were removed by rotary evaporation ( $30\text{ }^{\circ}\text{C}$ , 50 mmHg). The residue was transferred to a separatory funnel with  $\text{Et}_2\text{O}$  (50 mL) and sat. aq.  $\text{NaHCO}_3$  (25 mL), and the layers were separated. The aqueous layer was extracted with  $\text{Et}_2\text{O}$  (3 x 50 mL), and the combined organic layers were dried over magnesium sulfate, filtered, and concentrated ( $30\text{ }^{\circ}\text{C}$ , 50 mmHg) to afford crude alkylborane **6af**.

Borane **6af** was oxidized to alcohol **7af** according to GP2. A 100-mL, round-bottomed flask equipped with a stir bar was charged with crude **6af**, THF (10 mL) and water (10 mL). Sodium perborate tetrahydrate (616 mg, 4.0 mmol) was added to the rapidly stirred biphasic mixture at  $25\text{ }^{\circ}\text{C}$ . The mixture was stirred rapidly for 2 h. Full conversion was observed by TLC (hexanes/ $\text{EtOAc}$ , 90:10, CAM). The oxidation was quenched by the addition of sat. aq. sodium thiosulfate ( $\text{Na}_2\text{S}_2\text{O}_3$ ) solution (25 mL) and was stirred for 30 min at  $25\text{ }^{\circ}\text{C}$ . The mixture was transferred to a separatory funnel and extracted with  $\text{Et}_2\text{O}$  (4 x 50 mL). The combined organic phases were washed with sat. aq. sodium thiosulfate ( $\text{Na}_2\text{S}_2\text{O}_3$ ) solution (25 mL), dried over

magnesium sulfate, filtered, and concentrated (30 °C, 50 mmHg) to afford crude **7af**. The product was purified by chromatography (silica gel, 3 x 20 cm, dry load on Celite, 25-mL fractions, hexanes/EtOAc gradient elution: 95:5 (600 mL) to 90:10 (600 mL)) to afford 248.8 mg (69% yield) of **7af** as an oil. The product was purified to an analytical standard by diffusion pump Kugelrohr distillation (160 °C ABT,  $4.0 \times 10^{-5}$  mmHg) to afford 215.3 mg (60%) of **7af** as a viscous oil. A small quantity of polymeric residue formed (and was left behind) during the distillation step.

Data for (1*S*,2*S*)-(-)-**7af**:

b.p.: 160 °C (ABT,  $4.0 \times 10^{-5}$  mmHg)

<sup>1</sup>H NMR: (500 MHz, CDCl<sub>3</sub>)

7.51 – 7.45 (m, 2H, HC(12)), 7.37 – 7.28 (m, 5H, HC(7) and HC(14) and HC(13)), 7.21 (dd,  $J = 17.4, 7.9$  Hz, 4H, HC(6) and HC(17)), 7.15 (t,  $J = 7.3$  Hz, 1H, HC(18)), 6.98 (d,  $J = 6.9$  Hz, 2H, HC(16)), 6.70 (dd,  $J = 17.6, 10.9$  Hz, 1H, HC(9)), 5.74 (dd,  $J = 17.6, 0.9$  Hz, 1H, H<sub>2</sub>C(10)), 5.24 (dd,  $J = 10.8, 0.9$  Hz, 1H, H<sub>2</sub>C(10)), 4.46 (d,  $J = 8.5$  Hz, 1H, HC(1)), 3.39 (s, 1H, OH), 3.14 (ddd,  $J = 10.1, 8.5, 3.5$  Hz, 1H, HC(2)), 2.97 (ddd,  $J = 13.9, 9.3, 4.6$  Hz, 1H, H<sub>2</sub>C(4)), 2.66 (ddd,  $J = 13.9, 9.3, 7.4$  Hz, 1H, H<sub>2</sub>C(4)), 1.74 (dddd,  $J = 13.0, 9.6, 7.3, 3.5$  Hz, 1H, H<sub>2</sub>C(3)), 1.60 (dtd,  $J = 14.5, 9.8, 4.8$  Hz, 1H, H<sub>2</sub>C(3)).

<sup>13</sup>C NMR: (126 MHz, CDCl<sub>3</sub>)

141.2 (C(15)), 140.6 (C(5)), 137.5 (C(8)), 136.6 (C(9)), 133.6 (C(12)), 132.9 (C(11)), 129.2 (C(13)), 128.6 (C(16)), 128.5 (C(17)), 128.0 (C(14)), 127.5 (C(6)), 126.4 (C(7)), 126.1 (C(18)), 114.1 (C(10)), 75.5 (C(1)), 58.6 (C(2)), 33.2 (C(4)), 32.3 (C(3)).

IR: (neat)

3432 (w), 3059 (w), 3024 (w), 2923 (w), 2856 (w), 1629 (w), 1602 (w), 1582 (w), 1510 (w), 1495 (w), 1478 (w), 1453 (w), 1438 (w), 1405 (w), 1381 (w), 1285 (w), 1176 (w), 1116 (w), 1087 (w), 1067 (w), 1025 (w), 1015 (w), 988 (w), 907 (w), 842 (m), 742 (m), 694 (m), 609 (w), 490 (w).

LRMS: (ESI, [M+Na]<sup>+</sup>)

117.1 (35), 129.1 (21), 233.1 (100), 328.0 (11), 343.2 (28), 383.1 (28).

HRMS: calcd for C<sub>24</sub>H<sub>24</sub>OSNa ([M+Na]<sup>+</sup>): 383.1446, found: 383.1438

Analysis: C<sub>24</sub>H<sub>24</sub>OS (360.52)

Calcd: C, 79.96; H, 6.71%

Found: C, 79.81; H, 6.52%

TLC: *R<sub>f</sub>* 0.37 (hexanes/EtOAc, 83:17, CAM)

HPLC: (1*S*,2*S*)-**7af** *t<sub>R</sub>* 20.8 min (98%); (1*R*,2*R*)-**7af** *t<sub>R</sub>* 29.0 min (2%) (Regis (*R,R*)-Whelk O1, hexanes/*i*-PrOH, 90:10, 0.5 mL/min, 220 nm, 24 °C)

Opt. Rot.: [ $\alpha$ ]<sub>D</sub><sup>24</sup> -48.1 (*c* = 1.57 in 100% EtOH) (96% ee)

**Preparation of (1*S*,2*S*)-(-)-4-Phenyl-2-(phenylthio)-1-(4-(pyridin-3-yl)phenyl)butan-1-ol ((1*S*,2*S*)-(-)-**7ag**)**

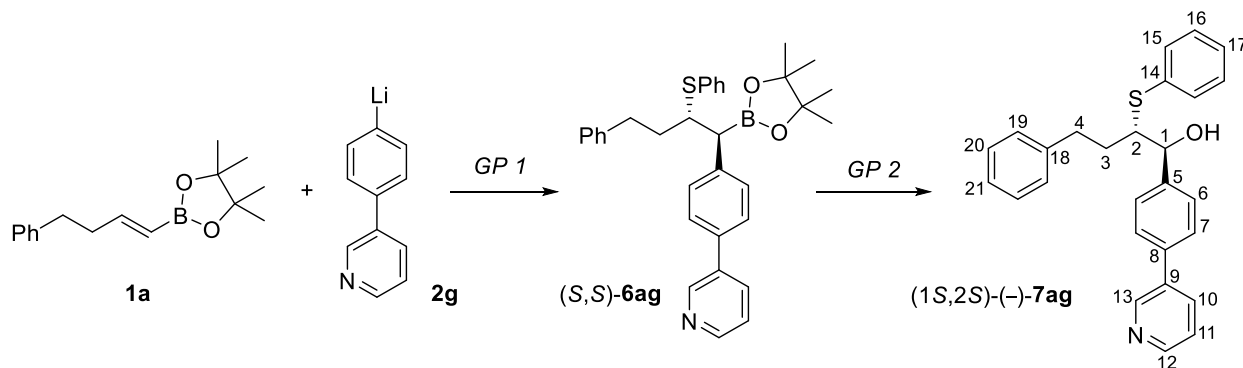

Alkylborane **6ag** was prepared according to *GP1b*. A flame-dried, 25-mL Schlenk flask (**A**) equipped with a magnetic stir bar, septum, and digital thermocouple probe was charged with 3-(4-bromophenyl)pyridine (327.6 mg, 1.4 mmol, 1.4 equiv) and THF (5 ml). The resulting solution was cooled to -78 °C using a dry ice/isopropanol bath. A solution of *n*-butyllithium in hexanes (903  $\mu$ L, 1.55M, 1.4 equiv) was added dropwise over 10 min. The resulting solution of (4-(pyridin-3-yl)phenyl)lithium **2g** was stirred at -78 °C for 1 h. Then, a solution of (*E*)-4-phenylbut-1-en-1-yl pinacolborane **1a** (1.0 mmol, 1.0 equiv, 258.2 mg) in THF (5 ml) was added dropwise to flask **A** over 15 min. The resulting solution of **3ag** was stirred at -78 °C for 1 h. A separate, flame-dried, 50-mL Schlenk flask (**B**) equipped with a stir bar was charged with chiral catalyst (*S*)-**5** (52.1 mg, 0.10 mmol, 0.10 equiv) and brought into the glove box. To the flask was added *N*-(phenylthio)saccharin **4a** (436.5 mg, 1.50 mmol, 1.50 equiv). The flask was sealed with a septum and removed from the glove box. Absolute ethanol (5 mL) was added to flask **B**, and the resulting yellow suspension was sonicated under argon for 10 min. Flask **B** was equipped with a digital thermocouple probe and cooled to an internal temperature of -60 °C using a Cryo-Cool.

Flask **A**, having been stirred for 1 h at  $-78\text{ }^{\circ}\text{C}$ , was placed under vacuum (0.01 mmHg) and the cold bath was removed. The solution was stirred rapidly under vacuum for 30 min until all of the THF was removed. The resulting foam solid boronate complex **3ag** in flask **A** was taken up in ethanol (2.5 mL) at  $25\text{ }^{\circ}\text{C}$ , and the resulting solution was added dropwise via syringe to flask **B** over 10 min at  $-60\text{ }^{\circ}\text{C}$ . A white suspension resulted. An additional portion of ethanol (2.5 mL) was added to flask **A** and then transferred to flask **B** as just described, to ensure complete transfer of the boronate. Flask **B** was stirred at  $-60\text{ }^{\circ}\text{C}$  for 24 h. The reaction was quenched by the addition of sat. aq.  $\text{NH}_4\text{Cl}$  (1 mL). The flask was removed from the cold bath and the biphasic mixture was allowed to warm to  $25\text{ }^{\circ}\text{C}$  and stirred rapidly for 15 min. The biphasic mixture was transferred to a 250-mL round bottom flask (using  $\text{Et}_2\text{O}$  to transfer) and volatile components were removed by rotary evaporation ( $30\text{ }^{\circ}\text{C}$ , 50 mmHg). The residue was transferred to a separatory funnel with  $\text{Et}_2\text{O}$  (50 mL) and sat. aq.  $\text{NaHCO}_3$  (25 mL), and the layers were separated. The aqueous layer was extracted with  $\text{Et}_2\text{O}$  (3 x 50 mL), and the combined organic layers were dried over magnesium sulfate, filtered, and concentrated ( $30\text{ }^{\circ}\text{C}$ , 50 mmHg) to afford crude alkylborane **6ag**.

Borane **6ag** was oxidized to alcohol **7ag** according to GP2. A 100-mL, round-bottomed flask equipped with a stir bar was charged with crude **6ag**, THF (10 mL) and water (10 mL). Sodium perborate tetrahydrate (616 mg, 4.0 mmol) was added to the rapidly stirred biphasic mixture at  $25\text{ }^{\circ}\text{C}$ . The mixture was stirred rapidly for 3 h. Full conversion was observed by TLC ( $\text{CH}_2\text{Cl}_2/\text{EtOAc}$ , 85:15, CAM). The oxidation was quenched by the addition of sat. aq. sodium thiosulfate ( $\text{Na}_2\text{S}_2\text{O}_3$ ) solution (25 mL) and was stirred for 30 min at  $25\text{ }^{\circ}\text{C}$ . The mixture was transferred to a separatory funnel and extracted with  $\text{Et}_2\text{O}$  (4 x 50 mL). The combined organic phases were washed with sat. aq. sodium thiosulfate ( $\text{Na}_2\text{S}_2\text{O}_3$ ) solution (25 mL), dried over magnesium sulfate, filtered, and concentrated ( $30\text{ }^{\circ}\text{C}$ , 50 mmHg) to afford crude **7ag**. The product was purified by chromatography (silica gel, 3 x 20 cm, wet load with  $\text{CH}_2\text{Cl}_2$ , 25-mL fractions,  $\text{CH}_2\text{Cl}_2/\text{EtOAc}$  gradient elution: 95:5 (600 mL) to 90:10 (600 mL)) to afford 320.2 mg (78% yield) of **7ag** as a white solid. Precipitation from hexanes/ $\text{Et}_2\text{O}$  afforded 299.9 mg (73%) of analytically pure **7ag** as a white solid.

Data for (1*S*,2*S*)-(-)-**7ag**:

m.p.:  $121\text{--}123\text{ }^{\circ}\text{C}$  (hexanes/ $\text{Et}_2\text{O}$ )

$^1\text{H}$  NMR: (500 MHz,  $\text{CDCl}_3$ )

8.81 – 8.77 (m, 1H, HC(13)), 8.60 – 8.55 (m, 1H, HC(12)), 7.88 – 7.82 (m, 1H,

HC(10)), 7.49 (d,  $J = 8.0$  Hz, 2H, HC(7)), 7.48 – 7.43 (m, 2H, HC(15)), 7.38 (d,  $J = 8.5$  Hz, 2H, HC(6)), 7.37 – 7.34 (m, 1H, HC(11)), 7.33 – 7.27 (m, 3H, HC(16) and HC(17)), 7.24 – 7.18 (m, 2H, HC(20)), 7.18 – 7.13 (m, 1H, HC(21)), 7.01 (d,  $J = 7.5$  Hz, 2H, HC(19)), 4.59 (d,  $J = 7.8$  Hz, 1H, HC(1)), 3.63 (bs, 1H, OH), 3.22 (ddd,  $J = 9.6, 7.9, 3.5$  Hz, 1H, HC(2)), 3.00 (ddd,  $J = 14.1, 9.3, 4.9$  Hz, 1H, H<sub>2</sub>C(4)), 2.71 (ddd,  $J = 13.9, 9.2, 7.3$  Hz, 1H, H<sub>2</sub>C(4)), 1.88 – 1.80 (m, 1H, H<sub>2</sub>C(3)), 1.73 – 1.63 (m, 1H, H<sub>2</sub>C(3)).

<sup>13</sup>C NMR: (126 MHz, CDCl<sub>3</sub>)  
148.6 (HC(12)), 148.3 (HC(13)), 141.22 (C(18) or C(5)), 141.20 (C(18) or C(5)), 137.5 (C(8)), 136.4 (C(9)), 134.5 (HC(10)), 133.4 (HC(15)), 133.0 (C(14)), 129.2 (HC(16)), 128.6 HC(19)), 128.5 (HC(20)), 128.0 (HC(6)), 127.9 (HC(17)), 127.2 (HC(7)), 126.1 (HC(21)), 123.7 (HC(11)), 75.3 (HC(1)), 58.4 (HC(2)), 33.2 (H<sub>2</sub>C(4)), 32.4 (H<sub>2</sub>C(3)).

IR: (neat)  
3219 (w), 1579 (w), 1495 (w), 1476 (w), 1454 (w), 1434 (w), 1391 (w), 1339 (w), 1302 (w), 1086 (w), 1025 (w), 1003 (w), 939 (w), 857 (w), 799 (w), 739 (m), 698 (m), 688 (m), 649 (w), 624 (w), 607 (w), 592 (w), 557 (w), 494 (w), 476 (w).

LRMS: (ESI, [M+H]<sup>+</sup>)  
302.2 (2), 412.2 (100).

HRMS: calcd for C<sub>27</sub>H<sub>26</sub>NOS ([M+H]<sup>+</sup>): 412.1735, found: 412.1735

Analysis: C<sub>27</sub>H<sub>25</sub>NOS (411.56)  
Calcd: C, 78.80; H, 6.12%; N, 3.40%  
Found: C, 78.44; H, 6.05%; N, 3.53%

TLC:  $R_f$  0.31 (hexanes/EtOAc, 50:50, CAM)

HPLC: (1*R*,2*R*)-**7ag**  $t_R$  45.30 min (19%); (1*S*,2*S*)-**7ag**  $t_R$  48.83 min (81%) (Supelco Astec, hexanes/*i*-PrOH, 80:20, 0.5 mL/min, 220 nm, 24 °C)

Opt. Rot.:  $[\alpha]_D^{24} -64.0$  ( $c = 1.07$  in 100% EtOH) (62% ee)

**Preparation of (3*S*,4*S*)-(+)-1-Phenyl-3-(phenylthio)octan-4-ol ((3*S*,4*S*)-(+)-**7ah**)**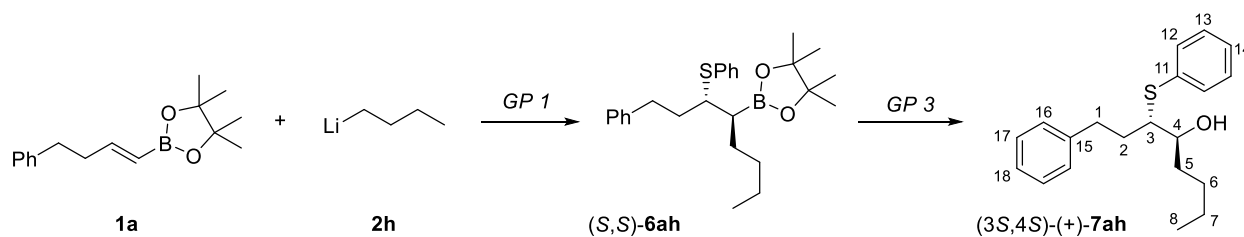

Alkylborane **6ah** was prepared according to *GP1a*. A flame-dried, 25-mL, Schlenk flask (**A**) equipped with a stir bar, septum, and digital thermocouple probe was charged with THF (5 mL) and (*E*)-4-phenylbut-1-en-1-yl pinacolborane **1a** (258.2 mg, 1.00 mmol). The resulting solution was cooled to  $-78\text{ }^{\circ}\text{C}$  using a dry ice/isopropanol bath. A solution of *n*-butyllithium **2h** in hexanes (696  $\mu\text{L}$ , 1.58 M, 1.10 equiv) was added dropwise over 10 min, and the resulting solution of **3ah** was stirred at  $-78\text{ }^{\circ}\text{C}$  for 1 h. A separate, flame-dried, 50-mL Schlenk flask (**B**) equipped with a stir bar was charged with chiral catalyst (*S*)-**5** (52.1 mg, 0.10 mmol, 0.10 equiv) and brought into the glove box. To the flask was added *N*-(phenylthio)saccharin **4a** (350.0 mg, 1.20 mmol, 1.20 equiv). The flask was sealed with a septum and removed from the glove box. Absolute ethanol (5 mL) was added to flask **B**, and the resulting yellow suspension was sonicated under argon for 10 min. Flask **B** was equipped with a digital thermocouple probe and cooled to an internal temperature of  $-60\text{ }^{\circ}\text{C}$  using a Cryo-Cool. Flask **A**, having been stirred for 1 h at  $-78\text{ }^{\circ}\text{C}$ , was placed under vacuum (0.01 mmHg) and the cold bath was removed. The solution was stirred rapidly under vacuum for 30 min until all of the THF was removed. The resulting foam solid boronate complex **3ah** in flask **A** was taken up in ethanol (2.5 mL) at  $25\text{ }^{\circ}\text{C}$ , and the resulting solution was added dropwise via syringe to flask **B** over 10 min. A white suspension resulted. An additional portion of ethanol (2.5 mL) was added to flask **A** and then transferred to flask **B** as just described, to ensure complete transfer of the boronate. Flask **B** was stirred at  $-78\text{ }^{\circ}\text{C}$  for 48 h. The reaction was quenched by the addition of sat. aq.  $\text{NH}_4\text{Cl}$  (1 mL). The flask was removed from the cold bath and the biphasic mixture was allowed to warm to  $25\text{ }^{\circ}\text{C}$  and stirred rapidly for 15 min. The biphasic mixture was transferred to a 250-mL round bottom flask (using  $\text{Et}_2\text{O}$  to transfer) and volatile components were removed by rotary evaporation ( $30\text{ }^{\circ}\text{C}$ , 50 mmHg). The residue was transferred to a separatory funnel with  $\text{Et}_2\text{O}$  (50 mL) and sat. aq.  $\text{NaHCO}_3$  (25 mL), and the layers were separated. The aqueous layer was extracted with  $\text{Et}_2\text{O}$  (3 x 50 mL), and the combined organic layers were dried over magnesium sulfate, filtered, and concentrated ( $30\text{ }^{\circ}\text{C}$ , 50 mmHg) to afford

crude alkylborane **6ah**.

Borane **6ah** was oxidized to alcohol **7ah** according to *GP3*. A 100-mL, round-bottomed flask equipped with a stir bar was charged with crude **6ah** and THF (10 mL). The turbid solution was cooled to 0 °C with an ice bath. To this solution was added a mixture of 30% aq. H<sub>2</sub>O<sub>2</sub> (1 mL) and 3 M aq. NaOH (1 mL) also containing EDTA (1.0 mg/mL). The biphasic mixture was stirred rapidly at 0 °C for 30 min. Full conversion was observed by TLC (hexanes/EtOAc, 90:10, CAM). The oxidation was quenched by the addition of sat. aq. sodium thiosulfate (Na<sub>2</sub>S<sub>2</sub>O<sub>3</sub>) solution (25 mL) and was stirred for 30 min at 25 °C. The mixture was transferred to a separatory funnel and extracted with Et<sub>2</sub>O (4 x 50 mL). The combined organic phases were washed with sat. aq. sodium thiosulfate (Na<sub>2</sub>S<sub>2</sub>O<sub>3</sub>) solution (25 mL), dried over magnesium sulfate, filtered, and concentrated (30 °C, 50 mmHg) to afford crude **7ah**. The product was purified by chromatography (silica gel, 3 x 20 cm, dry load on Celite, 25-mL fractions, hexanes/EtOAc gradient elution: 97:3 (600 mL) to 94:6 (600 mL)) to afford 153.9 mg (49% yield) of **7ah** as an oil. The product was purified to analytical standard by diffusion pump Kugelrohr distillation (160 °C ABT, 4.0 x 10<sup>-5</sup> mmHg) to afford 152.4 mg (48%) of **7ah** as a viscous oil.

Data for (3*S*,4*S*)-(+)-**7ah**:

b.p.: 160 °C (ABT, 4.0 x 10<sup>-5</sup> mmHg)

<sup>1</sup>H NMR: (500 MHz, CDCl<sub>3</sub>)

7.61 – 7.56 (m, 2H, HC(10)), 7.48 – 7.38 (m, 5H, HC(15) and HC(12) and HC(11)), 7.37 – 7.29 (m, 3H, HC(16) and HC(14)), 3.81 – 3.70 (m, 1H, HC(4)), 3.17 (dp, *J* = 12.6, 4.0 Hz, 2H, HC(3) and H<sub>2</sub>(1)), 2.96 (ddt, *J* = 13.6, 10.3, 4.8 Hz, 1H, H<sub>2</sub>C(1)), 2.54 (s, 1H, OH), 2.22 (dtq, *J* = 13.8, 7.4, 3.7 Hz, 1H, H<sub>2</sub>C(2)), 2.03 – 1.92 (m, 1H, H<sub>2</sub>C(2)), 1.82 – 1.73 (m, 1H, H<sub>2</sub>C(5)), 1.67 – 1.51 (m, 2H, H<sub>2</sub>C(5) and H<sub>2</sub>C(6)), 1.48 – 1.36 (m, 3H, H<sub>2</sub>C(6) and H<sub>2</sub>C(7)), 1.05 – 0.98 (m, 3H, H<sub>3</sub>C(8)).

<sup>13</sup>C NMR: (126 MHz, CDCl<sub>3</sub>)

141.6 (C(13)), 134.8 (C(9)), 132.4 (C(10)), 129.1 (C(15)), 128.6 (C(11)), 128.6 (C(14)), 127.3 (C(12)), 126.1 (C(16)), 73.2 (C(4)), 56.8 (C(3)), 34.0 (C(5)), 33.6 (C(1)), 33.3 (C(2)), 28.1 (C(6)), 22.8 (C(7)), 14.1 (C(8)).

IR: (neat)

3428 (w), 3060 (w), 3025 (w), 2929 (w), 2858 (w), 1740 (w), 1602 (w), 1583 (w), 1495 (w), 1479 (w), 1454 (w), 1438 (w), 1378 (w), 1272 (w), 1121 (w), 1088 (w),

1067 (w), 1025 (w), 993 (w), 903. (w), 740 (m), 694 (m), 585 (w), 562 (w), 487 (w).

**LRMS:** (ESI,  $[M+Na]^+$ )

187.1 (5), 227.1 (3), 297.2 (3), 337.2 (100), 352. 2(35).

**HRMS:** calcd for  $C_{20}H_{26}OSNa$  ( $[M+Na]^+$ ): 337.1602, found: 337.1589

**Analysis:**  $C_{20}H_{26}OS$  (314.49)

Calcd: C, 76.38; H, 8.33%

Found: C, 76.35; H, 8.38%

**TLC:**  $R_f$  0.46 (hexanes/EtOAc, 83:17, CAM)

**HPLC:** (3*S*,4*S*)-**7ah**  $t_R$  21.5 min (81%); (3*R*,4*R*)-**7ah**  $t_R$  23.8 min (19%) (Supelco Astec, hexanes/*i*-PrOH, 95:5, 0.5 mL/min, 220 nm, 24 °C)

**Opt. Rot.:**  $[\alpha]_D^{24} +17.1$  ( $c = 1.04$  in 100% EtOH) (62% ee)

**Preparation of (1*S*,2*S*)-(-)-1-(2,6-Dimethylphenyl)-4-phenyl-2-(phenylthio)butan-1-ol ((1*S*,2*S*)-(-)-**7ai**)**

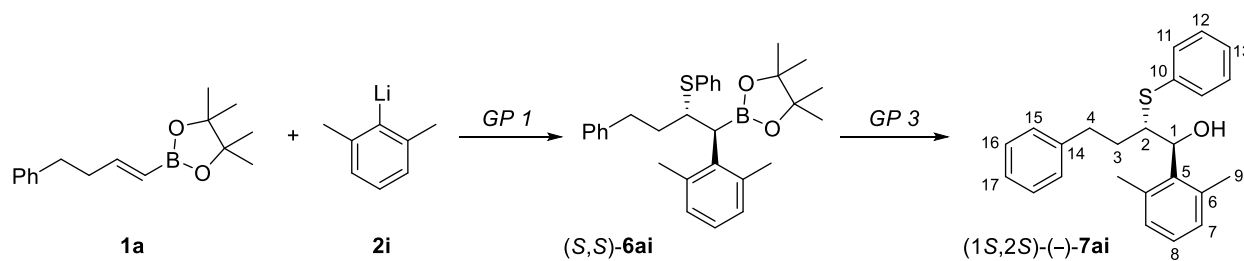

Alkylborane **6ai** was prepared according to *GP1b*. A flame-dried, 25-mL Schlenk flask (**A**) equipped with a magnetic stir bar, septum, and digital thermocouple probe was charged with 2-bromo-1,3-dimethylbenzene (147  $\mu$ L, 1.10 mmol, 1.10 equiv) and THF (5 ml). The resulting solution was cooled to  $-78$  °C using a dry ice/isopropanol bath. A solution of *n*-butyllithium in hexanes (667  $\mu$ L, 1.65 M, 1.10 equiv) was added dropwise over 10 min. The resulting solution of (2,6-dimethylphenyl)lithium **2i** was stirred at  $-78$  °C for 1 h. Then, a solution of (*E*)-4-phenylbut-1-en-1-yl pinacolborane **1a** (258.2 mg, 1.0 mmol, 1.0 equiv) in THF (5 ml) was added dropwise to flask **A** over 15 min. The resulting solution of **3ai** was stirred at  $-78$  °C for 30 min followed by  $25$  °C for 30 min. A separate, flame-dried, 50-mL Schlenk flask (**B**) equipped with a stir bar was charged with chiral catalyst (*S*)-**5** (52.1 mg, 0.10 mmol, 0.10 equiv) and brought into the glove

box. To the flask was added *N*-(phenylthio)saccharin **4a** (350.0 mg, 1.20 mmol, 1.20 equiv). The flask was sealed with a septum and removed from the glove box. Absolute ethanol (5 mL) was added to flask **B**, and the resulting yellow suspension was sonicated under argon for 10 min. Flask **B** was equipped with a digital thermocouple probe and cooled to an internal temperature of  $-60^{\circ}\text{C}$  using a Cryo-Cool. Flask **A**, having been stirred for 1 h, was returned to  $-78^{\circ}\text{C}$  and placed under vacuum (0.01 mmHg) and the cold bath was removed. The solution was stirred rapidly under vacuum for 30 min until all of the THF was removed. The resulting foam solid boronate complex **3ai** in flask **A** was taken up in ethanol (2.5 mL) at  $25^{\circ}\text{C}$ , and the resulting solution was added dropwise via syringe to flask **B** over 10 min. A white suspension resulted. An additional portion of ethanol (2.5 mL) was added to flask **A** and then transferred to flask **B** as just described, to ensure complete transfer of the boronate. Flask **B** was stirred at  $-60^{\circ}\text{C}$  for 24 h. The reaction was quenched by the addition of sat. aq.  $\text{NH}_4\text{Cl}$  (1 mL). The flask was removed from the cold bath and the biphasic mixture was allowed to warm to  $25^{\circ}\text{C}$  and stirred rapidly for 15 min. The biphasic mixture was transferred to a 250-mL round bottom flask (using  $\text{Et}_2\text{O}$  to transfer) and volatile components were removed by rotary evaporation ( $30^{\circ}\text{C}$ , 50 mmHg). The residue was transferred to a separatory funnel with  $\text{Et}_2\text{O}$  (50 mL) and sat. aq.  $\text{NaHCO}_3$  (25 mL), and the layers were separated. The aqueous layer was extracted with diethyl ether (3 x 50 mL), and the combined organic layers were dried over magnesium sulfate, filtered, and concentrated ( $30^{\circ}\text{C}$ , 50 mmHg) to afford crude alkylborane **6ai**. As compound **7ai** is difficult to separate from catalyst (*S*)-**5** by chromatography, **6ai** was purified by chromatography (silica gel, 3 x 20 cm, dry load on Celite, 25-mL fractions, hexanes/ $\text{CH}_2\text{Cl}_2$  gradient elution: 75:25 (600 mL) to 65:35 (600 mL)) prior to oxidation.

Borane **6ai** was oxidized to alcohol **7ai** according to *GP3*. A 100-mL, round-bottomed flask equipped with a stir bar was charged with crude **6ai** and THF (10 mL). The turbid solution was cooled to  $0^{\circ}\text{C}$  with an ice bath. To this solution was added a mixture of 30% aq.  $\text{H}_2\text{O}_2$  (1 mL) and 3 M aq.  $\text{NaOH}$  (1 mL) also containing EDTA (1.0 mg/mL). The biphasic mixture was stirred rapidly at  $0^{\circ}\text{C}$  for 30 min. Full conversion was observed by TLC (hexanes/ $\text{EtOAc}$ , 90:10, CAM). The oxidation was quenched by the addition of sat. aq. sodium thiosulfate ( $\text{Na}_2\text{S}_2\text{O}_3$ ) solution (25 mL) and was stirred for 30 min at  $25^{\circ}\text{C}$ . The mixture was transferred to a separatory funnel and extracted with diethyl ether (4 x 50 mL). The combined organic phases were washed with sat. aq. sodium thiosulfate ( $\text{Na}_2\text{S}_2\text{O}_3$ ) solution (25 mL), dried over magnesium sulfate, filtered, and

concentrated (30 °C, 50 mmHg) to afford crude **7ai**. The product was purified by chromatography (silica gel, 3 x 20 cm, dry load on Celite, 25-mL fractions, hexanes/EtOAc gradient elution: 97:3 (600 mL) to 94:6 (600 mL)) to afford 305.3 mg (84% yield) of **7ai** as an oil. The product was purified to analytical standard by diffusion pump Kugelrohr distillation (160 °C ABT,  $4.0 \times 10^{-5}$  mmHg) to afford 300.1 mg (83%) of **7ai** as a viscous oil.

Data for (1*S*,2*S*)-(-)-**7ai**:

b.p.: 160 °C (ABT,  $4.0 \times 10^{-5}$  mmHg)

<sup>1</sup>H NMR: (500 MHz, CDCl<sub>3</sub>)

7.61 – 7.57 (m, 2H, HC(11)), 7.40 – 7.33 (m, 3H, HC(12) and HC(13)), 7.19 – 7.10 (m, 3H, HC(16) and HC(17)), 7.04 (t,  $J = 7.6$  Hz, 1H, HC(8)), 6.92 (d,  $J = 7.6$  Hz, 2H, HC(7)), 6.89 – 6.86 (m, 2H, HC(15)), 4.92 (d,  $J = 10.5$  Hz, 1H, HC(1)), 3.47 (td,  $J = 10.8, 2.9$  Hz, 1H, HC(2)), 3.30 (s, 1H, OH), 2.91 (ddd,  $J = 14.0, 7.9, 4.4$  Hz, 1H, H<sub>2</sub>C(4)), 2.69 (dt,  $J = 14.0, 8.4$  Hz, 1H, H<sub>2</sub>C(4)), 2.19 (s, 6H, H<sub>3</sub>C(9)), 1.58 (dddd,  $J = 14.1, 10.9, 7.8, 4.5$  Hz, 1H, H<sub>2</sub>C(3)), 1.49 (dtd,  $J = 14.2, 8.7, 2.9$  Hz, 1H, H<sub>2</sub>C(3)).

<sup>13</sup>C NMR: (126 MHz, CDCl<sub>3</sub>)

141.0 (C(14)), 137.3 (C(6)), 135.7 (C(5)), 134.4 (C(11)), 132.1 (C(10)), 129.2 (C(12)), 128.6 (C(15)), 128.4 (C(16)), 128.3 (C(13)), 127.7 (C(8)), 126.1 (C(17)), 72.3 (C(1)), 55.8 (C(2)), 32.9 (C(4)), 31.6 (C(3)), 21.0 (C(9)).

IR: (neat)

3465 (w), 3060 (w), 3024 (w), 2933 (w), 2857 (w), 1582 (w), 1495 (w), 1472 (w), 1453 (w), 1438 (w), 1376 (w), 1347 (w), 1302 (w), 1175 (w), 1088 (w), 1069 (w), 1043 (w), 1024 (w), 981 (w), 911 (w), 819 (w), 770 (m), 743 (m), 695 (m), 610. (w), 571 (w), 546 (w), 508 (w).

LRMS: (ESI, [M+Na]<sup>+</sup>)

216.9 (10), 385.2 (100).

HRMS: calcd for C<sub>24</sub>H<sub>26</sub>OSNa ([M+Na]<sup>+</sup>): 385.1602, found: 385.1596

Analysis: C<sub>24</sub>H<sub>26</sub>OS (362.53)

Calcd: C, 79.51; H, 7.23%

Found: C, 79.55; H, 7.52%

TLC:  $R_f$  0.55 (hexanes/EtOAc, 83:17, CAM)

**HPLC:** (1*R*,2*R*)-**7ai**  $t_R$  14.2 min (1%); (1*S*,2*S*)-**7ai**  $t_R$  19.8 min (99%) (Supelco Astec, hexanes/*i*-PrOH, 90:10, 0.5 mL/min, 220 nm, 24 °C)

**Opt. Rot.:**  $[\alpha]_D^{24}$  -87.1 ( $c = 1.26$  in 95% EtOH) (98% ee)

**Preparation of (1*S*,2*S*)-(-)-4-Phenyl-2-(phenylthio)-1-(*o*-tolyl)butan-1-ol ((1*S*,2*S*)-(-)-**7aj**)**

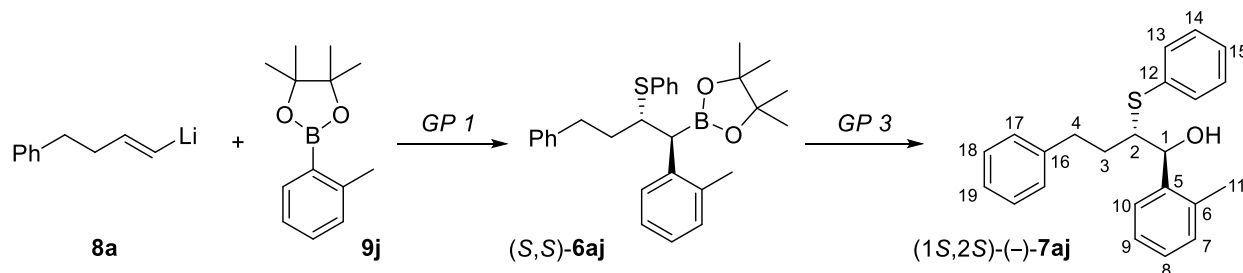

Alkylborane **6aj** was prepared according to *GP1c*. A flame-dried, 25-mL Schlenk flask (**A**) equipped with a magnetic stir bar, septum, and digital thermocouple probe was charged with (*E*)-(4-bromobut-3-en-1-yl)benzene (232.1 mg, 1.10 mmol, 1.10 equiv) and THF (5 mL). The resulting solution was cooled to -78 °C using a dry ice/isopropanol bath. A solution of *tert*-butyllithium in pentane (1.23 mL, 1.79 M, 2.20 equiv) was added dropwise over 10 min. The resulting solution of (*E*)-(4-phenylbut-1-en-1-yl)lithium **8a** was stirred at -78 °C for 30 min. Then, a solution of (*o*-tolyl)pinacolboronic ester **9j** (218.1 mg, 1.0 mmol, 1.0 equiv) in THF (5 mL) was added dropwise to flask **A** over 15 min. The resulting solution of **3aj** was stirred at -78 °C for 1 h. A separate, flame-dried, 50-mL Schlenk flask (**B**) equipped with a stir bar was charged with chiral catalyst (*S*)-**5** (52.1 mg, 0.10 mmol, 0.10 equiv) and brought into the glove box. To the flask was added *N*-(phenylthio)saccharin **4a** (350.0 mg, 1.20 mmol, 1.20 equiv). The flask was sealed with a septum and removed from the glove box. Absolute ethanol (5 mL) was added to flask **B**, and the resulting yellow suspension was sonicated under argon for 10 min. Flask **B** was equipped with a digital thermocouple probe and cooled to an internal temperature of -60 °C using a Cryo-Cool. Flask **A**, having been stirred for 1 h at -78 °C, was placed under vacuum (0.01 mmHg) and the cold bath was removed. The solution was stirred rapidly under vacuum for 30 min until all of the THF was removed. The resulting foam solid boronate complex **3aj** in flask **A** was taken up in ethanol (2.5 mL) at 25 °C, and the resulting solution was added dropwise via syringe to flask **B** over 10 min. A white suspension resulted. An additional portion of ethanol (2.5 mL) was added to flask **A** and then transferred to flask **B** as just described, to ensure complete transfer of the boronate. Flask **B** was stirred at -60 °C for 24 h. The reaction was quenched by the addition of sat. aq. NH<sub>4</sub>Cl (1

mL). The flask was removed from the cold bath and the biphasic mixture was allowed to warm to 25 °C and stirred rapidly for 15 min. The biphasic mixture was transferred to a 250-mL round bottom flask (using Et<sub>2</sub>O to transfer) and volatile components were removed by rotary evaporation (30 °C, 50 mmHg). The residue was transferred to a separatory funnel with Et<sub>2</sub>O (50 mL) and sat. aq. NaHCO<sub>3</sub> (25 mL), and the layers were separated. The aqueous layer was extracted with diethyl ether (3 x 50 mL), and the combined organic layers were dried over magnesium sulfate, filtered, and concentrated (30 °C, 50 mmHg) to afford crude alkylborane **6aj**.

Borane **6aj** was oxidized to alcohol **7aj** according to *GP3*. A 100-mL, round-bottomed flask equipped with a stir bar was charged with crude **6aj** and THF (10 mL). The turbid solution was cooled to 0 °C with an ice bath. To this solution was added a mixture of 30% aq. H<sub>2</sub>O<sub>2</sub> (1 mL) and 3 M aq. NaOH (1 mL) also containing EDTA (1.0 mg/mL). The biphasic mixture was stirred rapidly at 0 °C for 30 min. Full conversion was observed by TLC (hexanes/EtOAc, 90:10, CAM). The oxidation was quenched by the addition of sat. aq. sodium thiosulfate (Na<sub>2</sub>S<sub>2</sub>O<sub>3</sub>) solution (25 mL) and was stirred for 30 min at 25 °C. The mixture was transferred to a separatory funnel and extracted with diethyl ether (4 x 50 mL). The combined organic phases were washed with sat. aq. sodium thiosulfate (Na<sub>2</sub>S<sub>2</sub>O<sub>3</sub>) solution (25 mL), dried over magnesium sulfate, filtered, and concentrated (30 °C, 50 mmHg) to afford crude **7aj**. The product was purified by chromatography (silica gel, 3 x 20 cm, dry load on Celite, 25-mL fractions, hexanes/EtOAc gradient elution: 95:5 (600 mL) to 90:10 (600 mL)) to afford 298.2 mg (85% yield) of **7aj** as an oil. The product was purified to analytical standard by diffusion pump Kugelrohr distillation (160 °C ABT, 4.0 x 10<sup>-5</sup> mmHg) to afford 293.2 mg (84%) of **7aj** as a viscous oil.

Data for (1*S*,2*S*)-(-)-**7aj**:

b.p.: 160 °C (ABT, 4.0 x 10<sup>-5</sup> mmHg)

<sup>1</sup>H NMR: (500 MHz, CDCl<sub>3</sub>)

7.44 (dd, *J* = 7.3, 2.2 Hz, 2H, HC(13)), 7.34 – 7.27 (m, 4H, HC(10) and HC(14) and HC(19)), 7.23 – 7.12 (m, 5H, HC(8) and HC(9) and HC(15) and HC(18)), 7.10 – 7.08 (m, 1H, HC(7)), 6.95 (d, *J* = 6.9 Hz, 2H, HC(17)), 4.78 (dd, *J* = 8.5, 2.4 Hz, 1H, HC(1)), 3.33 (d, *J* = 2.4 Hz, 1H, OH), 3.26 – 3.15 (m, 1H, HC(2)), 2.97 (dt, *J* = 13.7, 6.8 Hz, 1H, H<sub>2</sub>C(4)), 2.68 (dt, *J* = 14.0, 8.3 Hz, 1H, H<sub>2</sub>C(4)), 2.20 (s, 3H, H<sub>3</sub>C(11)), 1.78 – 1.65 (m, 2H, H<sub>2</sub>C(3)).

<sup>13</sup>C NMR: (126 MHz, CDCl<sub>3</sub>)

141.1 (C(16)), 139.2 (C(6)), 135.8 (C(5)), 133.3 (C(13)), 133.2 (C(12)), 130.6 (C(7)), 129.1 (C(14)), 128.6 (C(18)), 128.4 (C(17)), 127.8 (C(15)), 127.8 (C(8)), 126.8 (C(10)), 126.4 (C(9)), 126.1 (C(19)), 72.2 (C(1)), 58.4 (C(2)), 33.2 (C(4)), 32.6 (C(3)), 19.5 (C(11)).

IR: (neat)

3436 (w), 3059 (w), 3024 (w), 2929 (w), 1740 (w), 1602 (w), 1582 (w), 1495 (w), 1479 (w), 1454 (w), 1438 (w), 1377 (w), 1350 (w), 1303 (w), 1178 (w), 1114 (w), 1048 (w), 1024 (w), 1000 (w), 984 (w), 944 (w), 910 (w), 830 (w), 743 (m), 728 (m), 695 (m), 610 (w), 561 (w), 488 (w).

LRMS: (ESI,  $[M+Na]^+$ )

105.1 (18), 129.1 (18), 221.1 (100), 239.1 (21), 331.2 (23), 371.1 (20).

HRMS: calcd for  $C_{23}H_{24}OSNa$  ( $[M+Na]^+$ ): 371.1446, found: 371.1429

Analysis:  $C_{23}H_{24}OS$  (348.50)

Calcd: C, 79.27; H, 6.94%

Found: C, 79.10; H, 6.82%

TLC:  $R_f$  0.43 (hexanes/EtOAc, 83:17, CAM)

HPLC: (1*S*,2*S*)-**7aj**  $t_R$  13.6 min (98%); (1*R*,2*R*)-**7aj**  $t_R$  17.8 min (2%) (Regis (*R,R*)-Whelk O1, hexanes/*i*-PrOH, 90:10, 0.5 mL/min, 220 nm, 24 °C)

Opt. Rot.:  $[\alpha]_D^{24}$  -84.6 ( $c = 1.53$  in 100% EtOH) (96% ee)

**Preparation of (1*S*,2*S*)-(-)-1-(Naphthalen-2-yl)-4-phenyl-2-(phenylthio)butan-1-ol ((1*S*,2*S*)-(-)-**7ak**)**

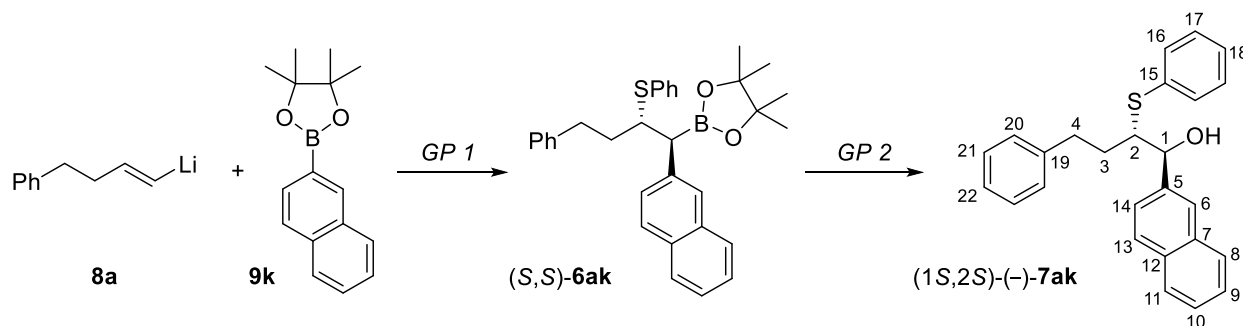

Alkylborane **6ak** was prepared according to *GP1c*. A flame-dried, 25-mL Schlenk flask (**A**) equipped with a magnetic stir bar, septum, and digital thermocouple probe was charged with (*E*)-(4-bromobut-3-en-1-yl)benzene (232.1 mg, 1.10 mmol, 1.10 equiv) and THF (5 mL). The resulting solution was cooled to  $-78\text{ }^{\circ}\text{C}$  using a dry ice/isopropanol bath. A solution of *tert*-butyllithium in pentane (1.23 mL, 1.79 M, 2.20 equiv) was added dropwise over 10 min. The resulting solution of (*E*)-(4-phenylbut-1-en-1-yl)lithium **8a** was stirred at  $-78\text{ }^{\circ}\text{C}$  for 30 min. Then, a solution of (naphthalen-2-yl)pinacolboronic ester **9k** (254.1 mg, 1.0 mmol, 1.0 equiv) in THF (5 mL) was added dropwise to flask **A** over 15 min. The resulting solution of **3ak** was stirred at  $-78\text{ }^{\circ}\text{C}$  for 1 h. A separate, flame-dried, 50-mL Schlenk flask (**B**) equipped with a stir bar was charged with chiral catalyst (*S*)-**5** (52.1 mg, 0.10 mmol, 0.10 equiv) and brought into the glove box. To the flask was added *N*-(phenylthio)saccharin **4a** (350.0 mg, 1.20 mmol, 1.20 equiv). The flask was sealed with a septum and removed from the glove box. Absolute ethanol (5 mL) was added to flask **B**, and the resulting yellow suspension was sonicated under argon for 10 min. Flask **B** was equipped with a digital thermocouple probe and cooled to an internal temperature of  $-60\text{ }^{\circ}\text{C}$  using a Cryo-Cool. Flask **A**, having been stirred for 1 h at  $-78\text{ }^{\circ}\text{C}$ , was placed under vacuum (0.01 mmHg) and the cold bath was removed. The solution was stirred rapidly under vacuum for 30 min until all of the THF was removed. The resulting foam solid boronate complex **3ak** in flask **A** was taken up in ethanol (2.5 mL) at  $25\text{ }^{\circ}\text{C}$ , and the resulting solution was added dropwise via syringe to flask **B** over 10 min. A white suspension resulted. An additional portion of ethanol (2.5 mL) was added to flask **A** and then transferred to flask **B** as just described, to ensure complete transfer of the boronate. Flask **B** was stirred at  $-60\text{ }^{\circ}\text{C}$  for 24 h. The reaction was quenched by the addition of sat. aq.  $\text{NH}_4\text{Cl}$  (1 mL). The flask was removed from the cold bath and the biphasic mixture was allowed to warm to  $25\text{ }^{\circ}\text{C}$  and stirred rapidly for 15 min. The biphasic mixture was transferred to

a 250-mL round bottom flask (using Et<sub>2</sub>O to transfer) and volatile components were removed by rotary evaporation (30 °C, 50 mmHg). The residue was transferred to a separatory funnel with Et<sub>2</sub>O (50 mL) and sat. aq. NaHCO<sub>3</sub> (25 mL), and the layers were separated. The aqueous layer was extracted with diethyl ether (3 x 50 mL), and the combined organic layers were dried over magnesium sulfate, filtered, and concentrated (30 °C, 50 mmHg) to afford crude alkylborane **6ak**.

Borane **6ak** was oxidized to alcohol **7ak** according to GP2. A 100-mL, round-bottomed flask equipped with a stir bar was charged with crude **6ak**, THF (10 mL) and water (10 mL). Sodium perborate tetrahydrate (616 mg, 4.0 mmol) was added to the rapidly stirred biphasic mixture at 25 °C. The mixture was stirred rapidly for 3 h. Full conversion was observed by TLC (hexanes/EtOAc, 90:10, CAM). The oxidation was quenched by the addition of sat. aq. sodium thiosulfate (Na<sub>2</sub>S<sub>2</sub>O<sub>3</sub>) solution (25 mL) and was stirred for 30 min at 25 °C. The mixture was transferred to a separatory funnel and extracted with diethyl ether (4 x 50 mL). The combined organic phases were washed with sat. aq. sodium thiosulfate (Na<sub>2</sub>S<sub>2</sub>O<sub>3</sub>) solution (25 mL), dried over magnesium sulfate, filtered, and concentrated (30 °C, 50 mmHg) to afford crude **7ak**. The product was purified by chromatography (silica gel, 3 x 20 cm, dry load on Celite, 25-mL fractions, hexanes/EtOAc gradient elution: 95:5 (600 mL) to 90:10 (600 mL)) to afford 316.9 mg (82% yield) of **7ak** as an oil. The product was purified to an analytical standard by diffusion pump Kugelrohr distillation (160 °C ABT, 4.0 x 10<sup>-5</sup> mmHg) to afford 310.8 mg (81%) of **7ak** as a viscous oil.

Data for (1*S*,2*S*)-(-)-**7ak**:

b.p.: 160 °C (ABT, 4.0 x 10<sup>-5</sup> mmHg)

<sup>1</sup>H NMR: (500 MHz, CDCl<sub>3</sub>)

7.82 (dd, *J* = 6.0, 3.4 Hz, 1H, HC(11)), 7.80 – 7.76 (m, 2H, HC(8) and HC(13)), 7.72 (s, 1H, HC(6)), 7.53 – 7.50 (m, 2H, HC(16)), 7.48 (dt, *J* = 6.3, 3.4 Hz, 2H, HC(9) and HC(10)), 7.38 (dd, *J* = 8.5, 1.3 Hz, 1H, HC(14)), 7.31 (dd, *J* = 5.1, 2.0 Hz, 3H, HC(17) and HC(18)), 7.19 – 7.10 (m, 3H, HC(21) and HC(22)), 6.93 (d, *J* = 6.6 Hz, 2H, HC(20)), 4.63 (dd, *J* = 8.5, 1.8 Hz, 1H, HC(1)), 3.54 (d, *J* = 1.9 Hz, 1H, OH), 3.26 (td, *J* = 10.0, 3.5 Hz, 1H, HC(2)), 2.98 (ddd, *J* = 14.0, 9.3, 4.8 Hz, 1H, H<sub>2</sub>C(4)), 2.71 – 2.63 (m, 1H, H<sub>2</sub>C(4)), 1.76 (dddd, *J* = 12.8, 9.7, 7.5, 3.5 Hz, 1H, H<sub>2</sub>C(3)), 1.64 (dtd, *J* = 14.5, 9.7, 4.8 Hz, 1H, H<sub>2</sub>C(3)).

<sup>13</sup>C NMR: (126 MHz, CDCl<sub>3</sub>)

141.2 (C(19)), 138.4 (C(5)), 133.7 (C(16)), 133.4 (C(12)), 133.3 (C(7)), 132.7

(C(5)), 129.2 (C(17)), 128.6 (C(20)), 128.4 (C(21)), 128.4 (C(8)), 128.1 (C(11)), 128.0 (C(18)), 127.8 (C(13)), 126.7 (C(6)), 126.2 (C(9)), 126.1 (C(10)), 126.0 (C(22)), 124.7 (C(14)), 75.9(C(1)), 58.5 (C(2)), 33.2(C(4)), 32.4(C(3)).

IR: (neat)

3432 (w), 3056 (w), 3024 (w), 2928 (w), 2857 (w), 1947 (w), 1805 (w), 1601 (w), 1582 (w), 1508 (w), 1495 (w), 1479 (w), 1453 (w), 1438 (w), 1352 (w), 1270 (w), 1241 (w), 1162 (w), 1122 (w), 1086 (w), 1068 (w), 1025 (w), 1000 (w), 987 (w), 950 (w), 896 (w), 858 (w), 819 (w), 772 (w), 744 (m), 696 (m), 608 (w), 570 (w), 478 (m).

LRMS: (ESI, [M+Na]<sup>+</sup>)

129.1 (17), 141.1 (21), 239.1 (12), 257.1 (100), 367.2 (14), 407.1 (53).

HRMS: calcd for C<sub>26</sub>H<sub>24</sub>OSNa ([M+Na]<sup>+</sup>): 407.1446, found: 407.1448

Analysis: C<sub>26</sub>H<sub>24</sub>OS (384.54)

Calcd: C, 81.21; H, 6.29%

Found: C, 81.21; H, 6.23%

TLC: *R<sub>f</sub>* 0.36 (hexanes/EtOAc, 83:17, CAM)

HPLC: (1*S*,2*S*)-**7ak** *t<sub>R</sub>* 23.0 min (98%); (1*R*,2*R*)-**7ak** *t<sub>R</sub>* 29.1 min (2%) (Regis (*R,R*)-Whelk O1, hexanes/*i*-PrOH, 80:20, 0.5 mL/min, 220 nm, 24 °C)

Opt. Rot.: [ $\alpha$ ]<sub>D</sub><sup>24</sup> -95.4 (*c* = 1.13 in 100% EtOH) (96% ee)

**Preparation of (1*S*,2*S*)-(-)-4-Phenyl-2-(phenylthio)-1-(1-tosyl-1*H*-indol-5-yl)butan-1-ol ((1*S*,2*S*)-(-)-**7al**)**

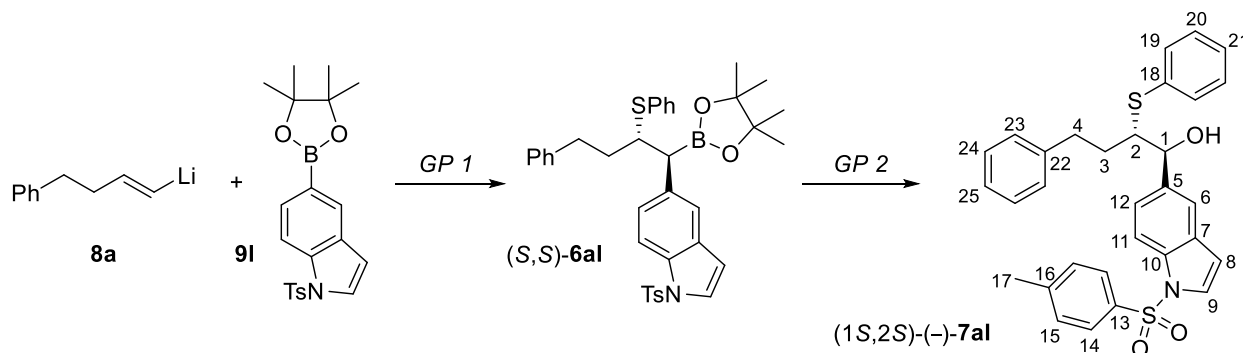

Alkylborane **6al** was prepared according to *GP1c*. A flame-dried, 25-mL Schlenk flask (**A**) equipped with a magnetic stir bar, septum, and digital thermocouple probe was charged with (*E*)-(4-bromobut-3-en-1-yl)benzene (232.1 mg, 1.10 mmol, 1.10 equiv) and THF (5 mL). The resulting solution was cooled to  $-78\text{ }^{\circ}\text{C}$  using a dry ice/isopropanol bath. A solution of *tert*-butyllithium in pentane (1.27 mL, 1.73 M, 2.20 equiv) was added dropwise over 10 min. The resulting solution of (*E*)-(4-phenylbut-1-en-1-yl)lithium **8a** was stirred at  $-78\text{ }^{\circ}\text{C}$  for 30 min. Then, a solution of 5-(pinacolboryl)-1-tosyl-1*H* indole **9l** (397.2 mg, 1.0 mmol, 1.0 equiv) in THF (5 mL) was added dropwise to flask **A** over 15 min. The resulting solution of **3al** was stirred at  $-78\text{ }^{\circ}\text{C}$  for 1 h. A separate, flame-dried, 50-mL Schlenk flask (**B**) equipped with a stir bar was charged with chiral catalyst (*S*)-**5** (52.1 mg, 0.10 mmol, 0.10 equiv) and brought into the glove box. To the flask was added *N*-(phenylthio)saccharin **4a** (350.0 mg, 1.20 mmol, 1.20 equiv). The flask was sealed with a septum and removed from the glove box. Absolute ethanol (5 mL) was added to flask **B**, and the resulting yellow suspension was sonicated under argon for 10 min. Flask **B** was equipped with a digital thermocouple probe and cooled to an internal temperature of  $-60\text{ }^{\circ}\text{C}$  using a Cryo-Cool. Flask **A**, having been stirred for 1 h at  $-78\text{ }^{\circ}\text{C}$ , was placed under vacuum (0.01 mmHg) and the cold bath was removed. The solution was stirred rapidly under vacuum for 30 min until all of the THF was removed. The resulting foam solid boronate complex **3al** in flask **A** was taken up in ethanol (2.5 mL) at  $25\text{ }^{\circ}\text{C}$ , and the resulting solution was added dropwise via syringe to flask **B** over 10 min at  $-60\text{ }^{\circ}\text{C}$ . A white suspension resulted. An additional portion of ethanol (2.5 mL) was added to flask **A** and then transferred to flask **B** as just described, to ensure complete transfer of the boronate. Flask **B** was stirred at  $-60\text{ }^{\circ}\text{C}$  for 24 h. The reaction was quenched by the addition of

sat. aq.  $\text{NH}_4\text{Cl}$  (1 mL). The flask was removed from the cold bath and the biphasic mixture was allowed to warm to 25 °C and stirred rapidly for 15 min. The biphasic mixture was transferred to a 250-mL round bottom flask (using  $\text{Et}_2\text{O}$  to transfer) and volatile components were removed by rotary evaporation (30 °C, 50 mmHg). The residue was transferred to a separatory funnel with  $\text{Et}_2\text{O}$  (50 mL) and sat. aq.  $\text{NaHCO}_3$  (25 mL), and the layers were separated. The aqueous layer was extracted with  $\text{Et}_2\text{O}$  (3 x 50 mL), and the combined organic layers were dried over magnesium sulfate, filtered, and concentrated (30 °C, 50 mmHg) to afford crude alkylborane **6al**.

Borane **6al** was oxidized to alcohol **7al** according to GP2. A 100-mL, round-bottomed flask equipped with a stir bar was charged with crude **6al**, THF (10 mL) and water (10 mL). Sodium perborate tetrahydrate (616 mg, 4.0 mmol) was added to the rapidly stirred biphasic mixture at 25 °C. The mixture was stirred rapidly for 3 h. Full conversion was observed by TLC (hexanes/ $\text{EtOAc}$ , 75:25, CAM). The oxidation was quenched by the addition of sat. aq. sodium thiosulfate ( $\text{Na}_2\text{S}_2\text{O}_3$ ) solution (25 mL) and was stirred for 30 min at 25 °C. The mixture was transferred to a separatory funnel and extracted with  $\text{Et}_2\text{O}$  (4 x 50 mL). The combined organic phases were washed with sat. aq. sodium thiosulfate ( $\text{Na}_2\text{S}_2\text{O}_3$ ) solution (25 mL), dried over magnesium sulfate, filtered, and concentrated (30 °C, 50 mmHg) to afford crude **7al**. The product was purified by chromatography (silica gel, 3 x 20 cm, wet load with  $\text{CH}_2\text{Cl}_2$ , 25-mL fractions, hexanes/ $\text{EtOAc}$  gradient elution: 90:10 to 87.5:12.5) to afford 297.8 mg (56% yield) of **7al** as an oil. The oil was triturated with hexanes and dried under vacuum to afford 287.7 mg (55% yield) of analytically pure **7al** as a white, foam solid.

Data for (1*S*,2*S*)-(-)-**7al**:

m.p.: 41–45 °C (hexanes)

$^1\text{H}$  NMR: (500 MHz,  $\text{CDCl}_3$ )

7.90 (d,  $J$  = 8.5 Hz, 1H, HC(11)), 7.73 (d,  $J$  = 8.5 Hz, 2H, HC(14)), 7.54 (d,  $J$  = 3.7 Hz, 1H, HC(9)), 7.49 – 7.44 (m, 2H, HC(19)), 7.41 – 7.38 (m, 1H, HC(6)), 7.30 – 7.26 (m, 3H, HC(20) and HC(21)), 7.22 – 7.17 (m, 3H, HC(15) and HC(12)), 7.16 – 7.10 (m, 3H, HC(24) and HC(25)), 6.91 – 6.85 (m, 2H, HC(23)), 6.58 (d,  $J$  = 3.6 Hz, 1H, HC(8)), 4.50 (d,  $J$  = 8.7 Hz, 1H, HC(1)), 3.60 – 3.35 (bm, 1H, OH), 3.15 (ddd,  $J$  = 9.9, 8.7, 3.5 Hz, 1H, HC(2)), 2.91 (ddd,  $J$  = 13.9, 9.1, 4.8 Hz, 1H,  $\text{H}_2\text{C}(4)$ ), 2.61 (ddd,  $J$  = 13.8, 9.0, 7.5 Hz, 1H,  $\text{H}_2\text{C}(4)$ ), 2.32 (s, 3H,  $\text{H}_3\text{C}(17)$ ), 1.71 – 1.63 (m, 1H,  $\text{H}_2\text{C}(3)$ ), 1.62 – 1.54 (m, 1H,  $\text{H}_2\text{C}(3)$ ).

$^{13}\text{C}$  NMR: (126 MHz,  $\text{CDCl}_3$ )

145.1 (C(16)), 141.1 (C(22)), 136.1 (C(5)), 135.4 (C(13)), 134.8 (C(10)), 133.6 (HC(19)), 132.7 (C(18)), 131.0 (C(7)), 130.0 (HC(15)), 129.2 (HC(20)), 128.5 (HC(23)), 128.4 (HC(24)), 128.0 (HC(21)), 127.0 (HC(9)), 126.9 (HC(14)), 126.1 (HC(25)), 123.8 (HC(12)), 120.3 (HC(6)), 113.7 (HC(11)), 109.3 (HC(8)), 75.8 (HC(1)), 58.8 (HC(2)), 33.1 ( $\text{H}_2\text{C}(4)$ ), 32.3 ( $\text{H}_2\text{C}(3)$ ), 21.7 ( $\text{H}_3\text{C}(17)$ ).

IR: (neat)

3024 (w), 1740 (w), 1596 (w), 1494 (w), 1449 (w), 1367 (w), 1271 (w), 1217 (w), 1187 (w), 1169 (w), 1139 (w), 1121 (w), 1091 (w), 1025 (w), 994 (w), 890 (w), 811 (w), 727 (w), 700 (w), 670 (w), 578 (w), 537 (w).

LRMS: (ESI,  $[\text{M}+\text{Na}]^+$ )

129.1 (10), 239.1 (24), 400.1 (100), 510.2 (12), 550.1 (33).

HRMS: calcd for  $\text{C}_{31}\text{H}_{29}\text{NO}_3\text{S}_2\text{Na}$  ( $[\text{M}+\text{Na}]^+$ ): 550.1487, found: 550.1475

Analysis:  $\text{C}_{31}\text{H}_{29}\text{NO}_3\text{S}_2$  (527.70)

Calcd: C, 70.56; H, 5.54%; N, 2.65%

Found: C, 70.21; H, 5.51%; N, 2.78%

TLC:  $R_f$  0.25 (hexanes/EtOAc, 80:20, CAM)

HPLC: (1*S*,2*S*)-**7al**  $t_R$  22.1 min (98%); (1*R*,2*R*)-**7al**  $t_R$  27.2 min (2%) (Supelco Astec, hexanes/*i*-PrOH, 80:20, 1.0 mL/min, 220 nm, 24 °C)

Opt. Rot.:  $[\alpha]_D^{24} -60.8$  ( $c = 1.11$  in 100% EtOH) (96% ee)

**Preparation of (1*S*,2*S*)-(-)-1-(3-Bromophenyl)-4-phenyl-2-(phenylthio)butan-1-ol ((1*S*,2*S*)-(-)-**7am**)**

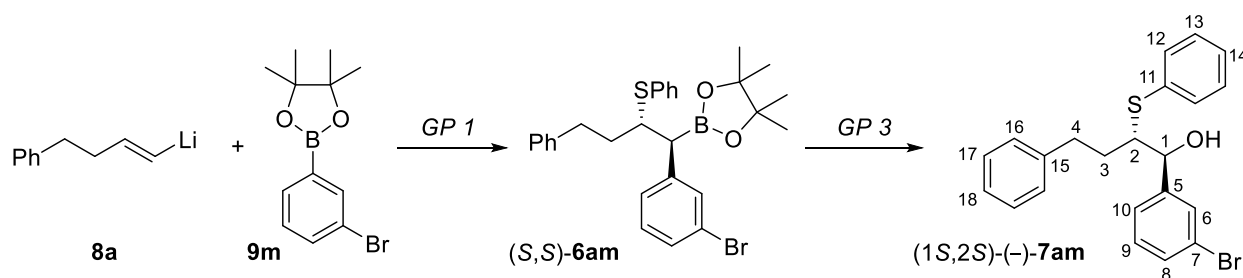

Alkylborane **6am** was prepared according to *GP1c*. A flame-dried, 25-mL Schlenk flask (**A**) equipped with a magnetic stir bar, septum, and digital thermocouple probe was charged with

(*E*)-(4-bromobut-3-en-1-yl)benzene (232.1 mg, 1.10 mmol, 1.10 equiv) and THF (5 mL). The resulting solution was cooled to  $-78\text{ }^{\circ}\text{C}$  using a dry ice/isopropanol bath. A solution of *tert*-butyllithium in pentane (1.23 mL, 1.79 M, 2.20 equiv) was added dropwise over 10 min. The resulting solution of (*E*)-(4-phenylbut-1-en-1-yl)lithium **8a** was stirred at  $-78\text{ }^{\circ}\text{C}$  for 30 min. Then, a solution of (3-bromophenyl)pinacolboronic ester **9m** (283.0 mg, 1.0 mmol, 1.0 equiv) in THF (5 mL) was added dropwise to flask **A** over 15 min. The resulting solution of **3am** was stirred at  $-78\text{ }^{\circ}\text{C}$  for 1 h. A separate, flame-dried, 50-mL Schlenk flask (**B**) equipped with a stir bar was charged with chiral catalyst (*S*)-**5** (52.1 mg, 0.10 mmol, 0.10 equiv) and brought into the glove box. To the flask was added *N*-(phenylthio)saccharin **4a** (350.0 mg, 1.20 mmol, 1.20 equiv). The flask was sealed with a septum and removed from the glove box. Absolute ethanol (5 mL) was added to flask **B**, and the resulting yellow suspension was sonicated under argon for 10 min. Flask **B** was equipped with a digital thermocouple probe and cooled to an internal temperature of  $-60\text{ }^{\circ}\text{C}$  using a Cryo-Cool. Flask **A**, having been stirred for 1 h at  $-78\text{ }^{\circ}\text{C}$ , was placed under vacuum (0.01 mmHg) and the cold bath was removed. The solution was stirred rapidly under vacuum for 30 min until all of the THF was removed. The resulting foam solid boronate complex **3am** in flask **A** was taken up in ethanol (2.5 mL) at  $25\text{ }^{\circ}\text{C}$ , and the resulting solution was added dropwise via syringe to flask **B** over 10 min. A white suspension resulted. An additional portion of ethanol (2.5 mL) was added to flask **A** and then transferred to flask **B** as just described, to ensure complete transfer of the boronate. Flask **B** was stirred at  $-60\text{ }^{\circ}\text{C}$  for 24 h. The reaction was quenched by the addition of sat. aq.  $\text{NH}_4\text{Cl}$  (1 mL). The flask was removed from the cold bath and the biphasic mixture was allowed to warm to  $25\text{ }^{\circ}\text{C}$  and stirred rapidly for 15 min. The biphasic mixture was transferred to a 250-mL round bottom flask (using  $\text{Et}_2\text{O}$  to transfer) and volatile components were removed by rotary evaporation ( $30\text{ }^{\circ}\text{C}$ , 50 mmHg). The residue was transferred to a separatory funnel with  $\text{Et}_2\text{O}$  (50 mL) and sat. aq.  $\text{NaHCO}_3$  (25 mL), and the layers were separated. The aqueous layer was extracted with diethyl ether (3 x 50 mL), and the combined organic layers were dried over magnesium sulfate, filtered, and concentrated ( $30\text{ }^{\circ}\text{C}$ , 50 mmHg) to afford crude alkylborane **6am**.

Borane **6am** was oxidized to alcohol **7am** according to GP3. A 100-mL, round-bottomed flask equipped with a stir bar was charged with crude **6am** and THF (10 mL). The turbid solution was cooled to  $0\text{ }^{\circ}\text{C}$  with an ice bath. To this solution was added a mixture of 30% aq.  $\text{H}_2\text{O}_2$  (1 mL) and 3 M aq.  $\text{NaOH}$  (1 mL) also containing EDTA (1.0 mg/mL). The biphasic mixture was stirred rapidly at  $0\text{ }^{\circ}\text{C}$  for 30 min. Full conversion was observed by TLC (hexanes/ $\text{EtOAc}$ , 90:10, CAM).

The oxidation was quenched by the addition of sat. aq. sodium thiosulfate ( $\text{Na}_2\text{S}_2\text{O}_3$ ) solution (25 mL) and was stirred for 30 min at 25 °C. The mixture was transferred to a separatory funnel and extracted with diethyl ether (4 x 50 mL). The combined organic phases were washed with sat. aq. sodium thiosulfate ( $\text{Na}_2\text{S}_2\text{O}_3$ ) solution (25 mL), dried over magnesium sulfate, filtered, and concentrated (30 °C, 50 mmHg) to afford crude **7am**. The product was purified by chromatography (silica gel, 3 x 20 cm, dry load on Celite, 25-mL fractions, hexanes/EtOAc gradient elution: 95:5 (600 mL) to 90:10 (600 mL)) to afford 366.6 mg (88% yield) of **7am** as an oil. The product was purified to analytical standard by diffusion pump Kugelrohr distillation (160 °C ABT,  $4.0 \times 10^{-5}$  mmHg) to afford 351.7 mg (85%) of **7am** as a viscous oil.

Data for (1*S*,2*S*)-(-)-**7am**:

b.p.: 160 °C (ABT,  $4.0 \times 10^{-5}$  mmHg)

$^1\text{H}$  NMR: (500 MHz,  $\text{CDCl}_3$ )

7.45 (dd,  $J = 6.3, 2.8$  Hz, 2H, HC(12)), 7.42 (s, 1H, HC(6)), 7.39 (d,  $J = 6.7$  Hz, 1H, HC(8)), 7.31 (dd,  $J = 4.9, 1.5$  Hz, 3H, HC(13) and HC(14)), 7.22 (t,  $J = 7.4$  Hz, 2H, HC(17)), 7.16 (q,  $J = 7.0$  Hz, 3H, HC(9) and HC(10) and HC(18)), 6.99 (d,  $J = 7.3$  Hz, 2H, HC(16)), 4.43 (dd,  $J = 8.1, 1.9$  Hz, 1H, HC(1)), 3.42 (d,  $J = 2.4$  Hz, 1H, OH), 3.10 (ddd,  $J = 10.2, 8.1, 3.6$  Hz, 1H, HC(2)), 2.97 (ddd,  $J = 13.9, 9.1, 4.9$  Hz, 1H,  $\text{H}_2\text{C}(4)$ ), 2.69 (dt,  $J = 14.0, 8.3$  Hz, 1H,  $\text{H}_2\text{C}(4)$ ), 1.73 (ddt,  $J = 17.1, 8.7, 3.7$  Hz, 1H,  $\text{H}_2\text{C}(3)$ ), 1.62 (dtd,  $J = 14.2, 9.5, 4.8$  Hz, 1H,  $\text{H}_2\text{C}(3)$ ).

$^{13}\text{C}$  NMR: (126 MHz,  $\text{CDCl}_3$ )

143.4 (C(5)), 141.0 (C(15)), 133.6 (C(12)), 132.5 (C(11)), 131.3 (C(8)), 130.3 (C(6)), 130.0 (C(9)), 129.3 (C(13)), 128.6 (C(16)), 128.5 (C(17)), 128.1 (C(14)), 126.2 (C(10)), 126.0 (C(18)), 122.7 (C(7)), 75.1 (C(1)), 58.3 (C(2)), 33.1 (C(4)), 32.2 (C(3)).

IR: (neat)

3429 (w), 3059 (w), 3025 (w), 2923 (w), 2856 (w), 1740 (w), 1582 (w), 1570 (w), 1495 (w), 1474 (w), 1453 (w), 1437 (w), 1428 (w), 1375 (w), 1283 (w), 1185 (w), 1069 (w), 1025 (w), 997 (w), 884 (w), 784 (w), 740 (m), 693 (m), 621 (w), 562 (w), 488 (w).

LRMS: (ESI,  $[\text{M}+\text{Na}]^+$ )

169.0 (9), 287.0 (27), 357.1 (15), 407.1 (61), 437.0 (100).

**HRMS:** calcd for  $C_{22}H_{21}BrOSNa$  ( $[M+Na]^+$ ): 435.0394, found: 435.0383

**Analysis:**  $C_{22}H_{21}BrOS$  (413.37)

Calcd: C, 63.92; H, 5.12%

Found: C, 64.10; H, 5.05%

**TLC:**  $R_f$  0.40 (hexanes/EtOAc, 83:17, CAM)

**HPLC:** (1*R*,2*R*)-**7am**  $t_R$  22.5 min (3%); (1*S*,2*S*)-**7am**  $t_R$  25.2 min (97%) (Supelco Astec, hexanes/*i*-PrOH, 90:10, 0.5 mL/min, 220 nm, 24 °C)

**Opt. Rot.:**  $[\alpha]_D^{24} -76.5$  ( $c = 0.78$  in 100% EtOH) (94% ee)

**Preparation of methyl 4-((1*S*,2*S*)-(-)-1-Hydroxy-4-phenyl-2-(phenylthio)butyl)benzoate ((1*S*,2*S*)-(-)-**7an**)**

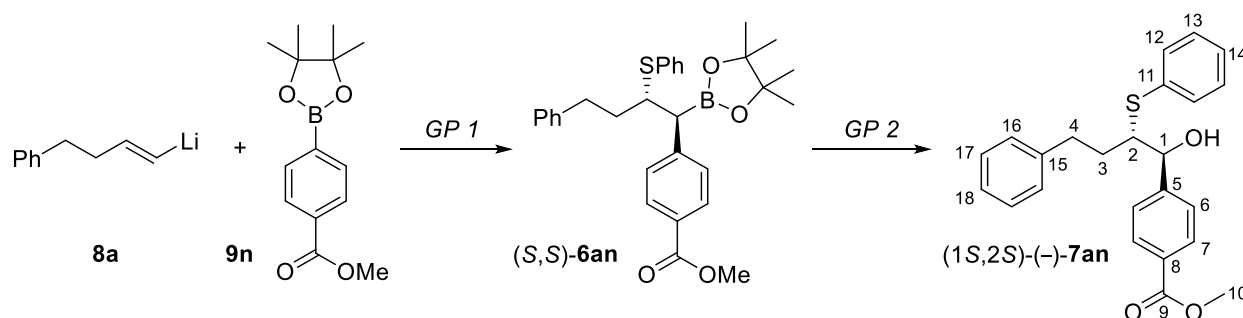

Alkylborane **6an** was prepared according to *GP1c*. A flame-dried, 25-mL Schlenk flask (**A**) equipped with a magnetic stir bar, septum, and digital thermocouple probe was charged with (*E*)-(4-bromobut-3-en-1-yl)benzene (464.2 mg, 2.20 mmol, 1.10 equiv) and THF (5 mL). The resulting solution was cooled to  $-78$  °C using a dry ice/isopropanol bath. A solution of *tert*-butyllithium in pentane (2.54 mL, 1.73 M, 2.20 equiv) was added dropwise over 10 min. The resulting solution of (*E*)-(4-phenylbut-1-en-1-yl)lithium **8a** was stirred at  $-78$  °C for 30 min. Then, a solution of methyl 4-(pinacolboron)benzoate **9n** (524.4 mg, 2.0 mmol, 1.0 equiv) in THF (5 mL) was added dropwise to flask **A** over 15 min. The resulting solution of **3an** was stirred at  $-78$  °C for 1 h. A separate, flame-dried, 50-mL Schlenk flask (**B**) equipped with a stir bar was charged with chiral catalyst (*S*)-**5** (104.0 mg, 0.20 mmol, 0.10 equiv) and brought into the glove box. To the flask was added *N*-(phenylthio)saccharin **4a** (700.0 mg, 2.40 mmol, 1.20 equiv). The flask was sealed with a septum and removed from the glove box. Absolute ethanol (10 mL) was added to flask **B**, and the resulting yellow suspension was sonicated under argon for 10 min. Flask **B** was equipped with a digital thermocouple probe and cooled to an internal temperature of  $-60$  °C using

a Cryo-Cool. Flask **A**, having been stirred for 1 h at  $-78\text{ }^{\circ}\text{C}$ , was placed under vacuum (0.01 mmHg) and the cold bath was removed. The solution was stirred rapidly under vacuum for 30 min until all of the THF was removed. The resulting foam solid boronate complex **3an** in flask **A** was taken up in ethanol (7.5 mL) at  $25\text{ }^{\circ}\text{C}$ , and the resulting solution was added dropwise via syringe to flask **B** over 10 min. A white suspension resulted. An additional portion of ethanol (2.5 mL) was added to flask **A** and then transferred to flask **B** as just described, to ensure complete transfer of the boronate. Flask **B** was stirred at  $-60\text{ }^{\circ}\text{C}$  for 24 h. The reaction was quenched by the addition of sat. aq.  $\text{NH}_4\text{Cl}$  (1 mL). The flask was removed from the cold bath and the biphasic mixture was allowed to warm to  $25\text{ }^{\circ}\text{C}$  and stirred rapidly for 15 min. The biphasic mixture was transferred to a 250-mL round bottom flask (using  $\text{Et}_2\text{O}$  to transfer) and volatile components were removed by rotary evaporation ( $30\text{ }^{\circ}\text{C}$ , 50 mmHg). The residue was transferred to a separatory funnel with  $\text{Et}_2\text{O}$  (50 mL) and sat. aq.  $\text{NaHCO}_3$  (25 mL), and the layers were separated. The aqueous layer was extracted with diethyl ether (3 x 50 mL), and the combined organic layers were dried over magnesium sulfate, filtered, and concentrated ( $30\text{ }^{\circ}\text{C}$ , 50 mmHg) to afford crude alkylborane **6an**.

Borane **6an** was oxidized to alcohol **7an** according to GP2. A 100-mL, round-bottomed flask equipped with a stir bar was charged with crude **6an**, THF (20 mL) and water (20 mL). Sodium perborate tetrahydrate (1.232 mg, 8.0 mmol) was added to the rapidly stirred biphasic mixture at  $25\text{ }^{\circ}\text{C}$ . The mixture was stirred rapidly for 3 h. Full conversion was observed by TLC (hexanes/ $\text{EtOAc}$ , 90:10, CAM). The oxidation was quenched by the addition of sat. aq. sodium thiosulfate ( $\text{Na}_2\text{S}_2\text{O}_3$ ) solution (25 mL) and was stirred for 30 min at  $25\text{ }^{\circ}\text{C}$ . The mixture was transferred to a separatory funnel and extracted with diethyl ether (4 x 50 mL). The combined organic phases were washed with sat. aq. sodium thiosulfate ( $\text{Na}_2\text{S}_2\text{O}_3$ ) solution (25 mL), dried over magnesium sulfate, filtered, and concentrated ( $30\text{ }^{\circ}\text{C}$ , 50 mmHg) to afford crude **7an**. The product was purified by chromatography (silica gel, 3 x 20 cm, dry load on Celite, 25-mL fractions,  $\text{CH}_2\text{Cl}_2/\text{EtOAc}$  gradient elution: 100:0 (600 mL) to 99:1 (600 mL)) to afford 257.8 mg (33% yield) of **7an** as an oil. The product was purified to an analytical standard by diffusion pump Kugelrohr distillation ( $160\text{ }^{\circ}\text{C}$  ABT,  $4.0 \times 10^{-5}$  mmHg) to afford 251.6 mg (32%) of **7an** as a viscous oil.

Data for (1*S*,2*S*)-(-)-**7an**:

b.p.:  $160\text{ }^{\circ}\text{C}$  (ABT,  $4.0 \times 10^{-5}$  mmHg)

$^1\text{H}$  NMR: (500 MHz,  $\text{CDCl}_3$ )

7.96 (d,  $J = 8.3\text{ Hz}$ , 2H, HC(7)), 7.48 – 7.42 (m, 2H, HC(12)), 7.34 (d,  $J = 8.4\text{ Hz}$ ,

2H, HC(6)), 7.30 (dd,  $J = 4.8, 1.9$  Hz, 3H, HC(13) and HC(14)), 7.20 (t,  $J = 7.1$  Hz, 2H, HC(17)), 7.15 (t,  $J = 7.2$  Hz, 1H, HC(18)), 6.97 (d,  $J = 7.0$  Hz, 2H, HC(16)), 4.54 (d,  $J = 7.9$  Hz, 1H, HC(1)), 3.91 (s, 3H, H<sub>3</sub>C(10)), 3.46 (s, 1H, OH), 3.14 (ddd,  $J = 10.0, 8.1, 3.7$  Hz, 1H, HC(2)), 2.96 (ddd,  $J = 13.9, 9.1, 4.9$  Hz, 1H, H<sub>2</sub>C(4)), 2.68 (dt,  $J = 13.9, 8.3$  Hz, 1H, H<sub>2</sub>C(4)), 1.77 – 1.69 (m, 1H, H<sub>2</sub>C(3)), 1.64 (ddt,  $J = 14.4, 9.7, 5.0$  Hz, 1H, H<sub>2</sub>C(3)).

<sup>13</sup>C NMR: (126 MHz, CDCl<sub>3</sub>)  
167.0 (C(9)), 146.3 (C(5)), 141.0 (C(15)), 133.6 (C(12)), 132.5 (C(11)), 129.9 (C(8)), 129.8 (C(7)), 129.3 (C(13)), 128.5 (C(16)), 128.5 (C(17)), 128.1 (C(14)), 127.3 (C(6)), 126.2 (C(18)), 75.3 (C(1)), 58.4 (C(2)), 52.3 (C(10)), 33.2 (C(4)), 32.3 (C(3)).

IR: (neat)  
3457 (w), 3025 (w), 2948 (w), 1715 (m), 1610 (w), 1581 (w), 1496 (w), 1496 (w), 1453 (w), 1436 (m), 1414 (w), 1381 (w), 1310 (w), 1277 (m), 1182 (w), 1107 (m), 1087 (w), 1068 (w), 1018 (m), 965 (w), 908 (w), 861 (w), 810 (w), 766 (w), 731 (m), 697 (m), 647 (w), 607 (w), 563 (w).

LRMS: (ESI, [M+Na]<sup>+</sup>)  
149.1 (23), 215.1 (6), 233.1 (17), 265.1 (100), 343.1 (5), 375.1 (21), 415.1 (66).

HRMS: calcd for C<sub>24</sub>H<sub>24</sub>O<sub>3</sub>SNa ([M+Na]<sup>+</sup>): 415.1344, found: 415.1356

Analysis: C<sub>24</sub>H<sub>24</sub>O<sub>3</sub>S (392.51)  
Calcd: C, 73.44; H, 6.16%  
Found: C, 73.29; H, 6.04%

TLC:  $R_f$  0.31 (hexanes/EtOAc, 80:20, CAM)

HPLC: (1*S*,2*S*)-**7an**  $t_R$  10.8 min (87%); (1*R*,2*R*)-**7an**  $t_R$  12.5 min (13%) (Supelco Astec, hexanes/*i*-PrOH, 80:20, 1.0 mL/min, 220 nm, 24 °C)

Opt. Rot.:  $[\alpha]_D^{24} -74.2$  ( $c = 1.56$  in 100% EtOH) (74% ee)

**Preparation of (1*S*,2*S*)-(-)-4-((*tert*-Butyldimethylsilyl)oxy)-1-phenyl-2-(phenylthio)butan-1-ol ((1*S*,2*S*)-(-)-**7ba**)**

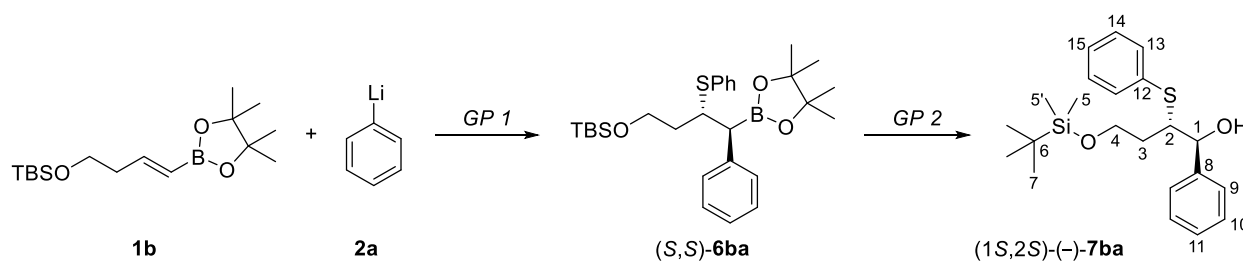

Alkylborane **6ba** was prepared according to *GP1a*. An oven-dried, 25-mL, Schlenk flask (**A**) equipped with a stir bar, septum, and digital thermocouple probe was charged with THF (5 mL) and (*E*)-4-(*tert*-butyldimethylsilyl)oxybut-1-en-1-yl pinacolborane **1b** (312.3 mg, 1.00 mmol). The resulting colorless solution was cooled to  $-78\text{ }^{\circ}\text{C}$  using a dry ice/isopropanol bath. A solution of phenyllithium **2a** in diethyl ether (1.77 M, 595  $\mu\text{L}$ , 1.05 mmol, 1.05 equiv) was added dropwise over 10 min, such that the internal temperature did not exceed  $-68\text{ }^{\circ}\text{C}$ . The dark red color of the phenyllithium solution immediately disappeared upon addition to the reaction mixture. The resulting pale, beige solution was stirred at  $-78\text{ }^{\circ}\text{C}$  for 1 h. A separate, oven-dried, 25-mL, Schlenk flask (**B**) equipped with a stir bar was charged with chiral (*S*)-catalyst **5** (52.3 mg, 0.10 mmol, 0.10 equiv) and brought into the glove box. To the flask was added *N*-(phenylthio)saccharin **4a** (352.2 mg, 1.20 mmol, 1.20 equiv). The flask was sealed with a septum and removed from the glove box. Absolute ethanol (5 mL) was added to flask **B**, and the resulting yellow suspension was sonicated under argon for 10 min. Flask **B** was equipped with a digital thermocouple probe and cooled to an internal temperature of  $-60\text{ }^{\circ}\text{C}$  using a Cryo-Cool. Flask **A**, having been stirred for 1 h at  $-78\text{ }^{\circ}\text{C}$ , was placed under vacuum (0.01 mmHg) and the cold bath was removed. The solution was stirred rapidly under vacuum for 30 min until all of the THF was removed. The resulting beige-colored, foam solid boronate complex **3ba** in flask **A** was taken up in ethanol (2.5 mL) at  $25\text{ }^{\circ}\text{C}$ , and the resulting solution was added dropwise via syringe to flask **B** over 10 min. A white suspension resulted. An additional portion of ethanol (2.5 mL) was added to flask **A** and then transferred to flask **B** as just described, to ensure complete transfer of the boronate complex. Flask **B** was stirred at  $-60\text{ }^{\circ}\text{C}$  for 24 h. The reaction was quenched by the addition of sat. aq.  $\text{NH}_4\text{Cl}$  (2.5 mL). The flask was removed from the cold bath and the biphasic mixture was allowed to warm to  $25\text{ }^{\circ}\text{C}$ . The mixture was diluted with diethyl ether (5 mL) and water (5 mL) and stirred rapidly to dissolve all solids. The biphasic mixture was transferred to a 60-mL separatory funnel and the layers were separated. The aqueous layer was washed with diethyl ether (2 x 10 mL), and the combined organic layers were dried over magnesium sulfate, filtered, and concentrated ( $30\text{ }^{\circ}\text{C}$ , 15 mmHg) to afford

671.7 mg of crude borane **6ba** as a yellow oil. The yield of **6ba** was determined to be 75% by quantitative  $^1\text{H}$ -NMR as described previously (p. S7).

Borane **6ba** was oxidized to alcohol **7ba** according to GP2. A 100-mL, round-bottomed flask equipped with a stir bar was charged with crude **6ba** (671.7 mg), THF (10 mL) and water (10 mL). Sodium perborate tetrahydrate (0.60 g, 3.9 mmol) and tetra-*n*-butylammonium chloride (28.0 mg, 0.10 mmol) were added sequentially to the rapidly stirred biphasic mixture at 25 °C. The mixture was stirred rapidly for 2.5 h. Full conversion was observed by TLC (hexanes/EtOAc, 90:10, CAM). The oxidation was quenched by the addition of solid sodium bisulfite,  $\text{NaHSO}_3$  (1.20 g) and the resulting mixture was stirred for 15 min. Then, aq. NaOH was added (1 M, 20 mL) and the mixture was stirred for 30 min. The mixture was transferred to a separatory funnel and diluted with diethyl ether (30 mL). The layers were separated, and the aqueous layer was extracted with diethyl ether (2 x 15 mL). The combined organic phases were washed with brine (25 mL) and then dried over magnesium sulfate, filtered, and concentrated (30 °C, 15 mmHg) to afford 442.0 mg of crude **7ba** as a yellow oil. The product was purified by chromatography (silica gel, 3 x 25 cm, dry load on Celite, 25-mL fractions, hexanes/EtOAc gradient elution: 95:5 (600 mL) to 92.5:7.5 (300 mL) to 90:10 (300 mL)) to afford 262.9 mg of **7ba** as a yellow oil. The product was purified to an analytical standard by diffusion pump Kugelrohr distillation (120 °C ABT,  $3.4 \times 10^{-5}$  mmHg) to afford 253.9 mg (65% yield) of **7ba** as a viscous, pale, yellow oil.

Data for (1*S*,2*S*)-(-)-**7ba**:

b.p.: 120 °C (ABT,  $3.4 \times 10^{-5}$  mmHg)

$^1\text{H}$  NMR: (500 MHz,  $\text{CDCl}_3$ )

7.42–7.38 (m, 2H, HC(13)), 7.38–7.34 (m, 2H, HC(9)), 7.33–7.29 (m, 2H, HC(10)), 7.28–7.21 (m, 4H, HC(11), HC(14), HC(15)), 4.60 (dd,  $J = 7.2, 2.7$  Hz, 1H, HC(1)), 3.86–3.76 (m, 2H,  $\text{H}_2\text{C}(4)$ ), 3.71 (d,  $J = 2.3$  Hz, 1H, OH), 3.52 (ddd,  $J = 8.9, 7.4, 4.2$  Hz, 1H, HC(2)), 1.78–1.68 (m, 1H,  $\text{H}_2\text{C}(3)$ ), 1.63–1.55 (m, 1H,  $\text{H}_2\text{C}(3)$ ), 0.84 (s, 9H,  $\text{H}_3\text{C}(7)$ ), –0.02 (s, 3H,  $\text{H}_3\text{C}(5)$ ), –0.04 (s, 3H,  $\text{H}_3\text{C}(5')$ ).

$^{13}\text{C}$  NMR: (126 MHz,  $\text{CDCl}_3$ )

141.4 (C(8)), 134.1 (C(12)), 132.8 (HC(13)), 129.1 (HC(14)), 128.4 (HC(10)), 128.0 (HC(11)), 127.4 (HC(15)), 127.2 (HC(9)), 75.9 (HC(1)), 60.1 ( $\text{H}_2\text{C}(4)$ ), 56.1 (HC(2)), 34.7 ( $\text{H}_2\text{C}(3)$ ), 26.0 ( $\text{H}_3\text{C}(7)$ ), 18.3 (C(6)), –5.29 ( $\text{H}_3\text{C}(5$  or  $5')$ ), –5.33 ( $\text{H}_3\text{C}(5$  or  $5')$ ).

IR: (neat)

3435 (w), 3061 (w), 3031 (w), 2953 (w), 2928 (w), 2883 (w), 2856 (w), 1947 (w), 1805 (w), 1584 (w), 1494 (w), 1471 (m), 1463 (w), 1439 (w), 1386 (w), 1361 (w), 1332 (w), 1318 (w), 1296 (w), 1253 (m), 1188 (w), 1156 (w), 1089 (s), 1041 (m), 1025 (m), 1005 (m), 938 (m), 913 (w), 832 (s), 809 (m), 774 (s), 742 (s), 697 (s), 662 (m), 608 (w), 573 (w), 530 (w), 512 (w), 483 (w).

LRMS: (CI, 70 eV)

89.0 (27), 111.0 (19), 129.0 (14), 131.0 (16), 147.0 (18), 213.0 (21), 225.0 (75), 226.0 (13), 239.0 (100), 240.0 (19), 371.1 (29), 388.1 (1), 389.1 (2).

Analysis: C<sub>22</sub>H<sub>32</sub>O<sub>2</sub>SSi (388.64)

Calcd: C, 67.99%; H, 8.30%

Found: C, 67.87%; H, 8.39%

TLC: *R<sub>f</sub>* 0.23 (hexanes/EtOAc, 90:10, CAM)

HPLC: (1*S*,2*S*)-**7ba** *t<sub>R</sub>* 22.0 min (96%); (1*R*,2*R*)-**7ba** *t<sub>R</sub>* 26.0 min (4%) (Regis (*R,R*)-Whelk O1, hexanes/*i*-PrOH, 98:2, 0.5 mL/min, 220 nm, 24 °C)

Opt. Rot.: [ $\alpha$ ]<sub>D</sub><sup>24</sup> -70.8 (*c* = 1.03 in 95% EtOH) (92% ee)

### Preparation of (1*S*,2*S*)-5-Chloro-1-phenyl-2-(phenylsulfonyl)pentan-1-ol ((1*S*,2*S*)-(+)-**10ca**)

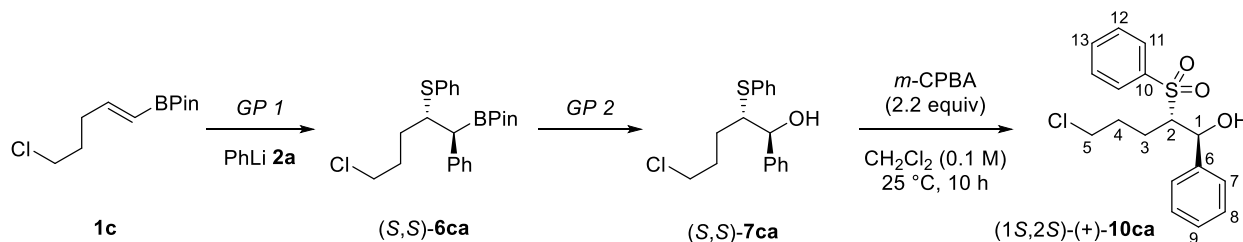

Alkylborane **6ca** was prepared according to *GP1a*. An oven-dried, 25-mL, Schlenk flask (**A**) equipped with a stir bar, septum, and digital thermocouple probe was charged with THF (5 mL) and (*E*)-5-chloropent-1-en-1-yl pinacolborane **1c** (230.5 mg, 1.00 mmol). The resulting colorless solution was cooled to -78 °C using a dry ice/isopropanol bath. A solution of phenyllithium **2a** in diethyl ether (1.77 M, 621  $\mu$ L, 1.1 mmol, 1.1 equiv) was added dropwise over 10 min, such that the internal temperature did not exceed -68 °C. The dark red color of the phenyllithium solution immediately disappeared upon addition to the reaction mixture. The resulting pale, beige solution was stirred at -78 °C for 1 h. A separate, oven-dried, 25-mL, Schlenk

flask **B**) equipped with a stir bar was charged with chiral (*S*)-catalyst **5** (52.1 mg, 0.10 mmol, 0.10 equiv) and brought into the glove box. To the flask was added *N*-(phenylthio)saccharin **4a** (350.0 mg, 1.20 mmol, 1.20 equiv). The flask was sealed with a septum and removed from the glove box. Absolute ethanol (5 mL) was added to flask **B**, and the resulting yellow suspension was sonicated under argon for 10 min. Flask **B** was equipped with a digital thermocouple probe and cooled to an internal temperature of  $-60\text{ }^{\circ}\text{C}$  using a Cryo-Cool. Flask **A**, having been stirred for 1 h at  $-78\text{ }^{\circ}\text{C}$ , was placed under vacuum (0.01 mmHg) and the cold bath was removed. The solution was stirred rapidly under vacuum for 30 min until all of the THF was removed. The resulting beige-colored, foam solid boronate complex **3ca** in flask **A** was taken up in ethanol (2.5 mL) at  $25\text{ }^{\circ}\text{C}$ , and the resulting solution was added dropwise via syringe to flask **B** over 10 min at  $-60\text{ }^{\circ}\text{C}$ . A white suspension resulted. An additional portion of ethanol (2.5 mL) was added to flask **A** and then transferred to flask **B** as just described, to ensure complete transfer of the boronate complex. Flask **B** was stirred at  $-60\text{ }^{\circ}\text{C}$  for 24 h. The reaction was quenched by the addition of sat. aq.  $\text{NH}_4\text{Cl}$  (1.0 mL). The flask was removed from the cold bath and the biphasic mixture was allowed to warm to  $25\text{ }^{\circ}\text{C}$  and stirred rapidly for 15 min. The biphasic mixture was transferred to a 250-mL round bottom flask (using  $\text{Et}_2\text{O}$  to transfer) and volatile components were removed by rotary evaporation ( $30\text{ }^{\circ}\text{C}$ , 50 mmHg). The residue was transferred to a separatory funnel with  $\text{Et}_2\text{O}$  (50 mL) and sat. aq.  $\text{NaHCO}_3$  (25 mL), and the layers were separated. The aqueous layer was extracted with  $\text{Et}_2\text{O}$  (3 x 50 mL), and the combined organic layers were dried over magnesium sulfate, filtered, and concentrated ( $30\text{ }^{\circ}\text{C}$ , 50 mmHg) to afford crude alkylborane **6ca**.

Borane **6ca** was oxidized to alcohol **7ca** according to GP2. A 100-mL, round-bottomed flask equipped with a stir bar was charged with crude **6ca**, THF (10 mL) and water (10 mL). Sodium perborate tetrahydrate (616 mg, 4.0 mmol) was added to the rapidly stirred biphasic mixture at  $25\text{ }^{\circ}\text{C}$ . The mixture was stirred rapidly for 2.5 h. Full conversion was observed by TLC (hexanes/ $\text{EtOAc}$ , 10:1, CAM). The oxidation was quenched by the addition of sat. aq. sodium thiosulfate ( $\text{Na}_2\text{S}_2\text{O}_3$ ) solution (25 mL) and was stirred for 30 min at  $25\text{ }^{\circ}\text{C}$ . The mixture was transferred to a separatory funnel and extracted with  $\text{Et}_2\text{O}$  (4 x 50 mL). The combined organic phases were washed with sat. aq. sodium thiosulfate ( $\text{Na}_2\text{S}_2\text{O}_3$ ) solution (25 mL), dried over magnesium sulfate, filtered, and concentrated ( $30\text{ }^{\circ}\text{C}$ , 50 mmHg) to afford crude **7ca**. The product was purified by chromatography (silica gel, 3 x 20 cm, wet load with  $\text{CH}_2\text{Cl}_2$ , 25-mL fractions, hexanes/ $\text{EtOAc}$  gradient elution: 95:5 (600 mL) to 90:10 (600 mL)) to afford pure **7ca**. The product

is stable at room temperature for several hours in the presence of trace amounts of solvent. Attempts to rigorously purify **7ca** resulted in extensive decomposition, presumably due to displacement of chloride by the thioether. Consequently, the product was analyzed and characterized as the corresponding sulfone **10ca**.

A 100-mL, round-bottomed flask equipped with a stir bar was charged with thioether **7ca**, CH<sub>2</sub>Cl<sub>2</sub> (10 mL), and *m*-CPBA (379.7 mg, 2.2 mmol). The reaction mixture was stirred at 25 °C for 10 h. Full conversion was observed by TLC (hexanes/EtOAc, 80:20, CAM). The reaction was quenched by the addition of sat. sodium thiosulfate (Na<sub>2</sub>S<sub>2</sub>O<sub>3</sub>) solution (25 mL) and was stirred for 30 min at 25 °C. Then aq. NaOH (1 N, 10 mL) was added to the mixture. The mixture was transferred to a separatory funnel and extracted with CH<sub>2</sub>Cl<sub>2</sub> (4 x 50 mL). The combined organic phases were washed with aq. NaOH (1 N, 20 mL), dried over magnesium sulfate, filtered, and concentrated (30 °C, 50 mmHg) to afford crude **10ca**. The product was purified by chromatography (silica gel, 3 x 20 cm, wet load with CH<sub>2</sub>Cl<sub>2</sub>, 25-mL fractions, hexanes/EtOAc gradient elution: 90:10 (600 mL) to 85:15 (600 mL)) to afford 291.4 mg (86%) of pure **10ca** as a white solid. Precipitation from hexanes/Et<sub>2</sub>O afforded 287.2 mg (85%) of analytically pure **10ca** as white solid.

Data for (1*S*,2*S*)-(+)-**10ca**:

m.p.: 82–83 °C (hexanes/Et<sub>2</sub>O)

<sup>1</sup>H NMR: (500 MHz, CDCl<sub>3</sub>)

7.97 – 7.91 (m, 2H, HC(11)), 7.72 – 7.66 (m, 1H, HC(13)), 7.63 – 7.56 (m, 2H, HC(12)), 7.37 – 7.27 (m, 5H, HC(7), HC(8), and HC(9)), 5.02 (dd, *J* = 8.8, 2.3 Hz, 1H, HC(1)), 4.34 (d, *J* = 2.4 Hz, 1H, OH), 3.32 (dt, *J* = 8.8, 5.1 Hz, 1H, HC(2)), 3.19 – 3.06 (m, 2H, H<sub>2</sub>C(5)), 1.80 – 1.68 (m, 1H, H<sub>2</sub>C(3)), 1.47 – 1.32 (m, 2H, H<sub>2</sub>C(3) and H<sub>2</sub>C(4)), 1.28 – 1.18 (m, 1H, H<sub>2</sub>C(4)).

<sup>13</sup>C NMR: (126 MHz, CDCl<sub>3</sub>)

139.4 (C(6)), 138.1 (C(10)), 134.3 (HC(13)), 129.5 (HC(12)), 128.96 (HC(11) or HC(8)), 128.95 (HC(9)), 128.9 (HC(11) or HC(8)), 127.3 (HC(7)), 73.6 (HC(1)), 70.1 (HC(2)), 44.2 (H<sub>2</sub>C(5)), 29.9 (H<sub>2</sub>C(4)), 24.5 (H<sub>2</sub>C(3)).

IR: (neat)

3491 (w), 2923 (w), 1496 (w), 1458 (w), 1448 (w), 1404 (w), 1372 (w), 1352 (w), 1306 (w), 1281 (m), 1252 (w), 1211 (w), 1152 (w), 1133 (m), 1078 (w), 1058 (w),

1028 (w), 997 (w), 919 (w), 836 (w), 760 (w), 748 (w), 728 (w), 704 (w), 691 (m), 681 (w), 636 (w), 606 (w), 562 (m), 522 (m), 485 (w), 458 (w).

**LRMS:** (ESI,  $[M+Na]^+$ )

179.1 (20), 321.1 (10), 361.1 (100).

**HRMS:** calcd for  $C_{17}H_{19}ClO_3SNa$  ( $[M+Na]^+$ ): 361.0641, found: 361.0637

**Analysis:**  $C_{17}H_{19}ClO_3S$  (338.85)

Calcd: C, 60.26%; H, 5.65%

Found: C, 59.91%; H, 5.60%

**TLC:**  $R_f$  0.38 (hexanes/EtOAc, 67:33, CAM)

**HPLC:** (1*R*,2*S*)-**10ca**,  $t_R$  12.2 min (1%); (1*S*,2*S*)-**10ca**,  $t_R$  18.7 min (99%) (Supelco Astec, hexanes/*i*-PrOH, 80:20, 1.0 mL/min, 220 nm, 24 °C)

**Opt. Rot.:**  $[\alpha]_D^{24} +45.3$  ( $c = 0.80$  in 100% EtOH) (98% ee)

### Preparation of (1*S*,2*S*)-6-Bromo-1-phenyl-2-(phenylsulfonyl)hexan-1-ol ((1*S*,2*S*)-(+)-**10da**)

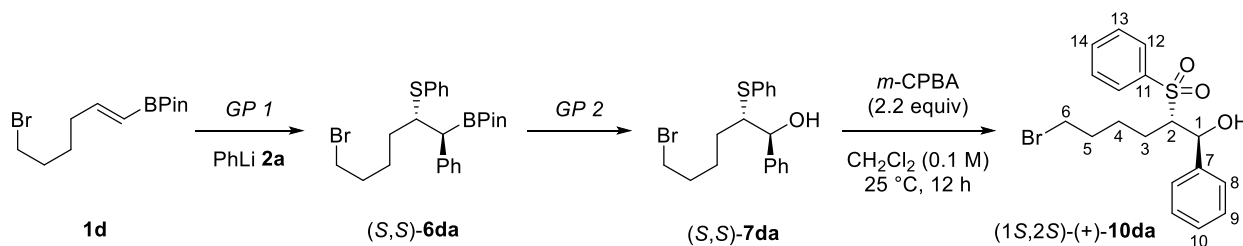

Alkylborane **6da** was prepared according to *GP1a*. An oven-dried, 25-mL, Schlenk flask (**A**) equipped with a stir bar, septum, and digital thermocouple probe was charged with THF (5 mL) and (*E*)-6-bromohex-1-en-1-yl pinacolborane (289.0 mg, 1.00 mmol). The resulting colorless solution was cooled to  $-78$  °C using a dry ice/isopropanol bath. A solution of phenyllithium **2a** in diethyl ether (1.77 M, 621  $\mu$ L, 1.1 mmol, 1.1 equiv) was added dropwise over 10 min, such that the internal temperature did not exceed  $-68$  °C. The dark red color of the phenyllithium solution immediately disappeared upon addition to the reaction mixture. The resulting pale, beige solution was stirred at  $-78$  °C for 1 h. A separate, oven-dried, 25-mL, Schlenk flask (**B**) equipped with a stir bar was charged with chiral (*S*)-catalyst **5** (52.1 mg, 0.10 mmol, 0.10 equiv) and brought into the glove box. To the flask was added *N*-(phenylthio)saccharin **4a** (350.0 mg, 1.20 mmol, 1.20 equiv). The flask was sealed with a septum and removed from the glove box. Absolute ethanol (5 mL) was added to flask **B**, and the resulting yellow suspension was sonicated under argon for 10

min. Flask **B** was equipped with a digital thermocouple probe and cooled to an internal temperature of  $-60\text{ }^{\circ}\text{C}$  using a Cryo-Cool. Flask **A**, having been stirred for 1 h at  $-78\text{ }^{\circ}\text{C}$ , was placed under vacuum (0.01 mmHg) and the cold bath was removed. The solution was stirred rapidly under vacuum for 30 min until all of the THF was removed. The resulting beige-colored, foam solid boronate complex **3da** in flask **A** was taken up in ethanol (2.5 mL) at  $25\text{ }^{\circ}\text{C}$ , and the resulting solution was added dropwise via syringe to flask **B** over 10 min at  $-60\text{ }^{\circ}\text{C}$ . A white suspension resulted. An additional portion of ethanol (2.5 mL) was added to flask **A** and then transferred to flask **B** as just described, to ensure complete transfer of the boronate complex. Flask **B** was stirred at  $-60\text{ }^{\circ}\text{C}$  for 24 h. The reaction was quenched by the addition of sat. aq.  $\text{NH}_4\text{Cl}$  (1.0 mL). The flask was removed from the cold bath and the biphasic mixture was allowed to warm to  $25\text{ }^{\circ}\text{C}$  and stirred rapidly for 15 min. The biphasic mixture was transferred to a 250-mL round bottom flask (using  $\text{Et}_2\text{O}$  to transfer) and volatile components were removed by rotary evaporation ( $30\text{ }^{\circ}\text{C}$ , 50 mmHg). The residue was transferred to a separatory funnel with  $\text{Et}_2\text{O}$  (50 mL) and sat. aq.  $\text{NaHCO}_3$  (25 mL), and the layers were separated. The aqueous layer was extracted with  $\text{Et}_2\text{O}$  (3 x 50 mL), and the combined organic layers were dried over magnesium sulfate, filtered, and concentrated ( $30\text{ }^{\circ}\text{C}$ , 50 mmHg) to afford crude alkylborane **6da**.

Borane **6da** was oxidized to alcohol **7da** according to GP2. A 100-mL, round-bottomed flask equipped with a stir bar was charged with crude **6da**, THF (10 mL) and water (10 mL). Sodium perborate tetrahydrate (616 mg, 4.0 mmol) was added to the rapidly stirred biphasic mixture at  $25\text{ }^{\circ}\text{C}$ . The mixture was stirred rapidly for 3 h. Full conversion was observed by TLC (hexanes/ $\text{EtOAc}$ , 90:10, CAM). The oxidation was quenched by the addition of sat. aq. sodium thiosulfate ( $\text{Na}_2\text{S}_2\text{O}_3$ ) solution (25 mL) and was stirred for 30 min at  $25\text{ }^{\circ}\text{C}$ . The mixture was transferred to a separatory funnel and extracted with  $\text{Et}_2\text{O}$  (4 x 50 mL). The combined organic phases were washed with sat. aq. sodium thiosulfate ( $\text{Na}_2\text{S}_2\text{O}_3$ ) solution (25 mL), dried over magnesium sulfate, filtered, and concentrated ( $30\text{ }^{\circ}\text{C}$ , 50 mmHg) to afford crude **7da**. The product was purified by chromatography (silica gel, 3 x 20 cm, wet load with  $\text{CH}_2\text{Cl}_2$ , 25-mL fractions, hexanes/ $\text{EtOAc}$  gradient elution: 95:5 (600 mL) to 90:10 (600 mL)) to afford pure **7da**. The product is stable at room temperature for several hours in the presence of trace amounts of solvent. Attempts to rigorously purify **7da** resulted in extensive decomposition, presumably due to displacement of bromide by the thioether. Consequently, the product was analyzed and characterized as the corresponding sulfone **10da**.

A 100-mL, round-bottomed flask equipped with a stir bar was charged with thioether **7da**, CH<sub>2</sub>Cl<sub>2</sub> (10 mL), and *m*-CPBA (379.7 mg, 2.2 mmol). The reaction mixture was stirred at 25 °C for 12 h. Full conversion was observed by TLC (hexanes/EtOAc, 80:20, CAM). The reaction was quenched by the addition of sat. sodium thiosulfate (Na<sub>2</sub>S<sub>2</sub>O<sub>3</sub>) solution (25 mL) and was stirred for 30 min at 25 °C. Then aq. NaOH (1 N, 10 mL) was added to the mixture. The mixture was transferred to a separatory funnel and extracted with CH<sub>2</sub>Cl<sub>2</sub> (4 x 50 mL). The combined organic phases were washed with aq. NaOH (1 N, 20 mL), dried over magnesium sulfate, filtered, and concentrated (30 °C, 50 mmHg) to afford crude **10da**. The product was purified by chromatography (silica gel, 3 x 20 cm, wet load with CH<sub>2</sub>Cl<sub>2</sub>, 25-mL fractions, hexanes/EtOAc gradient elution: 90:10 (600 mL) to 85:15 (600 mL)) to afford 336.3 mg (84%) of pure **10da** as a white solid. Precipitation from hexanes/Et<sub>2</sub>O afforded 320.3 mg (80%) of analytically pure **10da** as white solid.

Data for (1*S*,2*S*)-(+)-**10da**:

m.p.: 69–70 °C (hexanes/Et<sub>2</sub>O)

<sup>1</sup>H NMR: (500 MHz, CDCl<sub>3</sub>)

7.96 – 7.89 (m, 2H, HC(12)), 7.73 – 7.65 (m, 1H, HC(14)), 7.61 – 7.57 (m, 2H, HC(13)), 7.36 – 7.27 (m, 5H, HC(8), HC(9), and HC(10)), 5.03 (d, *J* = 8.7 Hz, 1H, HC(1)), 4.31 (bs, 1H, OH), 3.30 (ddd, *J* = 8.7, 5.8, 4.5 Hz, 1H, HC(2)), 3.03 (tq, *J* = 7.0, 3.2 Hz, 2H, H<sub>2</sub>C(6)), 1.67 – 1.57 (m, 1H, H<sub>2</sub>C(3)), 1.47 – 1.39 (m, 2H, H<sub>2</sub>C(5)), 1.34 – 1.26 (m, 1H, H<sub>2</sub>C(3)), 1.09 – 0.98 (m, 1H, H<sub>2</sub>C(4)), 0.96 – 0.86 (m, 1H, H<sub>2</sub>C(4)).

<sup>13</sup>C NMR: (126 MHz, CDCl<sub>3</sub>)

139.6 (C(7)), 138.4 (C(11)), 134.2 (HC(14)), 129.5 (HC(13)), 128.92 (HC(10)), 128.88 (HC(9) or HC(12)), 128.85 (HC(9) or HC(12)), 127.3 (HC(8)), 73.6 (HC(1)), 70.5 (HC(2)), 32.7 (H<sub>2</sub>C(6)), 32.1 (H<sub>2</sub>C(5)), 26.0 (H<sub>2</sub>C(3)), 25.8 (H<sub>2</sub>C(4)).

IR: (neat)

3494 (w), 2922 (w), 1496 (w), 1478 (w), 1447 (w), 1398 (w), 1376 (w), 1355 (w), 1278 (m), 1247 (w), 1229 (w), 1211 (w), 1147 (w), 1132 (m), 1078 (w), 1070 (w), 1028 (w), 997 (w), 916 (w), 836 (w), 760 (m), 730 (m), 703 (w), 689 (m), 640 (w), 610 (w), 566 (m), 554 (w), 529 (m), 516 (m), 486 (w), 459 (w).

LRMS: (ESI, [M+Na]<sup>+</sup>)

157.1(11), 237.0(69), 381.0(48), 419.0(96), 421.0(100).

**HRMS:** calcd for  $C_{18}H_{21}BrO_3SNa$  ( $[M+Na]^+$ ): 419.0292, found: 419.0305

**Analysis:**  $C_{18}H_{21}BrO_3S$  (397.33)

Calcd: C, 54.41%; H, 5.33%

Found: C, 54.38%; H, 5.32%

**TLC:**  $R_f$  0.41 (hexanes/EtOAc, 67:33, CAM)

**HPLC:** (1*R*,2*R*)-**10da**  $t_R$  12.1 min (1%); (1*S*,2*S*)-**10da**  $t_R$  17.9 min (99%) (Supelco Astec, hexanes/*i*-PrOH, 80:20, 1.0 mL/min, 220 nm, 24 °C)

**Opt. Rot.:**  $[\alpha]_D^{24} +41.2$  ( $c = 1.00$  in 100% EtOH) (98% ee)

### Preparation of (1*S*,2*S*)-(-)-2-Cyclohexyl-1-phenyl-2-(phenylthio)ethan-1-ol ((1*S*,2*S*)-(-)-**7ea**)

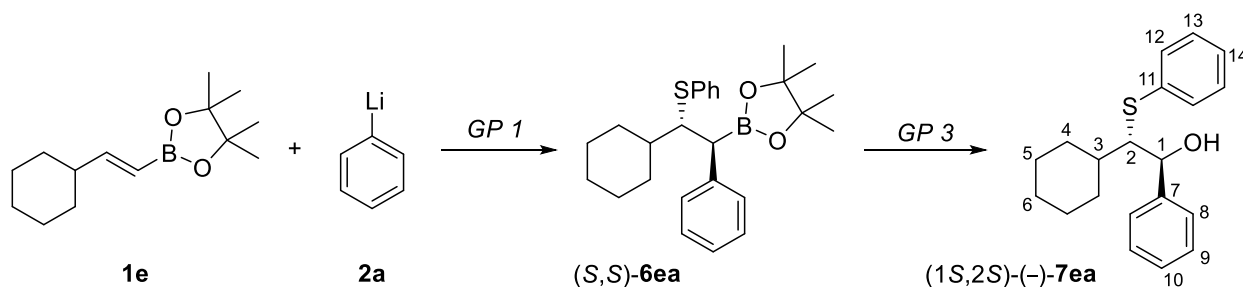

Alkylborane **6ea** was prepared according to *GP1a*. A flame-dried, 25-mL, Schlenk flask (**A**) equipped with a stir bar, septum, and digital thermocouple probe was charged with THF (5 mL) and (*E*)-2-cyclohexylvinyl pinacolborane **1e** (236.2 mg, 1.00 mmol). The resulting solution was cooled to  $-78$  °C using a dry ice/isopropanol bath. A solution of phenyllithium **2a** in diethyl ether (1.77 M, 621  $\mu$ L, 1.10 mmol, 1.10 equiv) was added dropwise over 10 min. The dark red color of the phenyllithium solution immediately disappeared upon addition to the reaction mixture. The resulting solution of boronate **3ea** was stirred at  $-78$  °C for 1 h. A separate, flame-dried, 50-mL, Schlenk flask (**B**) equipped with a stir bar was charged with chiral (*S*)-catalyst **5** (52.1 mg, 0.10 mmol, 0.10 equiv) and brought into the glove box. To the flask was added *N*-(phenylthio)saccharin **4a** (350.0 mg, 1.20 mmol, 1.20 equiv). The flask was sealed with a septum and removed from the glove box. Ethanol (5 mL) was added to flask **B**, and the resulting yellow suspension was sonicated under argon for 10 min. Flask **B** was equipped with a digital thermocouple probe and cooled to an internal temperature of  $-60$  °C using a Cryo-Cool. At this point, flask **A**, having been stirred for 1 h at  $-78$  °C, was placed under vacuum (0.01 mmHg) and the cold bath was removed. The solution was stirred rapidly under vacuum until all of the THF

was removed (30 min). The resulting solid boronate complex **3ea** in flask **A** was taken up in ethanol (2.5 mL) at 25 °C, and the resulting solution was added dropwise via syringe to flask **B** over 10 min. A white suspension resulted. An additional portion of ethanol (2.5 mL) was added to flask **A** and then transferred to flask **B** as just described, to ensure complete transfer of the boronate complex. Flask **B** was stirred at –60 °C for 24 h. The reaction was quenched by the addition of sat. aq.  $\text{NH}_4\text{Cl}$  (1 mL). The flask was removed from the cold bath and the biphasic mixture was allowed to warm to 25 °C and stirred rapidly for 15 min. The biphasic mixture was transferred to a 250-mL round bottom flask (using  $\text{Et}_2\text{O}$  to transfer) and volatile components were removed by rotary evaporation (30 °C, 50 mmHg). The residue was transferred to a separatory funnel with  $\text{Et}_2\text{O}$  (50 mL) and sat. aq.  $\text{NaHCO}_3$  (25 mL), and the layers were separated. The aqueous layer was extracted with diethyl ether (3 x 50 mL), and the combined organic layers were dried over magnesium sulfate, filtered, and concentrated (30 °C, 50 mmHg) to afford crude alkylborane **6ea**. As **7ea** is difficult to separate from catalyst (*S,S*)-**5** by chromatography, **6ea** was purified by chromatography (silica gel, 3 x 20 cm, dry load on Celite, 25-mL fractions, hexanes/ $\text{CH}_2\text{Cl}_2$  gradient elution: 75:25 (600 mL) to 65:35 (600 mL)) prior to oxidation.

Borane **6ea** was oxidized to alcohol **7ea** according to *GP3*. A 100-mL, round-bottomed flask equipped with a stir bar was charged with crude **6ea** and THF (10 mL). The turbid solution was cooled to 0 °C with an ice bath. To this solution was added a mixture of 30% aq.  $\text{H}_2\text{O}_2$  (1 mL) and 3 M aq.  $\text{NaOH}$  (1 mL) also containing EDTA (1.0 mg/mL). The biphasic mixture was stirred rapidly at 0 °C for 30 min. Full conversion was observed by TLC (hexanes/ $\text{EtOAc}$ , 90:10, CAM). The oxidation was quenched by the addition of sat. aq. sodium thiosulfate ( $\text{Na}_2\text{S}_2\text{O}_3$ ) solution (25 mL) and was stirred for 30 min at 25 °C. The mixture was transferred to a separatory funnel and extracted with diethyl ether (4 x 50 mL). The combined organic phases were washed with sat. aq. sodium thiosulfate ( $\text{Na}_2\text{S}_2\text{O}_3$ ) solution (25 mL), dried over magnesium sulfate, filtered, and concentrated (30 °C, 50 mmHg) to afford crude **7ea**. The product was purified by chromatography (silica gel, 3 x 20 cm, dry load on Celite, 25-mL fractions, hexanes/ $\text{EtOAc}$  gradient elution: 97:3 (600 mL) to 94:6 (600 mL)) to afford 284.7 mg (91% yield) of **7ea** as an oil. The product was purified to analytical standard by diffusion pump Kugelrohr distillation (160 °C ABT,  $4.0 \times 10^{-5}$  mmHg) to afford 282.6 mg (90%) of **7ea** as a viscous oil.

Data for (*S,S*)-(-)-**7ea**:

b.p.: 160 °C (ABT,  $4.0 \times 10^{-5}$  mmHg)

<sup>1</sup>H NMR: (500 MHz, CDCl<sub>3</sub>)

7.42 – 7.38 (m, 2H, HC(12)), 7.38 – 7.31 (m, 4H, HC(8) and HC(9)), 7.30 – 7.20 (m, 3H, HC(13) and HC(10)), 7.19 – 7.16 (m, 1H, HC(14)), 4.79 (dd,  $J = 8.2, 3.1$  Hz, 1H, HC(1)), 3.20 (dd,  $J = 8.2, 3.4$  Hz, 1H, HC(2)), 3.18 (d,  $J = 3.2$  Hz, 1H, OH), 1.89 – 1.82 (m, 1H, H<sub>2</sub>C(4)), 1.79 – 1.70 (m, 1H, H<sub>2</sub>C(5)), 1.64 (ddt,  $J = 27.5, 9.7, 2.4$  Hz, 2H, H<sub>2</sub>C(5)), 1.57 (dd,  $J = 12.1, 3.6$  Hz, 1H, H<sub>2</sub>C(4)), 1.51 – 1.41 (m, 2H, H<sub>2</sub>C(4) and HC(3)), 1.30 (dd,  $J = 12.0, 3.4$  Hz, 1H, H<sub>2</sub>C(4)), 1.20 – 1.05 (m, 3H, H<sub>2</sub>C(5) and H<sub>2</sub>C(6)).

<sup>13</sup>C NMR: (126 MHz, CDCl<sub>3</sub>)

142.0 (C(7)), 137.5 (C(11)), 131.3 (C(12)), 129.1 (C(13)), 128.6 (C(9)), 128.0 (C(10)), 126.8 (C(8)), 126.7 (C(14)), 74.6 (C(1)), 68.5 (C(2)), 40.3 (C(3)), 32.0 (C(4)), 28.5 (C(4)), 26.4 (C(5)), 26.3 (C(5)), 26.3 (C(6)).

IR: (neat)

3449 (w), 3059 (w), 2922 (m), 2850 (w), 1740 (w), 1581 (w), 1494 (w), 1477 (w), 1449 (w), 1438 (w), 1384 (w), 1348 (w), 1301 (w), 1244 (w), 1188 (w), 1085 (w), 1042 (w), 1025 (w), 1004 (w), 965 (w), 940 (w), 911 (w), 890 (w), 831 (w), 792 (w), 766 (w), 746 (m), 733 (m), 698 (m), 690 (m), 637 (w), 606 (w), 567 (w), 539 (w), 489 (w), 471 (w).

LRMS: (ESI, [M+Na]<sup>+</sup>)

117.1 (14), 185.1 (100), 199.1 (67), 295.2 (86), 335.1 (31).

HRMS: calcd for C<sub>20</sub>H<sub>24</sub>OSNa ([M+Na]<sup>+</sup>): 335.1446, found: 335.1434Analysis: C<sub>20</sub>H<sub>24</sub>OS (312.47)

Calcd: C, 76.88; H, 7.74%

Found: C, 76.88; H, 7.48%

TLC:  $R_f$  0.50 (hexanes/EtOAc, 83:17, CAM)HPLC: (1*S*,2*S*)-**7ea**  $t_R$  21.1 min (99%); (1*R*,2*R*)-**7ea**  $t_R$  22.4 min (1%) (Supelco Astec, hexanes/*i*-PrOH, 95:5, 0.5 mL/min, 220 nm, 24 °C)Opt. Rot.: [ $\alpha$ ]<sub>D</sub><sup>24</sup> –11.9 ( $c = 0.88$  in 100% EtOH) (98% ee)

**Preparation of (–)-2-Methyl-1-phenyl-2-(phenylthio)hexan-1-ol ((–)-7fa)**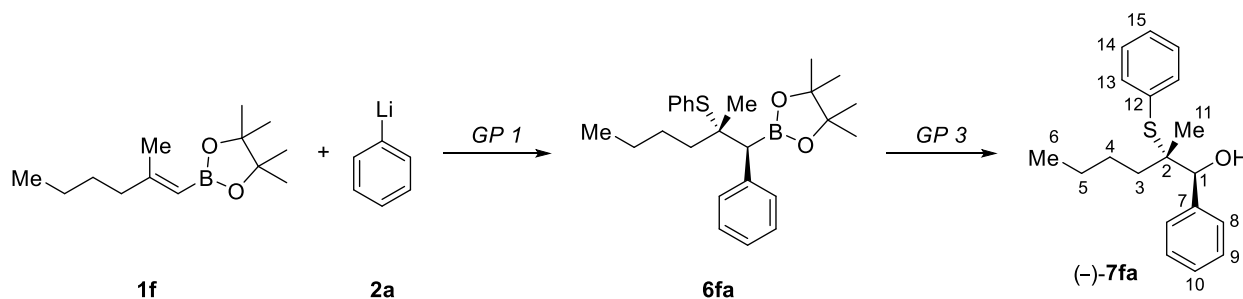

Alkylborane **6fa** was prepared according to *GP1a*. An oven-dried, 50-mL, Schlenk flask (**A**) equipped with a stir bar, septum, and digital thermocouple probe was charged with THF (7.5 mL) and (*E*)-2-methylhex-1-en-1-yl pinacolborane **1f** (334.6 mg, 1.49 mmol). The resulting clear, colorless solution was cooled to  $-78\text{ }^{\circ}\text{C}$  using a dry ice/isopropanol bath. A solution of phenyllithium **2a** in diethyl ether (1.77 M, 886  $\mu\text{L}$ , 1.57 mmol, 1.05 equiv) was added dropwise over 10 min, such that the internal temperature did not exceed  $-68\text{ }^{\circ}\text{C}$ . The dark red color of the phenyllithium solution immediately disappeared upon addition to the reaction mixture. After the addition, the resulting pale, brown solution was stirred at  $-78\text{ }^{\circ}\text{C}$  for 1 h. A separate, oven-dried, 25-mL, Schlenk flask (**B**) equipped with a stir bar was charged with chiral (*S*)-catalyst **5** (78.3 mg, 0.15 mmol, 0.10 equiv) and brought into the glove box. To the flask was added *N*-(phenylthio)saccharin **4a** (527.4 mg, 1.81 mmol, 1.21 equiv). The flask was sealed with a septum and removed from the glove box. Ethanol (7.5 mL) was added to flask **B**, and the resulting yellow suspension was sonicated under argon for 10 min. Flask **B** was equipped with a digital thermocouple probe and cooled to an internal temperature of  $-60\text{ }^{\circ}\text{C}$  using a Cryo-Cool. At this point, flask **A**, having been stirred for 1 h at  $-78\text{ }^{\circ}\text{C}$ , was placed under vacuum (0.01 mmHg) and the cold bath was removed. The solution was stirred rapidly under vacuum until all of the THF was removed (30 min). The resulting white, flaky solid boronate complex **3fa** in flask **A** was taken up in ethanol (3.75 mL) at  $25\text{ }^{\circ}\text{C}$ , and the resulting solution was added dropwise via syringe to flask **B** over 10 min. A white suspension resulted. An additional portion of ethanol (3.75 mL) was added to flask **A** and then transferred to flask **B** as just described, to ensure complete transfer of the boronate complex. Flask **B** was stirred at  $-60\text{ }^{\circ}\text{C}$  for 40 h. The reaction was quenched by the addition of sat. aq.  $\text{NH}_4\text{Cl}$  (3.75 mL). The flask was removed from the cold bath and the biphasic mixture was allowed to warm to  $25\text{ }^{\circ}\text{C}$ . The mixture was diluted with diethyl ether (7.5 mL) and water (7.5 mL) and stirred rapidly to dissolve all solids. The biphasic mixture was transferred to a

60-mL separatory funnel and the layers were separated. The aqueous layer was washed with diethyl ether (2 x 15 mL), and the combined organic layers were dried over magnesium sulfate, filtered, and concentrated (30 °C, 15 mmHg) to afford the crude borane **6fa** as a pink, oily solid. The yield of **6fa** was determined to be 33% by quantitative <sup>1</sup>H-NMR as described previously (p. S7).

Borane **6fa** was oxidized to alcohol **7fa** according to GP3. A 100-mL, round-bottomed flask equipped with a stir bar was charged with crude **6fa** and THF (15 mL). The turbid solution was cooled to 0 °C with an ice bath. To this solution was added a mixture of 30% aq. H<sub>2</sub>O<sub>2</sub> (1.5 mL) and 3 M aq. NaOH (1.5 mL) also containing EDTA (1.0 mg/mL). The biphasic mixture was stirred rapidly at 0 °C for 3 h. Full conversion was observed by TLC (hexanes/EtOAc, 90:10, CAM). The oxidation was quenched by the addition of a sodium bisulfite (NaHSO<sub>3</sub>) aq. solution (1.80 g in 15 mL water) and stirred for 15 min. The mixture was transferred to a separatory funnel and diluted with diethyl ether (45 mL). The layers were separated, and the aqueous layer was extracted with diethyl ether (2 x 25 mL). The combined organic phases were washed with brine (25 mL) and then dried over magnesium sulfate, filtered, and concentrated (30 °C, 15 mmHg) to afford 680.4 mg of crude **7fa**. The product was purified by chromatography (silica gel, 3 x 28 cm, dry load on Celite, 25-mL fractions, hexanes/EtOAc gradient elution: 97.5:2.5 (300 mL) to 95:5 (600 mL) to 92.5:7.5 (300 mL) to 90:10 (300 mL)) to afford 135.1 mg of **7fa** as an oil. The product was purified a second time by chromatography to remove an unidentified impurity (silica gel, 2 x 28 cm, dry load on Celite, 25-mL fractions, hexanes/CH<sub>2</sub>Cl<sub>2</sub> gradient elution: 90:10 (200 mL) to 80:20 (200 mL) to 70:30 (200 mL) to 60:40 (200 mL) to 50:50 (200 mL) to 60:40 (200 mL)) to afford 133.6 mg of **7fa**. The product was purified to an analytical standard by diffusion pump Kugelrohr distillation (90 °C ABT, 4.0 x 10<sup>-5</sup> mmHg) to afford 119.0 mg (27% yield) of **7fa** as a viscous, colorless oil.

Data for (–)-**7fa**:

b.p.: 90 °C (ABT, 4.0 x 10<sup>-5</sup> mmHg)

<sup>1</sup>H NMR: (500 MHz, CDCl<sub>3</sub>)

7.61–7.54 (m, 2H, HC(13)), 7.45–7.41 (m, 1H, HC(15)), 7.40–7.36 (m, 2H, HC(14)), 7.31–7.23 (m, 5H, HC(8), HC(9) and HC(10)), 4.30 (s, 1H, HC(1)), 3.86 (s, 1H, OH), 1.89–1.78 (m, 1H, H<sub>2</sub>C(4)), 1.34–1.25 (m, 1H, H<sub>2</sub>C(4)), 1.25–1.14 (m, 4H, H<sub>2</sub>C(5) and H<sub>2</sub>C(3)), 1.13 (s, 3H, H<sub>3</sub>C(11)), 0.87 (t, *J* = 7.2 Hz, 3H, H<sub>3</sub>C(6)).

<sup>13</sup>C NMR: (126 MHz, CDCl<sub>3</sub>)

138.9 (C(7)), 137.1 (HC(13)), 130.1 (C(12)), 129.5 (HC(15)), 129.1 (HC(14)), 128.6 (HC(8) or HC(9)), 127.78 (HC(10)), 127.75 (HC(8) or HC(9)), 76.8 (HC(1)), 61.6 (C(2)), 35.5 (H<sub>2</sub>C(3)), 26.4 (H<sub>2</sub>C(4)), 23.1 (H<sub>2</sub>C(5)), 17.7 (H<sub>3</sub>C(11)), 14.4 (H<sub>3</sub>C(6)).

IR: (neat)

3462 (w), 3061 (w), 3030 (w), 2956 (w), 2933 (w), 2870 (w), 1953 (w), 1886 (w), 1811 (w), 1604 (w), 1583 (w), 1573 (w), 1493 (w), 1474 (w), 1468 (w), 1454 (m), 1438 (m), 1378 (w), 1326 (w), 1303 (w), 1241 (w), 1187 (m), 1155 (w), 1128 (w), 1093 (w), 1044 (m), 1025 (m), 918 (w), 851 (w), 808 (w), 790 (w), 749 (s), 701 (s), 693 (s), 674 (m), 619 (w), 596 (m), 525 (m), 503 (m), 458 (m),

LRMS: (EI, 70 eV)

51.0 (17), 55.1 (69), 57.1 (17), 59.1 (15), 65.1 (22), 66.1 (10), 77.0 (63), 78.1 (13), 79.1 (55), 83.1 (70), 85.1 (10), 91.1 (63), 105.1 (29), 107.1 (35), 109.0 (56), 110.0 (65), 111.0 (18), 115.1 (20), 117.1 (37), 123.0 (70), 129.1 (13), 131.1 (36), 135.0 (10), 137.1 (94), 138.1 (12), 151.1 (25), 173.1 (27), 191.2 (15), 193.1 (100), 194.1 (92), 195.1 (39), 200.1 (14), 300.2 (1).

Analysis: C<sub>19</sub>H<sub>24</sub>OS (300.46)

Calcd: C, 75.95%; H, 8.05%

Found: C, 75.79%; H, 7.76%

TLC: *R<sub>f</sub>* 0.35 (hexanes/EtOAc, 90:10, CAM)

HPLC: (–)-**7fa** *t<sub>R</sub>* 12.6 min (54%); (+)-**7fa** *t<sub>R</sub>* 19.7 min (46%) (Regis (*R,R*)-Whelk O1, hexanes/*i*-PrOH, 95:5, 0.5 mL/min, 220 nm, 24 °C)

Opt. Rot.: [ $\alpha$ ]<sub>D</sub><sup>24</sup> –10.2 (*c* = 1.00 in 95% EtOH) (8% ee)

### Preparation of (2*S*,3*S*)-(+)–2,5-Diphenyl-3-(phenylthio)pentan-2-ol ((2*S*,3*S*)-(+)–**7ga**)

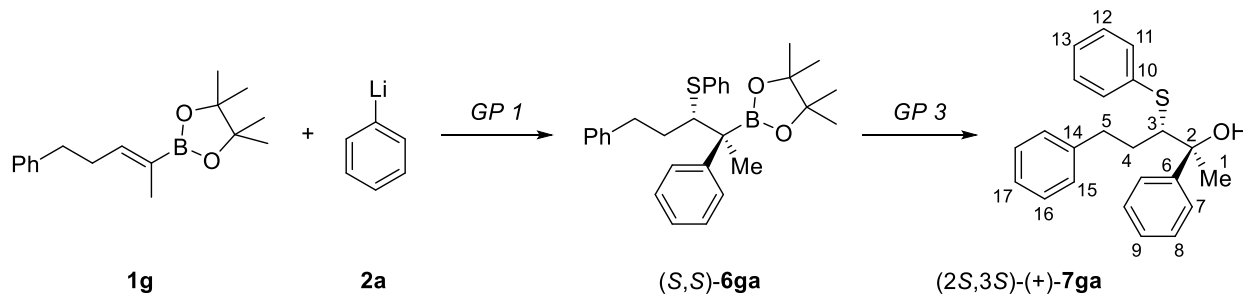

Alkylborane **6ga** was prepared according to *GP1a*. An oven-dried, 25-mL, Schlenk flask (**A**) equipped with a stir bar, septum, and digital thermocouple probe was charged with THF (5 mL) and (*Z*)-5-phenylpent-2-en-2-yl pinacolborane **1g** (273.0 mg, 1.00 mmol). The resulting pale, yellow solution was cooled to  $-78\text{ }^{\circ}\text{C}$  using a dry ice/isopropanol bath, and then stirred for 15 min to allow the temperature to equilibrate. A solution of phenyllithium **2a** in diethyl ether (1.77 M, 595  $\mu\text{L}$ , 1.05 mmol, 1.05 equiv) was added dropwise over 10 min, such that the internal temperature did not exceed  $-68\text{ }^{\circ}\text{C}$ . The dark red color of the phenyllithium solution immediately disappeared upon addition to the reaction mixture. The resulting pale, yellow solution was stirred at  $-78\text{ }^{\circ}\text{C}$  for 1 h. A separate, oven-dried, 25-mL, Schlenk flask (**B**) equipped with a stir bar was charged with chiral (*S*)-catalyst **5** (52.8 mg, 0.10 mmol, 0.10 equiv) and brought into the glove box. To the flask was added *N*-(phenylthio)saccharin **4a** (349.9 mg, 1.20 mmol, 1.20 equiv). The flask was sealed with a septum and removed from the glove box. Absolute ethanol (5 mL) was added to flask **B**, and the resulting yellow suspension was sonicated under argon for 10 min. Flask **B** was equipped with a digital thermocouple probe and cooled to an internal temperature of  $-60\text{ }^{\circ}\text{C}$  using a Cryo-Cool. Flask **A**, having been stirred for 1 h at  $-78\text{ }^{\circ}\text{C}$ , was placed under vacuum (0.01 mmHg) and the cold bath was removed. The solution was stirred rapidly under vacuum for 30 min until all of the THF was removed. The resulting beige-colored, foam solid boronate complex **3ga** in flask **A** was taken up in ethanol (2.5 mL) at  $25\text{ }^{\circ}\text{C}$ , and the resulting solution was added dropwise via syringe to flask **B** over 10 min. A white suspension resulted. An additional portion of ethanol (2.5 mL) was added to flask **A** and then transferred to flask **B** as just described, to ensure complete transfer of the boronate complex. Flask **B** was stirred at  $-60\text{ }^{\circ}\text{C}$  for 48 h. The reaction was quenched by the addition of sat. aq.  $\text{NH}_4\text{Cl}$  (2.5 mL). The flask was removed from the cold bath and the biphasic mixture was allowed to warm to  $25\text{ }^{\circ}\text{C}$ . The mixture was diluted with diethyl ether (5 mL) and water (5 mL) and stirred rapidly to dissolve all solids. The biphasic mixture was transferred to a 60-mL separatory funnel and the layers were separated. The aqueous layer was washed with diethyl ether (2 x 10 mL), and the combined organic layers were dried over magnesium sulfate, filtered, and concentrated ( $30\text{ }^{\circ}\text{C}$ , 15 mmHg) to afford 0.60 g of crude borane **6ga** as a red oil. The yield of **6ga** was determined to be 81% by quantitative  $^1\text{H}$ -NMR as described previously (p. S7).

Borane **6ga** was oxidized to alcohol **7ga** according to *GP3*. A 100-mL, round-bottomed flask equipped with a stir bar was charged with crude **6ga** and THF (10 mL). The turbid, red-

colored solution was cooled to 0 °C with an ice bath. To this solution was added a mixture of 30% aq. H<sub>2</sub>O<sub>2</sub> (1 mL) and 3 M aq. NaOH (1 mL) also containing EDTA (1.0 mg/mL). The biphasic mixture was stirred rapidly at 0 °C for 1.5 h. Full conversion was observed by TLC (hexanes/EtOAc, 90:10, CAM). The oxidation was quenched by the addition of a sodium bisulfite (NaHSO<sub>3</sub>) aq. solution (1.20 g in 10 mL water) and stirred for 15 min. The mixture was transferred to a separatory funnel and diluted with diethyl ether (30 mL). The layers were separated, and the aqueous layer was extracted with diethyl ether (2 x 15 mL). The combined organic phases were washed with brine (25 mL) and then dried over magnesium sulfate, filtered, and concentrated (30 °C, 15 mmHg) to afford 0.53 g of crude **7ga** as a pink oil. The product was purified by chromatography (silica gel, 3 x 25 cm, dry load on Celite, 25-mL fractions, hexanes/EtOAc gradient elution: 95:5 (600 mL) to 92.5:7.5 (300 mL) to 90:10 (300 mL)) to afford 307.2 mg of **7ga** as a pink oil which is contaminated with 5-phenylpentan-2-one.<sup>22</sup> **Note:** To remove this ketone impurity prior to distillation, the product mixture was dissolved in absolute ethanol (5 mL) and the resulting solution was cooled to 0 °C with an ice bath. Sodium borohydride (9 mg) was added, and the reaction mixture was stirred at 0 °C for 30 min. The reaction was quenched by the addition of sat. aq. NH<sub>4</sub>Cl (1 mL). The mixture was diluted with diethyl ether (10 mL) and water (10 mL) and transferred to a 60-mL separatory funnel. The layers were separated. The aqueous layer was extracted with diethyl ether (2 x 10 mL), and the combined organic layers were dried over magnesium sulfate, filtered, and concentrated (30 °C, 15 mmHg). The residue was purified by chromatography (silica gel, 3 x 25 cm, dry load on Celite, 25-mL fractions, hexanes/EtOAc gradient elution: 95:5 (600 mL) to 92.5:7.5 (300 mL) to 90:10 (300 mL)) to afford 281.0 mg of **7ga** as an oil. The product was purified to an analytical standard by diffusion pump Kugelrohr distillation (120 °C ABT, 4.0 x 10<sup>-5</sup> mmHg) to afford 265.5 mg (76% yield) of **7ga** as a viscous, colorless oil.

Data for (2*S*,3*S*)-(+)-**7ga**:

b.p.: 120 °C (ABT, 4.0 x 10<sup>-5</sup> mmHg)

<sup>1</sup>H NMR: (500 MHz, CDCl<sub>3</sub>)

7.46–7.42 (m, 2H, HC(11)), 7.42–7.39 (m, 2H, HC(7)), 7.30–7.19 (m, 6H, HC(9), HC(8), HC(12), HC(13)), 7.16–7.08 (m, 3H, HC(16), HC(17)), 6.82 (dd, *J* = 7.2, 1.8 Hz, 2H, HC(15)), 3.33 (dd, *J* = 11.3, 2.2 Hz, 1H, HC(3)), 3.13 (s, 1H, OH), 2.97 (ddd, *J* = 13.7, 9.1, 4.4 Hz, 1H, H<sub>2</sub>C(5)), 2.50 (ddd, *J* = 13.9, 8.4 Hz, 1H, H<sub>2</sub>C(5)),

1.97–1.89 (m, 1H, H<sub>2</sub>C(4)), 1.78–1.70 (m, 1H, H<sub>2</sub>C(4)), 1.63 (s, 3H, H<sub>3</sub>C(1)).

<sup>13</sup>C NMR: (126 MHz, CDCl<sub>3</sub>)

145.0 (C(6)), 141.2 (C(14)), 137.2 (C(10)), 131.3 (HC(11)), 129.2 (HC(12)), 128.5 (HC(15) or HC(16)), 128.4 (HC(15) or HC(16)), 128.2 (HC(8)), 127.4 (HC(9)), 126.9 (HC(13)), 126.1 (HC(7)), 125.9 (HC(17)), 76.5 (C(2)), 65.2 (HC(3)), 34.0 (H<sub>2</sub>C(5)), 33.7 (H<sub>2</sub>C(4)), 24.1 (H<sub>3</sub>C(1)).

IR: (neat)

3473 (w), 3059 (w), 3026 (w), 2932 (w), 2857 (w), 1602 (w), 1582 (w), 1495 (w), 1479 (w), 1446 (m), 1439 (m), 1375 (w), 1344 (w), 1182 (w), 1066 (w), 1026 (m), 1001 (w), 937 (w), 908 (m), 875 (w), 792 (w), 764 (m), 738 (s), 695 (s), 616 (m), 594 (w), 563 (w), 488 (m).

LRMS: (EI, 70 eV)

51.0 (13), 65.1 (18), 77.0 (24), 91.1 (88), 92.1 (10), 109.0 (13), 110.0 (41), 115.1 (16), 117.1 (45), 118.1 (55), 121.1 (71), 131.1 (81), 135.0 (12), 222.1 (13), 228.1 (100), 229.1 (23), 348.2 (<1).

Analysis: C<sub>23</sub>H<sub>24</sub>OS (348.50)

Calcd: C, 79.27%; H, 6.94%

Found: C, 78.98%; H, 6.88%

TLC: *R*<sub>f</sub> 0.28 (hexanes/EtOAc, 90:10, CAM)

HPLC: (2*S*,3*S*)-**7ga** *t*<sub>R</sub> 20.2 min (96%); (2*R*,3*R*)-**7ga** *t*<sub>R</sub> 21.8 min (4%) (Supelco Astec, hexanes/*i*-PrOH, 95:5, 0.5 mL/min, 220 nm, 24 °C)

Opt. Rot.: [ $\alpha$ ]<sub>D</sub><sup>24</sup> +17.8 (*c* = 1.30 in 95% EtOH) (92% ee)

### Preparation of (S)-(-)-2-Phenyl-1-(phenylthio)propan-2-ol ((S)-(-)-**7ha**)

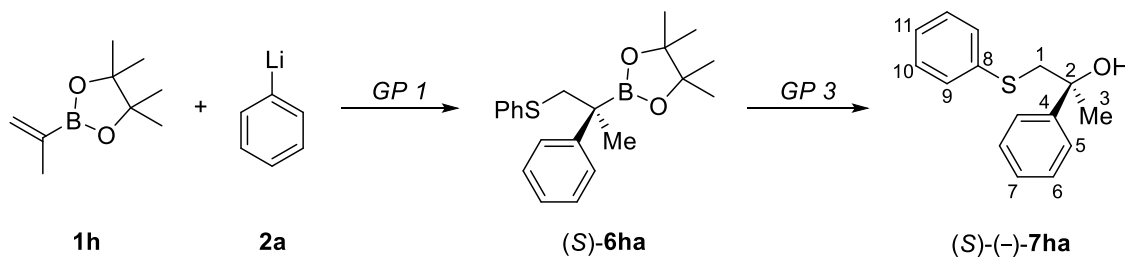

Alkylborane **6ha** was prepared according to a **modification** of *GP1a*. An oven-dried, 25-mL, Schlenk flask (**A**) equipped with a stir bar, septum, and digital thermocouple probe was

charged with THF (5 mL) and isopropenyl pinacolborane **1h** (167.9 mg, 1.00 mmol). The resulting colorless solution was cooled to  $-78\text{ }^{\circ}\text{C}$  using a dry ice/isopropanol bath, and then stirred for 15 min to allow the temperature to equilibrate. A solution of phenyllithium **2a** in diethyl ether (1.77 M, 595  $\mu\text{L}$ , 1.05 mmol, 1.05 equiv) was added dropwise over 10 min, such that the internal temperature did not exceed  $-68\text{ }^{\circ}\text{C}$ . The dark red color of the phenyllithium solution immediately disappeared upon addition to the reaction mixture. The resulting *white suspension* was stirred at  $-78\text{ }^{\circ}\text{C}$  for 10 min, then warmed to  $0\text{ }^{\circ}\text{C}$ , resulting in a pale, yellow solution. The solution was maintained at  $0\text{ }^{\circ}\text{C}$  for 50 min and then returned to  $-78\text{ }^{\circ}\text{C}$ , again resulting in a white suspension. A separate, oven-dried, 25-mL, Schlenk flask (**B**) equipped with a stir bar was charged with chiral (*S*)-catalyst **5** (52.1 mg, 0.10 mmol, 0.10 equiv) and brought into the glove box. To the flask was added *N*-(phenylthio)saccharin **4a** (350.0 mg, 1.20 mmol, 1.20 equiv). The flask was sealed with a septum and removed from the glove box. Absolute ethanol (5 mL) was added to flask **B**, and the resulting yellow suspension was sonicated under argon for 10 min. Flask **B** was equipped with a digital thermocouple probe and cooled to an internal temperature of  $-60\text{ }^{\circ}\text{C}$  using a Cryo-Cool. Flask **A**, having been stirred for 1 h at  $-78\text{ }^{\circ}\text{C}$ , was placed under vacuum (0.01 mmHg) and the cold bath was removed. The white suspension was stirred rapidly under vacuum for 30 min until all of the THF was removed. The resulting white, flaky solid boronate complex **3ha** in flask **A** was taken up in ethanol (2.5 mL) at  $25\text{ }^{\circ}\text{C}$ , and the resulting solution was added dropwise via syringe to flask **B** over 10 min. A white suspension resulted. An additional portion of ethanol (2.5 mL) was added to flask **A** and then transferred to flask **B** as just described, to ensure complete transfer of the boronate. Flask **B** was stirred at  $-60\text{ }^{\circ}\text{C}$  for 36 h. The reaction was quenched by the addition of sat. aq.  $\text{NH}_4\text{Cl}$  (2.5 mL). The flask was removed from the cold bath and the biphasic mixture was allowed to warm to  $25\text{ }^{\circ}\text{C}$ . The mixture was diluted with diethyl ether (5 mL) and water (5 mL) and stirred rapidly to dissolve all solids. The biphasic mixture was transferred to a 60-mL separatory funnel and the layers were separated. The aqueous layer was washed with diethyl ether (2 x 10 mL), and the combined organic layers were dried over magnesium sulfate, filtered, and concentrated ( $30\text{ }^{\circ}\text{C}$ , 15 mmHg) to afford 466.3 mg of crude borane **6ha** as a red oil. The yield of **6ha** was determined to be 89% by quantitative  $^1\text{H}$ -NMR as described previously (p. S7).

Borane **6ha** was oxidized to alcohol **7ha** according to GP3. A 100-mL, round-bottomed flask equipped with a stir bar was charged with crude **6ha** and THF (10 mL). The turbid, red-colored solution was cooled to  $0\text{ }^{\circ}\text{C}$  with an ice bath. To this solution was added a mixture of 30%

aq. H<sub>2</sub>O<sub>2</sub> (1 mL) and 3 M aq. NaOH (1 mL) also containing EDTA (1.0 mg/mL). The biphasic mixture was stirred rapidly at 0 °C for 30 min. Full conversion was observed by TLC (hexanes/EtOAc, 90:10, CAM). The oxidation was quenched by the addition of a sodium bisulfite (NaHSO<sub>3</sub>) aq. solution (1.20 g in 10 mL water) and stirred for 15 min. The mixture was transferred to a separatory funnel and diluted with diethyl ether (30 mL). The layers were separated, and the aqueous layer was extracted with diethyl ether (2 x 15 mL). The combined organic phases were washed with brine (25 mL) and then dried over magnesium sulfate, filtered, and concentrated (30 °C, 15 mmHg) to afford 378.4 mg of crude **7ha** as an oil. The product was purified by chromatography (silica gel, 3 x 25 cm, dry load on Celite, 25-mL fractions, hexanes/EtOAc gradient elution: 95:5 (600 mL) to 90:10 (600 mL)) to afford 194.2 mg of **7ha** as a yellow oil. The product was purified to an analytical standard by diffusion pump Kugelrohr distillation (80 °C ABT, 3.4 x 10<sup>-5</sup> mmHg) to afford 180.3 mg (74% yield) of **7ha** as a viscous, pale, yellow oil.

Data for (S)-(-)-**7ha**:

b.p.: 80 °C (ABT, 3.4 x 10<sup>-5</sup> mmHg)

<sup>1</sup>H NMR: (500 MHz, CDCl<sub>3</sub>)

7.48–7.43 (m, 2H, HC(5)), 7.36–7.30 (m, 4H, HC(9) and HC(6)), 7.26–7.21 (m, 3H, HC(7) and HC(10)), 7.19–7.14 (m, 1H, HC(11)), 3.54 (d, *J* = 13.3 Hz, 1H, H<sub>2</sub>C(1)), 3.36 (d, *J* = 13.3 Hz, 1H, H<sub>2</sub>C(1)), 2.85 (s, 1H, OH), 1.62 (s, 3H, H<sub>3</sub>C(3)).

<sup>13</sup>C NMR: (126 MHz, CDCl<sub>3</sub>)

146.3 (C(4)), 136.7 (C(8)), 130.2 (HC(9)), 129.1 (HC(10)), 128.4 (HC(6)), 127.3 (HC(7)), 126.6 (HC(11)), 125.0 (HC(5)), 74.1 (C(2)), 49.8 (H<sub>2</sub>C(1)), 29.6 (H<sub>3</sub>C(3)).

IR: (neat)

3448 (w), 3058 (w), 2976 (w), 2927 (w), 1582 (w), 1493 (w), 1480 (m), 1446 (m), 1439 (m), 1373 (w), 1333 (w), 1269 (w), 1238 (w), 1179 (w), 1087 (m), 1066 (m), 1025 (m), 1000 (w), 940 (w), 911 (w), 842 (w), 765 (m), 737 (s), 716 (m), 697 (s), 689 (s), 608 (m), 581 (m), 541 (m), 473 (m).

LRMS: (EI, 70 eV)

77.1 (24), 78.1 (18), 91.1 (15), 103.1 (18), 109.0 (11), 110.0 (41), 111.0 (82), 115.1 (13), 117.1 (41), 118.1 (24), 119.1 (72), 121.1 (27), 124.1 (37), 125.1 (11), 149.1 (42), 211.1 (13), 226.1 (29), 227.1 (100), 228.1 (14), 244.1 (1), 245.2 (1).

Analysis: C<sub>15</sub>H<sub>16</sub>OS (244.35)

Calcd: C, 73.73%; H, 6.60%

Found: C, 73.70%; H, 6.54%

TLC:  $R_f$  0.19 (hexanes/EtOAc, 90:10, CAM)

SFC: (*S*)-**7ha**  $t_R$  18.9 min (95%); (*R*)-**7ha**  $t_R$  20.0 min (5%) (Chiralpak OD, 5-15% MeOH in CO<sub>2</sub> over 20 min, then hold 15% MeOH in CO<sub>2</sub> for 10 min, 2.0 mL/min, 220 nm, 40 °C)

Opt. Rot.:  $[\alpha]_D^{24}$  -23.1 ( $c$  = 1.33 in 95% EtOH)

### Preparation of (*S*)-(-)-1-Phenyl-2-(phenylthio)ethan-1-ol ((*S*)-(-)-**7ia**)

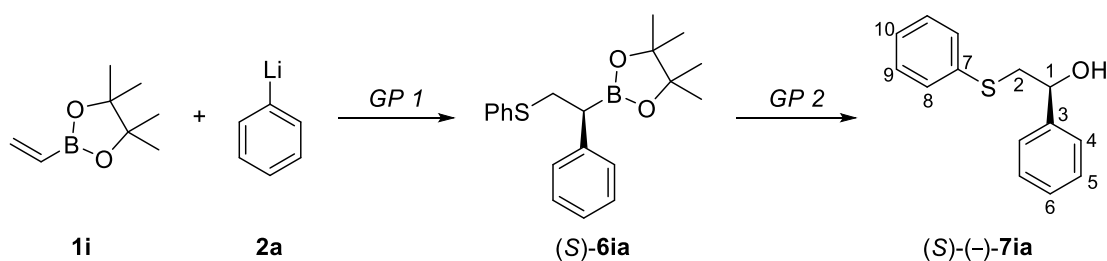

Alkylborane **6ia** was prepared according to *GP1a*. An oven-dried, 25-mL, Schlenk flask (**A**) equipped with a stir bar, septum, and digital thermocouple probe was charged with THF (5 mL) and vinyl pinacolborane **1i** (154.3 mg, 1.00 mmol). The resulting colorless solution was cooled to -78 °C using a dry ice/isopropanol bath, and then stirred for 15 min to allow the temperature to equilibrate. A solution of phenyllithium **2a** in diethyl ether (1.77 M, 595  $\mu$ L, 1.05 mmol, 1.05 equiv) was added dropwise over 10 min, such that the internal temperature did not exceed -68 °C. The dark red color of the phenyllithium solution immediately disappeared upon addition to the reaction mixture. The resulting pale, pink-brown solution was stirred at -78 °C for 1 h. A separate, oven-dried, 25-mL, Schlenk flask (**B**) equipped with a stir bar was charged with chiral (*S*)-catalyst **5** (51.9 mg, 0.10 mmol, 0.10 equiv) and brought into the glove box. To the flask was added *N*-(phenylthio)saccharin **4a** (350.0 mg, 1.20 mmol, 1.20 equiv). The flask was sealed with a septum and removed from the glove box. Absolute ethanol (5 mL) was added to flask **B**, and the resulting yellow suspension was sonicated under argon for 10 min. Flask **B** was equipped with a digital thermocouple probe and cooled to an internal temperature of -60 °C using a Cryo-Cool. Flask **A**, having been stirred for 1 h at -78 °C, was placed under vacuum (0.01 mmHg) and the cold bath was removed. The solution was stirred rapidly under vacuum for 30 min until all of the THF was removed. The resulting beige-colored, foam solid boronate complex **3ia** in flask **A**

was taken up in ethanol (2.5 mL) at 25 °C, and the resulting solution was added dropwise via syringe to flask **B** over 10 min. A white suspension resulted. An additional portion of ethanol (2.5 mL) was added to flask **A** and then transferred to flask **B** as just described, to ensure complete transfer of the boronate. Flask **B** was stirred at –60 °C for 16 h. The reaction was quenched by the addition of sat. aq. NH<sub>4</sub>Cl (2.5 mL). The flask was removed from the cold bath and the biphasic mixture was allowed to warm to 25 °C. The mixture was diluted with diethyl ether (5 mL) and water (5 mL) and stirred rapidly to dissolve all solids. The biphasic mixture was transferred to a 60-mL separatory funnel and the layers were separated. The aqueous layer was washed with diethyl ether (2 x 10 mL), and the combined organic layers were dried over magnesium sulfate, filtered, and concentrated (30 °C, 15 mmHg) to afford 371.0 mg of crude borane **6ia** as a yellow oil. The yield of **6ia** was determined to be 65% by quantitative <sup>1</sup>H-NMR as described previously (p. S7).

Borane **6ia** was oxidized to alcohol **7ia** according to GP2. A 100-mL, round-bottomed flask equipped with a stir bar was charged with crude **6ia** (371.0 mg), THF (10 mL) and water (10 mL). Sodium perborate tetrahydrate (604.3 mg, 3.9 mmol) and tetra-*n*-butylammonium chloride (31.7 mg, 0.11 mmol) were added sequentially to the rapidly stirred biphasic mixture at 25 °C. The mixture was stirred rapidly for 2 h at 25 °C. Full conversion was observed by TLC (hexanes/EtOAc, 90:10, CAM). The oxidation was quenched by the addition of solid sodium bisulfite, NaHSO<sub>3</sub> (1.20 g) and the resulting mixture was stirred for 15 min. Then, aq. NaOH was added (1 M, 20 mL) and the mixture was stirred for 30 min. The mixture was transferred to a separatory funnel and diluted with diethyl ether (30 mL). The layers were separated, and the aqueous layer was extracted with diethyl ether (2 x 15 mL). The combined organic phases were washed with brine (25 mL) and then dried over magnesium sulfate, filtered, and concentrated (30 °C, 15 mmHg) to afford 295.7 mg of crude **7ia** as an oil. The product was purified by chromatography (silica gel, 3 x 19 cm, dry load on Celite, 25-mL fractions, hexanes/EtOAc gradient elution: 95:5 (600 mL) to 90:10 (600 mL) to 85:15 (300 mL)) to afford 144.4 mg of **7ia** as an oil. The product was purified to an analytical standard by diffusion pump Kugelrohr distillation (100 °C ABT, 4.2 x 10<sup>-5</sup> mm Hg) to afford 137.8 mg (60% yield) of **7ia** as a viscous, pale, yellow oil.

Data for (S)-(-)-**7ia**:

b.p.: 100 °C (ABT, 4.2 x 10<sup>-5</sup> mm Hg)

<sup>1</sup>H NMR: (500 MHz, CDCl<sub>3</sub>)

7.45–7.41 (m, 2H, HC(8)), 7.38–7.34 (m, 4H, HC(4) and HC(5)), 7.34–7.28 (m, 3H, HC(9) and HC(6)), 7.26–7.22 (HC(10)), 4.73 (dt,  $J = 9.5, 2.9$  Hz, 1H, HC(1)), 3.34 (dd,  $J = 13.8, 3.5$  Hz, 1H, H<sub>2</sub>C(2)), 3.10 (dd,  $J = 13.8, 9.5$  Hz, 1H, H<sub>2</sub>C(2)), 2.82 (d,  $J = 2.4$  Hz, 1H, OH).

<sup>13</sup>C NMR: (126 MHz, CDCl<sub>3</sub>)

142.3 (C(3)), 135.0 (C(7)), 130.4 (HC(8)), 129.3 (HC(9)), 128.7 (HC(5)), 128.2 (HC(6)), 127.0 (HC(10)), 126.0 (HC(4)), 71.8 (HC(1)), 44.3 (H<sub>2</sub>C(2)).

IR: (neat)

3395 (w), 3059 (w), 3029 (w), 2961 (w), 2919 (w), 1950 (w), 1881 (w), 1807 (w), 1601 (w), 1582 (w), 1493 (w), 1480 (m), 1453 (w), 1438 (m), 1409 (w), 1331 (w), 1300 (w), 1272 (w), 1232 (w), 1193 (w), 1156 (w), 1086 (w), 1053 (m), 1025 (m), 1001 (m), 989 (m), 914 (w), 857 (w), 769 (w), 736 (s), 691 (s), 612 (m), 523 (m), 474 (m).

LRMS: (EI, 70 eV)

51.0 (41), 65.1 (19), 77.0 (71), 78.0 (25), 79.0 (79), 91.0 (30), 107.0 (41), 109.0 (16), 110.0 (10), 123.0 (16), 124.0 (100), 125.0 (10), 230.1 (9), 231.0 (2).

Analysis: C<sub>14</sub>H<sub>14</sub>OS (230.32)

Calcd: C, 73.01%; H, 6.13%

Found: C, 72.81%; H, 5.97%

TLC:  $R_f$  0.14 (hexanes/EtOAc, 90:10, CAM)

HPLC: (*S*)-**7ia**  $t_R$  10.7 min (84%); (*R*)-**7ia**  $t_R$  12.5 min (16%) (Regis (*R,R*)-Whelk O1, hexanes/*i*-PrOH, 80:20, 0.5 mL/min, 220 nm, 24 °C)

Opt. Rot.:  $[\alpha]_D^{24} -36.3$  ( $c = 1.37$  in 95% EtOH) (68% ee)

**Preparation of (1*R*,2*S*)-(+)-1,4-Diphenyl-2-(phenylthio)butan-1-ol ((1*R*,2*S*)-(+)-7ja)**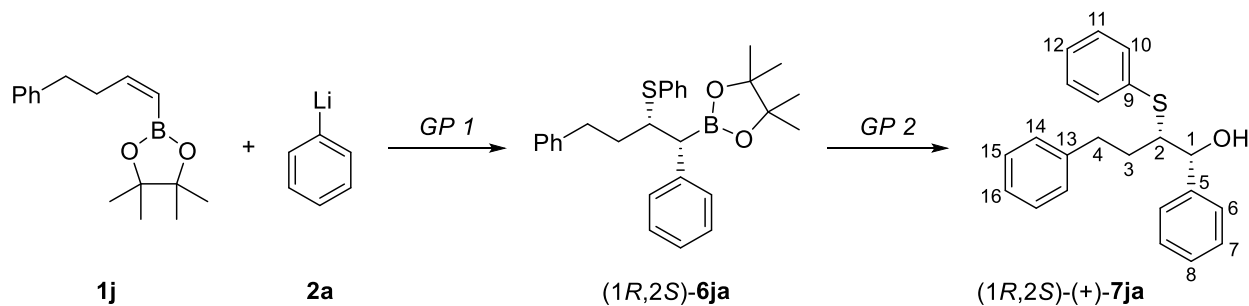

Alkylborane **6ja** was prepared according to *GP1a*. An oven-dried, 25-mL, Schlenk flask (**A**) equipped with a stir bar, septum, and digital thermocouple probe was charged with THF (5 mL) and (*Z*)-4-phenylbut-1-en-1-yl pinacolborane **1j** (259.5 mg, 1.01 mmol). The resulting clear, colorless solution was cooled to  $-78\text{ }^{\circ}\text{C}$  using a dry ice/isopropanol bath, and then stirred for 15 min to allow the temperature to equilibrate. A solution of phenyllithium **2a** in diethyl ether (1.77 M, 596  $\mu\text{L}$ , 1.06 mmol, 1.05 equiv) was added dropwise over 10 min, such that the internal temperature did not exceed  $-68\text{ }^{\circ}\text{C}$ . The dark red color of the phenyllithium solution immediately disappeared upon addition to the reaction mixture. After the addition, the resulting pale, yellow solution was stirred at  $-78\text{ }^{\circ}\text{C}$  for 1 h. A separate, oven-dried, 25-mL, Schlenk flask (**B**) equipped with a stir bar was charged with chiral (*S*)-catalyst **5** (52.8 mg, 0.10 mmol, 0.10 equiv) and brought into the glove box. To the flask was added *N*-(phenylthio)saccharin **4a** (352.3 mg, 1.21 mmol, 1.20 equiv). The flask was sealed with a septum and removed from the glove box. Ethanol (5 mL) was added to flask **B**, and the resulting yellow suspension was sonicated under argon for 10 min. Flask **B** was equipped with a digital thermocouple probe and cooled to an internal temperature of  $-60\text{ }^{\circ}\text{C}$  using a Cryo-Cool. At this point, flask **A**, having been stirred for 1 h at  $-78\text{ }^{\circ}\text{C}$ , was placed under vacuum (0.01 mmHg) and the cold bath was removed. The solution was stirred rapidly under vacuum until all of the THF was removed (30 min). The resulting white, solid boronate complex **3ja** in flask **A** was taken up in ethanol (2.5 mL) at  $25\text{ }^{\circ}\text{C}$ , and the resulting solution was added dropwise via syringe to flask **B** over 10 min. A white suspension resulted. An additional portion of ethanol (2.5 mL) was added to flask **A** and then transferred to flask **B** as just described, to ensure complete transfer of the boronate. Flask **B** was stirred at  $-60\text{ }^{\circ}\text{C}$  for 48 h. The reaction was quenched by the addition of sat. aq.  $\text{NH}_4\text{Cl}$  (2.5 mL). The flask was removed from the cold bath and the biphasic mixture was allowed to warm to  $25\text{ }^{\circ}\text{C}$ . The mixture was diluted with diethyl ether

(5 mL) and water (5 mL) and stirred rapidly to dissolve all solids. The biphasic mixture was transferred to a 60-mL separatory funnel and the layers were separated. The aqueous layer was washed with diethyl ether (2 x 10 mL), and the combined organic layers were dried over magnesium sulfate, filtered, and concentrated (30 °C, 15 mmHg) to afford the crude borane **6ja** as a red oil. The yield of **6ja** was determined to be 62% by quantitative <sup>1</sup>H-NMR as described previously (p. S7).

Borane **6ja** was oxidized to alcohol **7ja** according to GP2. A 100-mL, round-bottomed flask equipped with a stir bar was charged with crude **6ja** (0.65 g), THF (10 mL) and water (10 mL). Sodium perborate tetrahydrate (600 mg, 4.42 mmol) and tetra-*n*-butylammonium chloride (30 mg, 0.11 mmol) were added sequentially to the rapidly stirred biphasic mixture at 25 °C. The mixture was stirred rapidly for 2 h. Full conversion was observed by TLC (hexanes/EtOAc, 90:10, CAM). The oxidation was quenched by the addition of solid sodium bisulfite, NaHSO<sub>3</sub> (1.20 g) and the resulting mixture was stirred for 15 min. Then, aq. NaOH was added (1 M, 20 mL) and the mixture was stirred for 30 min. The mixture was transferred to a separatory funnel and diluted with diethyl ether (30 mL). The layers were separated, and the aqueous layer was extracted with diethyl ether (2 x 15 mL). The combined organic phases were washed with brine (25 mL) and then dried over magnesium sulfate, filtered, and concentrated (30 °C, 15 mmHg) to afford 0.47 g of crude **7ja**. The product was purified by chromatography (silica gel, 3 x 20 cm, dry load on Celite, 25-mL fractions, hexanes/EtOAc gradient elution: 95:5 (600 mL) to 92.5:7.5 (300 mL) to 90:10 (600 mL)) to afford 222.4 mg of **7ja** as an oil. The product was purified to an analytical standard by diffusion pump Kugelrohr distillation (125 °C ABT, 3.4 x 10<sup>-5</sup> mmHg) to afford 205.1 mg (61% yield) of **7ja** as a viscous, clear, colorless oil.

Data for (1*R*,2*S*)-(+)-**7ja**:

b.p.: 125 °C (ABT, 3.4 x 10<sup>-5</sup> mmHg)

<sup>1</sup>H NMR: (500 MHz, CDCl<sub>3</sub>)

7.46–7.40 (m, 2H, HC(10)), 7.34–7.26 (m, 5H, HC(11), HC(12), HC(7)), 7.25–7.23 (m, 1H, HC(8)), 7.23–7.19 (m, 4H, HC(6), HC(15)), 7.18–7.13 (m, 1H, HC(16)), 7.03–6.98 (m, 2H, HC(14)), 4.78 (t, *J* = 3.1 Hz, 1H, HC(1)), 3.34 (dt, *J* = 10.1, 3.2 Hz, 1H, HC(2)), 2.90 (ddd, *J* = 13.8, 9.1, 4.7 Hz, 1H, H<sub>2</sub>C(4)), 2.79–2.75 (m, 1H, OH), 2.61 (dt, *J* = 14.0, 8.4 Hz, 1H, H<sub>2</sub>C(4)), 1.97–1.86 (m, 1H, H<sub>2</sub>C(3)), 1.80–1.69 (m, 1H, H<sub>2</sub>C(3)).

**<sup>13</sup>C NMR:** (126 MHz, CDCl<sub>3</sub>)

141.4 (C(13)), 140.8 (C(5)), 134.6 (C(9)), 132.5 (HC(10)), 129.4 (HC(11)), 128.6 (HC(14) or HC(15)), 128.4 (HC(14) or HC(15)), 128.3 (HC(7)), 127.6 (HC(8) or HC(12)), 127.5 (HC(8) or HC(12)), 126.1 (HC(6)), 126.0 (HC(16)), 73.6 (HC(1)), 57.2 (HC(2)), 33.5 (H<sub>2</sub>C(4)), 29.0 (H<sub>2</sub>C(3)).

**IR:** (neat)

3448 (w), 3060 (w), 3026 (w), 2928 (w), 1602 (w), 1583 (w), 1496 (w), 1480 (w), 1452 (m), 1438 (w), 1388 (w), 1327 (w), 1221 (w), 1186 (w), 1091 (w), 1049 (m), 1025 (m), 918 (w), 845 (w), 742 (s), 695 (s), 604 (w), 561 (w), 544 (w), 492 (m).

**LRMS:** (EI, 70 eV)

65.0 (13), 77.0 (15), 91.1 (89), 104.1 (15), 109.0 (12), 110.0 (26), 115.1 (41), 116.1 (10), 117.1 (100), 118.1 (14), 128.1 (14), 129.1 (19), 165.1 (11), 169.1 (12), 170.1 (17), 178.1 (15), 179.1 (14), 191.1 (10), 205.1 (10), 206.1 (36), 207.1 (29), 208.1 (24), 228.1 (17), 316.1 (28), 334.1 (2).

**Analysis:** C<sub>22</sub>H<sub>22</sub>OS (334.48)

Calcd: C, 79.00%; H, 6.63%

Found: C, 78.77%; H, 6.57%

**TLC:** *R<sub>f</sub>* 0.23 (hexanes/EtOAc, 90:10, CAM)

**HPLC:** (1*S*,2*R*)-**7ja** *t<sub>R</sub>* 20.2 min (31%); (1*R*,2*S*)-**7ja** *t<sub>R</sub>* 22.6 min (69%) (Regis (*R,R*)-Whelk O1, hexanes/*i*-PrOH, 98:2, 0.5 mL/min, 220 nm, 24 °C)

**Opt. Rot.:** [ $\alpha$ ]<sub>D</sub><sup>24</sup> +7.6 (*c* = 1.18 in 95% EtOH) (38% ee)

### Preparation of *N*-(Phenylthio)benzotriazole (**4b**)

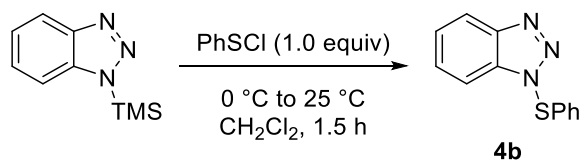

A flame-dried, 50-mL round-bottomed flask equipped with a stir bar was charged with (trimethylsilyl)benzotriazole<sup>23</sup> (2.00 g, 10.45 mmol) and CH<sub>2</sub>Cl<sub>2</sub> (10 mL) and the resulting solution was cooled to 0 °C using an ice bath. A solution of phenylsulfonyl chloride<sup>24</sup> (1.51 g, 10.45 mmol, 1.0 equiv) in CH<sub>2</sub>Cl<sub>2</sub> (5 mL) was added dropwise over 5 min. The reaction was stirred for 30 min at 0 °C and then for 1 h at 25 °C. Volatile components were removed by rotary evaporation (25

°C, 15 mmHg) and the flask was placed under hi-vacuum (<0.1 mmHg) for 3 h to remove the trimethylsilyl chloride byproduct, at which point crystalline, yellow solid **4b** could be observed. The flask was backfilled with argon, and hexanes (15 mL) were added via syringe. The yellow-colored supernatant was removed by cannula, and the flask was returned to high vacuum (<0.1 mmHg) to remove residual hexanes. This washing protocol was repeated, and the flask was dried under high vacuum (<0.1 mmHg) for 12 h to afford 2.00 g (84%) of yellow-beige solid **4b**. The product undergoes rapid hydrolysis in air and must be stored in the glove box.

**Data for **4b**:**

**<sup>1</sup>H NMR:** (500 MHz, CDCl<sub>3</sub>)

8.09 (d, *J* = 8.3 Hz, 1H), 7.73 (d, *J* = 8.3 Hz, 1H), 7.55 (t, *J* = 7.6 Hz, 1H), 7.46 – 7.37 (m, 3H), 7.33 – 7.26 (m, 3H).

**<sup>13</sup>C NMR:** (126 MHz, CDCl<sub>3</sub>)

145.8, 137.1, 134.89 129.7, 129.6, 129.4, 129.0, 124.8, 120.5, 110.6.

**HRMS:** calcd for C<sub>12</sub>H<sub>10</sub>N<sub>3</sub>S ([M+H]<sup>+</sup>): 228.0595, found: 228.0588

**Gram Scale Preparation of (1*S*,2*S*)-(-)-**6aa****

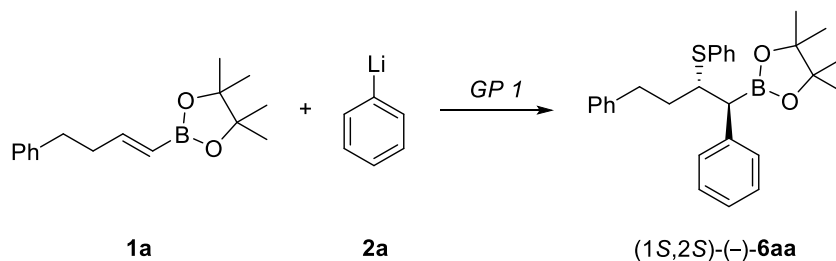

Alkylborane **6aa** was prepared according to *GPIa*. An oven-dried, 50-mL, Schlenk flask (**A**) equipped with a stir bar, septum, and digital thermocouple probe was charged with THF (20 mL) and (*E*)-4-phenylbut-1-en-1-yl pinacolborane **1a** (1.29 g, 5.00 mmol). The resulting colorless solution was cooled to –78 °C using a dry ice/isopropanol bath, and then stirred for 15 min to allow the temperature to equilibrate. A solution of phenyllithium **2a** in diethyl ether (1.77 M, 3.10 mL, 5.5 mmol, 5.5 equiv) was added dropwise over 10 min, such that the internal temperature did not exceed –68 °C. The resulting pale, yellow solution was stirred at –78 °C for 1 h. A separate, oven-dried, 100-mL, Schlenk flask (**B**) equipped with a stir bar was charged with chiral (*S*)-catalyst **5** (260 mg, 0.50 mmol, 0.10 equiv) and brought into the glove box. To the flask was added *N*-(phenylthio)saccharin **4a** (1.75g, 6.0 mmol, 1.20 equiv). The flask was sealed with a septum and

removed from the glove box. Absolute ethanol (35 mL) was added to flask **B**, and the resulting yellow suspension was sonicated under argon for 10 min. Flask **B** was equipped with a digital thermocouple probe and cooled to  $-78\text{ }^{\circ}\text{C}$  using a dry ice/isopropanol bath. Flask **A**, having been stirred for 1 h at  $-78\text{ }^{\circ}\text{C}$ , was placed under vacuum (0.01 mmHg) and the cold bath was removed. The solution was stirred rapidly under vacuum for 50 min until all of the THF was removed. The resulting beige-colored, foam solid boronate complex **3aa** in flask **A** was taken up in ethanol (10 mL) at  $23\text{ }^{\circ}\text{C}$ , and the resulting solution was added dropwise via syringe to flask **B** over 10 min. A white suspension resulted. An additional portion of ethanol (5.0 mL) was added to flask **A** and then transferred to flask **B** as just described, to ensure complete transfer of the boronate. Flask **B** was then moved into a  $-60\text{ }^{\circ}\text{C}$  cooling bath and stirred for 36 h. The reaction was quenched by the addition of sat. aq.  $\text{NH}_4\text{Cl}$  (2.0 mL). The flask was removed from the cold bath and the biphasic mixture was allowed to warm to  $25\text{ }^{\circ}\text{C}$  and stirred rapidly for 15 min. The biphasic mixture was transferred to a 250-mL round bottom flask (using  $\text{Et}_2\text{O}$  to transfer) and volatile components were removed by rotary evaporation ( $30\text{ }^{\circ}\text{C}$ , 50 mmHg). The residue was transferred to a separatory funnel with  $\text{Et}_2\text{O}$  (50 mL) and sat. aq.  $\text{NaHCO}_3$  (25 mL), and the layers were separated. The aqueous layer was extracted with  $\text{Et}_2\text{O}$  (3 x 50 mL), and the combined organic layers were dried over magnesium sulfate, filtered, and concentrated ( $30\text{ }^{\circ}\text{C}$ , 50 mmHg) to afford crude alkylborane **6aa**. The product was purified by chromatography (silica gel, 5 x 12 cm, dry load on Celite, 25-mL fractions, hexanes/ $\text{CH}_2\text{Cl}_2$  gradient elution: 80:20 to 65:35) to afford 1.8002 g (81%) of pure **6aa** as a colorless oil which solidified upon standing. An enantiomeric ratio of 98:2 was measured for the oxidation product **7aa**.

Data for (1*S*,2*S*)-(-)-**6aa**:

$^1\text{H}$  NMR: (500 MHz,  $\text{CDCl}_3$ )

7.64 (d,  $J = 8.0\text{ Hz}$ , 2H), 7.35 (t,  $J = 7.7\text{ Hz}$ , 2H), 7.32 – 7.22 (m, 5H), 7.21 – 7.15 (m, 3H), 7.12 (t,  $J = 7.2\text{ Hz}$ , 1H), 6.91 (d,  $J = 7.5\text{ Hz}$ , 2H), 3.59 (ddd,  $J = 11.9, 8.5, 3.1\text{ Hz}$ , 1H), 2.83 (ddd,  $J = 14.6, 10.3, 4.7\text{ Hz}$ , 1H), 2.69 – 2.59 (m, 1H), 1.77 (dddd,  $J = 14.0, 10.1, 6.5, 3.2\text{ Hz}$ , 1H), 1.54 (ddt,  $J = 18.9, 9.6, 5.0\text{ Hz}$ , 1H), 1.25 (s, 6H), 1.23 (s, 6H).

$^{13}\text{C}$  NMR: (126 MHz,  $\text{CDCl}_3$ )

142.1, 140.0, 135.0, 133.5, 129.2, 128.9, 128.54, 128.49, 128.2, 127.3, 126.0, 125.7, 83.8, 51.6, 39.1, 34.7, 32.2, 25.0, 24.6.

Opt. Rot.:  $[\alpha]_{\text{D}}^{24} -32.4$  ( $c = 1.46$  in  $\text{CHCl}_3$ ) (96% ee)

### Preparation of (1*S*,2*S*)-(-)-**6ai** for X-Ray Analysis

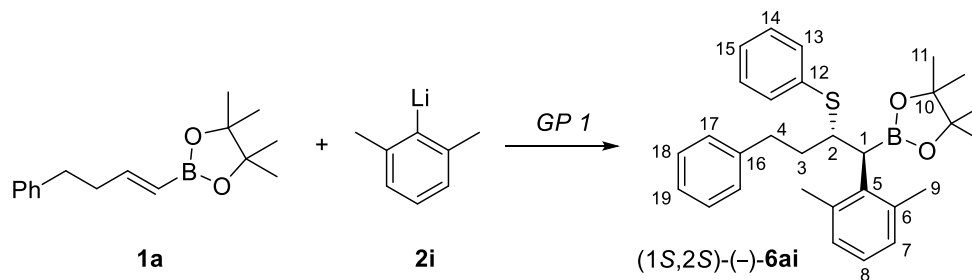

Alkylborane **6ai** was prepared according to *GP1b*. A flame-dried, 25-mL Schlenk flask (**A**) equipped with a magnetic stir bar, septum, and digital thermocouple probe was charged with 2-bromo-1,3-dimethylbenzene (147  $\mu\text{L}$ , 1.10 mmol, 1.10 equiv) and THF (5 mL). The resulting solution was cooled to  $-78^\circ\text{C}$  using a dry ice/isopropanol bath. A solution of *n*-butyllithium in hexanes (667  $\mu\text{L}$ , 1.65 M, 1.10 equiv) was added dropwise over 10 min. The resulting solution of (2,6-dimethylphenyl)lithium **2i** was stirred at  $-78^\circ\text{C}$  for 1 h. Then, a solution of (*E*)-4-phenylbut-1-en-1-yl pinacolborane **1a** (258.2 mg, 1.0 mmol, 1.0 equiv) in THF (5 mL) was added dropwise to flask **A** over 15 min. The resulting solution of **3ai** was stirred at  $-78^\circ\text{C}$  for 30 min followed by  $25^\circ\text{C}$  for 30 min. A separate, flame-dried, 50-mL Schlenk flask (**B**) equipped with a stir bar was charged with chiral catalyst (*S*)-**5** (52.1 mg, 0.10 mmol, 0.10 equiv) and brought into the glove box. To the flask was added *N*-(phenylthio)saccharin **4a** (350.0 mg, 1.20 mmol, 1.20 equiv). The flask was sealed with a septum and removed from the glove box. Absolute ethanol (5 mL) was added to flask **B**, and the resulting yellow suspension was sonicated under argon for 10 min. Flask **B** was equipped with a digital thermocouple probe and cooled to an internal temperature of  $-60^\circ\text{C}$  using a Cryo-Cool. Flask **A**, having been stirred for 1 h, was returned to  $-78^\circ\text{C}$  and placed under vacuum (0.01 mmHg). The cold bath was removed, and the solution was stirred rapidly under vacuum for 30 min until all of the THF was removed. The resulting foam solid boronate complex **3ai** in flask **A** was taken up in ethanol (2.5 mL) at  $25^\circ\text{C}$ , and the resulting solution was added dropwise via syringe to flask **B** over 10 min. A white suspension resulted. An additional portion of ethanol (2.5 mL) was added to flask **A** and then transferred to flask **B** as just described, to ensure complete transfer of the boronate. Flask **B** was stirred at  $-60^\circ\text{C}$  for 24 h. The reaction was quenched by the addition of sat. aq.  $\text{NH}_4\text{Cl}$  (1 mL). The flask was removed from the cold bath and the biphasic mixture was allowed to warm to  $25^\circ\text{C}$  and stirred rapidly for 15 min. The biphasic

mixture was transferred to a 250-mL round bottom flask (using Et<sub>2</sub>O to transfer) and volatile components were removed by rotary evaporation (30 °C, 50 mmHg). The residue was transferred to a separatory funnel with Et<sub>2</sub>O (50 mL) and sat. aq. NaHCO<sub>3</sub> (25 mL), and the layers were separated. The aqueous layer was extracted with Et<sub>2</sub>O (3 x 50 mL), and the combined organic layers were dried over magnesium sulfate, filtered, and concentrated (30 °C, 50 mmHg) to afford crude alkylborane **6ai**. The crude material was purified by chromatography (silica gel, 3 x 20 cm, dry load on Celite, 25-mL fractions, hexanes/CH<sub>2</sub>Cl<sub>2</sub> gradient elution: 75:25 to 65:35) to give 396.9 mg (84%) of pure **6ai**. Pure **6ai** was dissolved in hexanes/Et<sub>2</sub>O (10 mL, 95:5). Evaporation of solvent afforded colorless crystals.

Data for (1*S*,2*S*)-(-)-**6ai**:

m.p.: 104–105 °C (hexanes/Et<sub>2</sub>O)

<sup>1</sup>H NMR: (500 MHz, CDCl<sub>3</sub>)

7.69 – 7.62 (m, 2H, HC(13)), 7.34 (t, *J* = 7.2 Hz, 2H, HC(14)), 7.29 (t, *J* = 7.3 Hz, 1H, HC(15)), 7.14 (t, *J* = 7.2 Hz, 2H, HC(18)), 7.09 (t, *J* = 7.2 Hz, 1H, HC(19)), 6.96–6.86 (m, 3H, HC(7) and HC(8)), 6.85 (d, *J* = 7.1 Hz, 2H, HC(17)), 3.83 (ddd, *J* = 12.3, 9.7, 2.7 Hz, 1H, HC(2)), 3.11 (d, *J* = 12.3 Hz, 1H, HC(1)), 2.75 (ddd, *J* = 14.2, 9.7, 4.7 Hz, 1H, HC(4)), 2.66 (ddd, *J* = 13.6, 9.4, 7.1 Hz, 1H, HC(4)), 2.27 (d, *J* = 23.2 Hz, 6H, HC(9)), 1.61 (dddd, *J* = 14.0, 9.8, 7.0, 2.8 Hz, 1H, HC(3)), 1.43 (dtd, *J* = 14.2, 9.5, 4.8 Hz, 1H, HC(3)), 1.23 (s, 6H, HC(11)), 1.17 (s, 6H, HC(11)).

<sup>13</sup>C NMR: (126 MHz, CDCl<sub>3</sub>)

142.3 (C(16)), 137.8 (C(6)), 137.3 (C(6)), 136.9 (C(5)), 135.1 (C(12)), 134.1 (C(13)), 129.5 (C(7)), 128.8 (C(14)), 128.7 (C(17)), 128.4 (C(7)), 128.3 (C(18)), 127.4 (C(15)), 125.7 (C(8)), 125.6 (C(19)), 83.5 (C(10)), 49.7 (C(2)), 35.1 (C(3)), 34.3 (C(1)), 32.7 (C(4)), 24.78 (C(11)), 24.77 (C(11)), 22.3 (C(9)), 21.1 (C(9)).

IR: (neat)

2974 (w), 2921 (w), 1740 (w), 1580 (w), 1480 (w), 1438 (w), 1369 (w), 1322 (w), 1269 (w), 1210 (w), 1136 (w), 1102 (w), 1087 (w), 1028 (w), 998 (w), 965 (w), 915 (w), 891 (w), 856 (w), 846 (w), 778 (w), 753 (w), 739 (w), 704 (w), 687 (w), 618 (w), 577 (w), 551 (w), 516 (w), 487 (w), 474 (w).

LRMS: (ESI, [M+Na]<sup>+</sup>)

173.1 (15), 235.2 (26), 257.2 (67), 437.2 (19), 495.3 (100).

HRMS: calcd for  $\text{C}_{30}\text{H}_{37}\text{BO}_2\text{SNa}$  ( $[\text{M}+\text{Na}]^+$ ): 495.2505, found: 495.2516

Analysis:  $\text{C}_{30}\text{H}_{37}\text{BO}_2\text{S}$  (472.49)

Calcd: C, 76.26%; H, 7.89%

Found: C, 76.26%; H, 7.96%

TLC:  $R_f$  0.55 (hexanes/EtOAc, 90:10, CAM)

Opt. Rot.:  $[\alpha]_{\text{D}}^{24} -61.6$  ( $c = 1.14$  in  $\text{CHCl}_3$ ) (98% ee)

## Determinations of Absolute Configuration

The absolute configuration assignments of (1*S*,2*S*)-**7aa**, (1*S*,2*S*)-**7ab**, (1*S*,2*S*)-**7ac**, (1*S*,2*S*)-**7ad**, (1*S*,2*S*)-**7ae**, (1*S*,2*S*)-**7af**, (1*S*,2*S*)-**7ag**, (3*S*,4*S*)-**7ah**, (1*S*,2*S*)-**7aj**, (1*S*,2*S*)-**7ak**, (1*S*,2*S*)-**7al**, (1*S*,2*S*)-**7am**, (1*S*,2*S*)-**7an**, (1*S*,2*S*)-**7ba**, (1*S*,2*S*)-**10ca**, (1*S*,2*S*)-**10da**, and (1*S*,2*S*)-**7ea** were made on the basis of structural analogy to (1*S*,2*S*)-**7ai** for which an X-ray crystal structure of the precursor borane (1*S*,2*S*)-**6ai** was obtained. The remaining compounds (2*S*,3*S*)-**7ga**, (*S*)-**7ha**, (*S*)-**7ia**, and (1*R*,2*S*)-**7ja** were derivatized to known literature compounds for which the absolute configuration is known unambiguously, as outlined below. No attempt was made to determine the absolute configuration of compound (–)-**7fa**, as its observed enantiomeric purity was low (8% ee).

## Assignment of (2*S*,3*S*)-(+)-2,5-Diphenyl-3-(phenylthio)pentan-2-ol ((2*S*,3*S*)-(+)-**7ga**)

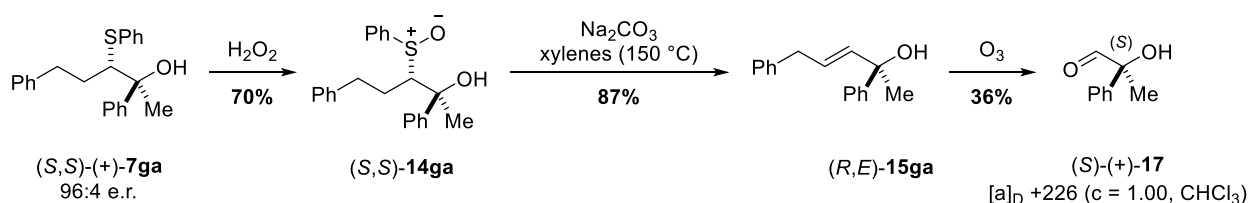

## Step 1: (2*S*,3*S*)-2,5-Diphenyl-3-(phenylsulfinyl)pentan-2-ol ((2*S*,3*S*)-**14ga**)

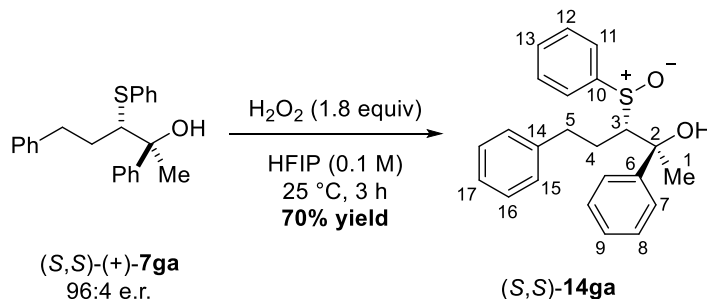

A 25-mL, round-bottomed flask equipped with a stir bar was charged with (+)-**7ga** (120.2 mg, 0.34 mmol) and hexafluoroisopropyl alcohol (3.4 mL). A colorless solution resulted. Hydrogen peroxide (aq. 30% w/w, 63  $\mu\text{L}$ , 1.8 equiv) was added in one portion, and the mixture was stirred at 25  $^\circ\text{C}$  for 3 h. Conversion was assessed by TLC (hexanes/EtOAc, 80:20, CAM). Upon completion, the reaction was quenched by the addition of sat. aq.  $\text{Na}_2\text{SO}_3$  solution (5 mL). The mixture was diluted with diethyl ether and transferred to a separatory funnel. The layers were separated, and the aqueous layer was extracted with  $\text{Et}_2\text{O}$  (3 x 10 mL). The combined organic

extracts were washed with brine, dried over sodium sulfate, filtered, and concentrated to afford 152.5 mg of crude **14ga** as a viscous oil which solidified upon standing. The product was purified by chromatography (silica gel, 2 x 25 cm, dry load on Celite, 10-mL fractions, hexanes/EtOAc, 90:10 (200 mL) to 80:20 (200 mL) to 70:30 (200 mL) to 60:40 (200 mL)) to afford 88.2 mg (70%) of sulfoxide **14ga** as a white powder. Only one sulfoxide diastereomer was observed.

Data for (2*S*,3*S*)-**14ga**:

<sup>1</sup>H NMR: (500 MHz, CDCl<sub>3</sub>)

7.82 – 7.76 (m, 2H, HC(11)), 7.61 – 7.52 (m, 5H, HC(13), HC(12) and HC(7)), 7.41 – 7.34 (m, 2H, HC(8)), 7.33 – 7.28 (m, 1H, HC(9)), 7.12 – 6.98 (m, 3H, HC(16) and HC(17)), 6.41 – 6.35 (m, 2H, HC(15)), 6.01 (s, 1H, OH), 3.02 – 2.96 (m, 1H, HC(3)), 1.97 (s, 3H, H<sub>3</sub>C(1)), 1.52 – 1.44 (m, 1H, H<sub>2</sub>C(4)), 1.33 – 1.23 (m, 2H, H<sub>2</sub>C(4) and H<sub>2</sub>C(5)), 1.23 – 1.13 (m, 1H, H<sub>2</sub>C(5)).

<sup>13</sup>C NMR: (126 MHz, CDCl<sub>3</sub>)

144.9 (C(6)), 142.4 (C(10)), 140.2 (C(14)), 132.4 (HC(13)), 129.6 (HC(12)), 128.5 (HC(15) or HC(16)), 128.4 (HC(15) or HC(16)), 128.1 (HC(8)), 128.0 (HC(9)), 126.6 (HC(7)), 126.5 (HC(11)), 126.2 (HC(17)), 77.7 (C(2)), 72.9 (HC(3)), 34.9 (H<sub>2</sub>C(5)), 28.1 (H<sub>2</sub>C(4)), 23.4 (H<sub>3</sub>C(1)).

HRMS: (ES<sup>+</sup>, TOF)

Calcd for C<sub>23</sub>H<sub>23</sub>OS ([M–OH]<sup>+</sup>): 347.1470, Found: 347.1471

**Step 2: (*R,E*)-2,5-Diphenylpent-3-en-2-ol ((*R,E*)-**15ga**)**

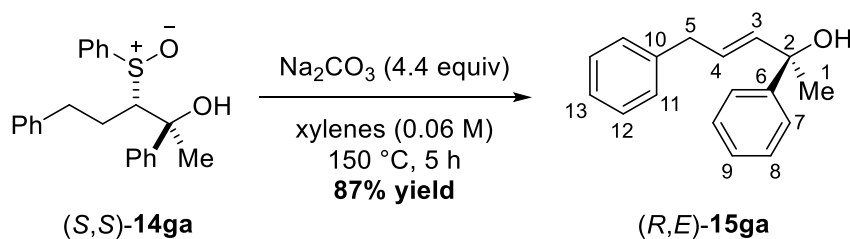

An oven-dried, 25-mL, round-bottomed flask equipped with a stir bar and reflux condenser was charged with sulfoxide **14ga** (87.5 mg, 0.24 mmol), xylenes (4.0 mL), and sodium carbonate (111.3 mg, 1.05 mmol, 4.4 equiv). The colorless suspension was heated to 150 °C for 5 h. Conversion was assessed by TLC (hexanes/EtOAc, 80:20, CAM). Once full conversion was reached, the mixture was cooled to room temperature and directly purified by chromatography

(silica gel, 2 x 25 cm, wet load, 10-mL fractions, hexanes/EtOAc, 95:5 (200 mL) to 90:10 (200 mL) to 85:15 (200 mL)) to afford 52.8 mg (87%) of allylic alcohol **15ga** as a pale, yellow oil. The product contains 6% EtOAc by mass (estimated from relative  $^1\text{H}$  NMR integrations) and this is accounted for in the reported yield.

**Data for (*R,E*)-**15ga**:**

**$^1\text{H}$  NMR:** (500 MHz,  $\text{CDCl}_3$ )

7.49 – 7.45 (m, 2H, HC(7)), 7.36 – 7.32 (m, 2H, HC(8)), 7.31 – 7.27 (m, 2H, HC(12)), 7.26 – 7.19 (m, 2H, HC(9) and HC(13)), 7.19 – 7.16 (m, 2H, HC(11)), 5.91 – 5.82 (m, 2H, HC(3) and HC(4)), 3.41 (d,  $J = 5.1$  Hz, 2H,  $\text{H}_2\text{C}(5)$ ), 1.83 (s, 1H, OH), 1.65 (s, 3H,  $\text{H}_3\text{C}(1)$ ).

**$^{13}\text{C}$  NMR:** (126 MHz,  $\text{CDCl}_3$ )

147.2 (C(6)), 140.3 (C(10)), 138.5 (HC(3)), 128.7 (HC(11)), 128.6 (HC(12)), 128.3 (HC(8)), 127.8 (HC(4)), 127.0 (HC(9)), 126.3 (HC(13)), 125.3 (HC(7)), 74.6 (C(2)), 38.8 ( $\text{H}_2\text{C}(5)$ ), 30.1 ( $\text{H}_3\text{C}(1)$ ).

**HRMS:** ( $\text{ES}^+$ , TOF)

Calcd for  $\text{C}_{17}\text{H}_{17}$  ( $[\text{M}-\text{OH}]^+$ ): 221.1330, Found: 221.1333

**Step 3: (*S*)-(+)-2-Hydroxy-2-phenylpropanal ((*S*)-(+)-**17**)**

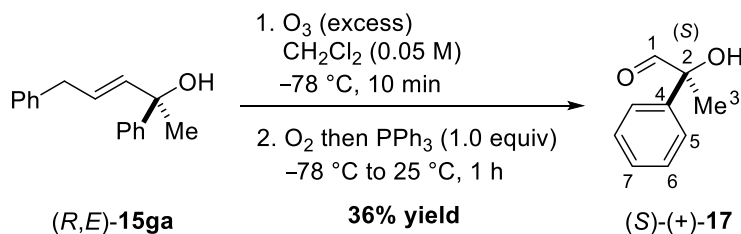

**Note:** A lower-than-expected yield was obtained for this reaction, and multiple unidentified by-products were formed. Given the known ability of ozone to oxidize aromatic rings, in retrospect, a much shorter reaction time (e.g. 1 min rather than 10 min) is advisable.

The following ozonolysis procedure is adapted from a published method.<sup>25</sup> A 15-mL, three necked, round bottomed flask equipped with a gas dispersion bubbler, gas outlet adapter, and glass stopper was charged with **15ga** (50.3 mg, 0.21 mmol) and dichloromethane (4 mL). The resulting colorless solution was cooled to  $-78^\circ\text{C}$  using a dry ice/isopropanol bath. Ozone was bubbled

through the solution via the gas dispersion bubbler, with outlet line running to ozone trap, for 10 min. The solution became a light blue color. Next, the ozone generator was switched off and oxygen was bubbled through the solution for 10 min. The blue color disappeared. Triphenylphosphine (55.4 mg, 0.21 mmol, 1.0 equiv) was added to the colorless solution in one portion at  $-78\text{ }^{\circ}\text{C}$ . The mixture was warmed to  $25\text{ }^{\circ}\text{C}$  and stirred for 1 h. Volatile components were removed by rotary evaporation to afford a colorless residue containing crude **17**. The product was purified by chromatography (silica gel, 2 x 25 cm, dry load on Celite, 10-mL fractions, hexanes/EtOAc, 95:5 (200 mL) to 90:10 (200 mL) to 85:15 (200 mL) to 80:20 (200 mL)) to afford 15.2 mg (36%) of aldehyde **17** as a pale, yellow oil. Spectroscopic data matched those previously reported.<sup>26</sup> The product contains 15% EtOAc by mass (estimated from relative  $^1\text{H}$  NMR integrations), as well as multiple unidentified impurities present in trace amounts. The presence of  $^1\text{H}$  NMR signals unrelated to **17** is particularly evident in the aryl region. The purity of **17** is conservatively estimated as 75% by weight, and this is accounted for in the reported yield.

Data for (S)-(+)-**17**:

$^1\text{H}$  NMR: (500 MHz,  $\text{CDCl}_3$ )

9.56 (d,  $J = 1.1\text{ Hz}$ , 1H, HC(1)), 7.49 – 7.45 (m, 2H, HC(5)), 7.43 – 7.39 (m, 2H, HC(6)), 7.36 – 7.31 (m, 1H, HC(7)), 3.82 (d,  $J = 1.1\text{ Hz}$ , 1H, OH), 1.71 (s, 3H,  $\text{H}_3\text{C}(3)$ ).

$^{13}\text{C}$  NMR: (126 MHz,  $\text{CDCl}_3$ )

199.9 (HC(1)), 139.3 (C(4)), 129.0 (HC(6)), 128.3 (HC(7)), 125.9 (HC(5)), 79.2 (C(2)), 23.8 ( $\text{H}_3\text{C}(3)$ ).

HRMS: ( $\text{ES}^+$ , TOF)

Calcd for  $\text{C}_9\text{H}_9\text{O}_2$  ( $[\text{M}-\text{H}]^+$ ): 149.0603, Found: 149.0603

Opt. Rot:  $[\alpha]_{\text{D}}^{24} + 226$  ( $c = 1.00$  in  $\text{CHCl}_3$ ) (92% ee)

Because of the aforementioned uncertainty in the purity of **17**, a small uncertainty also exists in the magnitude of the calculated specific rotation. Despite this, the positive sign of rotation is unambiguous. It has been well-established in the literature that (–)-**17** has the (*R*) configuration<sup>26-29</sup> and (+)-**17** has the (*S*) configuration.<sup>30-31</sup> Therefore, it can be stated with certainty that the carbinol stereogenic center in (+)-**7ga** also has the (*S*) configuration, so the absolute configuration of (2*S*,3*S*)-(+)-**7ga** may be assigned.

**Note:** In the course of compiling reported specific rotations of (+)-**17** and (–)-**17** it became clear that the magnitude of specific rotation is heavily concentration dependent in both chloroform and benzene. Reported magnitudes of  $[\alpha]_D$  are closer to 250 for sample concentrations of 1.00 g/dL or greater,<sup>26, 28, 30</sup> and closer to 150 for sample concentrations of 0.75 g/dL or lower.<sup>27, 29, 31</sup>

**Assignment of (S)-(-)-2-Phenyl-1-(phenylthio)propan-2-ol ((S)-(-)-**7ha**)**

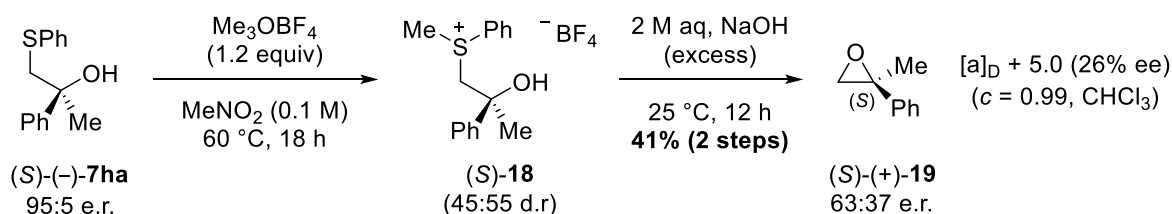

**Note:** Substantial racemization of the oxygen-bearing stereogenic center was observed over this two-step protocol, which likely occurred during treatment of (S)-**7ha** with Meerwein salt in nitromethane at high temperatures for an extended period of time. In retrospect, a milder procedure is recommended (dichloromethane, 25 °C, 2 h).<sup>32</sup>

Reasonable mechanism for racemization:

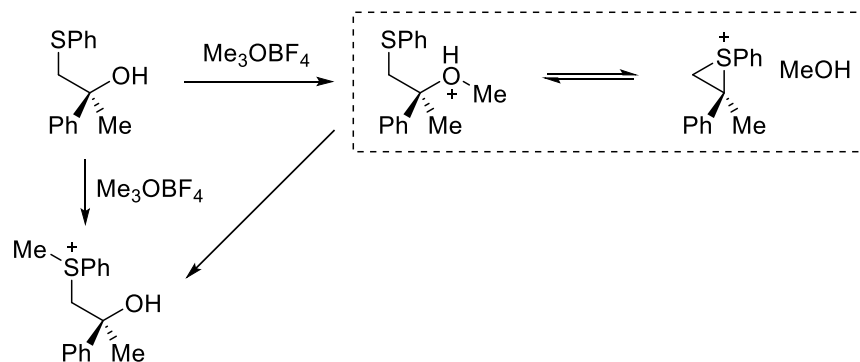

The following methylation procedure is adapted from previously published literature.<sup>33</sup> An oven-dried, 5-mL, round-bottomed flask equipped with a stir bar and reflux condenser was charged with (–)-**7ha** (51.7 mg, 0.21 mmol, 95:5 e.r.), nitromethane (2.0 mL), and trimethyloxonium tetrafluoroborate (38.1 mg, 0.26 mmol, 1.22 equiv). The solution was heated to 60 °C for 18 h. Upon initial heating, a pale, pink suspension resulted, which eventually became a pink-yellow solution after several hours of heating. The reaction mixture was cooled to room temperature and

diluted with methanol (5 mL). Volatile components were removed by rotary evaporation (30 °C, 15 mm Hg) to afford 80.5 mg of crude sulfonium salt **18** as a pink-yellow gum. This intermediate was isolated in 45:55 d.r. and the crude material was directly subjected to the next reaction.

The following procedure is adapted from previously published literature.<sup>34</sup> Compound **18** was suspended in aq. NaOH (2 M, 4 mL) and the mixture was stirred for 12 h at 25 °C. The resulting pale, yellow solution containing orange-brown oil was diluted with water (10 mL) and extracted with Et<sub>2</sub>O (3 x 10 mL). The combined organic extracts were washed with brine, dried over sodium sulfate, filtered, and concentrated (25 °C, 100 mm Hg) to afford 53.2 mg of crude oxirane (+)-**19**. The product was purified by chromatography (silica gel, 2 x 25 cm, dry load on Celite, 10-mL fractions, pentane/Et<sub>2</sub>O/Et<sub>3</sub>N, 98:2:0.5) to afford 11.6 mg (41% yield over two steps) of 2-methyl-2-phenyloxirane (+)-**19** as a colorless oil. Spectroscopic data for (+)-**19** matched those previously reported.<sup>35</sup>

Data for (S)-(+)-**19**:

<sup>1</sup>H NMR: (500 MHz, CDCl<sub>3</sub>)

7.39 – 7.31 (m, 4H), 7.30 – 7.26 (m, 1H), 2.98 (d, *J* = 5.4 Hz, 1H), 2.81 (d, *J* = 5.4 Hz, 1H), 1.72 (s, 3H).

Opt. Rot: [ $\alpha$ ]<sub>D</sub><sup>24</sup> + 5.0 (*c* = 0.99 in CHCl<sub>3</sub>) (26% ee)

HPLC: *t*<sub>R</sub> 9.4 min (37%); *t*<sub>R</sub> 10.3 min (63%) (Supelco Astec, hexanes/*i*-PrOH, 95:5, 0.5 mL/min, 220 nm, 24 °C)

Despite substantial racemization (*vide supra*), the oxirane **19** was isolated in 41% yield over two steps with 26% ee and a positive sign of rotation. It has been well-established in the literature that (+)-**19** has the (*S*) configuration.<sup>35-36</sup> Therefore, it can be stated with certainty that the carbinol stereogenic center in (–)-**7ha** also has the (*S*) configuration.

**Assignment of (*S*)-(-)-1-Phenyl-2-(phenylthio)ethan-1-ol ((*S*)-(-)-**7ia**)**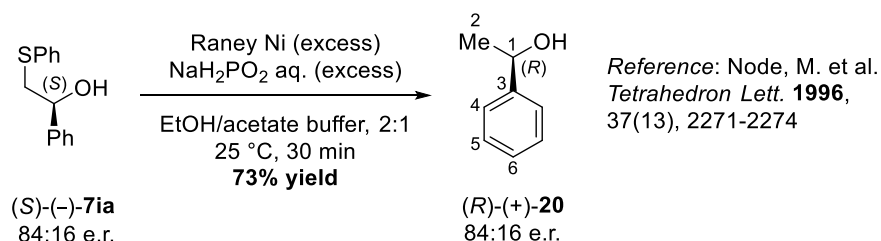

While most literature sources report an (*S*) configuration for known compound (-)-**7ia**, at least one discrepancy was encountered.<sup>37</sup> Therefore, it was deemed prudent to reduce (-)-**7ia** to 1-phenylethan-1-ol **20** to confirm the sign of rotation, using the following procedure described by Node et al. for the exact transformation shown above.<sup>38-39</sup> A scintillation equipped with a stir bar was charged with compound (-)-**7ia** (14.7 mg, 0.064 mmol), ethanol (3 mL) and aq. acetate buffer (1.5 mL, pH ~5.2). A clear, colorless solution resulted. A suspension of Raney nickel (2.5 mL, aq.) was added to the vial in one portion, *followed immediately* by a solution of sodium hypophosphite hydrate (NaH<sub>2</sub>PO<sub>2</sub>·H<sub>2</sub>O) in water (157.3 mg in 1 mL) in one portion. A slight exotherm and mild gas evolution was observed. The dark suspension was stirred at 25 °C for 30 min. Full conversion was observed by TLC (hexanes/EtOAc, 80:20). The suspension was filtered through a pad of Celite (2 cm) to remove nickel, and the pad was rinsed with ethanol (5 mL) and water (5 mL). **[Caution:** Raney nickel is a pyrophoric solid and should not be allowed to dry out completely. After the final rinse, scoop the wet cake into a waste container and store underwater.] The filtrate was partitioned between water (15 mL) and dichloromethane (25 mL). The layers were separated, and the aqueous phase was extracted with dichloromethane (2 x 10 mL). The combined organic extracts were washed with brine, dried over magnesium sulfate, filtered, and concentrated (15 mm Hg, 35 °C, 20 min) to afford 1-phenylethan-1-ol **20** (5.7 mg, 73%) as an oil.

**Data for (*R*)-(+)-**20**:**

**<sup>1</sup>H NMR:** (500 MHz, CDCl<sub>3</sub>)

7.42 – 7.32 (m, 4H, HC(4) and HC(5)), 7.31 – 7.27 (m, 1H, HC(6)), 4.91 (q, *J* = 6.4 Hz, 1H, HC(1)), 1.76 (s, 1H, OH), 1.51 (d, *J* = 6.5 Hz, 3H, H<sub>3</sub>C(2)).

**<sup>13</sup>C NMR:** (126 MHz, CDCl<sub>3</sub>)

146.0 (C(3)), 128.7 (HC(5)), 127.6 (HC(6)), 125.5 (HC(4)), 70.6 (HC(1)), 25.3 (H<sub>3</sub>C(2)).

**HPLC:**  $t_R$  13.5 min (84%);  $t_R$  15.1 min (16%) (Supelco Astec, hexanes/*i*-PrOH, 90:10, 0.5 mL/min, 220 nm, 24 °C)

Given that the isolated material **20** was: (1) present in less than 6 mg, (2) not enantiomerically pure, and (3) appeared from  $^1\text{H}$  NMR to be contaminated with grease, it was decided that measurement of optical rotation would be unsatisfactory proof of configuration, as the magnitude of observed rotation of the sample would be very small and carry a degree of uncertainty. Instead, the isolated **20** was analyzed by chiral stationary phase HPLC. Comparison of this HPLC trace with those obtained from enantiomerically pure, commercial samples of (*R*)-(+)-**20** and (*S*)-(–)-**20** (*vide infra*) provide unambiguous proof that the isolated **20** from this experiment is of the (*R*)-(+) configuration. Therefore, it can be stated with certainty that the carbinol stereogenic center in (–)-**7ia** is of the (*S*) configuration (Cahn-Ingold-Prelog convention changes due to presence/absence of sulfur atom). This is in agreement with most literature reports.<sup>39-43</sup>

(±)-**20** (commercial sample) \* Contaminated with acetophenone ( $t_R$  11.0 min)

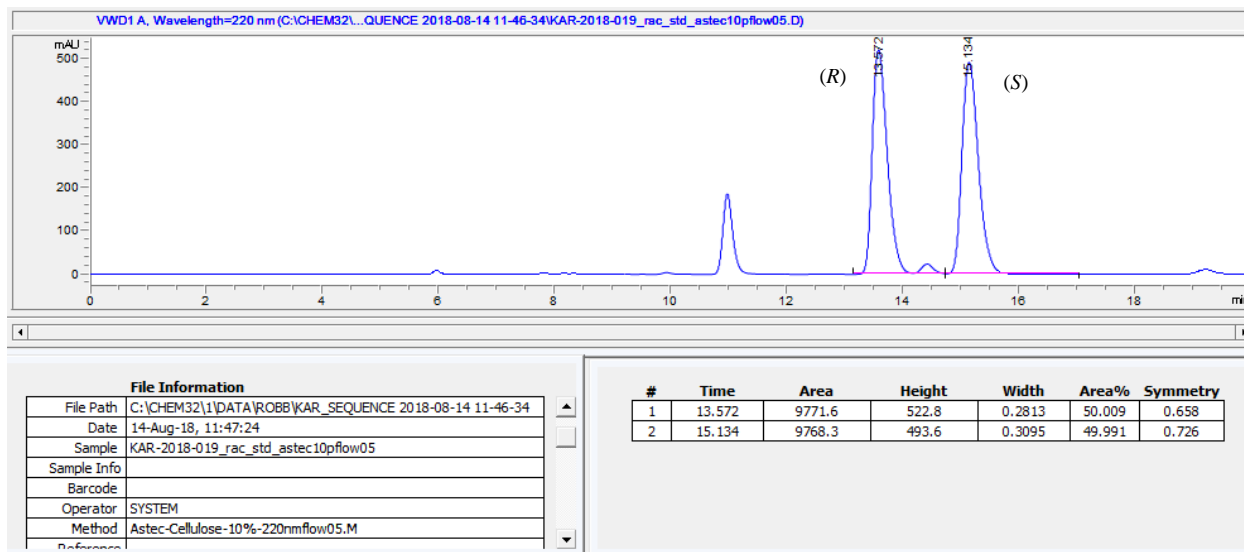

(R)-(+)-**20** (commercial sample) \* Contaminated with acetophenone ( $t_R$  11.0 min)

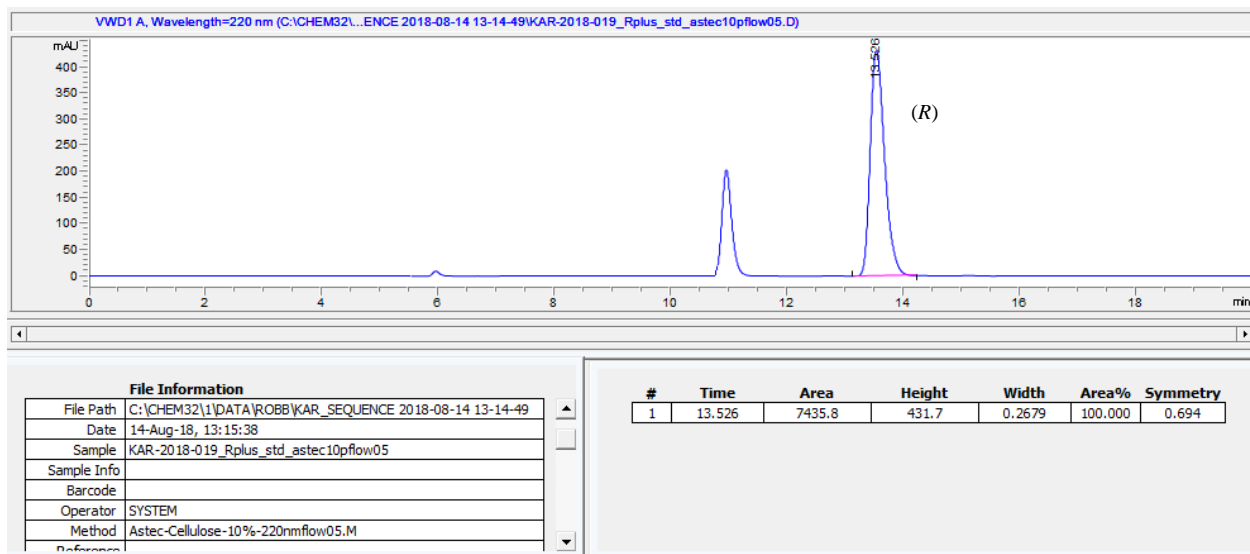

(S)-(-)-**20** (commercial sample)

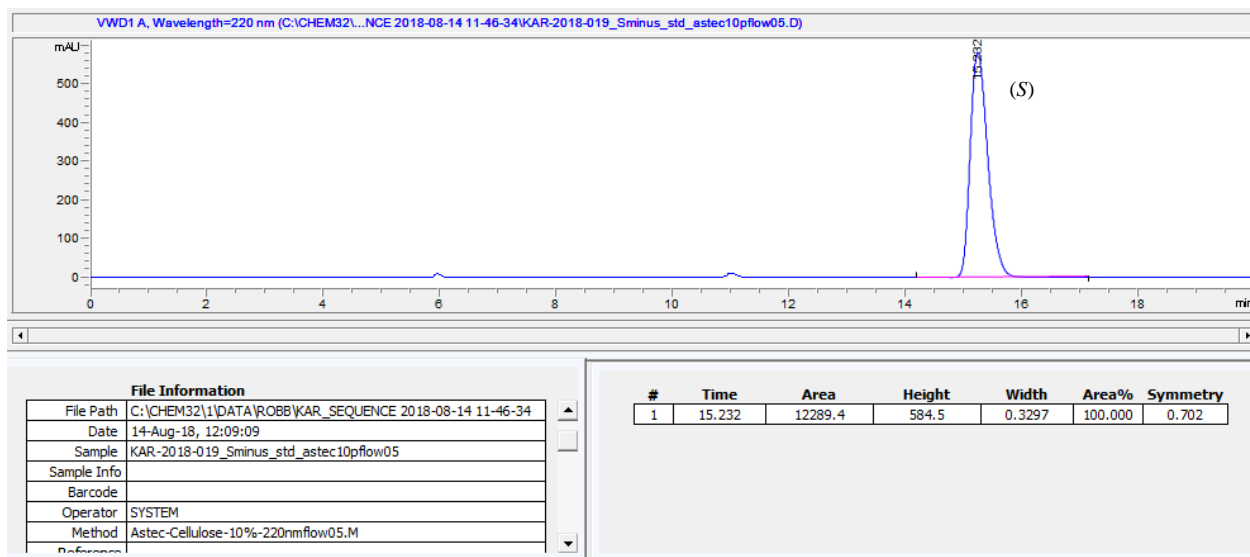

Reduction of (*S*)-(-)-**7ia** to **20**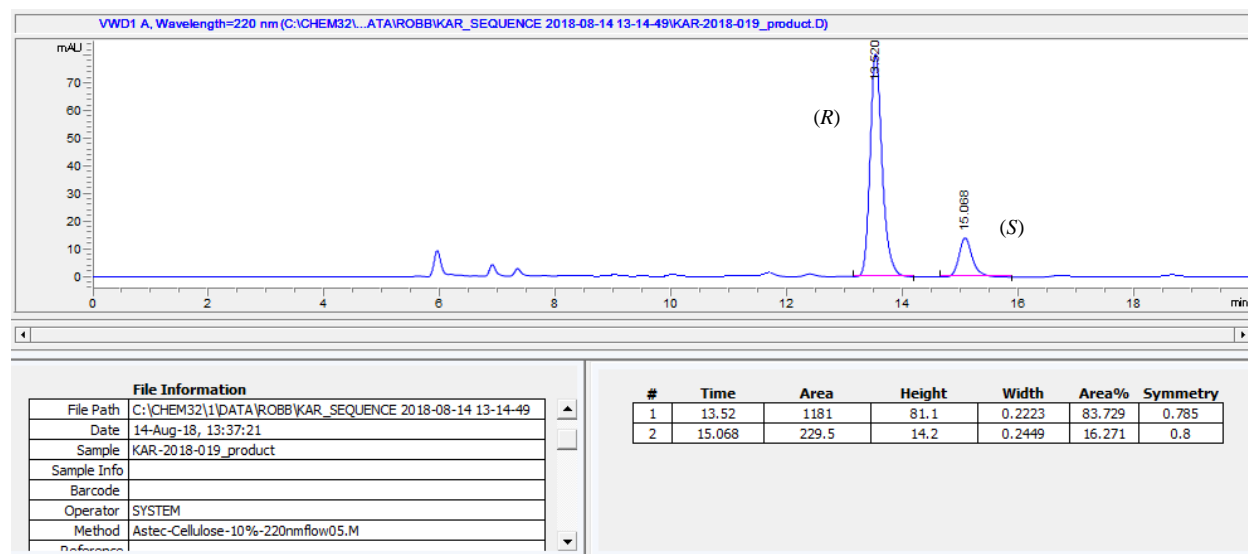Assignment of (1*R*,2*S*)-(+)-1,4-Diphenyl-2-(phenylthio)butan-1-ol ((1*R*,2*S*)-(+)-**7ja**)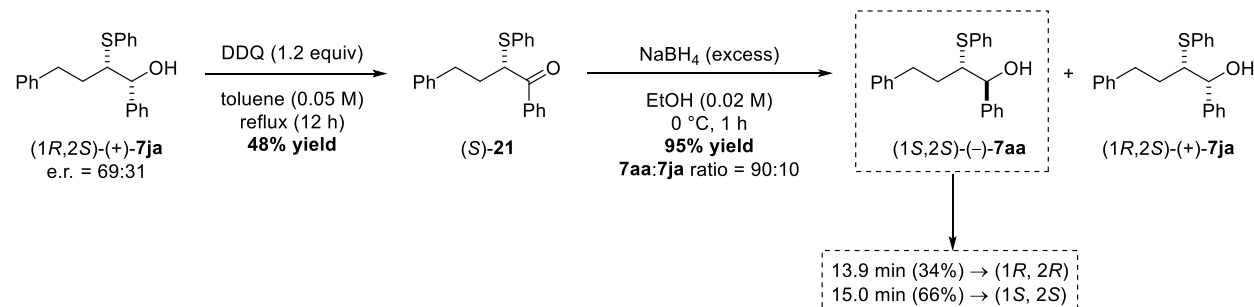

The strategy for assigning the absolute configuration of (+)-**7ja** was as follows. Oxidation of (+)-**7ja** to ketone **21**, followed by reduction with sodium borohydride affords a mixture of **7ja** and **7aa**, in which the stereochemistry of the sulfur-bearing carbon atom has been retained. The absolute configuration of **7aa** has already been established and the order of elution of (*1R*,2*R*)-**7aa** and (*1S*,2*S*)-**7aa** on chiral stationary phase HPLC is already known (pp. S9 – S11). Therefore, the stereochemistry of the sulfur-bearing carbon in (+)-**7ja** can be inferred by a comparison of the HPLC trace of **7aa** formed by this oxidation-reduction sequence with the HPLC trace of enantiomerically enriched (*S,S*)-(-)-**7aa** formed previously. The stereochemistry of the oxygen-bearing carbon in (+)-**7ja** can then be inferred on the basis of the *anti* diastereomeric relationship.

**Step 1: (*S*)-1,4-Diphenyl-2-(phenylthio)butan-1-one ((*S*)-**21**)**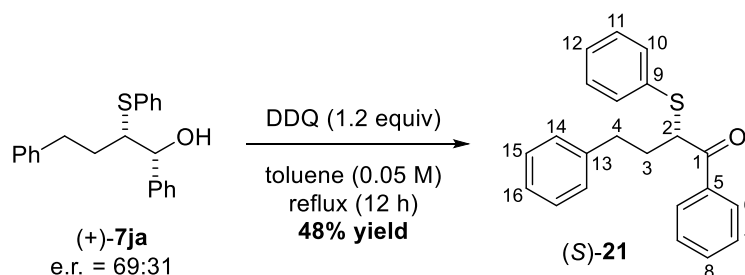

An oven-dried, 5 mL, round-bottomed flask equipped with a stir bar and reflux condenser was charged with alcohol (+)-**7ja** (36.4 mg, 0.11 mmol) and toluene (2 mL). To this clear, colorless solution was added 2,3-dichloro-5,6-dicyano-p-benzoquinone (DDQ) (30.2 mg, 0.13 mmol, 1.2 equiv). The resulting red-colored solution was heated to reflux for 12 h. Conversion was monitored by TLC (hexanes/EtOAc, 90:10). Upon completion, the mixture was cooled to 25 °C and volatile components were removed by rotary evaporation (15 mm Hg, 35 °C). The residue was purified by column chromatography (silica gel, 2 x 25 cm, dry load on Celite, 10-mL fractions, hexanes/EtOAc, 97.5:2.5 (200 mL) to 95:5 (200 mL) to 92.5:7.5 (200 mL) to 90:10 (200 mL)) to afford 17.4 mg (48%) of ketone **21** as an oil.

**Data for (*S*)-**21**:**

**<sup>1</sup>H NMR:** (500 MHz, CDCl<sub>3</sub>)

7.86 – 7.82 (m, 2H, HC(6)), 7.59 – 7.49 (m, 1H, HC(8)), 7.45 – 7.39 (m, 2H, HC(7)), 7.32 – 7.23 (m, 7H, HC(10), HC(11), HC(12), and HC(15)), 7.22 – 7.18 (m, 1H, HC(16)), 7.17 – 7.13 (m, 2H, HC(14)), 4.40 (t, *J* = 7.2 Hz, 1H, HC(2)), 2.86 – 2.72 (m, 2H, H<sub>2</sub>C(4)), 2.39 – 2.30 (m, 1H, H<sub>2</sub>C(3)), 2.18 – 2.10 (m, 1H, H<sub>2</sub>C(3)).

**<sup>13</sup>C NMR:** (126 MHz, CDCl<sub>3</sub>)

195.7 (C(1)), 141.1 (C(13)), 136.3 (C(5)), 134.7 (HC<sub>om</sub>), 133.2 (HC(8)), 131.7 (C(9)), 129.1 (HC<sub>om</sub>), 128.8 (HC(12)), 128.73 (HC<sub>om</sub>), 128.71 (HC<sub>om</sub>), 128.68 (HC<sub>om</sub>), 128.6 (HC<sub>om</sub>), 126.3 (HC(16)), 50.3 (HC(2)), 33.3 (H<sub>2</sub>C(4)), 32.5 (H<sub>2</sub>C(3)).

Deconvolution of the *ortho* and *meta* (HC<sub>om</sub>) signals was not possible.

**Step 2: Reduction of (S)-21 to mixture of (1S,2S)-7aa and (1R,2S)-7ja**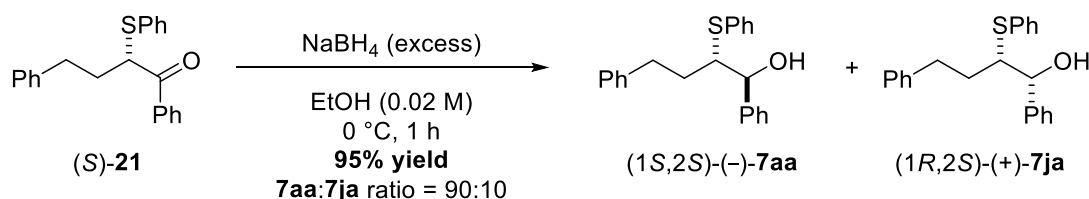

A scintillation vial equipped with a stir bar was charged with ketone **21** (16.6 mg, 0.050 mmol) and ethanol (2 mL). The resulting clear, colorless solution was cooled to 0 °C with an ice bath. Sodium borohydride (41.2 mg, 1.09 mmol, 22 equiv) was added in one portion and the reaction was stirred for 20 min at 0 °C. Conversion was assessed by TLC (hexanes/EtOAc, 90:10). Upon reaching full conversion, the reaction was quenched by the cautious, dropwise addition of sat. aq. ammonium chloride until gas evolution ceased. The mixture was diluted with water (10 mL) and Et<sub>2</sub>O (10 mL) and transferred to a separatory funnel. The layers were separated, and the aqueous layer was extracted with Et<sub>2</sub>O (2 x 10 mL). The combined organic extracts were washed with brine, dried over sodium sulfate, filtered, and concentrated. The residue was purified by column chromatography (silica gel, 1 x 16 cm, dry load on Celite, 5-mL fractions, hexanes/EtOAc, 90:10 (100 mL) to 80:20 (100 mL)) to afford 15.8 mg (95%) of a mixture of **7aa** and **7ja**. The diastereomeric ratio, determined by relative <sup>1</sup>H NMR integrations, was 90:10 **7aa**:**7ja**. Spectroscopic data for **7aa** and **7ja** match those reported earlier (pp. S9–S11 and S68–S70).

Data for **7aj**:

HPLC:  $t_R$  12.5 min (both enantiomers) (Supelco Astec, hexanes/*i*-PrOH, 80:20, 0.5 mL/min, 220 nm, 24 °C)

Data for **7aa**:

HPLC:  $t_R$  13.9 min (34%);  $t_R$  15.0 min (66%) (Supelco Astec, hexanes/*i*-PrOH, 80:20, 0.5 mL/min, 220 nm, 24 °C)

HPLC analysis of this mixture indicated a 66:34 enantiomeric ratio for **7aa**, with the major enantiomer eluting second (*vide infra*). This matches the elution order for (1S,2S)-**7aa** synthesized earlier (pp. S9 – S11). Therefore, it can be stated with certainty that the absolute configuration of (+)-**7ja** is (1R,2S).

Reduction of **21** to **7aa** and **7aj** (mixture)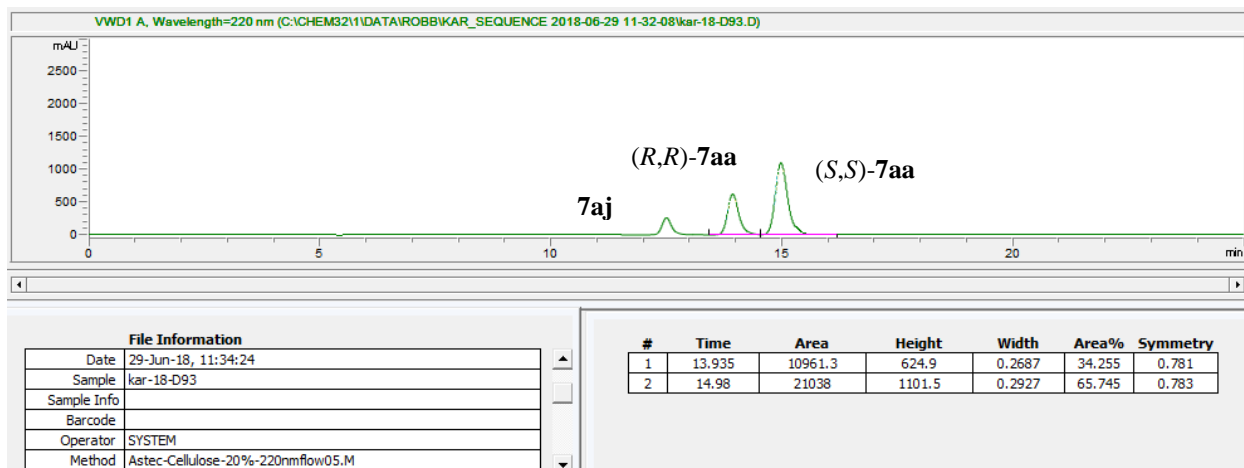(1*S*,2*S*)-(-)-**7aa** (98:2 e.r.) prepared previously (pp. S9 – S11)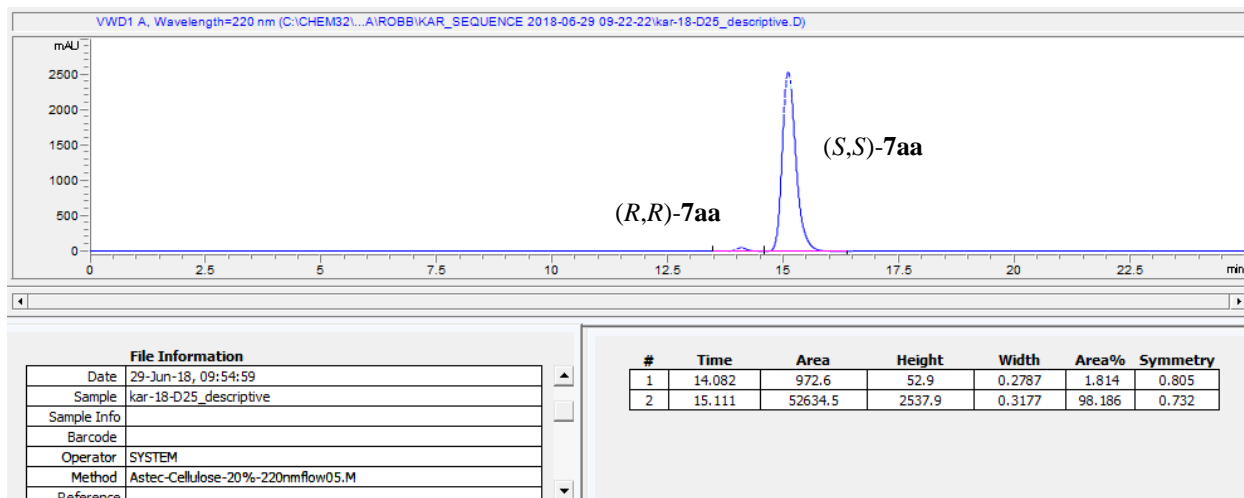*(rac)*-**7aa**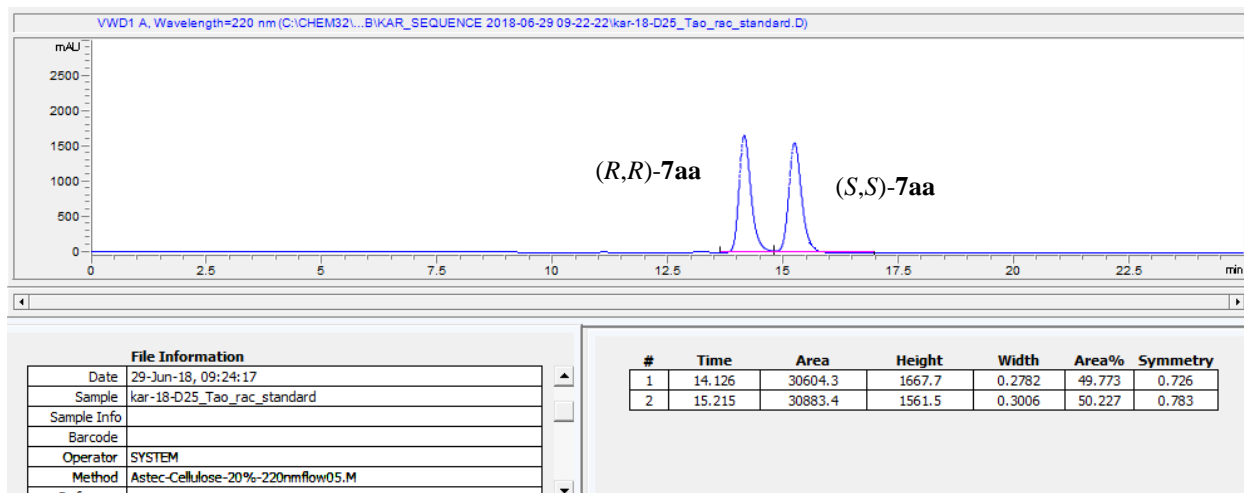

(1*R*,2*S*)-(+)-**7ja** (68:32 e.r.) prepared previously (pp. S67–S70). Under these HPLC conditions, both enantiomers co-elute.

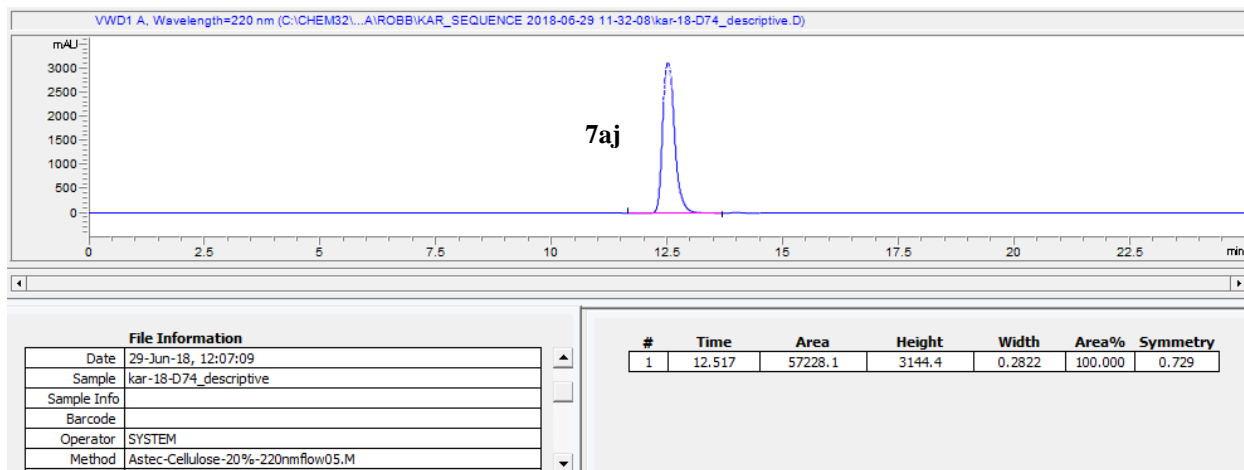

## Product Manipulations

### Preparation of (*R*)-2-(1,4-Diphenylbutyl)-pinacolborane ((*R*)-(-)-11aa)

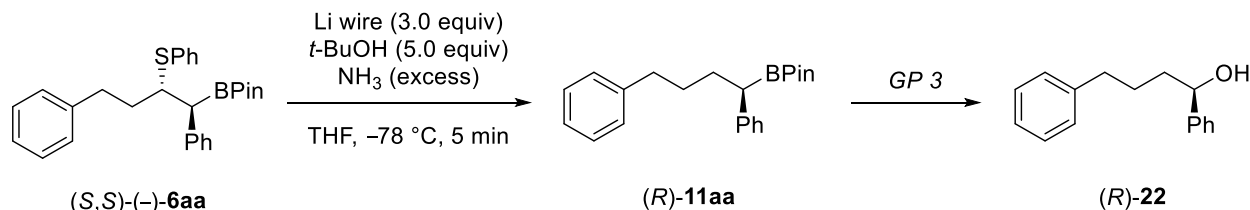

An oven-dried, 100-mL, three necked, round-bottomed flask equipped with a glass-coated stir bar, argon inlet adapter, dry ice condenser, and rubber septum was cooled to  $-78\text{ }^{\circ}\text{C}$  using a dry ice/acetone bath. Ammonia (approx. 20 mL) was condensed into the flask. Neat *tert*-butanol (475  $\mu\text{L}$ , 5.0 mmol, 5.0 equiv) was added to the flask by syringe (should be done quickly to avoid freezing inside the syringe). A solution of **6aa** (444.5 mg, 1.0 mmol) in THF (5 mL) was added dropwise, and mixture was stirred for 15 min at  $-78\text{ }^{\circ}\text{C}$ . A single piece of freshly cut lithium wire (21.0 mg, 3.0 mmol, 3.0 equiv) was added to the flask under a stream of argon. The colorless mixture was stirred rapidly at  $-78\text{ }^{\circ}\text{C}$  until a dark green solution was observed (typically requires less than 5 min). **As soon as the solution color turned dark green, the reaction was quenched immediately** by the addition of sat. aq.  $\text{NH}_4\text{Cl}$  (1 mL). The green color disappeared upon quenching, and the resulting colorless solution was warmed to  $25\text{ }^{\circ}\text{C}$  and stirred for an additional 10 min. The mixture was further diluted with sat. aq.  $\text{NH}_4\text{Cl}$  (20 mL) and water (40 mL), transferred to a separatory funnel, and extracted with  $\text{Et}_2\text{O}$  (4 x 50 mL). The combined organic extracts were washed with brine (50 mL), dried over magnesium sulfate, filtered, and concentrated ( $30\text{ }^{\circ}\text{C}$ , 25 mmHg) to afford crude **11aa**. The product was purified by column chromatography (silica gel, 3 x 25 cm, dry load on Celite, 25-mL fractions, hexanes/ $\text{EtOAc}$  gradient elution: 97.5:2.5 (600 mL) to 95:5 (600 mL)) to afford 291.2 mg (87%) of **11aa** as a colorless oil. Spectroscopic data matched those reported previously.<sup>44</sup>

#### Data for (*R*)-(-)-**11aa**:

$^1\text{H}$  NMR: (500 MHz,  $\text{CDCl}_3$ )

7.28 – 7.22 (m, 4H), 7.20 (d,  $J = 6.9\text{ Hz}$ , 2H), 7.18 – 7.11 (m, 4H), 2.69 – 2.54 (m, 2H), 2.34 (t,  $J = 7.9\text{ Hz}$ , 1H), 1.96 – 1.86 (m, 1H), 1.77 – 1.68 (m, 1H), 1.61 (p,  $J = 8.0\text{ Hz}$ , 2H), 1.21 (s, 6H), 1.19 (s, 6H).

$^{13}\text{C}$  NMR: (126 MHz,  $\text{CDCl}_3$ )

143.3, 142.8, 128.5, 128.5, 128.4, 128.3, 125.7, 125.3, 83.4, 36.1, 32.4, 31.2, 24.8, 24.7.

HRMS: calcd for C<sub>22</sub>H<sub>30</sub>BO<sub>2</sub> ([M+H]<sup>+</sup>): 337.2399, found: 337.2354

Opt. Rot.: [ $\alpha$ ]<sub>D</sub><sup>24</sup> -22.6 (*c* = 2.5 in CHCl<sub>3</sub>) (94% ee)

### Oxidation of **11aa**

**11aa** was oxidized to alcohol **22** according to *GP3* for analysis of enantiomeric composition. A 25-mL round-bottomed flask equipped with a stir bar was charged with **11aa** (49.7 mg, 0.15 mmol) and THF (1 mL). The turbid solution was cooled to 0 °C with an ice bath. To this solution was added a mixture of 30% aq. H<sub>2</sub>O<sub>2</sub> (0.25 mL) and 3 M aq. NaOH (0.5 mL) also containing EDTA (1.0 mg/mL). The biphasic mixture was stirred rapidly at 0 °C and conversion was monitored by TLC (hexanes/EtOAc, 90:10, CAM). Once full conversion was observed, the oxidation was quenched by the addition of sat. aq. sodium thiosulfate (Na<sub>2</sub>S<sub>2</sub>O<sub>3</sub>) solution (10 mL) and stirred for 15 min. The mixture was transferred to a separatory funnel and diluted with diethyl ether (30 mL). The layers were separated, and the aqueous layer was extracted with diethyl ether (3 x 15 mL). The combined organic phases were washed with brine (25 mL) and then dried over magnesium sulfate, filtered, and concentrated (30 °C, 15 mmHg) to afford crude alcohol **22**. The product was purified by chromatography (silica gel, 2 x 20 cm, dry load on Celite, 10-mL fractions, hexanes/EtOAc, 90:10 (400 mL)) to afford 30.2 mg (90%) of pure alcohol **22** as a colorless oil. Spectroscopic data matched those previously reported.<sup>45</sup>

#### Data for (*R*)-**22**:

<sup>1</sup>H NMR: (500 MHz, CDCl<sub>3</sub>)

7.24 – 7.17 (m, 4H), 7.17 – 7.11 (m, 3H), 7.07 – 7.01 (m, 3H), 4.55 (dd, *J* = 7.5, 5.0 Hz, 1H), 2.51 (t, *J* = 7.3 Hz, 2H), 1.19 – 1.68 (m, 2H, including OH), 1.68 – 1.58 (m, 2H), 1.55 – 1.43 (m, 1H).

<sup>13</sup>C NMR: (126 MHz, CDCl<sub>3</sub>)

144.8, 142.4, 128.6, 128.5, 128.4, 127.7, 126.0, 125.9, 74.7, 38.7, 35.9, 27.7.

HPLC: (*R*)-**22**, *t*<sub>R</sub> 17.5 min (97%); (*S*)-**22**, *t*<sub>R</sub> 20.4 min (3%) (Supelco Astec, hexanes/*i*-PrOH, 80:20, 0.5 mL/min, 220 nm, 24 °C)

**Preparation of (S)-(1,4-Diphenylbutan-2-yl)pinacolborane ((S)-**12aa**) and (S)-1,4-Diphenylbutan-2-ol ((S)-**23**)**

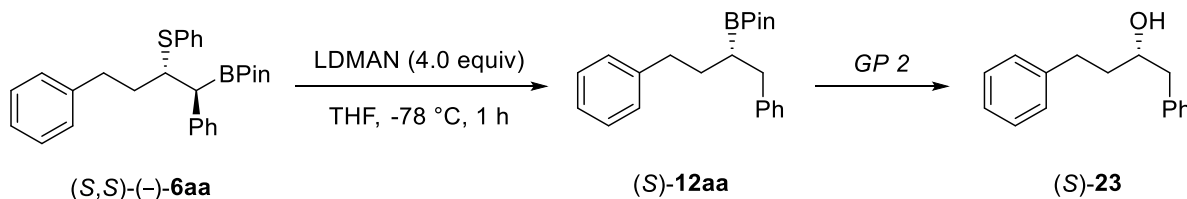

A flame-dried, 50-mL Schlenk flask equipped with a glass-coated stir bar was charged with THF (10 mL) and freshly cut lithium wire (28.0 mg, 4.0 mmol, 4.0 equiv). The mixture was cooled to  $-55\text{ }^{\circ}\text{C}$  using a Cryo-Cool. Neat *N,N*-dimethylnaphthalen-1-amine (656  $\mu\text{L}$ , 4.0 mmol, 4.0 equiv) was added dropwise by syringe, and the mixture was stirred at  $-55\text{ }^{\circ}\text{C}$  for 5 h. Over time, a dark green solution was observed, indicating formation of the LDMAN reagent. A solution of **6aa** (444.5 mg, 1.0 mmol) in THF (10 mL) was added dropwise to the LDMAN solution, and the mixture was stirred at  $-55\text{ }^{\circ}\text{C}$  for 1 h. The reaction was quenched by the addition of sat. aq.  $\text{NH}_4\text{Cl}$  (1 mL). The green color disappeared upon quenching, and the resulting colorless solution was warmed to  $25\text{ }^{\circ}\text{C}$  and stirred for an additional 10 min. The mixture was further diluted with aq. 1 N HCl (20 mL), transferred to a separatory funnel, and extracted with  $\text{Et}_2\text{O}$  (4 x 50 mL). The combined organic extracts were washed with brine (50 mL), dried over magnesium sulfate, filtered, and concentrated ( $30\text{ }^{\circ}\text{C}$ , 25 mmHg) to afford crude **12aa**. The product was purified by column chromatography (silica gel, 3 x 25 cm, dry load on Celite, 25-mL fractions, hexanes/ $\text{EtOAc}$ , 95:5 (1000 mL)) to afford pure **12aa**<sup>46</sup> which was fully characterized by oxidation to alcohol **23**.

Borane **12aa** was oxidized to alcohol **23** according to GP2. A 50-mL, round-bottomed flask equipped with a stir bar was charged with **12aa**, THF (6 mL) and water (6 mL). Sodium perborate tetrahydrate (369.3 mg) was added to the mixture at  $25\text{ }^{\circ}\text{C}$ . The mixture was stirred rapidly at  $25\text{ }^{\circ}\text{C}$  for 3 h. The oxidation was quenched by the addition of sat. aq. sodium thiosulfate ( $\text{Na}_2\text{S}_2\text{O}_3$ ) solution (10 mL), and the mixture was stirred for 15 min at  $25\text{ }^{\circ}\text{C}$ . The mixture was extracted with  $\text{Et}_2\text{O}$  (3 x 30 mL), and the combined organic phases were dried over magnesium sulfate, filtered, and concentrated to afford alcohol **23**. The product was purified by column chromatography (silica gel, 2 x 12 cm, dry load on Celite, 10-mL fractions, hexanes/ $\text{EtOAc}$  gradient elution: 95:5 (300 mL) to 90:10 (300 mL)) to afford 100.0 mg (44%) of pure **23**. Spectroscopic data matched those reported previously.<sup>47-48</sup> The absolute configuration of (S)-**23** was assigned by comparing the sign

of optical rotation to the values reported previously.

**Data for (*S*)-**23**:**

**<sup>1</sup>H NMR:** (500 MHz, CDCl<sub>3</sub>)

7.34 – 7.27 (m, 4H), 7.25 (d, *J* = 7.3 Hz, 1H), 7.23 – 7.17 (m, 5H), 3.90 – 3.80 (m, 1H), 2.92 – 2.80 (m, 2H), 2.76 – 2.66 (m, 2H), 1.92 – 1.77 (m, 2H), 1.59 (s, 1H).

**<sup>13</sup>C NMR:** (126 MHz, CDCl<sub>3</sub>)

142.2, 138.5, 129.6, 128.7, 128.6, 128.5, 126.6, 126.0, 72.1, 44.3, 38.6, 32.2.

**IR:** (neat)

3392 (w), 3061 (w), 3026 (w), 2924 (w), 2859 (w), 1602 (w), 1494 (w), 1453 (w), 1179 (w), 1080 (w), 1047 (w), 1030 (w), 908 (w), 857 (w), 731 (m), 697 (m), 647 (w), 613 (w), 526 (w), 492 (w).

**HPLC:** (*S*)-**23**, *t*<sub>R</sub> 7.4 min (82%); (*R*)-**23**, *t*<sub>R</sub> 9.8 min (18%) (IB-3, hexanes/*i*-PrOH, 90:10, 0.5 mL/min, 220 nm, 24 °C)

**Opt. Rot.:** [ $\alpha$ ]<sub>D</sub><sup>24</sup> –11.0 (*c* = 1.76 in CHCl<sub>3</sub>)<sup>47-48</sup> (64% ee)

**Preparation of (1,4-Diphenylbutane-1,2-diyl)bis(pinacolborane) (**13aa**)**

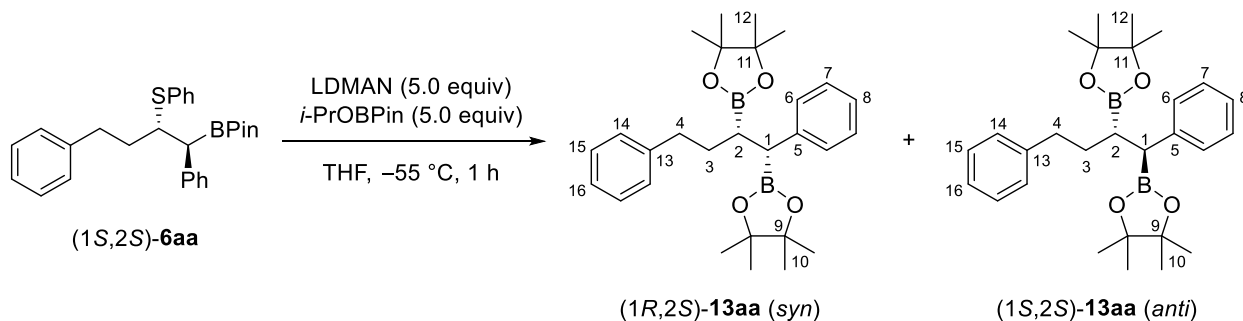

A flame-dried, 50-mL Schlenk flask equipped with a glass-coated stir bar was charged with THF (5 mL) and freshly cut lithium wire (35.0 mg, 5.0 mmol, 5.0 equiv). The mixture was cooled to –55 °C using a Cryo-Cool. Neat *N,N*-dimethylnaphthalen-1-amine (820  $\mu$ L, 5.0 mmol, 5.0 equiv) was added dropwise by syringe, and the mixture was stirred at –55 °C for 5 h. Over time, a dark green solution was observed, indicating formation of the LDMAN reagent. A solution of **6aa** (444.5 mg, 1.0 mmol) and (isopropoxy)pinacolborane (1.02 mL, 5.0 mmol, 5.0 equiv) in THF (5 mL) was added quickly to the LDMAN solution, and the mixture was stirred at –55 °C for 1 h. The reaction was quenched by the addition of sat. aq. NH<sub>4</sub>Cl (1 mL). The green color disappeared upon quenching, and the resulting colorless solution was warmed to 25 °C and stirred for an

additional 10 min. The mixture was further diluted with aq. 1 N HCl (10 mL), transferred to a separatory funnel, and extracted with Et<sub>2</sub>O (3 x 30 mL). The combined organic extracts were washed with brine (50 mL), dried over magnesium sulfate, filtered, and concentrated (30 °C, 50 mmHg) to afford crude **13aa**. The product was purified by column chromatography (silica gel, 3 x 25 cm, dry load on Celite, 25-mL fractions, hexanes/EtOAc gradient elution: 97.5:2.5 (600 mL) to 95:5 (600 mL)) to afford 316.0 mg (68%) of white solid **13aa** as a mixture of diastereomers (64:36 *anti:syn*). The two diastereomers could be separated by careful column chromatography (hexanes/CH<sub>2</sub>Cl<sub>2</sub>).

Data for (1*R*,2*S*)-**syn-13aa**:

<sup>1</sup>H NMR: (500 MHz, CDCl<sub>3</sub>)

7.28 – 7.17 (m, 6H, HC(7) and HC(6) and HC(15)), 7.16 – 7.08 (m, 2H, HC(8) and HC(16)), 7.04 – 6.99 (m, 2H, HC(14)), 2.69 (td, *J* = 12.8, 4.6 Hz, 1H, HC(4)), 2.50 (d, *J* = 12.4 Hz, 1H, HC(1)), 2.38 (td, *J* = 13.3, 12.6, 5.6 Hz, 1H, HC(4)), 1.76 – 1.68 (m, 1H, HC(2)), 1.67 – 1.57 (m, 1H, HC(3)), 1.48 (d, *J* = 11.7 Hz, 1H, HC(3)), 1.34 (s, 12H, HC(12)), 1.20 (d, *J* = 7.2 Hz, 12H, HC(10)).

<sup>13</sup>C NMR: (126 MHz, CDCl<sub>3</sub>)

143.4 (C(13)), 142.6 (C(5)), 129.0 (C(6)), 128.4 (C(14)), 128.3 (C(7)), 128.2 (C(15)), 125.5 (C(16)), 125.2 (C(8)), 83.34 (C(9)), 83.27 (C(11)), 34.6 (C(4)), 32.6 (C(1)), 31.4 (C(3)), 25.3 (C(10)), 25.1 (C(10)), 25.0 (C(12)), 24.7 (C(2)), 24.4 (C(12)).

HRMS: calcd for C<sub>28</sub>H<sub>41</sub>B<sub>2</sub>O<sub>4</sub> ([M+H]<sup>+</sup>): 463.3191, found: 463.3206

TLC: *R<sub>f</sub>* 0.63 (CH<sub>2</sub>Cl<sub>2</sub>, CAM)

Data for (1*S*,2*S*)-**anti-13aa**:

<sup>1</sup>H NMR: (500 MHz, CDCl<sub>3</sub>)

7.32 – 7.26 (m, 4H, HC(15) and HC(6)), 7.21 (td, *J* = 7.3, 2.2 Hz, 5H, HC(7) and HC(14) and HC(16)), 7.13 – 7.08 (m, 1H, HC(8)), 2.75 – 2.60 (m, 2H, HC(4)), 2.50 – 2.41 (m, 1H, HC(1)), 1.88 – 1.77 (m, 3H, HC(2) and HC(3)), 1.19 (s, 6H, HC(10)), 1.16 (s, 6H, HC(10)), 1.04 (s, 6H, HC(12)), 1.00 (s, 6H, HC(12))

<sup>13</sup>C NMR: (126 MHz, CDCl<sub>3</sub>)

143.2 (C(13)), 142.9 (C(5)), 129.2 (C(6)), 128.5 (C(14)), 128.3 (C(15)), 128.0

(C(7)), 125.6 (C(16)), 125.2 (C(8)), 83.3 (C(9)), 82.9 (C(11)), 36.2 (C(4)), 34.7 (C(1)), 34.4 (C(3)), 27.3 (C(2)), 24.9 (C(12)), 24.8 (C(10)), 24.72 (C(12)), 24.68 (C(10)).

**HRMS:** calcd for  $C_{28}H_{41}B_2O_4$  ( $[M+H]^+$ ): 463.3191, found: 463.3195

**TLC:**  $R_f$  0.44 ( $CH_2Cl_2$ , CAM)

Pure *syn*-**13aa** and *anti*-**13aa** were oxidized to diols *syn*-**24** and *anti*-**24** using *GP3* for determination of enantiomeric composition.

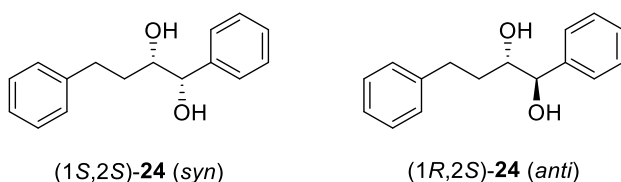

**Data for (1*S*,2*S*)-*syn*-**24**.**<sup>49</sup>

**<sup>1</sup>H NMR:** (500 MHz,  $CDCl_3$ )

7.40 – 7.30 (m, 5H), 7.28 (t,  $J = 7.4$  Hz, 2H), 7.20 (t,  $J = 7.3$  Hz, 1H), 7.14 (d,  $J = 7.2$  Hz, 2H), 4.47 (d,  $J = 6.9$  Hz, 1H), 3.74 (ddd,  $J = 9.2, 7.0, 3.4$  Hz, 1H), 2.95 (s, 1H), 2.85 (ddd,  $J = 14.7, 10.0, 5.3$  Hz, 1H), 2.77 (s, 1H), 2.62 (ddd,  $J = 13.9, 9.7, 6.9$  Hz, 1H), 1.74 (ddt,  $J = 13.5, 9.0, 4.7$  Hz, 1H), 1.66 (dddd,  $J = 13.8, 10.1, 7.1, 3.7$  Hz, 1H).

**<sup>13</sup>C NMR:** (126 MHz,  $CDCl_3$ )

141.9, 141.1, 128.7, 128.50, 128.46, 128.3, 127.0, 125.9, 78.1, 75.4, 34.4, 32.0.

**HPLC:** (1*R*,2*S*)-**24**,  $t_R$  17.9 min (84%); (1*S*,2*R*)-**24**,  $t_R$  19.4 min (16%) (Supelco Astec, hexanes/*i*-PrOH, 80:20, 0.5 mL/min, 220 nm, 24 °C)

**Data for (1*R*,2*S*)-*anti*-**24**:**

**<sup>1</sup>H NMR:** (500 MHz,  $CDCl_3$ )

7.41 – 7.31 (m, 2H), 7.31 – 7.26 (m, 1H), 7.24 – 7.15 (m, 2H), 4.71 – 4.63 (m, 1H), 3.91 – 3.81 (m, 1H), 2.85 (ddd,  $J = 14.4, 9.9, 5.2$  Hz, 1H), 2.76 – 2.58 (m, 1H), 2.26 – 2.09 (m, 1H), 1.79 (ddd,  $J = 12.7, 10.4, 4.9$  Hz, 1H), 1.64 (dtd,  $J = 14.6, 9.6, 5.2$  Hz, 1H).

**<sup>13</sup>C NMR:** (126 MHz,  $CDCl_3$ )

142.0, 140.4, 128.6, 128.51, 128.47, 128.0, 126.9, 125.9, 77.2, 74.6, 33.4, 32.2.

**HPLC:** (1*S*,2*S*)-**24**,  $t_R$  18.1 min (86%); (1*R*,2*R*)-**24**,  $t_R$  20.0 min (14%) (Supelco Astec, hexanes/*i*-PrOH, 80:20, 0.5 mL/min, 220 nm, 24 °C)

**Preparation of (1*S*,2*S*)-1,4-Diphenyl-2-(phenylsulfinyl)butan-1-ol ((1*S*,2*S*)-**14aa**)**

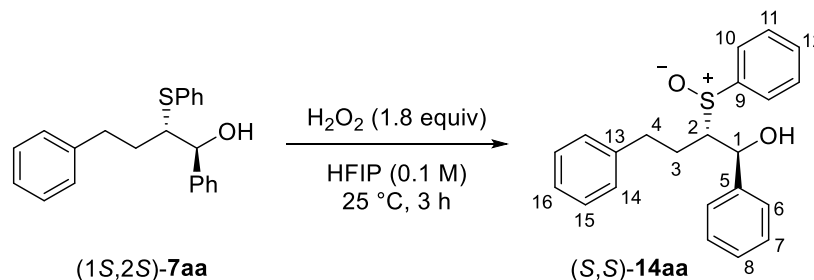

A 100-mL, round-bottomed flask equipped with a stir bar was charged with (1*S*,2*S*)-**7aa** (334.5 mg, 1.0 mmol) and hexafluoroisopropyl alcohol (7.0 mL). A colorless solution resulted. Hydrogen peroxide (aq. 30% w/w, 200  $\mu$ L, 1.8 equiv) was added in one portion, and the mixture was stirred at 25 °C for 3 h. Conversion was assessed by TLC (hexanes/EtOAc, 50:50, CAM). Upon completion, the reaction was quenched by the addition of sat. aq. Na<sub>2</sub>S<sub>2</sub>O<sub>3</sub> solution (10 mL) and the mixture was stirred at 25 °C for 15 min. Volatile components were removed under reduced pressure (30 °C, 50 mmHg), and the residue was diluted with CH<sub>2</sub>Cl<sub>2</sub> and transferred to a separatory funnel. The layers were separated, and the aqueous layer was extracted with CH<sub>2</sub>Cl<sub>2</sub> (3 x 50 mL). The combined organic extracts were washed with brine, dried over sodium sulfate, filtered, and concentrated to afford crude **14aa**. The product was purified by chromatography (silica gel, 3 x 12 cm, wet load with CH<sub>2</sub>Cl<sub>2</sub>, 25-mL fractions, hexanes/EtOAc, 65:35 (500 mL) to 50:50 (500 mL)) to afford 333.0 mg (95%) of white, solid sulfoxide **14aa** as a mixture of diastereomers. Precipitation from hexanes/Et<sub>2</sub>O afforded 325.2 mg (93%) of analytically pure **14aa** as a mixture of sulfoxide diastereomers (73:27 d.r.).

**Data for (1*S*,2*S*)-**14aa**:**

**<sup>1</sup>H NMR:** (500 MHz, CDCl<sub>3</sub>)

**Major:** 7.79 – 7.71 (m, 2H, HC(10)), 7.59 – 7.50 (m, 3H, HC(11) and HC(12)), 7.46 – 7.33 (m, 5H, HC(6) and HC(7) and HC(8)), 7.17 – 7.08 (m, 3H, HC(15) and HC(16)), 6.71 – 6.61 (m, 2H, HC(14)), 5.10 (d,  $J$  = 9.1 Hz, 1H, HC(1)), 5.07 (s, 1H, OH), 3.15 (ddd,  $J$  = 9.7, 6.0, 4.3 Hz, 1H, HC(2)), 1.99 (dtd,  $J$  = 23.7, 13.7, 6.0 Hz, 2H, HC(4)), 1.67 (dddd,  $J$  = 14.6, 10.5, 6.4, 4.1 Hz, 1H, HC(3)), 1.47 (ddt,  $J$  =

15.7, 10.0, 5.9 Hz, 1H, HC(3)). **Minor:** 7.60 – 7.55 (m, 2H, HC(10)), 7.55 – 7.51 (m, 3H, HC(11) and HC(12)), 7.39 – 7.30 (m, 5H, HC(6) and HC(7) and HC(8)), 7.14 – 7.08 (m, 3H, HC(15) and HC(16)), 6.69 – 6.61 (m, 2H, HC(14)), 4.99 (d,  $J$  = 8.0 Hz, 1H, HC(1)), 4.53 (s, 1H, OH), 2.94 – 2.84 (m, 2H, HC(2)), 2.08 (ddd,  $J$  = 14.9, 9.1, 6.3 Hz, 4H, HC(4)), 2.00 (dt,  $J$  = 13.9, 7.9 Hz, 4H, HC(4)), 1.77 (ddt,  $J$  = 12.1, 9.3, 6.3 Hz, 3H, HC(3)), 1.55 (ddt,  $J$  = 13.0, 8.8, 6.3 Hz, 3H, HC(3)).

$^{13}\text{C}$  NMR: (126 MHz,  $\text{CDCl}_3$ )

**Major:** 142.4 (C(9)), 140.51 (C(5)), 140.2 (C(13)), 131.9 (C(12)), 129.4 (C(11)), 128.71 (C(7)), 128.67 (C(8)), 128.4 (C(15)), 128.2 (C(14)), 127.5 (C(6)), 126.1 (C(16)), 125.8 (C(10)), 76.2 (C(1)), 69.1 (C(2)), 33.1 (C(4)), 27.2 (C(3)). **Minor:** 141.4 (C(5)), 140.45 (C(9)), 140.3 (C(13)), 131.1 (C(12)), 129.3 (C(11)), 128.8 (C(7)), 128.5 (C(8) and C(15)), 128.3 (C(14)), 127.0 (C(6)), 126.2 (C(16)), 125.1 (C(10)), 74.8 (C(1)), 67.6 (C(2)), 33.5 (C(4)), 24.6 (C(3)).

IR: (neat)

3313 (w), 3057 (w), 1602 (w), 1494 (w), 1476 (w), 1444 (w), 1301 (w), 1201 (w), 1079 (w), 1018 (m), 997 (w), 910 (w), 851 (w), 774 (w), 748 (w), 697 (m), 631 (w), 588 (w), 547 (w), 528 (w), 512 (w), 491 (w), 464 (w).

LRMS: (ESI,  $[\text{M}+\text{H}]^+$ )

207.1 (100), 351.1 (90), 373.1 (41).

HRMS: calcd for  $\text{C}_{22}\text{H}_{23}\text{O}_2\text{S}$  ( $[\text{M}+\text{H}]^+$ ): 351.1419, found: 351.1417

Analysis:  $\text{C}_{22}\text{H}_{22}\text{O}_2\text{S}$  (350.48)

Calcd: C, 75.40%; H, 6.33%

Found: C, 75.08%; H, 6.29%

TLC: **Major:**  $R_f$  0.49; **Minor:**  $R_f$  0.35 (hexanes/EtOAc, 50:50, CAM)

### Preparation of (*R*)-1,4-Diphenylbut-2-en-1-ol ((*R*)-15aa)

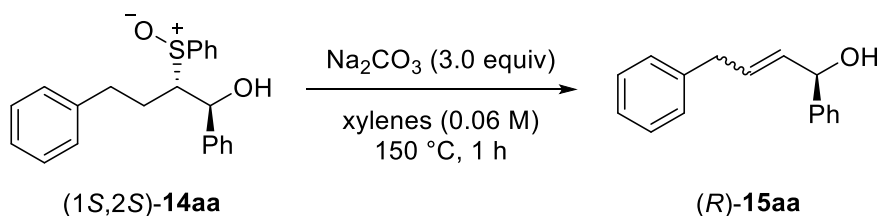

An oven-dried, 25-mL, round-bottomed flask equipped with a stir bar and reflux condenser

was charged with sulfoxide **14aa** (mixture of diastereomers, 350.0 mg, 1.0 mmol), xylenes (10.0 mL), and sodium carbonate (318.0 mg, 3.0 mmol, 3.0 equiv). The colorless suspension was heated to 150 °C. Full conversion was observed by TLC after 1 h (hexanes/EtOAc, 50:50, CAM). The mixture was cooled to room temperature and directly purified by chromatography (silica gel, 3 x 15 cm, wet load, 25-mL fractions, hexanes/EtOAc gradient elution: 95:5 (400 mL) to 90:10 (400 mL)) to afford 199.4 mg (89%) of allylic alcohol **15aa** as a clear, colorless oil (*E/Z* ratio = 8:1). Spectroscopic data matched those previously reported.<sup>50</sup>

Data for (*R*)-**15aa**:

<sup>1</sup>H NMR: (500 MHz, CDCl<sub>3</sub>)

7.47 – 7.36 (m, 4.52H, *E* and *Z*), 7.35 – 7.29 (m, 3.39H, *E* and *Z*), 7.26 – 7.18 (m, 3.39H, *E* and *Z*), 5.96 (dt, *J* = 14.0, 6.8 Hz, 1H, *E*), 5.82 – 5.76 (m, 1.26H, *E* and *Z*), 5.69 (d, *J* = 6.2 Hz, 0.13H, *Z*), 5.24 (d, *J* = 6.3 Hz, 1H, *E*), 3.65 (dd, *J* = 15.6, 6.3 Hz, 0.13H, *Z*), 3.57 (dd, *J* = 15.6, 5.9 Hz, 0.13H, *Z*), 3.44 (d, *J* = 6.8 Hz, 2H, *E*), 1.95 (s, 1.13H, *E* and *Z*).

<sup>13</sup>C NMR: (126 MHz, CDCl<sub>3</sub>)

143.6 (*Z*), 143.2 (*E*), 140.1 (*Z*), 140.0 (*E*), 133.8 (*E*), 132.9 (*Z*), 131.1 (*E*), 130.5 (*Z*), 128.8 (*Z*), 128.71 (*E*), 128.65 (*E*), 128.6 (*E*), 128.5 (*Z*), 127.8 (*Z*), 127.7 (*E*), 126.34 (*E*), 126.29 (*E*), 126.1 (*Z*), 75.1 (*E*), 70.0 (*Z*), 38.7 (*E*), 34.1 (*Z*).

IR: 3345 (w), 3061 (w), 3027 (w), 2900 (w), 1666 (w), 1602 (w), 1493 (w), 1452 (w), 1430 (w), 1231 (w), 1193 (w), 1069 (w), 1029 (w), 1004 (w), 968 (m), 914 (w), 848 (w), 742 (m), 696 (s), 637 (w), 596 (w), 537 (w), 494 (w).

HRMS: calcd for C<sub>16</sub>H<sub>16</sub>ONa ([M+Na]<sup>+</sup>): 247.1099, found: 247.1099

HPLC: (*R,E*)-**15aa**, *t*<sub>R</sub> 14.5 min (98%); (*S,E*)-**15aa**, *t*<sub>R</sub> 15.8 min (2%) (Supelco Astec, hexanes/*i*-PrOH, 80:20, 0.5 mL/min, 220 nm, 24 °C)

**Preparation of *N*-((1*S*,2*S*)-1,4-Diphenyl-2-(phenylthio)butyl)-4-methoxyaniline ((1*S*,2*S*)-(-)-**16aa**)**

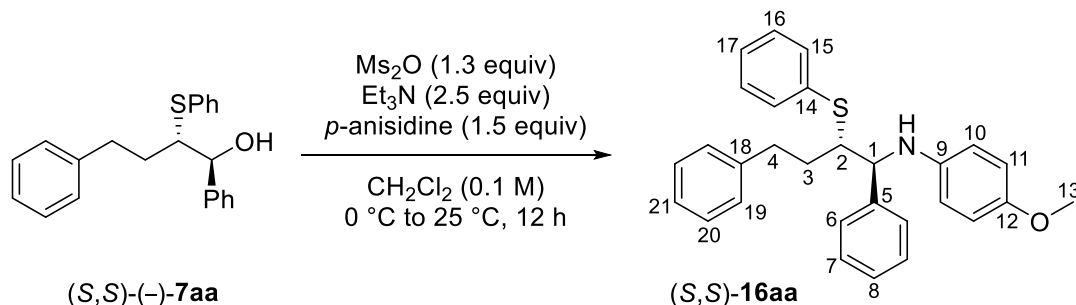

A flame-dried, 100-mL, round-bottomed flask equipped with a stir bar was charged with (1*S*,2*S*)-(-)-**7aa** (425.7 mg, 1.27 mmol) and CH<sub>2</sub>Cl<sub>2</sub> (6 mL). The resulting colorless solution was cooled to 0 °C with an ice bath. Triethylamine (442 μL, 3.18 mmol, 2.5 equiv) was added to the solution at 0 °C. An oven-dried vial was charged with methanesulfonic anhydride (287 mg, 1.65 mmol, 1.3 equiv) inside the glove box. The vial was removed from the glove box and charged with CH<sub>2</sub>Cl<sub>2</sub> (4 mL), and the resulting solution of Ms<sub>2</sub>O was added into the reaction by syringe at 0 °C. The mixture was stirred at 0 °C for 1 h. 4-Methoxyaniline (234 mg, 1.9 mmol, 1.5 equiv) was directly added into the mixture. The reaction mixture was warmed to 25 °C and stirred for 12 h at 25 °C. The reaction was then quenched by adding sat. aq. NaHCO<sub>3</sub> solution (10 mL). The mixture was transferred to a separatory funnel and extracted with CH<sub>2</sub>Cl<sub>2</sub> (3 x 25 mL). The combined organic phases were washed with brine (25 mL), dried over magnesium sulfate, filtered, and concentrated (30 °C, 50 mmHg). The residue was purified by column chromatography (silica gel, 3 x 20 cm, dry load on Celite, 25-mL fractions, hexanes/EtOAc, 95:5 (1000 mL)) to afford 526.3 mg (94%) of **16aa**. Recrystallization from hexanes/Et<sub>2</sub>O afforded 483.3 mg (87%) of analytically pure **16aa** as a white solid.

Data for (1*S*,2*S*)-(-)-**16aa**:

m.p.: 74–76 °C (ABT, 4.0 x 10<sup>-5</sup> mmHg)

<sup>1</sup>H NMR: (500 MHz, CDCl<sub>3</sub>)

7.33 (d, *J* = 7.3 Hz, 2H, HC(6)), 7.29 – 7.18 (m, 11H, HC(7), HC(8), HC(20), HC(21), HC(15), HC(16), HC(17)), 7.05 (d, *J* = 7.3 Hz, 2H, HC(19)), 6.70 (d, *J* = 8.9 Hz, 2H, HC(11)), 6.49 (d, *J* = 8.9 Hz, 2H, HC(10)), 4.70 (bs, 1H, NH), 4.31 (d, *J* = 6.4 Hz, 1H, HC(1)), 3.72 (s, 3H, H<sub>3</sub>C(13)), 3.27 (ddd, *J* = 9.0, 6.4, 4.7 Hz, 1H, HC(2)), 2.98 (ddd, *J* = 14.1, 9.1, 5.3 Hz, 1H, H<sub>2</sub>C(4)), 2.82 – 2.70 (m, 1H, H<sub>2</sub>C(4)),

2.07 – 1.95 (m, 1H, H<sub>2</sub>C(3)), 1.84 (ddt,  $J = 14.0, 9.0, 4.5$  Hz, 1H, H<sub>2</sub>C(3)).

**<sup>13</sup>C NMR:** (126 MHz, CDCl<sub>3</sub>)  
152.3 (C(12)), 141.9 (C(18) or C(9) or (C(5))), 141.5 (C(18) or C(9) or (C(5))), 141.3 (C(18) or C(9) or (C(5))), 133.7 (C(14)), 133.1 (HC(15)), 129.0 (HC(16)), 128.6 (HC(7) or HC(19) or HC(20)), 128.54 (HC(7) or HC(19) or HC(20)), 128.52 (HC(7) or HC(19) or HC(20)), 127.7 (HC(6)), 127.6 (HC(8) or HC(17)), 127.5 (HC(8) or HC(17)), 126.1 (HC(21)), 115.1 (HC(10)), 114.9 (HC(11)), 61.9 (HC(1)), 56.5 (HC(2)), 55.8 (H<sub>3</sub>C(13)), 33.7 (H<sub>2</sub>C(3)), 33.4 (H<sub>2</sub>C(4)).

**IR:** (neat)  
3333 (w), 3007 (w), 2947 (w), 1601 (w), 1508 (m), 1475 (w), 1455 (w), 1438 (w), 1406 (w), 1344 (w), 1308 (w), 1296 (w), 1272 (w), 1235 (m), 1174 (w), 1156 (w), 1118 (w), 1099 (w), 1035 (w), 1001 (w), 912 (w), 817 (w), 808 (w), 776 (w), 753 (w), 744 (w), 695 (m), 664 (w), 630 (w), 579 (w), 534 (w), 516 (w), 493 (w).

**LRMS:** (ESI, [M+H]<sup>+</sup>)  
91.0 (10), 129.1 (15), 207.1 (100), 239.1 (11), 317.1 (18), 440.2 (6).

**HRMS:** calcd for C<sub>29</sub>H<sub>30</sub>NOS ([M+H]<sup>+</sup>): 440.2048, found: 440.2052

**Analysis:** C<sub>29</sub>H<sub>29</sub>NOS (439.62)  
Calcd: C, 79.23%; H, 6.65%; N, 3.19%  
Found: C, 78.89%; H, 6.55%; N, 3.21%

**TLC:**  $R_f$  0.31 (hexanes/EtOAc, 90:10, CAM)

**HPLC:** (1*R*,2*R*)-**16aa**,  $t_R$  11.1 min (3%); (1*S*,2*S*)-**16aa**,  $t_R$  15.0 min (97%) (Supelco Astec, hexanes/*i*-PrOH, 80:20, 0.5 mL/min, 220 nm, 24 °C)

**Opt. Rot.:**  $[\alpha]_D^{24}$  -46.9 ( $c = 0.85$  in 100% EtOH) (94% ee)

## NMR Spectra and HPLC Traces

(1*S*,2*S*)-(-)-**7aa** <sup>1</sup>H NMR (500 MHz, CDCl<sub>3</sub>)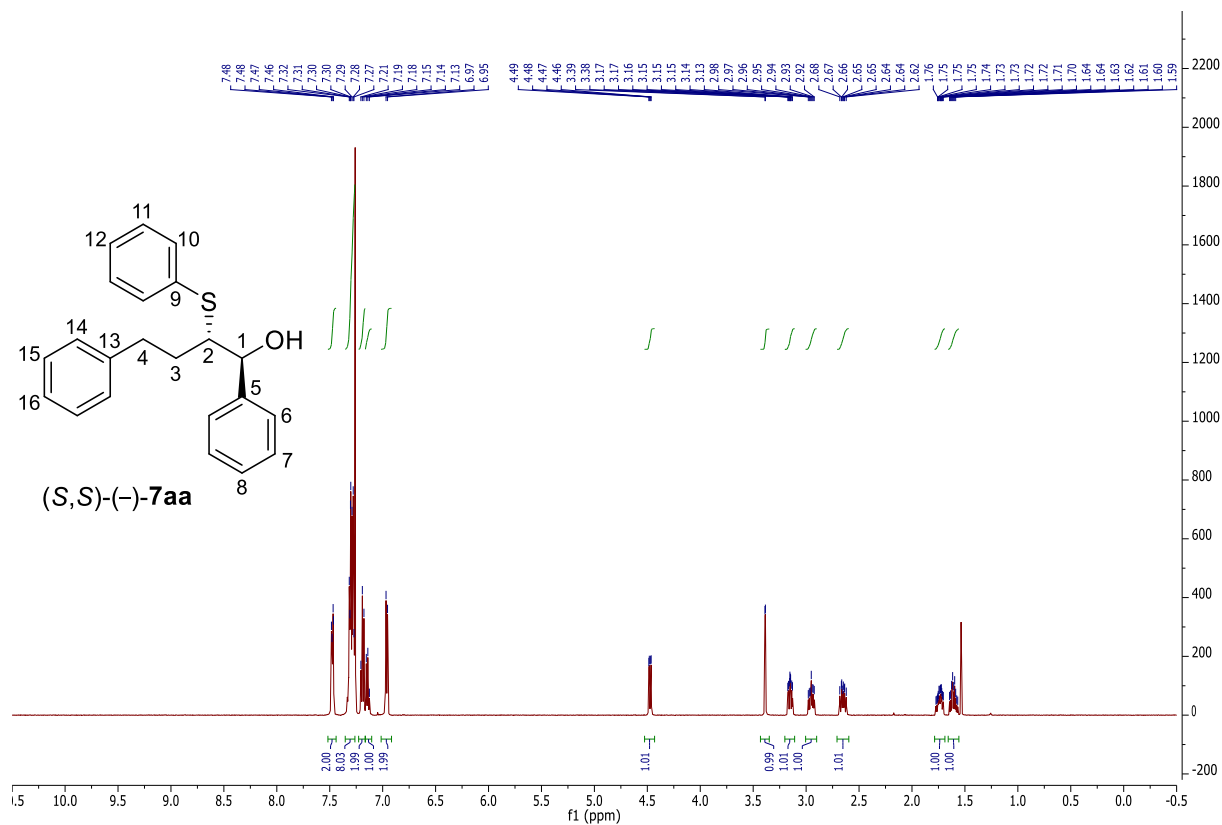(1*S*,2*S*)-(-)-**7aa** <sup>13</sup>C NMR (126 MHz, CDCl<sub>3</sub>)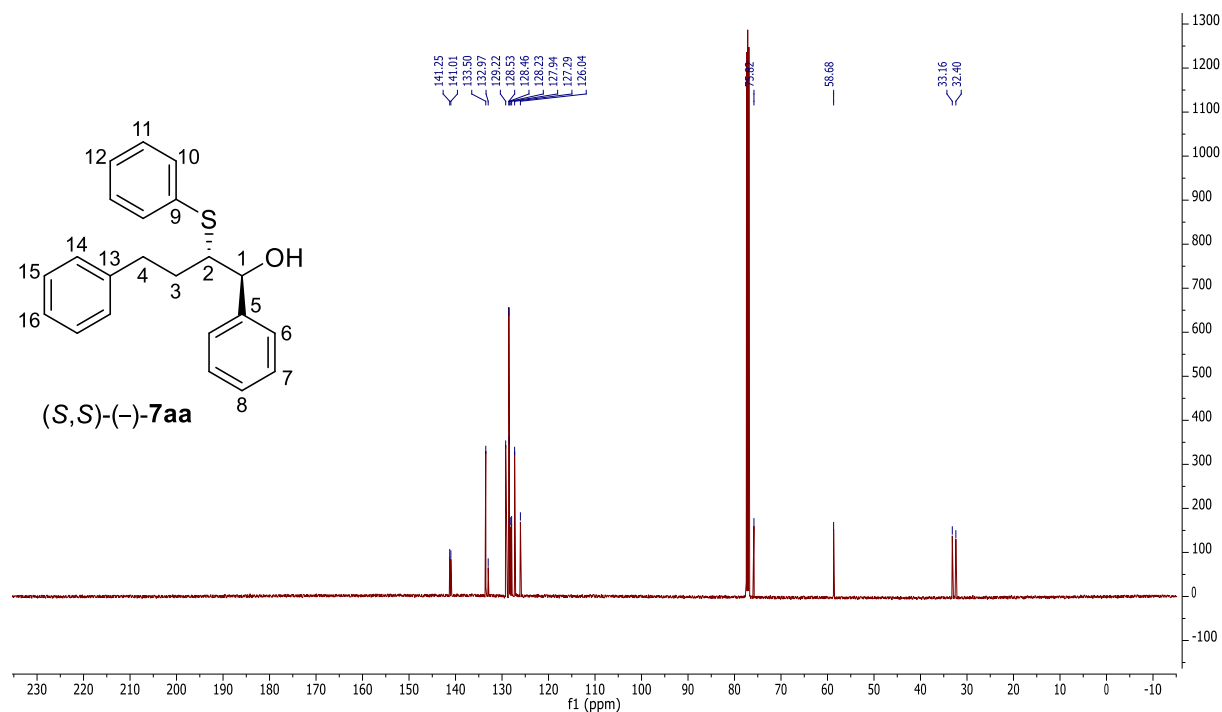

**(±)-7aa**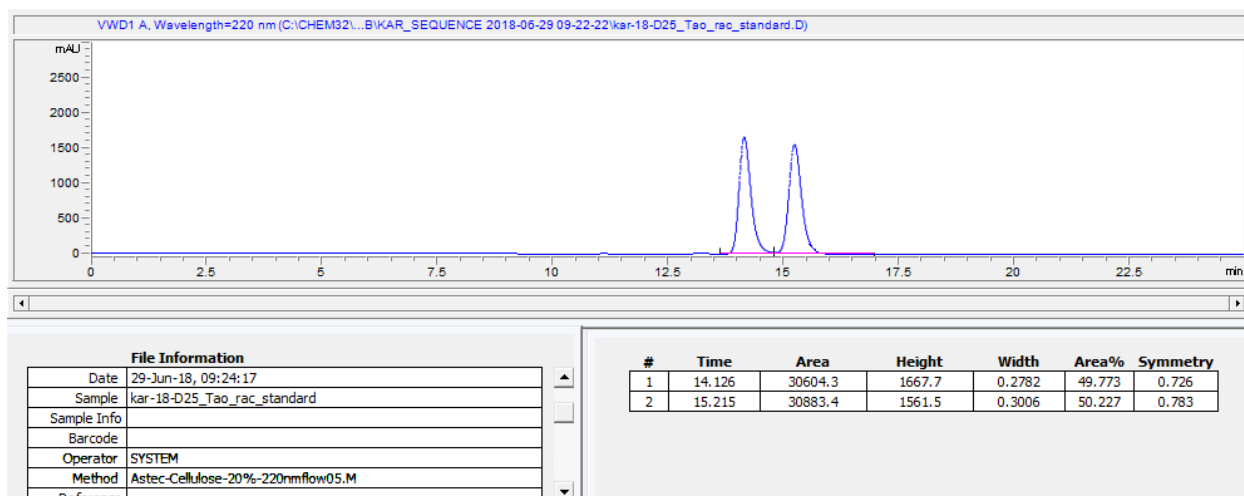**(-)-7aa**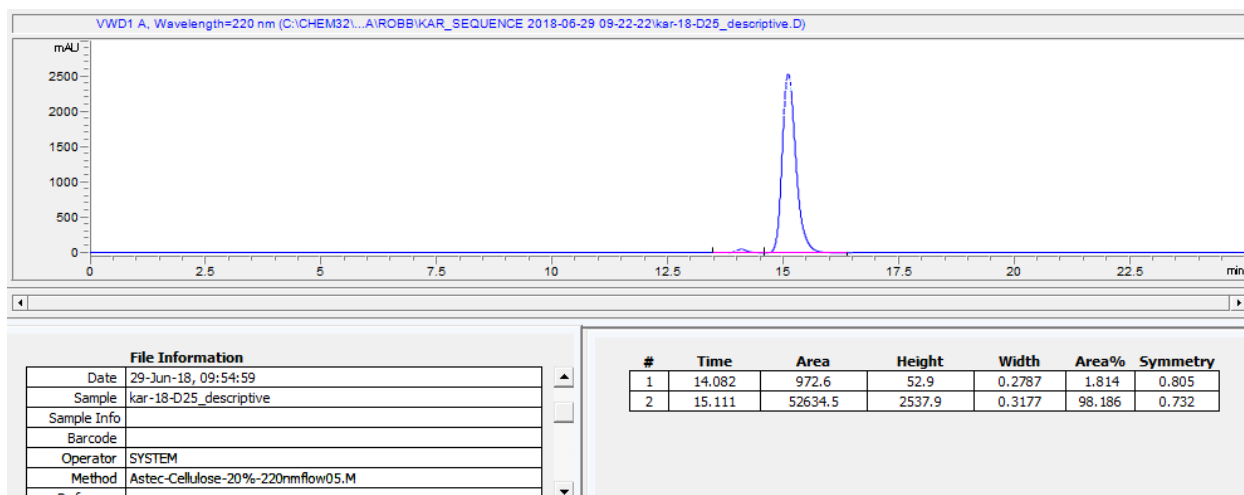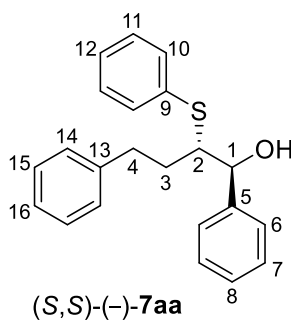

[illegible]

Chemical structure of **(S,S)-(-)-7ab** is shown, with atoms numbered 1 through 17. The structure features a central chiral center (C1) bonded to a hydroxyl group (OH), a phenyl ring (C2-C8, O9), a sulfur atom (S10), and a propyl chain (C3-C5). The propyl chain is further substituted with a phenyl ring (C11-C17).

The  $^{13}\text{C}$  NMR spectrum (f1 (ppm)) shows the following chemical shifts (ppm):

- 156.53
- 141.32
- 133.50
- 133.04
- 133.01
- 128.55
- 128.44
- 127.90
- 126.02
- 113.94
- 75.36
- 58.68
- 55.42
- 33.16
- 32.24

**(±)-7ab**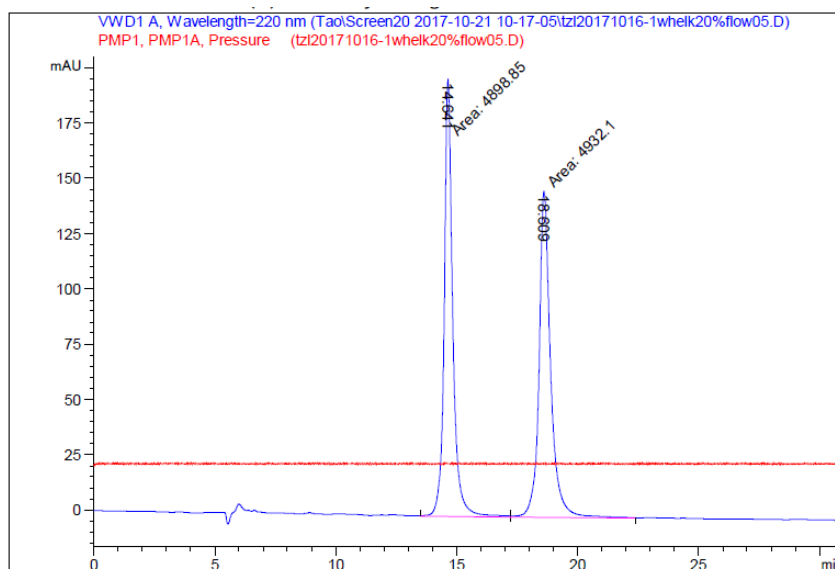

| Peak # | RetTime [min] | Type | Width [min] | Area [mAU*s] | Height [mAU] | Area %  |
|--------|---------------|------|-------------|--------------|--------------|---------|
| 1      | 14.641        | MF   | 0.4129      | 4898.85449   | 197.72151    | 49.8309 |
| 2      | 18.609        | FM   | 0.5577      | 4932.09961   | 147.40236    | 50.1691 |

**(1*S*,2*S*)-(-)-7ab**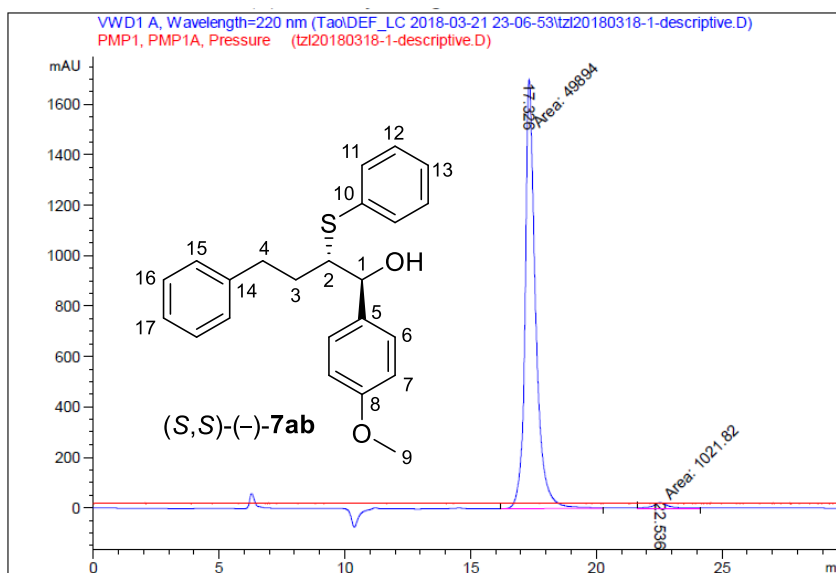

| Peak # | RetTime [min] | Type | Width [min] | Area [mAU*s] | Height [mAU] | Area %  |
|--------|---------------|------|-------------|--------------|--------------|---------|
| 1      | 17.326        | MM   | 0.4883      | 4.98940e4    | 1703.08862   | 97.9931 |
| 2      | 22.536        | MM   | 0.7623      | 1021.82159   | 22.33975     | 2.0069  |

Chemical structure of **(S,S)-(-)-7ac** is shown, with atoms numbered 1 through 16. The structure features a central chiral center (C1) bonded to a hydroxyl group (OH), a chlorine atom (Cl), and two phenyl rings (C5-C8 and C9-C12). The side chain (C13-C16) is attached to the second phenyl ring (C9-C12).

<sup>1</sup>H NMR spectrum (CDCl<sub>3</sub>) of **(S,S)-(-)-7ac**. The x-axis represents the chemical shift in ppm (f1), ranging from -0.5 to 10.0. The y-axis represents the intensity, ranging from 0 to 8000. The spectrum shows several peaks, with integration values provided below the baseline and a list of peak chemical shifts at the top.

Integration values (from left to right): 3.08, 3.04, 2.03, 1.03, 1.0, 1.04, 1.04, 1.03, 1.04, 1.04.

Peak chemical shifts (ppm): 7.47, 7.46, 7.45, 7.44, 7.43, 7.42, 7.41, 7.40, 7.39, 7.38, 7.37, 7.36, 7.35, 7.34, 7.33, 7.32, 7.31, 7.30, 7.29, 7.28, 7.27, 7.26, 7.25, 7.24, 7.23, 7.22, 7.21, 7.20, 7.19, 7.18, 7.17, 7.16, 7.15, 7.14, 7.13, 7.12, 7.11, 7.10, 7.09, 7.08, 7.07, 7.06, 7.05, 7.04, 7.03, 7.02, 7.01, 7.00, 6.99, 6.98, 6.97, 6.96, 6.95, 6.94, 6.93, 6.92, 6.91, 6.90, 6.89, 6.88, 6.87, 6.86, 6.85, 6.84, 6.83, 6.82, 6.81, 6.80, 6.79, 6.78, 6.77, 6.76, 6.75, 6.74, 6.73, 6.72, 6.71, 6.70, 6.69, 6.68, 6.67, 6.66, 6.65, 6.64, 6.63, 6.62, 6.61, 6.60, 6.59, 6.58, 6.57, 6.56, 6.55, 6.54, 6.53, 6.52, 6.51, 6.50, 6.49, 6.48, 6.47, 6.46, 6.45, 6.44, 6.43, 6.42, 6.41, 6.40, 6.39, 6.38, 6.37, 6.36, 6.35, 6.34, 6.33, 6.32, 6.31, 6.30, 6.29, 6.28, 6.27, 6.26, 6.25, 6.24, 6.23, 6.22, 6.21, 6.20, 6.19, 6.18, 6.17, 6.16, 6.15, 6.14, 6.13, 6.12, 6.11, 6.10, 6.09, 6.08, 6.07, 6.06, 6.05, 6.04, 6.03, 6.02, 6.01, 6.00, 5.99, 5.98, 5.97, 5.96, 5.95, 5.94, 5.93, 5.92, 5.91, 5.90, 5.89, 5.88, 5.87, 5.86, 5.85, 5.84, 5.83, 5.82, 5.81, 5.80, 5.79, 5.78, 5.77, 5.76, 5.75, 5.74, 5.73, 5.72, 5.71, 5.70, 5.69, 5.68, 5.67, 5.66, 5.65, 5.64, 5.63, 5.62, 5.61, 5.60, 5.59, 5.58, 5.57, 5.56, 5.55, 5.54, 5.53, 5.52, 5.51, 5.50, 5.49, 5.48, 5.47, 5.46, 5.45, 5.44, 5.43, 5.42, 5.41, 5.40, 5.39, 5.38, 5.37, 5.36, 5.35, 5.34, 5.33, 5.32, 5.31, 5.30, 5.29, 5.28, 5.27, 5.26, 5.25, 5.24, 5.23, 5.22, 5.21, 5.20, 5.19, 5.18, 5.17, 5.16, 5.15, 5.14, 5.13, 5.12, 5.11, 5.10, 5.09, 5.08, 5.07, 5.06, 5.05, 5.04, 5.03, 5.02, 5.01, 5.00, 4.99, 4.98, 4.97, 4.96, 4.95, 4.94, 4.93, 4.92, 4.91, 4.90, 4.89, 4.88, 4.87, 4.86, 4.85, 4.84, 4.83, 4.82, 4.81, 4.80, 4.79, 4.78, 4.77, 4.76, 4.75, 4.74, 4.73, 4.72, 4.71, 4.70, 4.69, 4.68, 4.67, 4.66, 4.65, 4.64, 4.63, 4.62, 4.61, 4.60, 4.59, 4.58, 4.57, 4.56, 4.55, 4.54, 4.53, 4.52, 4.51, 4.50, 4.49, 4.48, 4.47, 4.46, 4.45, 4.44, 4.43, 4.42, 4.41, 4.40, 4.39, 4.38, 4.37, 4.36, 4.35, 4.34, 4.33, 4.32, 4.31, 4.30, 4.29, 4.28, 4.27, 4.26, 4.25, 4.24, 4.23, 4.22, 4.21, 4.20, 4.19, 4.18, 4.17, 4.16, 4.15, 4.14, 4.13, 4.12, 4.11, 4.10, 4.09, 4.08, 4.07, 4.06, 4.05, 4.04, 4.03, 4.02, 4.01, 4.00, 3.99, 3.98, 3.97, 3.96, 3.95, 3.94, 3.93, 3.92, 3.91, 3.90, 3.89, 3.88, 3.87, 3.86, 3.85, 3.84, 3.83, 3.82, 3.81, 3.80, 3.79, 3.78, 3.77, 3.76, 3.75, 3.74, 3.73, 3.72, 3.71, 3.70, 3.69, 3.68, 3.67, 3.66, 3.65, 3.64, 3.63, 3.62, 3.61, 3.60, 3.59, 3.58, 3.57, 3.56, 3.55, 3.54, 3.53, 3.52, 3.51, 3.50, 3.49, 3.48, 3.47, 3.46, 3.45, 3.44, 3.43, 3.42, 3.41, 3.40, 3.39, 3.38, 3.37, 3.36, 3.35, 3.34, 3.33, 3.32, 3.31, 3.30, 3.29, 3.28, 3.27, 3.26, 3.25, 3.24, 3.23, 3.22, 3.21, 3.20, 3.19, 3.18, 3.17, 3.16, 3.15, 3.14, 3.13, 3.12, 3.11, 3.10, 3.09, 3.08, 3.07, 3.06, 3.05, 3.04, 3.03, 3.02, 3.01, 3.00, 2.99, 2.98, 2.97, 2.96, 2.95, 2.94, 2.93, 2.92, 2.91, 2.90, 2.89, 2.88, 2.87, 2.86, 2.85, 2.84, 2.83, 2.82, 2.81, 2.80, 2.79, 2.78, 2.77, 2.76, 2.75, 2.74, 2.73, 2.72, 2.71, 2.70, 2.69, 2.68, 2.67, 2.66, 2.65, 2.64, 2.63, 2.62, 2.61, 2.60, 2.59, 2.58, 2.57, 2.56, 2.55, 2.54, 2.53, 2.52, 2.51, 2.50, 2.49, 2.48, 2.47, 2.46, 2.45, 2.44, 2.43, 2.42, 2.41, 2.40, 2.39, 2.38, 2.37, 2.36, 2.35, 2.34, 2.33, 2.32, 2.31, 2.30, 2.29, 2.28, 2.27, 2.26, 2.25, 2.24, 2.23, 2.22, 2.21, 2.20, 2.19, 2.18, 2.17, 2.16, 2.15, 2.14, 2.13, 2.12, 2.11, 2.10, 2.09, 2.08, 2.07, 2.06, 2.05, 2.04, 2.03, 2.02, 2.01, 2.00, 1.99, 1.98, 1.97, 1.96, 1.95, 1.94, 1.93, 1.92, 1.91, 1.90, 1.89, 1.88, 1.87, 1.86, 1.85, 1.84, 1.83, 1.82, 1.81, 1.80, 1.79, 1.78, 1.77, 1.76, 1.75, 1.74, 1.73, 1.72, 1.71, 1.70, 1.69, 1.68, 1.67, 1.66, 1.65, 1.64, 1.63, 1.62, 1.61, 1.60, 1.59, 1.58, 1.57, 1.56, 1.55, 1.54, 1.53, 1.52, 1.51, 1.50, 1.49, 1.48, 1.47, 1.46, 1.45, 1.44, 1.43, 1.42, 1.41, 1.40, 1.39, 1.38, 1.37, 1.36, 1.35, 1.34, 1.33, 1.32, 1.31, 1.30, 1.29, 1.28,

Chemical structure of **(S,S)-(-)-7ac** is shown, with carbons numbered 1 through 16. The structure features a central chiral center (C1) bonded to a hydroxyl group (OH), a chlorine atom (Cl), and two phenyl rings. One phenyl ring is substituted with a sulfur atom (S) and a methyl group (CH<sub>3</sub>). The other phenyl ring is substituted with a methyl group (CH<sub>3</sub>). The carbons are numbered as follows: 1 (chiral center), 2 (C-Cl), 3 (C-OH), 4 (C-S), 5 (C-CH<sub>3</sub>), 6 (C-CH<sub>3</sub>), 7 (C-CH<sub>3</sub>), 8 (C-CH<sub>3</sub>), 9 (C-CH<sub>3</sub>), 10 (C-CH<sub>3</sub>), 11 (C-CH<sub>3</sub>), 12 (C-CH<sub>3</sub>), 13 (C-CH<sub>3</sub>), 14 (C-CH<sub>3</sub>), 15 (C-CH<sub>3</sub>), and 16 (C-CH<sub>3</sub>).

The <sup>13</sup>C NMR spectrum (f1 (ppm)) shows the following peaks (ppm):

- 144.05
- 138.55
- 133.87
- 133.58
- 129.27
- 128.63
- 128.52
- 128.12
- 75.03
- 58.47
- 33.16
- 32.23

**(±)-7ac**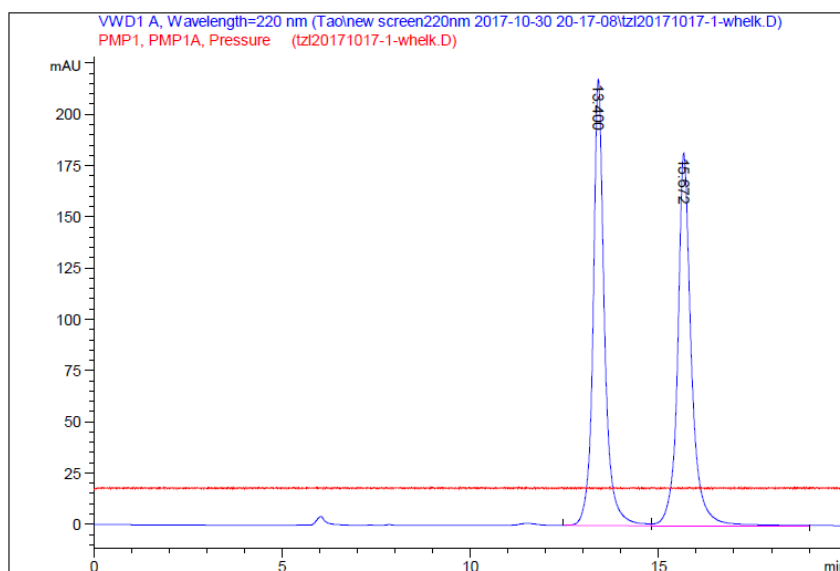

| Peak # | RetTime [min] | Type | Width [min] | Area [mAU*s] | Height [mAU] | Area %  |
|--------|---------------|------|-------------|--------------|--------------|---------|
| 1      | 13.400        | BV   | 0.3091      | 4565.85938   | 217.39482    | 49.6680 |
| 2      | 15.672        | VV   | 0.3733      | 4626.90088   | 181.41846    | 50.3320 |

**(1*S*,2*S*)-(-)-7ac**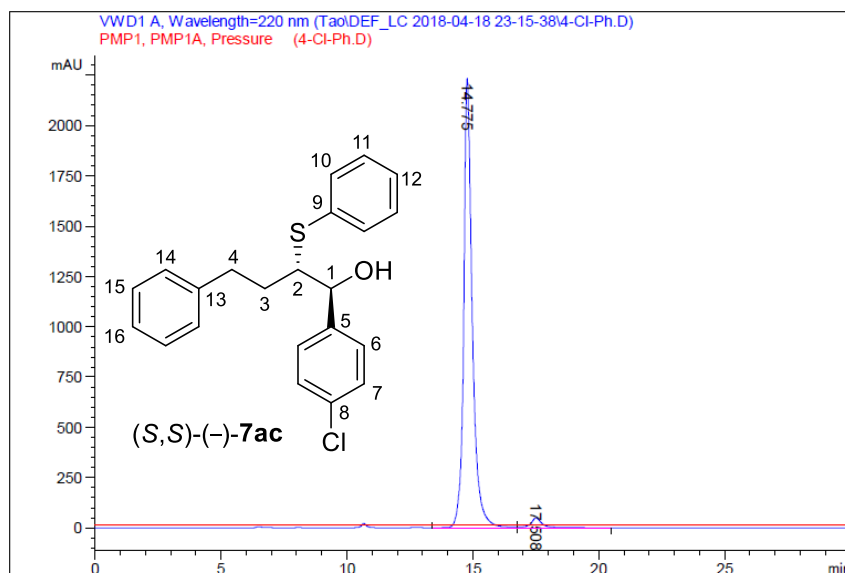

| Peak # | RetTime [min] | Type | Width [min] | Area [mAU*s] | Height [mAU] | Area %  |
|--------|---------------|------|-------------|--------------|--------------|---------|
| 1      | 14.775        | VV   | 0.3477      | 5.30883e4    | 2229.31250   | 97.0803 |
| 2      | 17.508        | VB   | 0.4609      | 1596.62048   | 49.10498     | 2.9197  |

Chemical structure of **(S,S)-(-)-7ad** is shown, featuring a central chiral center (C1) bonded to a hydroxyl group (OH), a trifluoromethyl group (CF<sub>3</sub>), and a side chain containing a chiral center (C2) and a phenyl ring (11-13). The side chain also includes a phenyl ring (15-17) and a trifluoromethyl group (9).

The <sup>1</sup>H NMR spectrum (CDCl<sub>3</sub>) shows the following peaks and integrations:

- Aromatic protons (11-13, 15-17): 7.0-7.5 ppm, integration 1.97, 1.96, 2.94, 1.98, 1.97.
- CH-OH (1): 4.5 ppm, integration 1.00.
- CH<sub>2</sub> (2,3): 3.3 ppm, integration 0.99.
- CH<sub>2</sub> (4): 1.8 ppm, integration 1.00.
- CH<sub>3</sub> (16): 1.5 ppm, integration 1.01.
- CF<sub>3</sub> (9): 2.8 ppm, integration 0.99.

**(S,S)-(-)-7ad**

CC1=CC=C(C=C1)C[C@H](O)[C@@H](S2=CC=CC=C2)C3=CC=C(C=C3)C(F)(F)F

<sup>13</sup>C NMR spectrum (ppm):

- 145.18
- 140.93
- 138.56
- 136.65
- 135.20
- 133.59
- 132.50
- 130.65
- 129.87
- 129.13
- 128.87
- 128.52
- 128.56
- 127.53
- 127.44
- 125.39
- 125.30
- 125.28
- 125.24
- 125.06
- 75.04
- 58.33
- 33.17
- 32.30

(1*S*,2*S*)-(-)-**7ad**  $^{19}\text{F}$  NMR (471 MHz,  $\text{CDCl}_3$ )

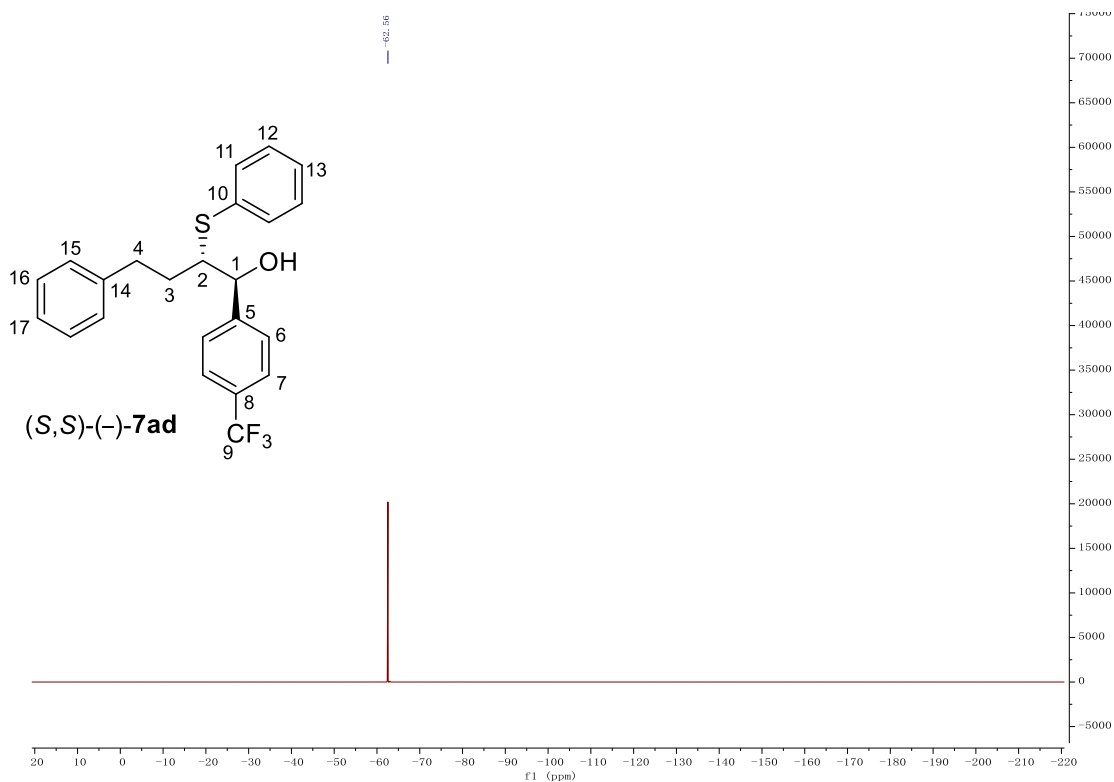

**(±)-7ad**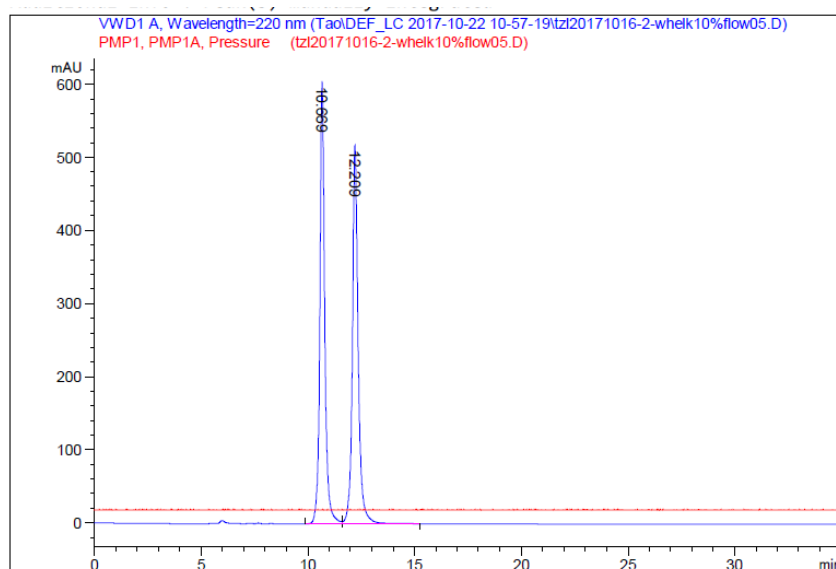**(1*S*,2*S*)-(-)-7ad**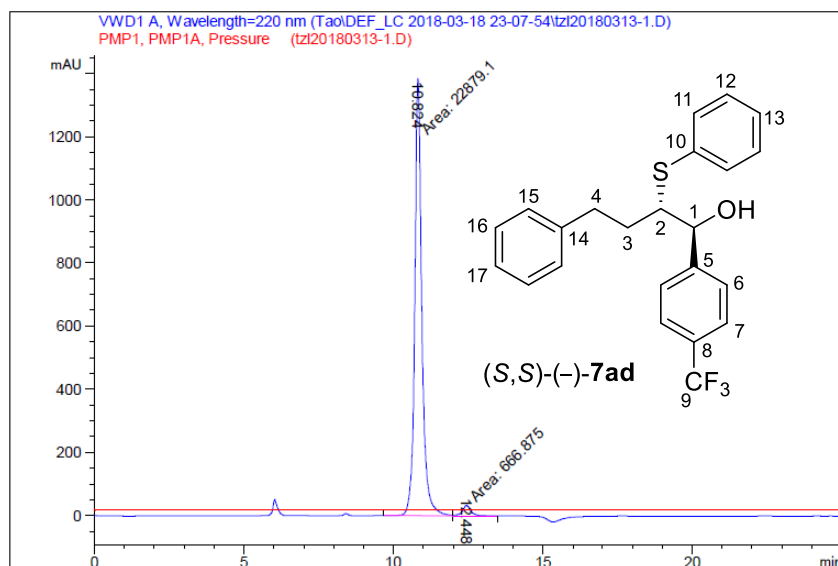

(1*S*,2*S*)-(-)-**7ae**  $^1\text{H}$  NMR (500 MHz,  $\text{CDCl}_3$ )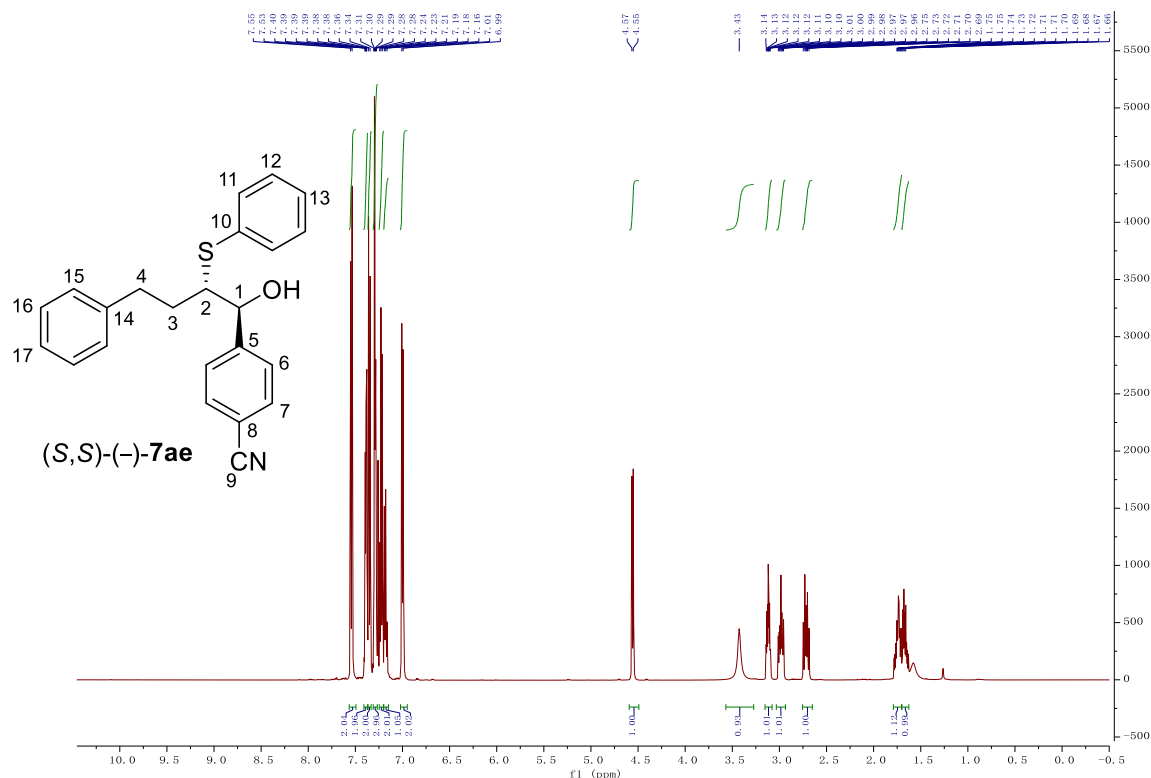(1*S*,2*S*)-(-)-**7ae**  $^{13}\text{C}$  NMR (126 MHz,  $\text{CDCl}_3$ )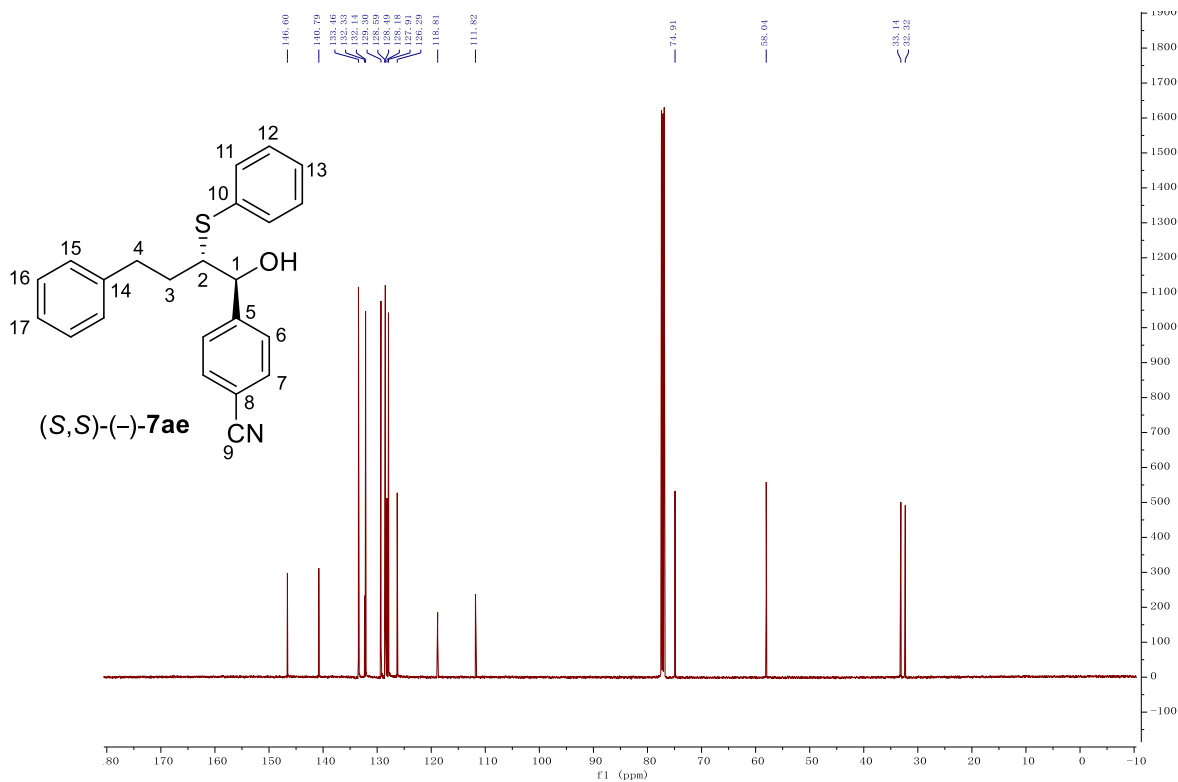

**(±)-7ae**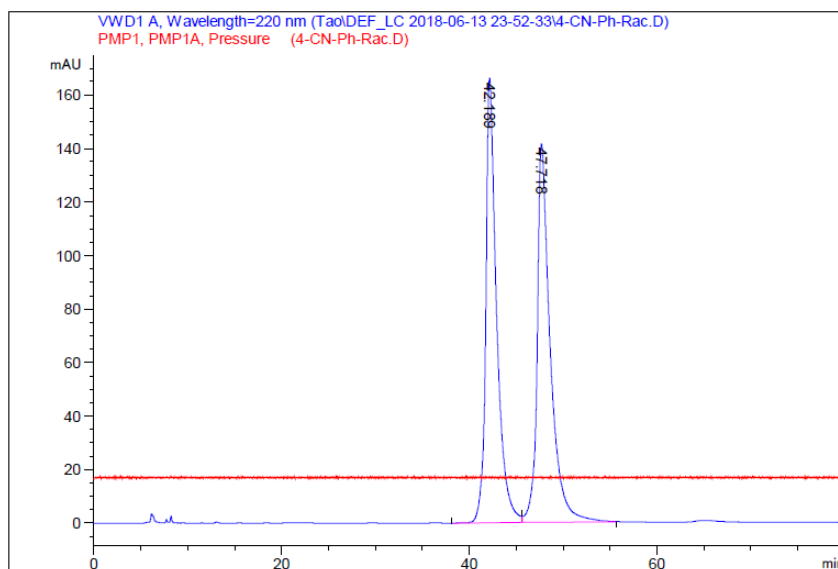

| Peak # | RetTime [min] | Type | Width [min] | Area [mAU*s] | Height [mAU] | Area %  |
|--------|---------------|------|-------------|--------------|--------------|---------|
| 1      | 42.189        | BV   | 1.1513      | 1.33301e4    | 166.19270    | 49.3018 |
| 2      | 47.718        | VB   | 1.3683      | 1.37076e4    | 141.58827    | 50.6982 |

**(1S,2S)-(-)-7ae**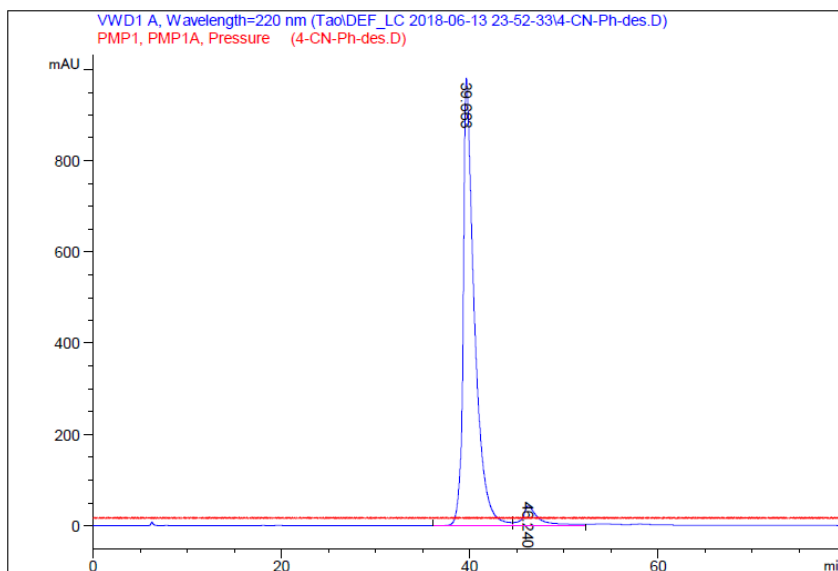

| Peak # | RetTime [min] | Type | Width [min] | Area [mAU*s] | Height [mAU] | Area %  |
|--------|---------------|------|-------------|--------------|--------------|---------|
| 1      | 39.663        | VV   | 1.1734      | 8.15544e4    | 981.33118    | 93.9833 |
| 2      | 46.240        | VB   | 1.6542      | 5221.04688   | 43.39202     | 6.0167  |

Chemical structure of (S,S)-(-)-7af is shown, with protons labeled 1 through 18. The <sup>1</sup>H NMR spectrum (CDCl<sub>3</sub>) displays peaks from 0 to 10 ppm. Integration values are provided below the baseline, and a list of chemical shifts (δ) is shown at the top.

Chemical shifts (ppm): 7.49, 7.48, 7.47, 7.45, 7.44, 7.43, 7.42, 7.41, 7.40, 7.39, 7.38, 7.37, 7.36, 7.35, 7.34, 7.33, 7.32, 7.31, 7.30, 7.29, 7.28, 7.27, 7.26, 7.25, 7.24, 7.23, 7.22, 7.21, 7.20, 7.19, 7.18, 7.17, 7.16, 7.15, 7.14, 7.13, 7.12, 7.11, 7.10, 7.09, 7.08, 7.07, 7.06, 7.05, 7.04, 7.03, 7.02, 7.01, 7.00, 6.99, 6.98, 6.97, 6.96, 6.95, 6.94, 6.93, 6.92, 6.91, 6.90, 6.89, 6.88, 6.87, 6.86, 6.85, 6.84, 6.83, 6.82, 6.81, 6.80, 6.79, 6.78, 6.77, 6.76, 6.75, 6.74, 6.73, 6.72, 6.71, 6.70, 6.69, 6.68, 6.67, 6.66, 6.65, 6.64, 6.63, 6.62, 6.61, 6.60, 6.59, 6.58, 6.57, 6.56, 6.55, 6.54, 6.53, 6.52, 6.51, 6.50, 6.49, 6.48, 6.47, 6.46, 6.45, 6.44, 6.43, 6.42, 6.41, 6.40, 6.39, 6.38, 6.37, 6.36, 6.35, 6.34, 6.33, 6.32, 6.31, 6.30, 6.29, 6.28, 6.27, 6.26, 6.25, 6.24, 6.23, 6.22, 6.21, 6.20, 6.19, 6.18, 6.17, 6.16, 6.15, 6.14, 6.13, 6.12, 6.11, 6.10, 6.09, 6.08, 6.07, 6.06, 6.05, 6.04, 6.03, 6.02, 6.01, 6.00, 5.99, 5.98, 5.97, 5.96, 5.95, 5.94, 5.93, 5.92, 5.91, 5.90, 5.89, 5.88, 5.87, 5.86, 5.85, 5.84, 5.83, 5.82, 5.81, 5.80, 5.79, 5.78, 5.77, 5.76, 5.75, 5.74, 5.73, 5.72, 5.71, 5.70, 5.69, 5.68, 5.67, 5.66, 5.65, 5.64, 5.63, 5.62, 5.61, 5.60, 5.59, 5.58, 5.57, 5.56, 5.55, 5.54, 5.53, 5.52, 5.51, 5.50, 5.49, 5.48, 5.47, 5.46, 5.45, 5.44, 5.43, 5.42, 5.41, 5.40, 5.39, 5.38, 5.37, 5.36, 5.35, 5.34, 5.33, 5.32, 5.31, 5.30, 5.29, 5.28, 5.27, 5.26, 5.25, 5.24, 5.23, 5.22, 5.21, 5.20, 5.19, 5.18, 5.17, 5.16, 5.15, 5.14, 5.13, 5.12, 5.11, 5.10, 5.09, 5.08, 5.07, 5.06, 5.05, 5.04, 5.03, 5.02, 5.01, 5.00, 4.99, 4.98, 4.97, 4.96, 4.95, 4.94, 4.93, 4.92, 4.91, 4.90, 4.89, 4.88, 4.87, 4.86, 4.85, 4.84, 4.83, 4.82, 4.81, 4.80, 4.79, 4.78, 4.77, 4.76, 4.75, 4.74, 4.73, 4.72, 4.71, 4.70, 4.69, 4.68, 4.67, 4.66, 4.65, 4.64, 4.63, 4.62, 4.61, 4.60, 4.59, 4.58, 4.57, 4.56, 4.55, 4.54, 4.53, 4.52, 4.51, 4.50, 4.49, 4.48, 4.47, 4.46, 4.45, 4.44, 4.43, 4.42, 4.41, 4.40, 4.39, 4.38, 4.37, 4.36, 4.35, 4.34, 4.33, 4.32, 4.31, 4.30, 4.29, 4.28, 4.27, 4.26, 4.25, 4.24, 4.23, 4.22, 4.21, 4.20, 4.19, 4.18, 4.17, 4.16, 4.15, 4.14, 4.13, 4.12, 4.11, 4.10, 4.09, 4.08, 4.07, 4.06, 4.05, 4.04, 4.03, 4.02, 4.01, 4.00, 3.99, 3.98, 3.97, 3.96, 3.95, 3.94, 3.93, 3.92, 3.91, 3.90, 3.89, 3.88, 3.87, 3.86, 3.85, 3.84, 3.83, 3.82, 3.81, 3.80, 3.79, 3.78, 3.77, 3.76, 3.75, 3.74, 3.73, 3.72, 3.71, 3.70, 3.69, 3.68, 3.67, 3.66, 3.65, 3.64, 3.63, 3.62, 3.61, 3.60, 3.59, 3.58, 3.57, 3.56, 3.55, 3.54, 3.53, 3.52, 3.51, 3.50, 3.49, 3.48, 3.47, 3.46, 3.45, 3.44, 3.43, 3.42, 3.41, 3.40, 3.39, 3.38, 3.37, 3.36, 3.35, 3.34, 3.33, 3.32, 3.31, 3.30, 3.29, 3.28, 3.27, 3.26, 3.25, 3.24, 3.23, 3.22, 3.21, 3.20, 3.19, 3.18, 3.17, 3.16, 3.15, 3.14, 3.13, 3.12, 3.11, 3.10, 3.09, 3.08, 3.07, 3.06, 3.05, 3.04, 3.03, 3.02, 3.01, 3.00, 2.99, 2.98, 2.97, 2.96, 2.95, 2.94, 2.93, 2.92, 2.91, 2.90, 2.89, 2.88, 2.87, 2.86, 2.85, 2.84, 2.83, 2.82, 2.81, 2.80, 2.79, 2.78, 2.77, 2.76, 2.75, 2.74, 2.73, 2.72, 2.71, 2.70, 2.69, 2.68, 2.67, 2.66, 2.65, 2.64, 2.63, 2.62, 2.61, 2.60, 2.59, 2.58, 2.57, 2.56, 2.55, 2.54, 2.53, 2.52, 2.51, 2.50, 2.49, 2.48, 2.47, 2.46, 2.45, 2.44, 2.43, 2.42, 2.41, 2.40, 2.39, 2.38, 2.37, 2.36, 2.35, 2.34, 2.33, 2.32, 2.31, 2.30, 2.29, 2.28, 2.27, 2.26, 2.25, 2.24, 2.23, 2.22, 2.21, 2.20, 2.19, 2.18, 2.17, 2.16, 2.15, 2.14, 2.13, 2.12, 2.11, 2.10, 2.09, 2.08, 2.07, 2.06, 2.05, 2.04, 2.03, 2.02, 2.01, 2.00, 1.99, 1.98, 1.97, 1.96, 1.95, 1.94, 1.93, 1.92, 1.91, 1.90, 1.89, 1.88, 1.87, 1.86, 1.85, 1.84, 1.83, 1.82, 1.81, 1.80, 1.79, 1.78, 1.77, 1.76, 1.75, 1.74, 1.73, 1.72, 1.71, 1.70, 1.69, 1.68, 1.67, 1.66, 1.65, 1.64, 1.63, 1.62, 1.61, 1.60, 1.59, 1.58, 1.57, 1.56, 1.55, 1.54, 1.53, 1.52, 1.51, 1.50, 1.49, 1.48, 1.47, 1.46, 1.45, 1.44, 1.43, 1.42, 1.41, 1.40, 1.39, 1.38, 1.37, 1.36, 1.35, 1.34, 1.33, 1.32, 1.31, 1.30, 1.29, 1.28, 1.27, 1.26, 1.25, 1.24, 1.23, 1.22, 1.21, 1.20, 1.19, 1.18, 1.17, 1.16, 1.15, 1.14, 1.13, 1.12, 1.11, 1.10, 1.09, 1.08, 1.07, 1.06,

**(S,S)-(-)-7af**

<sup>13</sup>C NMR spectrum (ppm):

- 141.23, 140.59, 139.62, 138.65, 137.52, 136.55, 135.58, 134.61, 133.23, 132.52, 131.55, 129.23, 128.55, 127.52, 126.55, 125.58, 124.61, 123.23, 122.52, 121.55, 120.58, 119.61, 118.09, 75.51, 58.61, 33.19, 32.53, 31.56

**(±)-7af**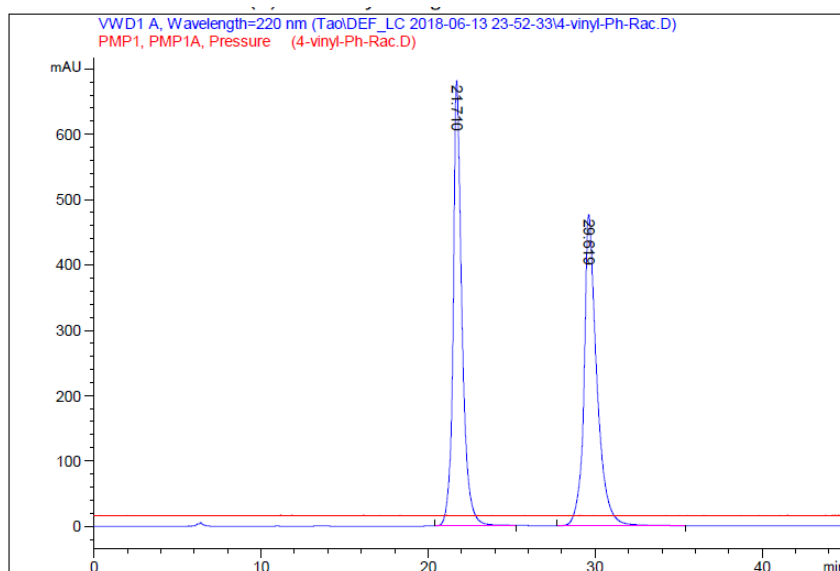

| Peak # | RetTime [min] | Type | Width [min] | Area [mAU*s] | Height [mAU] | Area %  |
|--------|---------------|------|-------------|--------------|--------------|---------|
| 1      | 21.710        | VB   | 0.5359      | 2.51680e4    | 681.17841    | 49.6804 |
| 2      | 29.619        | BB   | 0.7642      | 2.54918e4    | 476.29169    | 50.3196 |

**(1*S*,2*S*)-(-)-7af**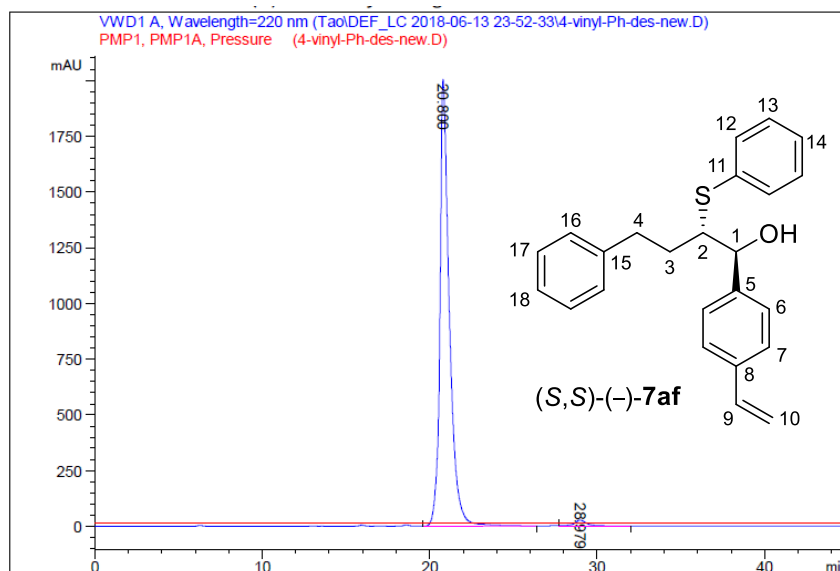

| Peak # | RetTime [min] | Type | Width [min] | Area [mAU*s] | Height [mAU] | Area %  |
|--------|---------------|------|-------------|--------------|--------------|---------|
| 1      | 20.800        | VV   | 0.5652      | 7.90877e4    | 2004.06567   | 98.1262 |
| 2      | 28.979        | VB   | 0.7917      | 1510.24121   | 27.02501     | 1.8738  |

***(S,S)*-(-)-7ag**

Chemical structure of *(S,S)*-(-)-7ag is shown, featuring a central sulfur atom (S) bonded to two chiral centers (C1 and C2) and a central carbon atom (C3). The structure includes a phenyl ring (C4-C9) and a pyridine ring (C10-C15). The stereochemistry is indicated as *(S,S)*.

<sup>1</sup>H NMR spectrum (CDCl<sub>3</sub>) of *(S,S)*-(-)-7ag. The x-axis represents the chemical shift in ppm (f1), ranging from -0.5 to 10.0. The y-axis represents the intensity. The spectrum shows several peaks, with integrations provided below the baseline. The chemical shifts (ppm) are listed on the right side of the spectrum.

Chemical shifts (ppm): 8.80, 8.79, 8.58, 8.57, 7.86, 7.84, 7.83, 7.80, 7.68, 7.67, 7.66, 7.65, 7.64, 7.63, 7.62, 7.61, 7.60, 7.59, 7.58, 7.57, 7.56, 7.55, 7.54, 7.53, 7.52, 7.51, 7.50, 7.49, 7.48, 7.47, 7.46, 7.45, 7.44, 7.43, 7.42, 7.41, 7.40, 7.39, 7.38, 7.37, 7.36, 7.35, 7.34, 7.33, 7.32, 7.31, 7.30, 7.29, 7.28, 7.27, 7.26, 7.25, 7.24, 7.23, 7.22, 7.21, 7.20, 7.19, 7.18, 7.17, 7.16, 7.15, 7.14, 7.13, 7.12, 7.11, 7.10, 7.09, 7.08, 7.07, 7.06, 7.05, 7.04, 7.03, 7.02, 7.01, 7.00, 6.99, 6.98, 6.97, 6.96, 6.95, 6.94, 6.93, 6.92, 6.91, 6.90, 6.89, 6.88, 6.87, 6.86, 6.85, 6.84, 6.83, 6.82, 6.81, 6.80, 6.79, 6.78, 6.77, 6.76, 6.75, 6.74, 6.73, 6.72, 6.71, 6.70, 6.69, 6.68, 6.67, 6.66, 6.65, 6.64, 6.63, 6.62, 6.61, 6.60, 6.59, 6.58, 6.57, 6.56, 6.55, 6.54, 6.53, 6.52, 6.51, 6.50, 6.49, 6.48, 6.47, 6.46, 6.45, 6.44, 6.43, 6.42, 6.41, 6.40, 6.39, 6.38, 6.37, 6.36, 6.35, 6.34, 6.33, 6.32, 6.31, 6.30, 6.29, 6.28, 6.27, 6.26, 6.25, 6.24, 6.23, 6.22, 6.21, 6.20, 6.19, 6.18, 6.17, 6.16, 6.15, 6.14, 6.13, 6.12, 6.11, 6.10, 6.09, 6.08, 6.07, 6.06, 6.05, 6.04, 6.03, 6.02, 6.01, 6.00, 5.99, 5.98, 5.97, 5.96, 5.95, 5.94, 5.93, 5.92, 5.91, 5.90, 5.89, 5.88, 5.87, 5.86, 5.85, 5.84, 5.83, 5.82, 5.81, 5.80, 5.79, 5.78, 5.77, 5.76, 5.75, 5.74, 5.73, 5.72, 5.71, 5.70, 5.69, 5.68, 5.67, 5.66, 5.65, 5.64, 5.63, 5.62, 5.61, 5.60, 5.59, 5.58, 5.57, 5.56, 5.55, 5.54, 5.53, 5.52, 5.51, 5.50, 5.49, 5.48, 5.47, 5.46, 5.45, 5.44, 5.43, 5.42, 5.41, 5.40, 5.39, 5.38, 5.37, 5.36, 5.35, 5.34, 5.33, 5.32, 5.31, 5.30, 5.29, 5.28, 5.27, 5.26, 5.25, 5.24, 5.23, 5.22, 5.21, 5.20, 5.19, 5.18, 5.17, 5.16, 5.15, 5.14, 5.13, 5.12, 5.11, 5.10, 5.09, 5.08, 5.07, 5.06, 5.05, 5.04, 5.03, 5.02, 5.01, 5.00, 4.99, 4.98, 4.97, 4.96, 4.95, 4.94, 4.93, 4.92, 4.91, 4.90, 4.89, 4.88, 4.87, 4.86, 4.85, 4.84, 4.83, 4.82, 4.81, 4.80, 4.79, 4.78, 4.77, 4.76, 4.75, 4.74, 4.73, 4.72, 4.71, 4.70, 4.69, 4.68, 4.67, 4.66, 4.65, 4.64, 4.63, 4.62, 4.61, 4.60, 4.59, 4.58, 4.57, 4.56, 4.55, 4.54, 4.53, 4.52, 4.51, 4.50, 4.49, 4.48, 4.47, 4.46, 4.45, 4.44, 4.43, 4.42, 4.41, 4.40, 4.39, 4.38, 4.37, 4.36, 4.35, 4.34, 4.33, 4.32, 4.31, 4.30, 4.29, 4.28, 4.27, 4.26, 4.25, 4.24, 4.23, 4.22, 4.21, 4.20, 4.19, 4.18, 4.17, 4.16, 4.15, 4.14, 4.13, 4.12, 4.11, 4.10, 4.09, 4.08, 4.07, 4.06, 4.05, 4.04, 4.03, 4.02, 4.01, 4.00, 3.99, 3.98, 3.97, 3.96, 3.95, 3.94, 3.93, 3.92, 3.91, 3.90, 3.89, 3.88, 3.87, 3.86, 3.85, 3.84, 3.83, 3.82, 3.81, 3.80, 3.79, 3.78, 3.77, 3.76, 3.75, 3.74, 3.73, 3.72, 3.71, 3.70, 3.69, 3.68, 3.67, 3.66, 3.65, 3.64, 3.63, 3.62, 3.61, 3.60, 3.59, 3.58, 3.57, 3.56, 3.55, 3.54, 3.53, 3.52, 3.51, 3.50, 3.49, 3.48, 3.47, 3.46, 3.45, 3.44, 3.43, 3.42, 3.41, 3.40, 3.39, 3.38, 3.37, 3.36, 3.35, 3.34, 3.33, 3.32, 3.31, 3.30, 3.29, 3.28, 3.27, 3.26, 3.25, 3.24, 3.23, 3.22, 3.21, 3.20, 3.19, 3.18, 3.17, 3.16, 3.15, 3.14, 3.13, 3.12, 3.11, 3.10, 3.09, 3.08, 3.07, 3.06, 3.05, 3.04, 3.03, 3.02, 3.01, 3.00, 2.99, 2.98, 2.97, 2.96, 2.95, 2.94, 2.93, 2.92, 2.91, 2.90, 2.89, 2.88, 2.87, 2.86, 2.85, 2.84, 2.83, 2.82, 2.81, 2.80, 2.79, 2.78, 2.77, 2.76, 2.75, 2.74, 2.73, 2.72, 2.71, 2.70, 2.69, 2.68, 2.67, 2.66, 2.65, 2.64, 2.63, 2.62, 2.61, 2.60, 2.59, 2.58, 2.57, 2.56, 2.55, 2.54, 2.53, 2.52, 2.51, 2.50, 2.49, 2.48, 2.47, 2.46, 2.45, 2.44, 2.43, 2.42, 2.41, 2.40, 2.39, 2.38, 2.37, 2.36, 2.35, 2.34, 2.33, 2.32, 2.31, 2.30, 2.29, 2.28, 2.27, 2.26, 2.25, 2.24, 2.23, 2.22, 2.21, 2.20, 2.19, 2.18, 2.17, 2.16, 2.15, 2.14, 2.13, 2.12, 2.11, 2.10, 2.09, 2.08, 2.07, 2.06, 2.05, 2.04, 2.03, 2.02, 2.01, 2.00, 1.99, 1.98, 1.97, 1.96, 1.95, 1.94, 1.93, 1.92, 1.91, 1.90, 1.89, 1.88, 1.87, 1.86, 1.85, 1.84, 1.83, 1.82, 1.81, 1.80, 1.79, 1.78, 1.77, 1.76, 1.75, 1.74, 1.73, 1.72, 1.71, 1.70, 1.69, 1.68, 1.67, 1.66, 1.65, 1.64, 1.63, 1.62, 1.61, 1.60, 1.59, 1.58, 1.57, 1.56, 1.55, 1.54, 1.53, 1.52, 1.51

**(S,S)-(-)-7ag**

Chemical structure of (S,S)-(-)-7ag is shown, featuring a central chiral center (C1) bonded to a hydroxyl group (OH), a phenyl ring (C5-C11), a pyridine ring (C8-C13), and a side chain (C2-C4) containing a sulfur atom (S) and a phenyl ring (C14-C17). The side chain is further substituted with a phenyl ring (C18-C21).

<sup>13</sup>C NMR spectrum (f1, ppm) showing chemical shifts (ppm) for the compound. The spectrum displays peaks corresponding to the structure, with labeled values: 148.55, 146.55, 141.22, 141.20, 137.52, 136.41, 134.45, 133.37, 133.01, 128.11, 128.55, 128.49, 128.00, 127.58, 127.17, 126.11, 123.70, 75.30, 58.41, 33.22, and 32.40.

**(±)-7ag**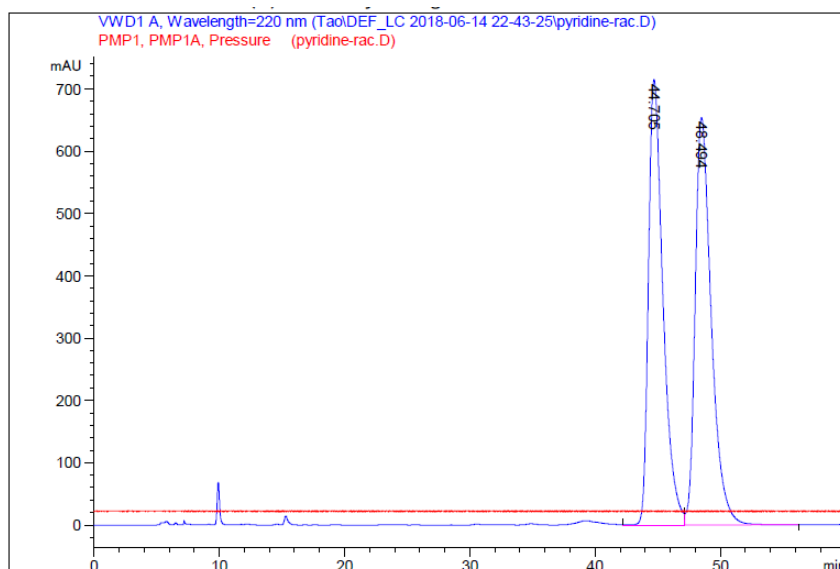

| Peak # | RetTime [min] | Type | Width [min] | Area [mAU*s] | Height [mAU] | Area %  |
|--------|---------------|------|-------------|--------------|--------------|---------|
| 1      | 44.705        | VV   | 1.2275      | 5.77291e4    | 714.88391    | 49.5748 |
| 2      | 48.494        | VB   | 1.3621      | 5.87193e4    | 653.95715    | 50.4252 |

**(1*S*,2*S*)-(-)-7ag**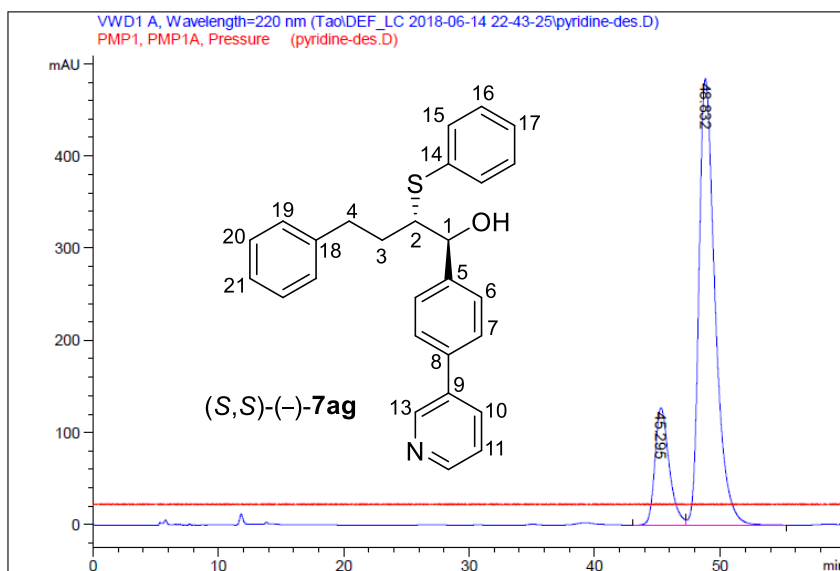

| Peak # | RetTime [min] | Type | Width [min] | Area [mAU*s] | Height [mAU] | Area %  |
|--------|---------------|------|-------------|--------------|--------------|---------|
| 1      | 45.295        | VV   | 1.2029      | 1.00680e4    | 127.20917    | 18.8777 |
| 2      | 48.832        | VB   | 1.3565      | 4.32647e4    | 484.43036    | 81.1223 |

**(3*S*,4*S*)-(+)-7ah**  $^1\text{H}$  NMR (500 MHz,  $\text{CDCl}_3$ )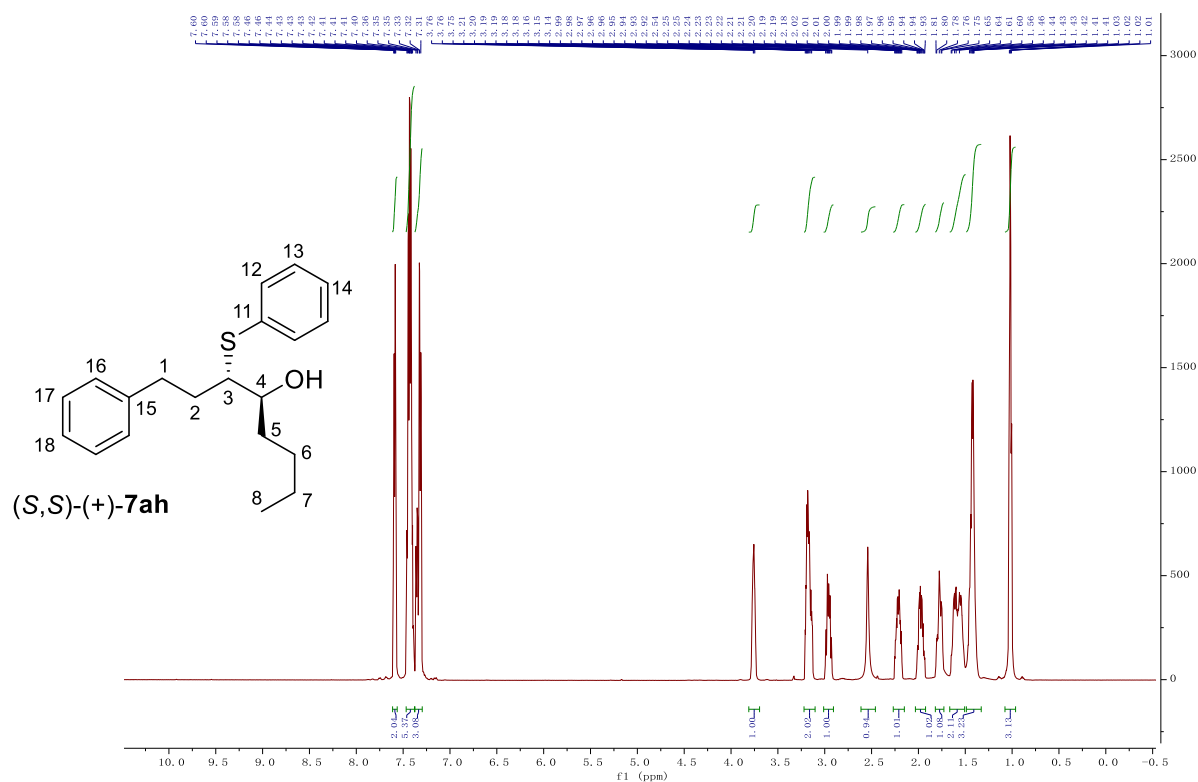**(3*S*,4*S*)-(+)-7ah**  $^{13}\text{C}$  NMR (126 MHz,  $\text{CDCl}_3$ )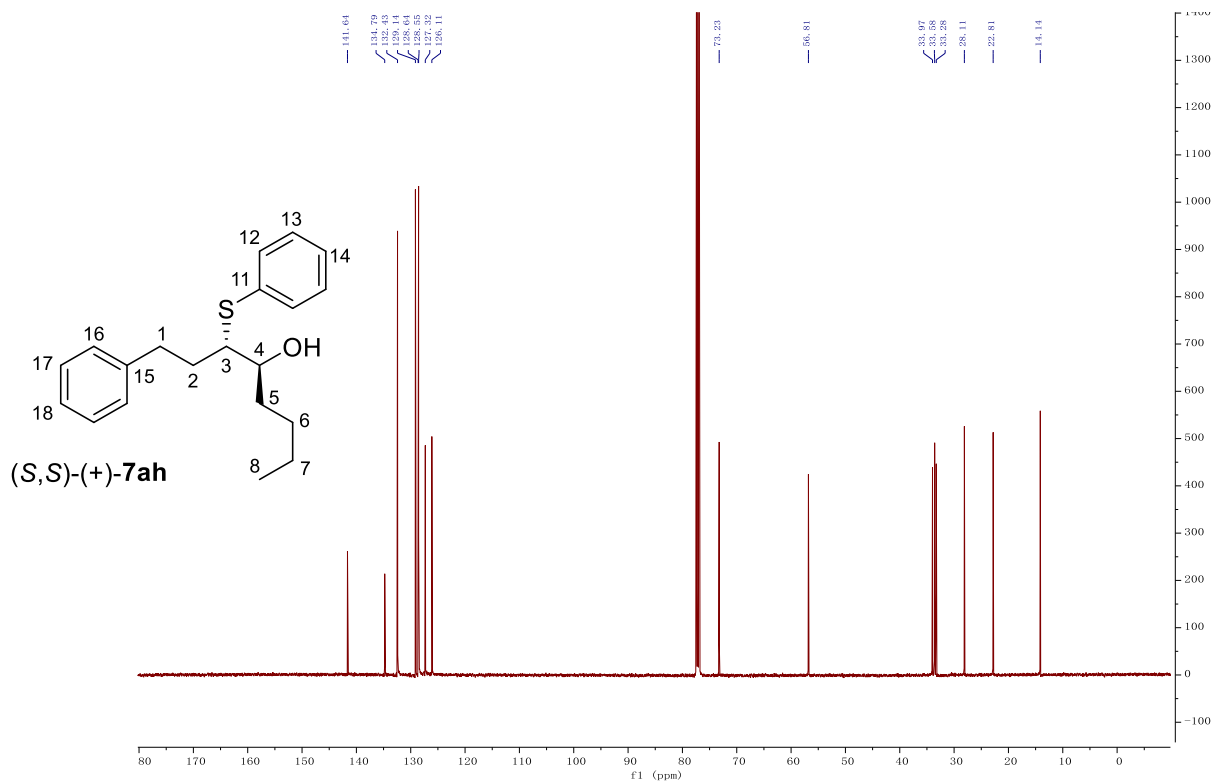

**(±)-7ah**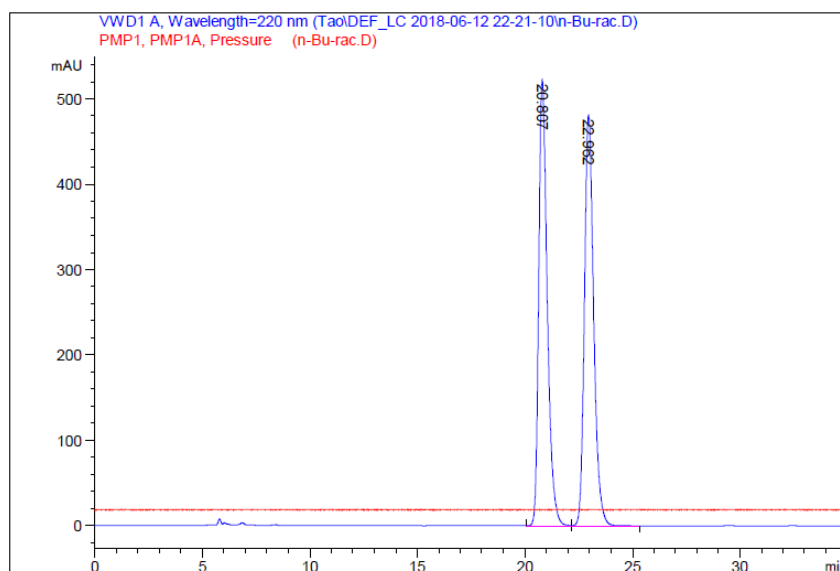

| Peak # | RetTime [min] | Type | Width [min] | Area [mAU*s] | Height [mAU] | Area %  |
|--------|---------------|------|-------------|--------------|--------------|---------|
| 1      | 20.807        | VV   | 0.4138      | 1.43681e4    | 522.80737    | 49.9873 |
| 2      | 22.962        | VB   | 0.4530      | 1.43754e4    | 481.65756    | 50.0127 |

**(3*S*,4*S*)-(+)-7ah**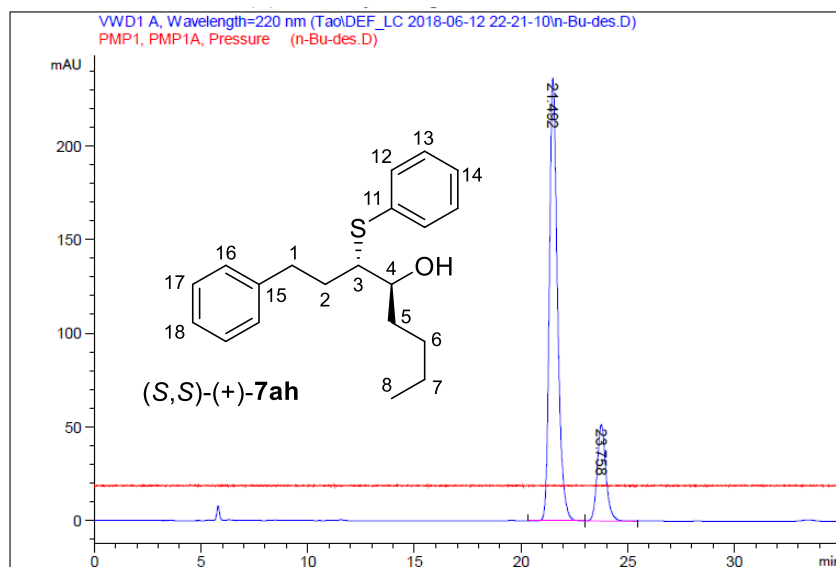

| Peak # | RetTime [min] | Type | Width [min] | Area [mAU*s] | Height [mAU] | Area %  |
|--------|---------------|------|-------------|--------------|--------------|---------|
| 1      | 21.492        | VV   | 0.4017      | 6251.44336   | 236.41179    | 80.8290 |
| 2      | 23.758        | VB   | 0.4413      | 1482.72009   | 51.40772     | 19.1710 |

[illegible]

**(S,S)-(-)-7ai**

<sup>1</sup>H NMR (400 MHz, CDCl<sub>3</sub>) peaks (ppm): 7.74, 7.27, 5.78, 3.29, 3.16, 20.97.

<sup>13</sup>C NMR (100 MHz, CDCl<sub>3</sub>) peaks (ppm): 140.97, 137.28, 134.39, 132.10, 131.61, 128.43, 128.61, 127.72, 126.07, 77.41, 72.27, 55.78, 32.94, 31.63, 20.97.

**(±)-7ai**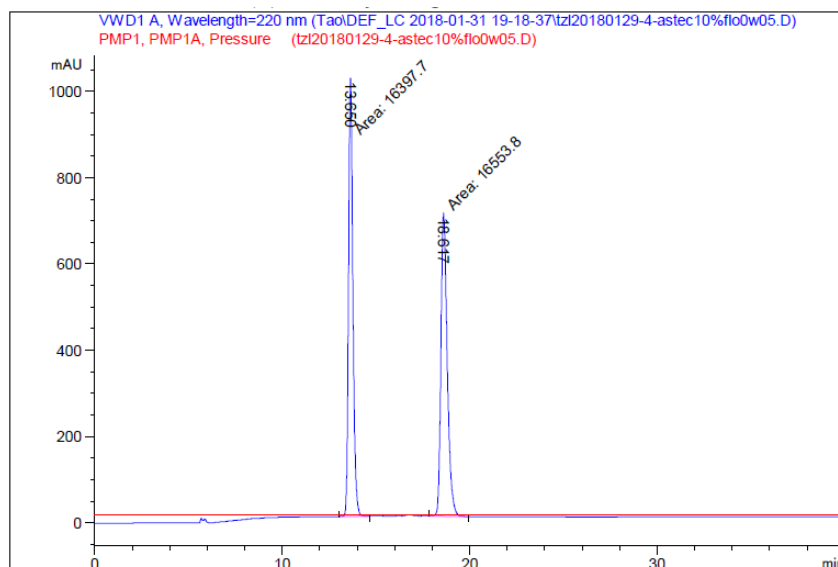

| Peak # | RetTime [min] | Type | Width [min] | Area [mAU*s] | Height [mAU] | Area %  |
|--------|---------------|------|-------------|--------------|--------------|---------|
| 1      | 13.650        | MM   | 0.2685      | 1.63977e4    | 1017.74811   | 49.7631 |
| 2      | 18.617        | MM   | 0.3928      | 1.65538e4    | 702.31897    | 50.2369 |

**(1*S*,2*S*)-(-)-7ai**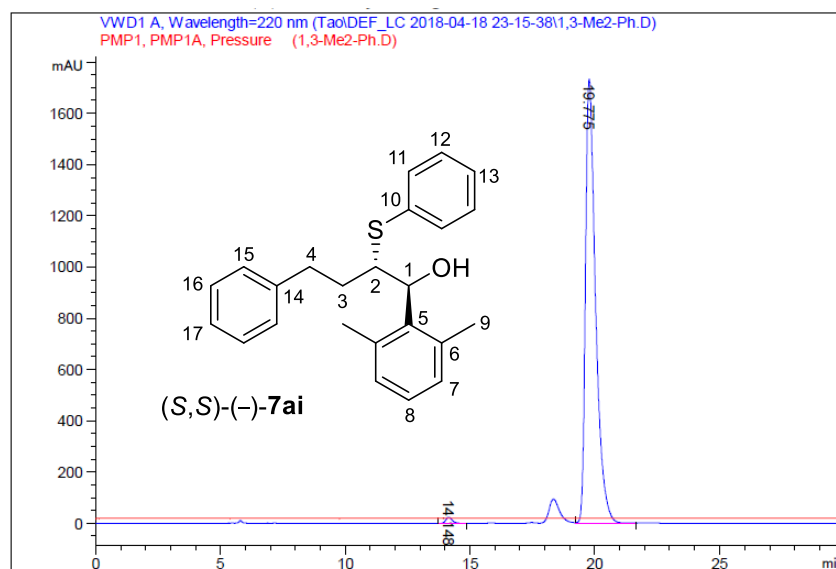

| Peak # | RetTime [min] | Type | Width [min] | Area [mAU*s] | Height [mAU] | Area %  |
|--------|---------------|------|-------------|--------------|--------------|---------|
| 1      | 14.148        | VV   | 0.2639      | 429.90598    | 24.39105     | 0.8736  |
| 2      | 19.775        | VV   | 0.4217      | 4.87823e4    | 1732.55920   | 99.1264 |

$(1S,2S)$ -(-)-**7aj**  $^1\text{H}$  NMR (500 MHz,  $\text{CDCl}_3$ )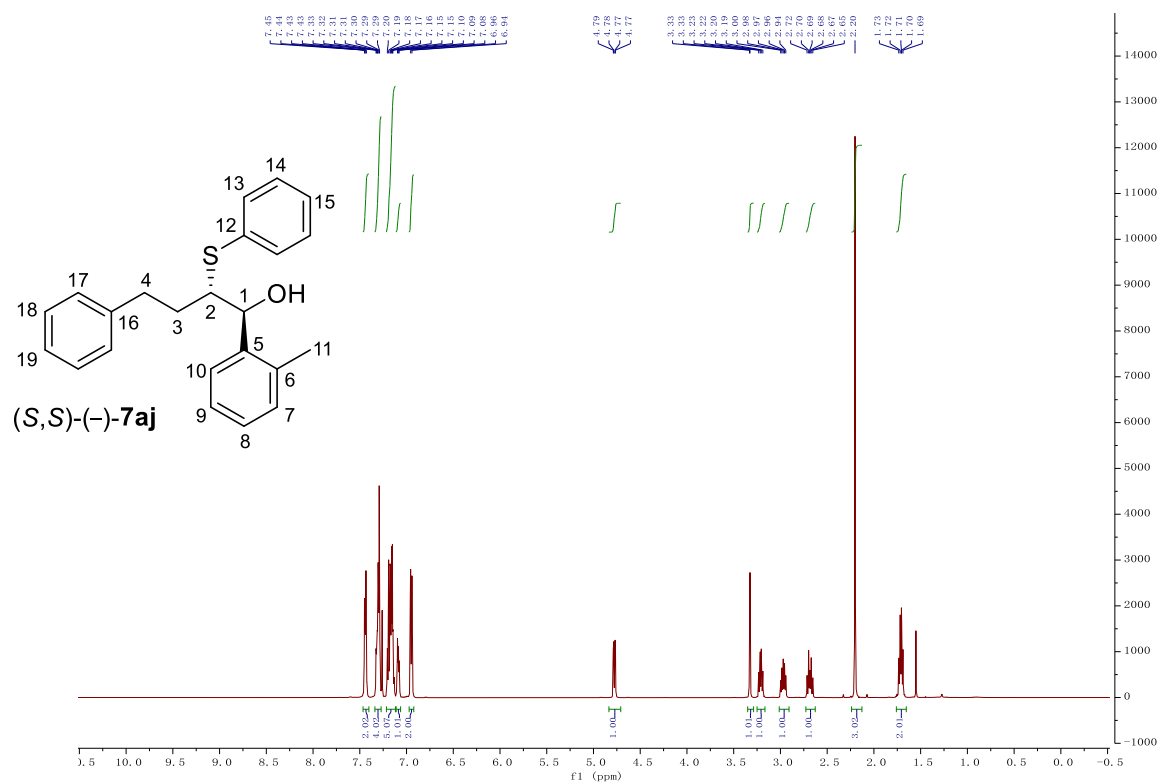 $(1S,2S)$ -(-)-**7aj**  $^{13}\text{C}$  NMR (126 MHz,  $\text{CDCl}_3$ )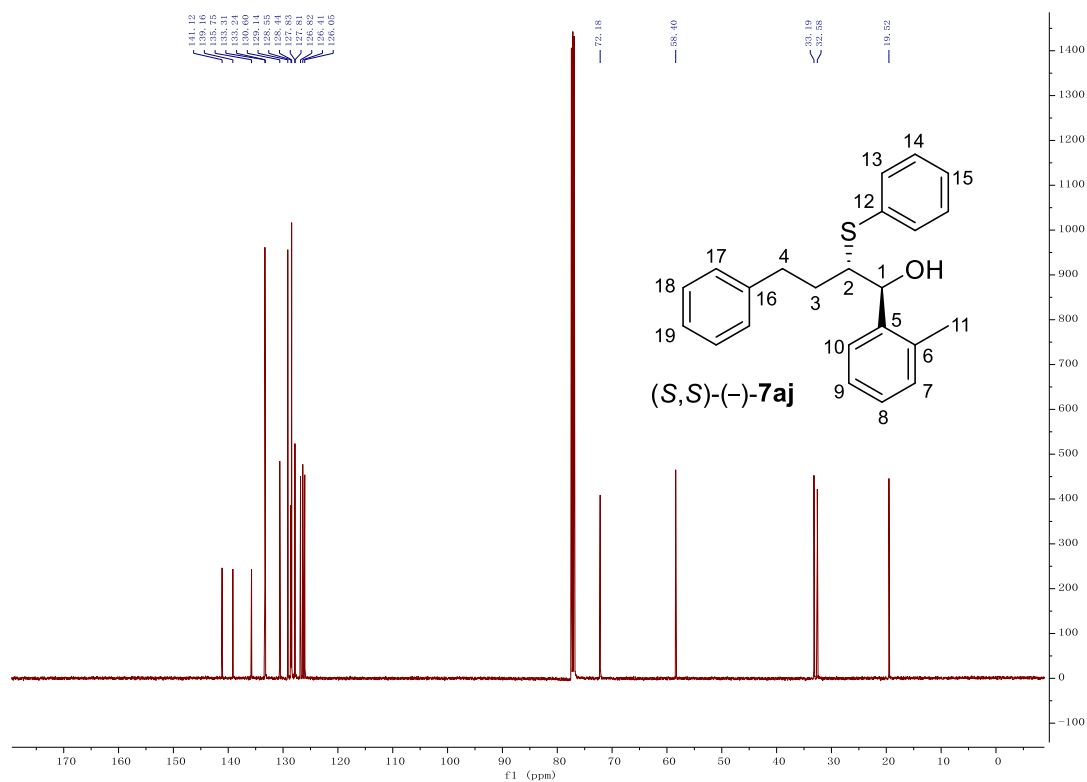

**(±)-7aj**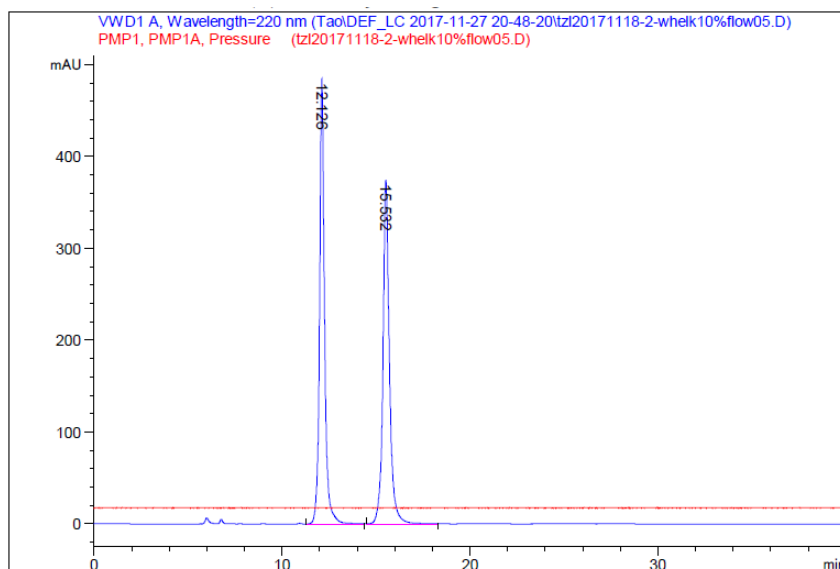

| Peak # | RetTime [min] | Type | Width [min] | Area [mAU*s] | Height [mAU] | Area %  |
|--------|---------------|------|-------------|--------------|--------------|---------|
| 1      | 12.126        | VB   | 0.2766      | 9072.51172   | 484.67969    | 49.9995 |
| 2      | 15.532        | BV   | 0.3585      | 9072.67676   | 374.28107    | 50.0005 |

**(1*S*,2*S*)-(-)-7aj**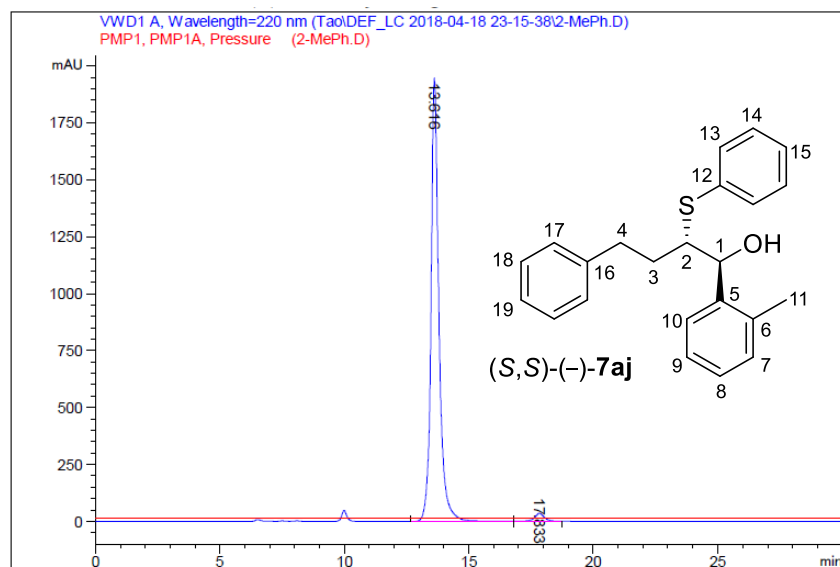

| Peak # | RetTime [min] | Type | Width [min] | Area [mAU*s] | Height [mAU] | Area %  |
|--------|---------------|------|-------------|--------------|--------------|---------|
| 1      | 13.616        | VV   | 0.3236      | 4.32432e4    | 1943.79797   | 97.5064 |
| 2      | 17.833        | VV   | 0.4381      | 1105.90918   | 36.18745     | 2.4936  |

(1*S*,2*S*)-(-)-**7ak** <sup>1</sup>H NMR (500 MHz, CDCl<sub>3</sub>)

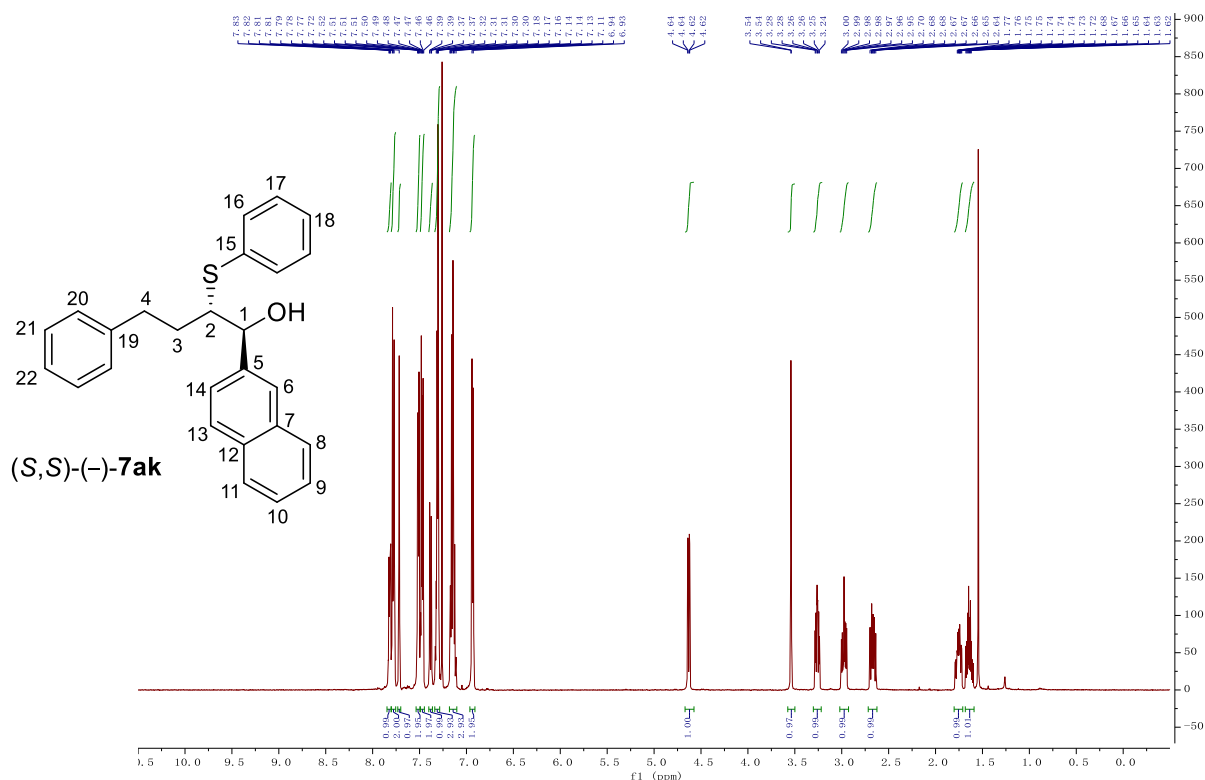

(1*S*,2*S*)-(-)-**7ak** <sup>13</sup>C NMR (126 MHz, CDCl<sub>3</sub>)

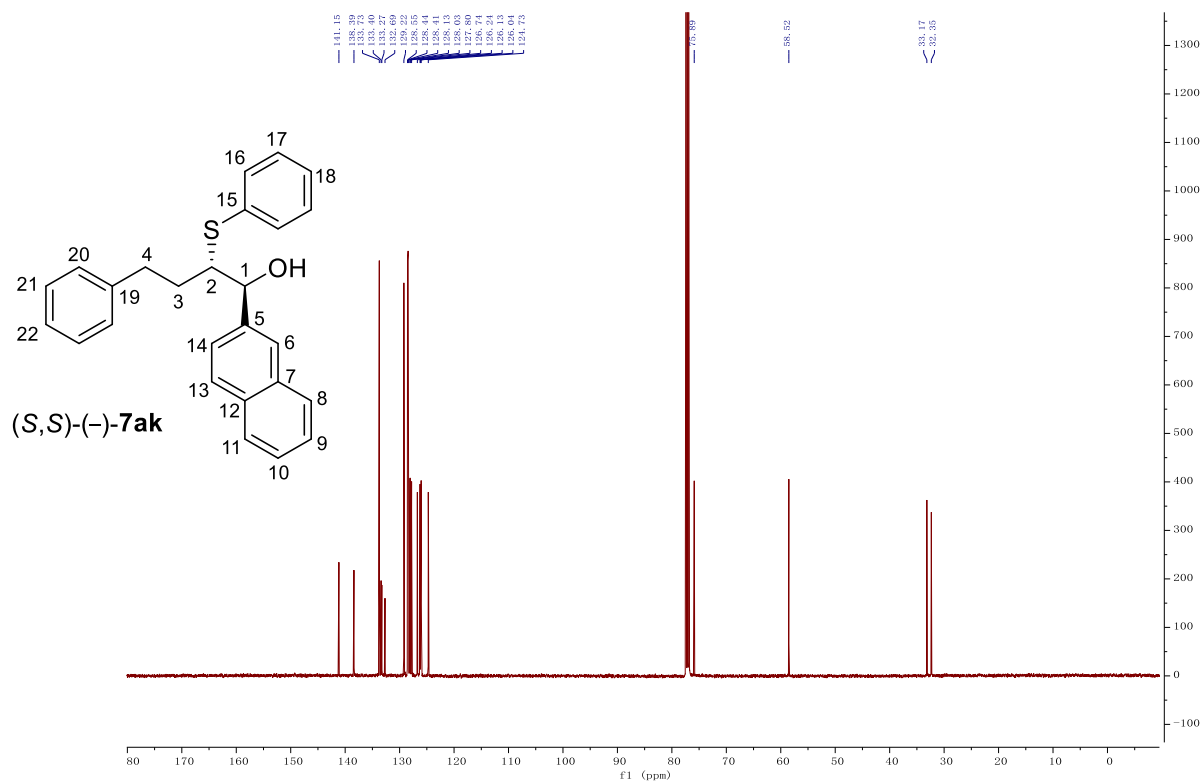

**(±)-7ak**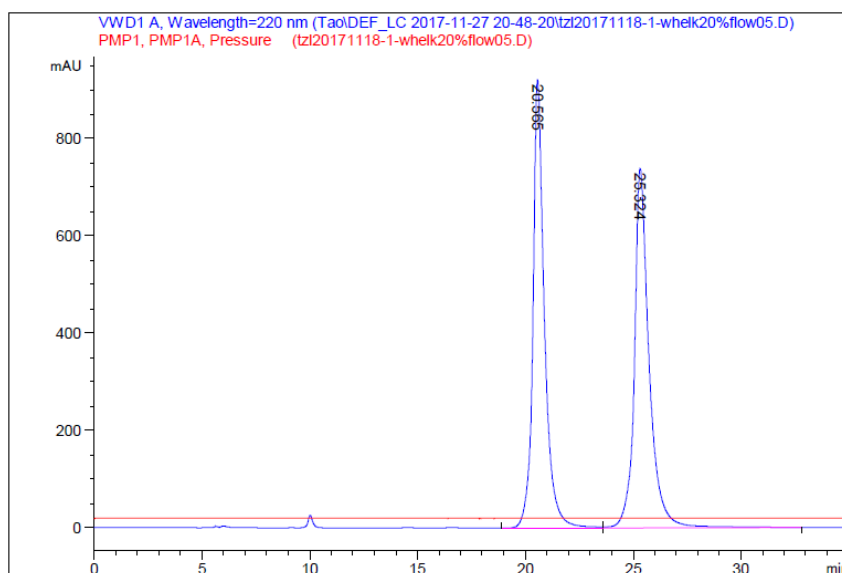

| Peak # | RetTime [min] | Type | Width [min] | Area [mAU*s] | Height [mAU] | Area %  |
|--------|---------------|------|-------------|--------------|--------------|---------|
| 1      | 20.565        | VV   | 0.5397      | 3.43348e4    | 921.22711    | 49.3466 |
| 2      | 25.324        | VB   | 0.6909      | 3.52441e4    | 738.25415    | 50.6534 |

**(1*S*,2*S*)-(-)-7ak**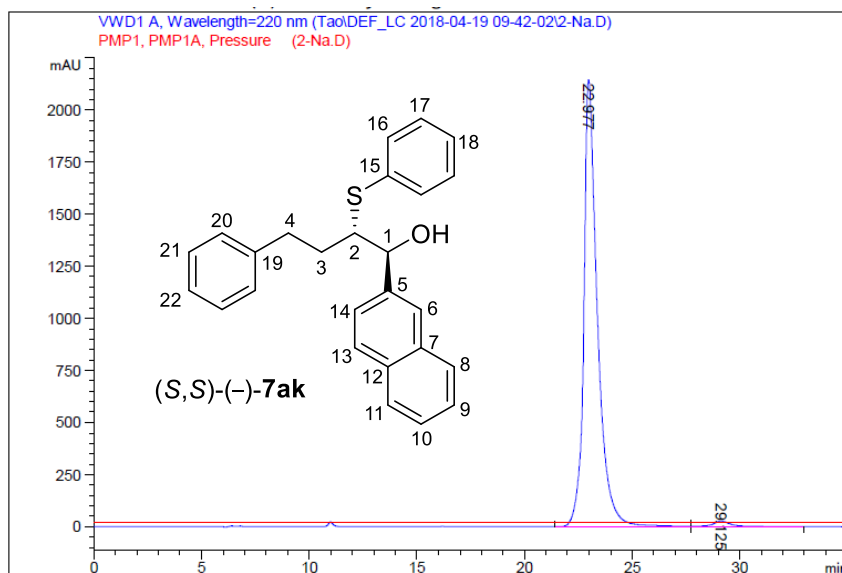

| Peak # | RetTime [min] | Type | Width [min] | Area [mAU*s] | Height [mAU] | Area %  |
|--------|---------------|------|-------------|--------------|--------------|---------|
| 1      | 22.977        | VV   | 0.6365      | 9.46292e4    | 2147.19995   | 98.2510 |
| 2      | 29.125        | VB   | 0.8882      | 1684.48413   | 27.10070     | 1.7490  |

**(1*S*,2*S*)-(-)-7al**  $^1\text{H}$  NMR (500 MHz,  $\text{CDCl}_3$ )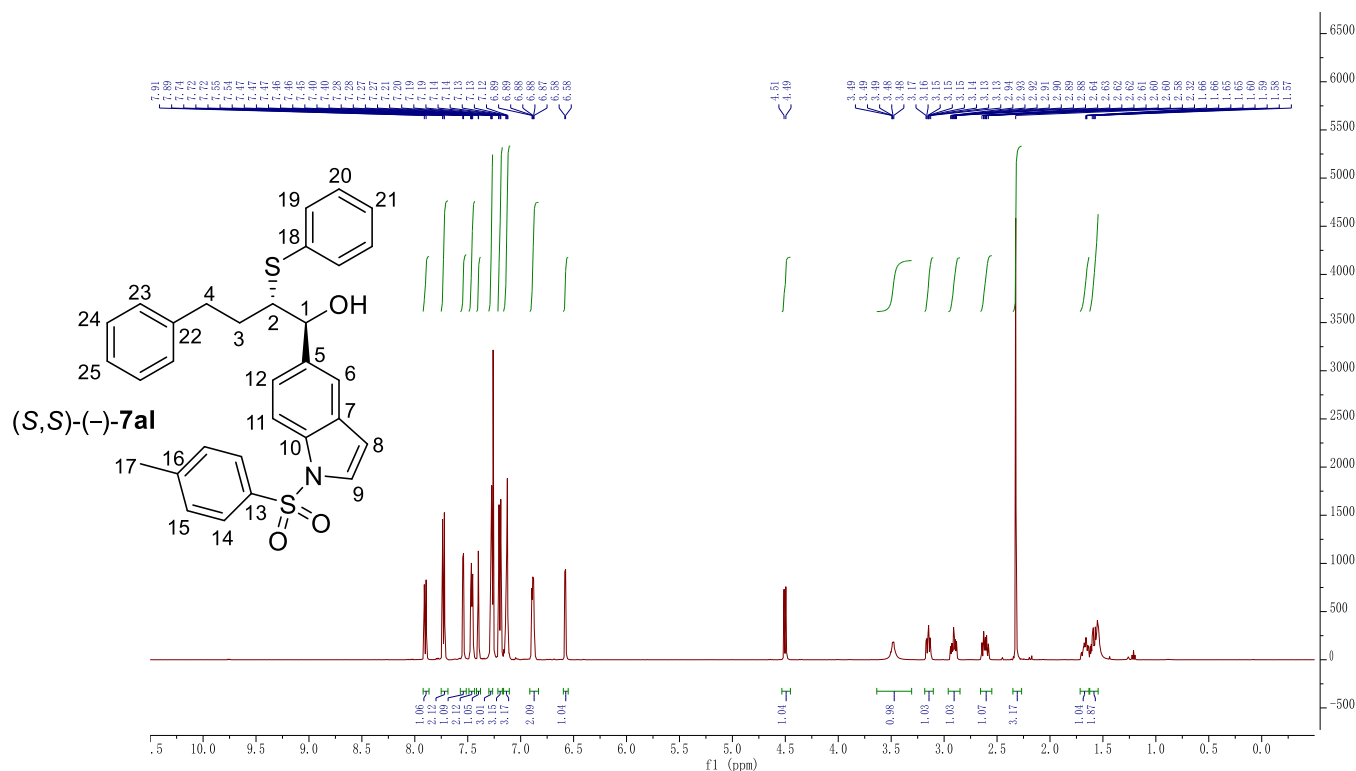**(1*S*,2*S*)-(-)-7al**  $^{13}\text{C}$  NMR (126 MHz,  $\text{CDCl}_3$ )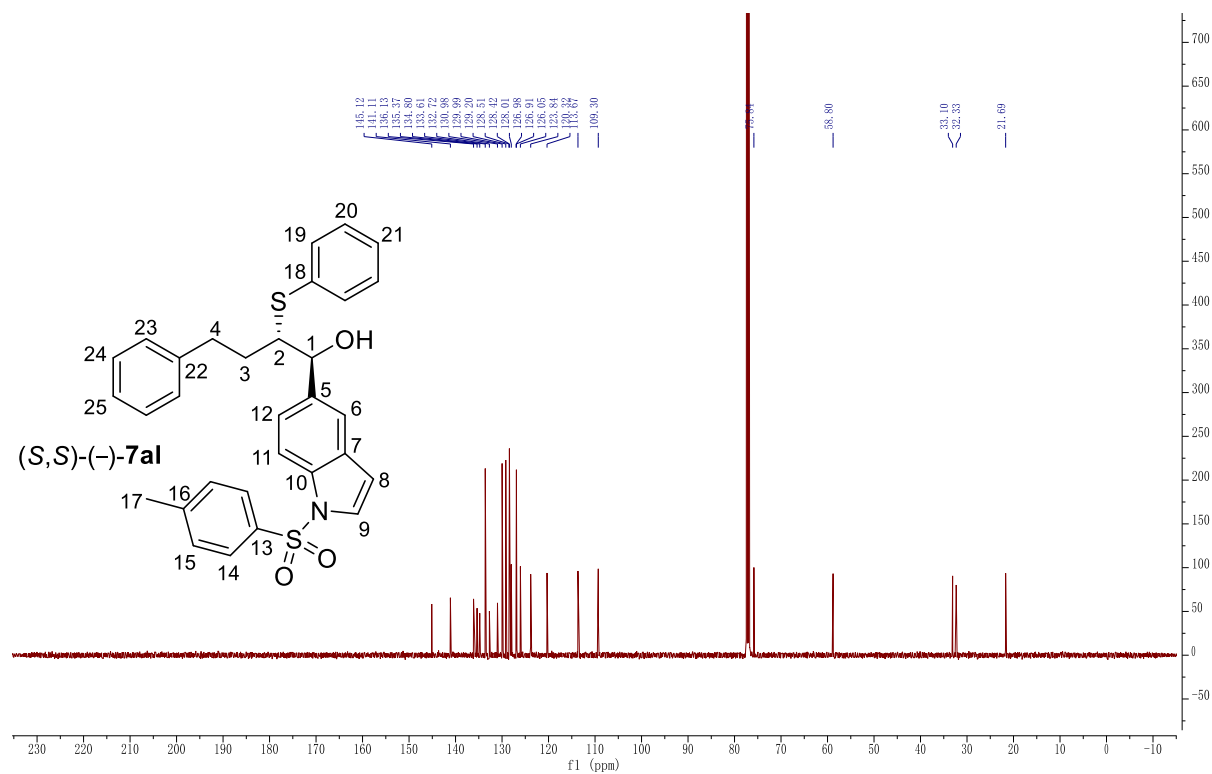

**(±)-7al**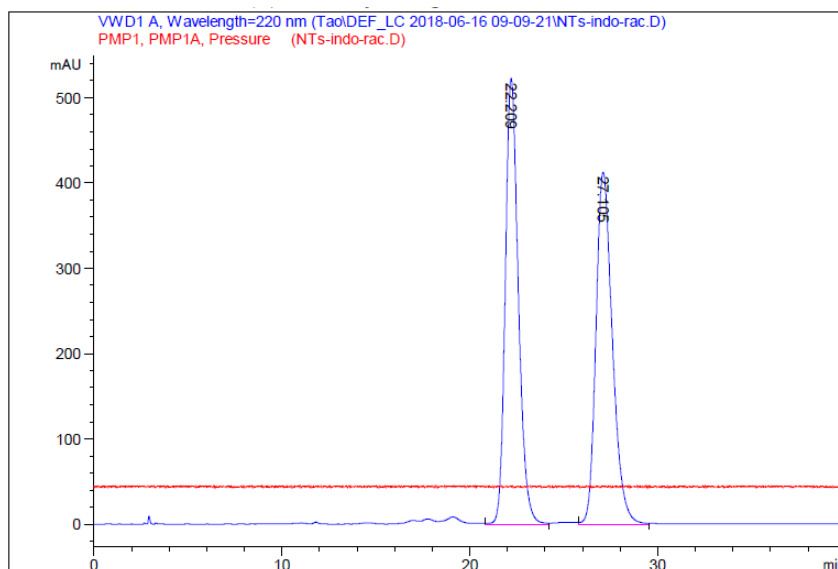

| Peak # | RetTime [min] | Type | Width [min] | Area [mAU*s] | Height [mAU] | Area %  |
|--------|---------------|------|-------------|--------------|--------------|---------|
| 1      | 22.209        | VV   | 0.7442      | 2.52368e4    | 522.37842    | 50.1089 |
| 2      | 27.105        | VV   | 0.9143      | 2.51272e4    | 412.64096    | 49.8911 |

**(1*S*,2*S*)-(-)-7al**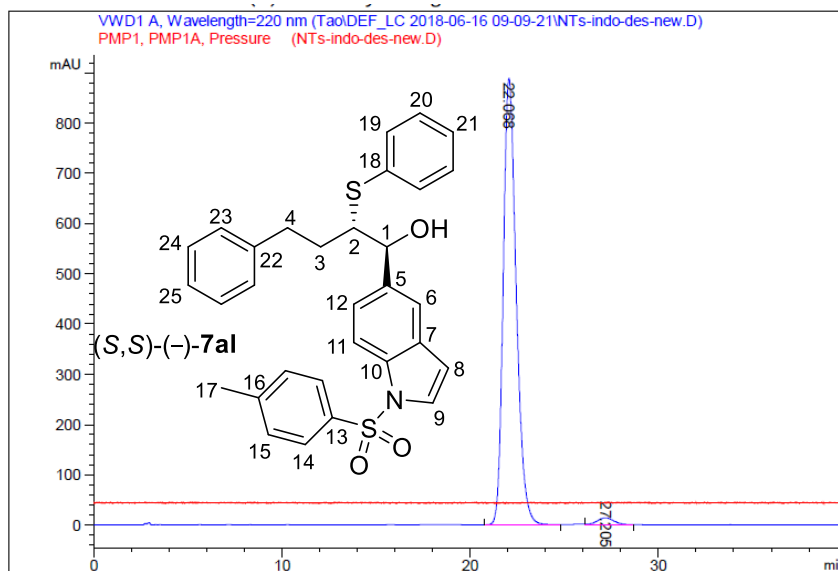

| Peak # | RetTime [min] | Type | Width [min] | Area [mAU*s] | Height [mAU] | Area %  |
|--------|---------------|------|-------------|--------------|--------------|---------|
| 1      | 22.068        | VV   | 0.7361      | 4.28058e4    | 889.57593    | 97.8795 |
| 2      | 27.205        | VV   | 0.9758      | 927.36139    | 14.45214     | 2.1205  |

(1*S*,2*S*)-(-)-**7am** <sup>1</sup>H NMR (500 MHz, CDCl<sub>3</sub>)

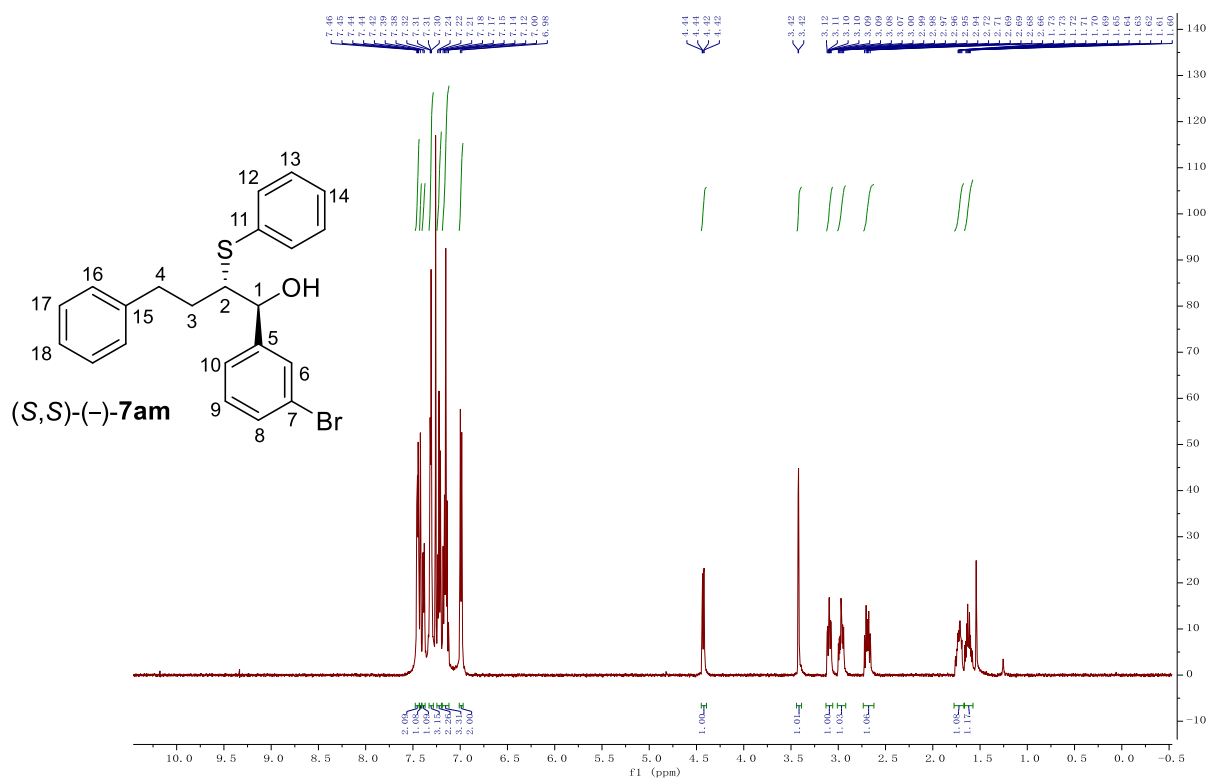

(1*S*,2*S*)-(-)-**7am** <sup>13</sup>C NMR (126 MHz, CDCl<sub>3</sub>)

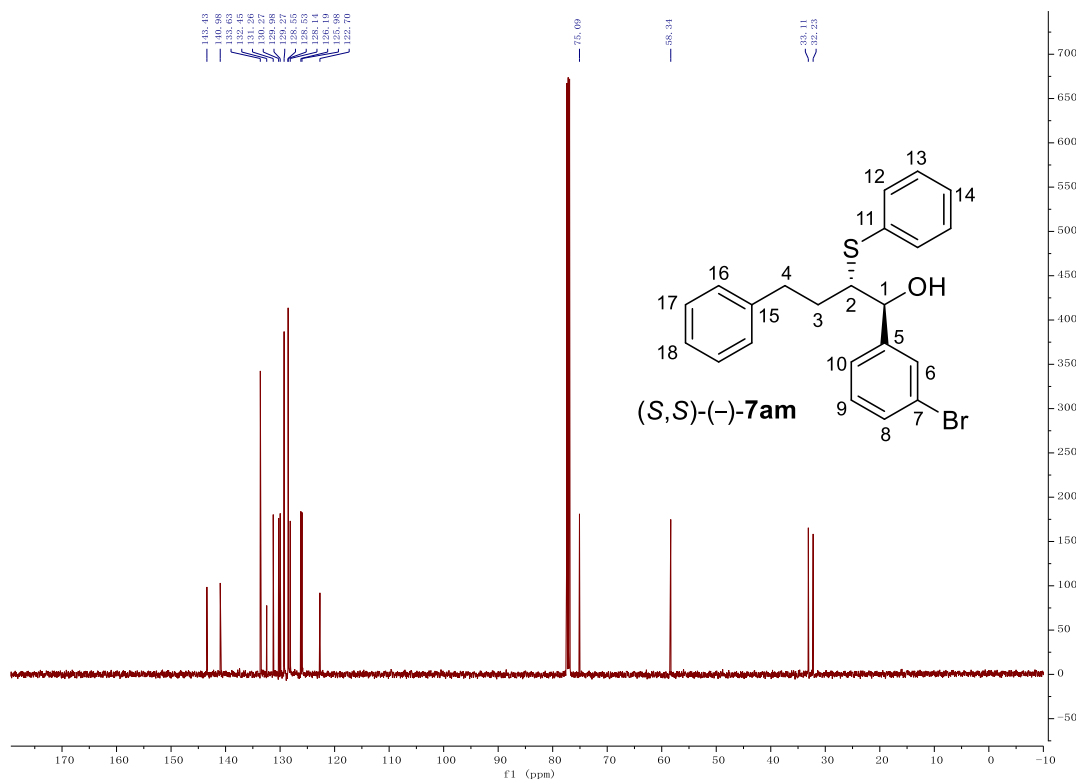

**(±)-7am**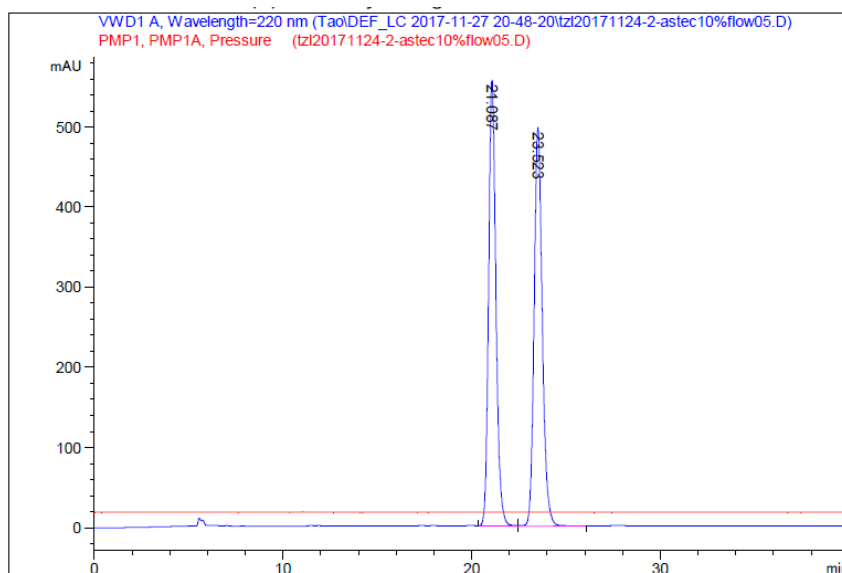

| Peak # | RetTime [min] | Type | Width [min] | Area [mAU*s] | Height [mAU] | Area %  |
|--------|---------------|------|-------------|--------------|--------------|---------|
| 1      | 21.087        | VV   | 0.4135      | 1.49957e4    | 556.37280    | 50.0056 |
| 2      | 23.523        | VB   | 0.4628      | 1.49923e4    | 496.67096    | 49.9944 |

**(1*S*,2*S*)-(-)-7am**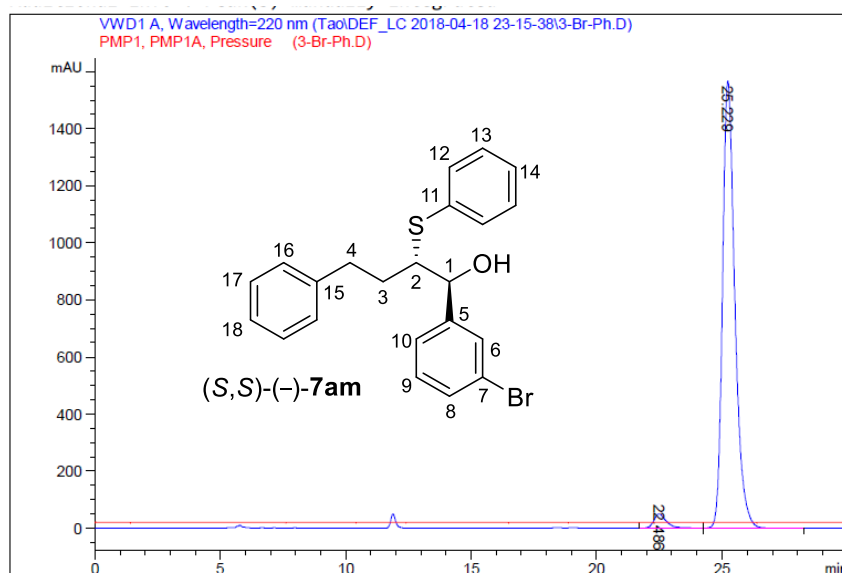

| Peak # | RetTime [min] | Type | Width [min] | Area [mAU*s] | Height [mAU] | Area %  |
|--------|---------------|------|-------------|--------------|--------------|---------|
| 1      | 22.486        | VV   | 0.5091      | 1738.37292   | 50.17261     | 3.1500  |
| 2      | 25.229        | VB   | 0.5262      | 5.34483e4    | 1566.61670   | 96.8500 |

$(1S,2S)$ -(-)-**7an**  $^1\text{H}$  NMR (500 MHz,  $\text{CDCl}_3$ )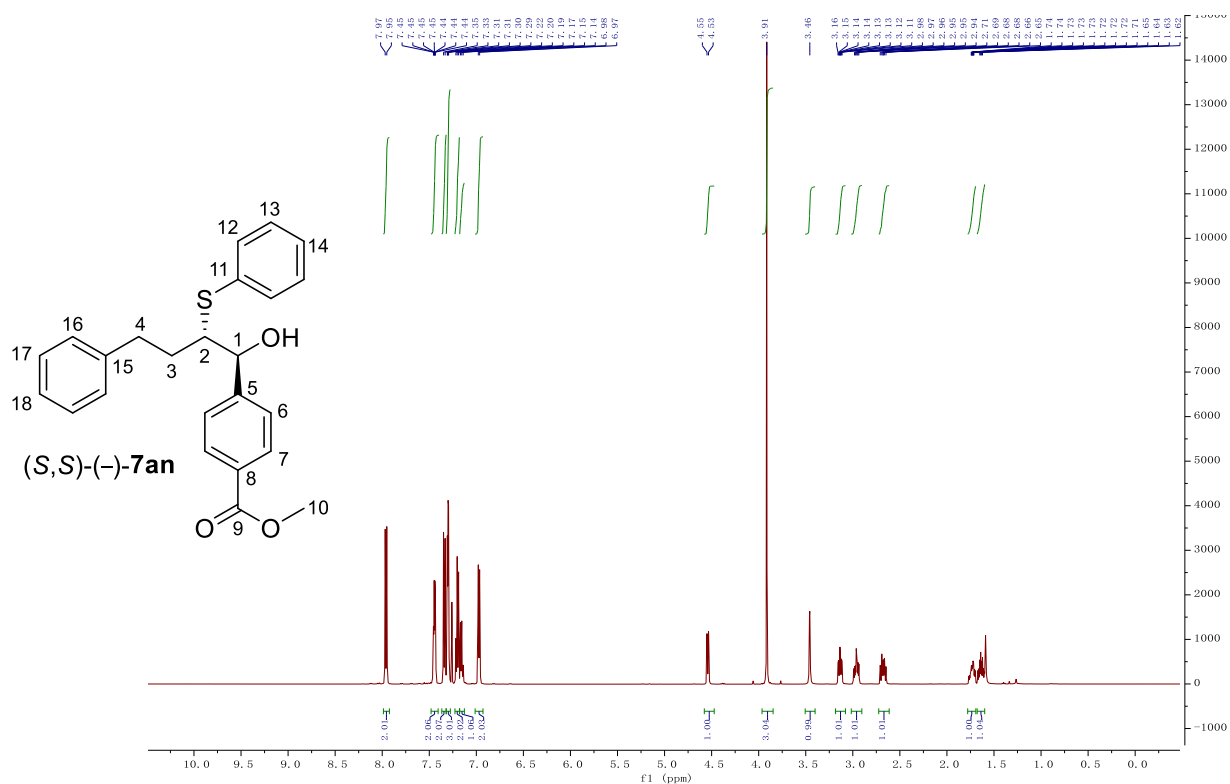 $(1S,2S)$ -(-)-**7an**  $^{13}\text{C}$  NMR (126 MHz,  $\text{CDCl}_3$ )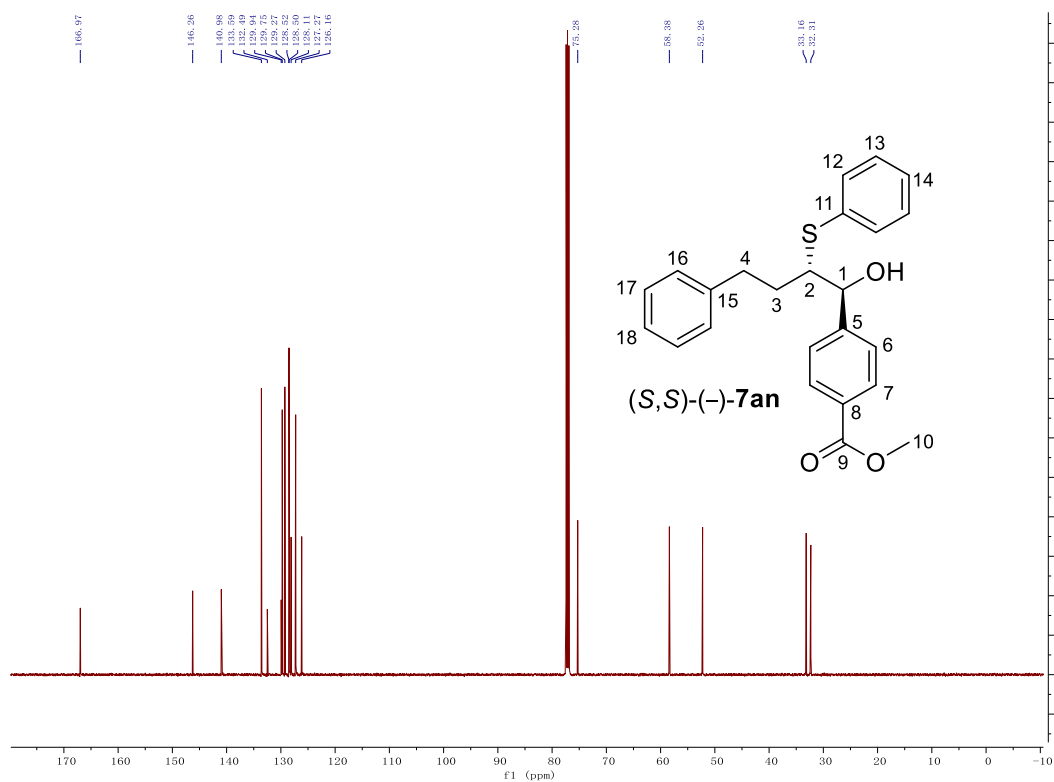

**(±)-7an**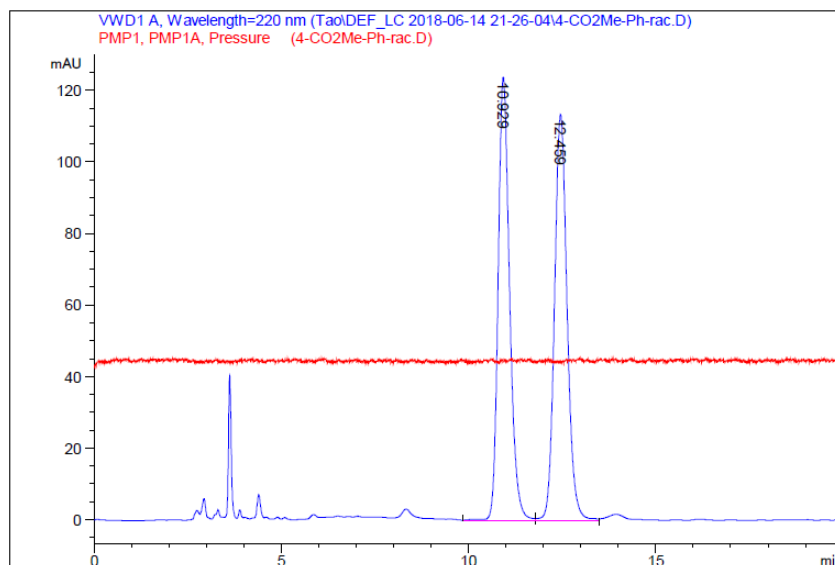

| Peak # | RetTime [min] | Type | Width [min] | Area [mAU*s] | Height [mAU] | Area %  |
|--------|---------------|------|-------------|--------------|--------------|---------|
| 1      | 10.929        | VV   | 0.3306      | 2639.82178   | 123.63731    | 49.8346 |
| 2      | 12.459        | VV   | 0.3609      | 2657.34497   | 113.34393    | 50.1654 |

**(1*S*,2*S*)-(-)-7an**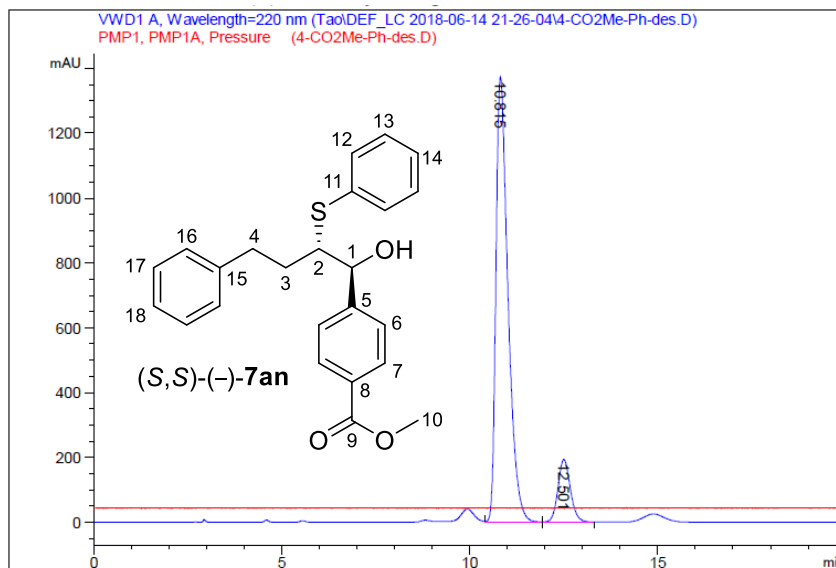

| Peak # | RetTime [min] | Type | Width [min] | Area [mAU*s] | Height [mAU] | Area %  |
|--------|---------------|------|-------------|--------------|--------------|---------|
| 1      | 10.815        | VV   | 0.3361      | 3.06495e4    | 1373.04602   | 87.2168 |
| 2      | 12.501        | VV   | 0.3520      | 4492.22461   | 193.80582    | 12.7832 |

$(1S,2S)$ -(-)-**7ba**  $^1\text{H}$  NMR (500 MHz,  $\text{CDCl}_3$ )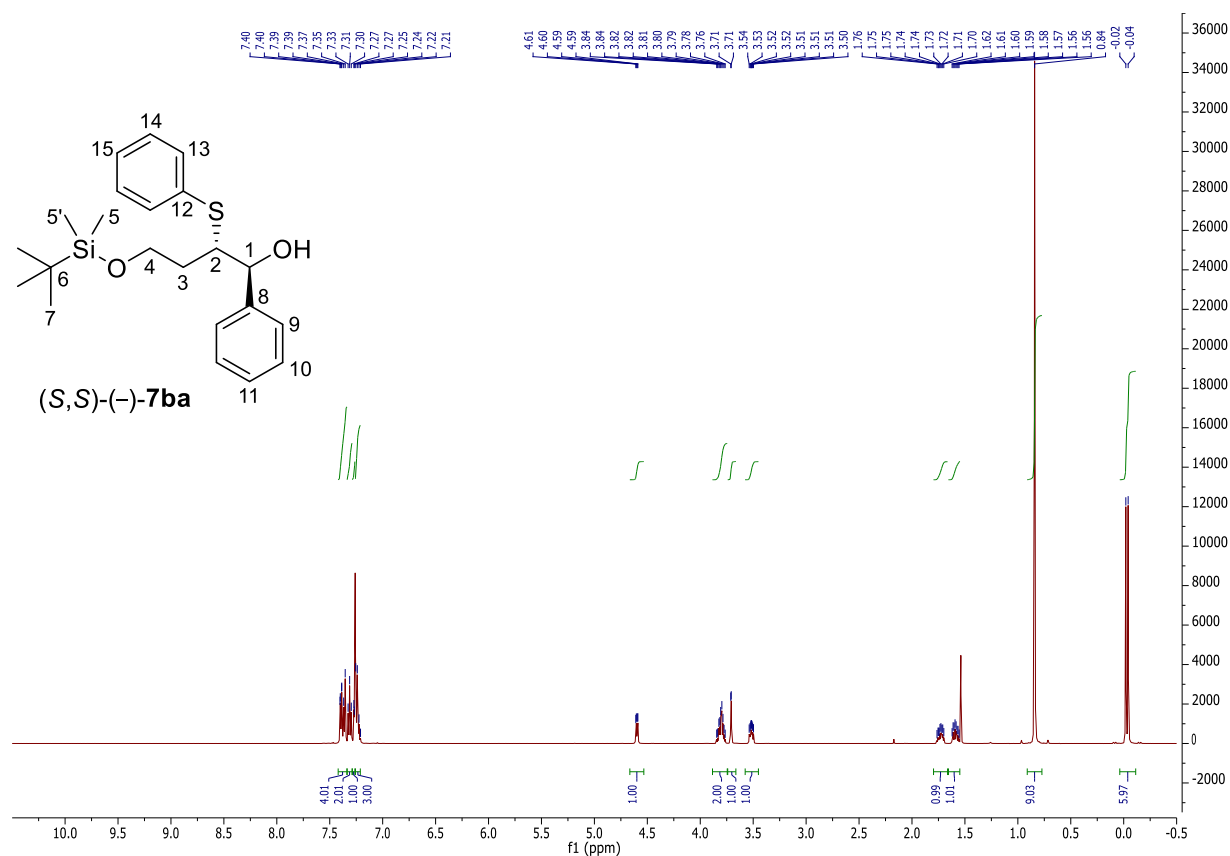 $(1S,2S)$ -(-)-**7ba**  $^{13}\text{C}$  NMR (126 MHz,  $\text{CDCl}_3$ )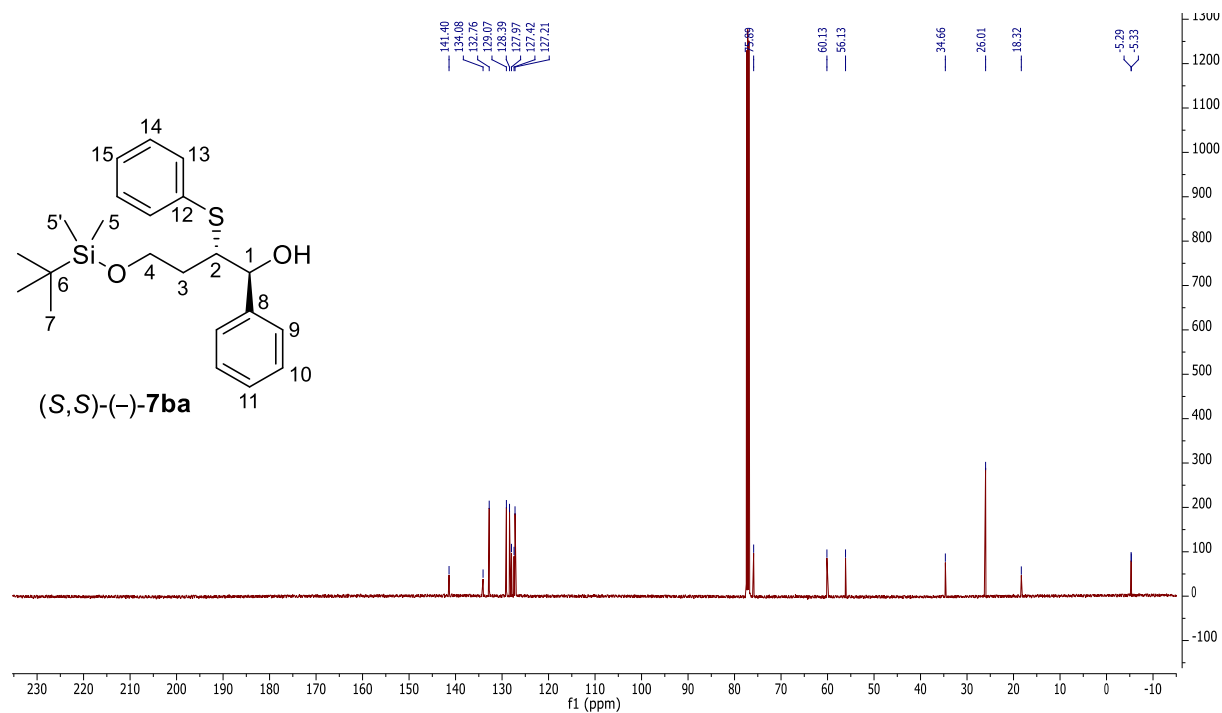

**(±)-7ba**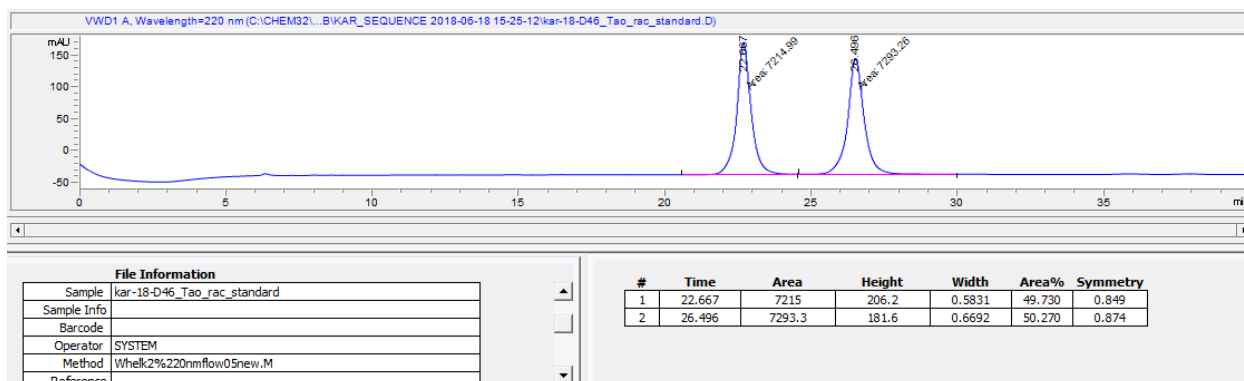**(1*S*,2*S*)-(-)-7ba**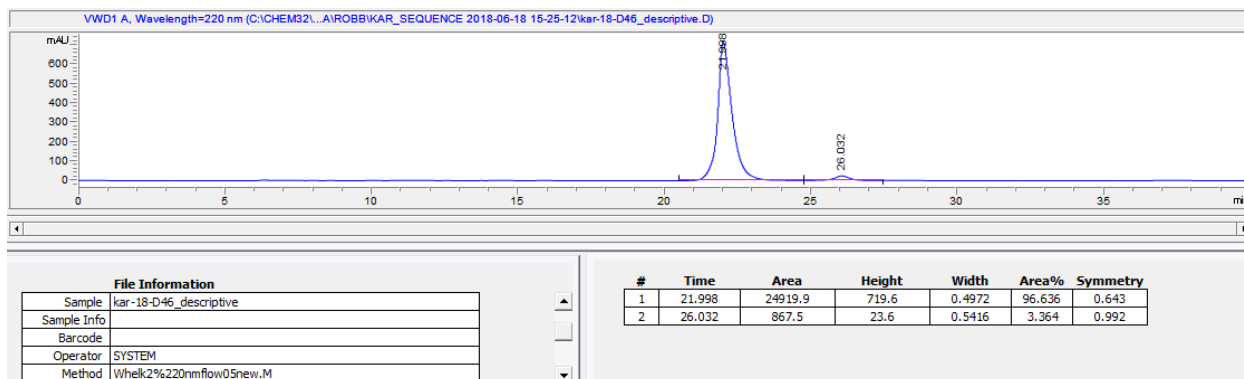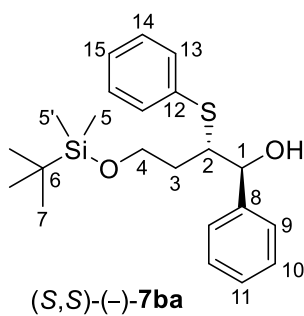

(1*S*,2*S*)-(+)-**10ca**  $^1\text{H}$  NMR (500 MHz,  $\text{CDCl}_3$ )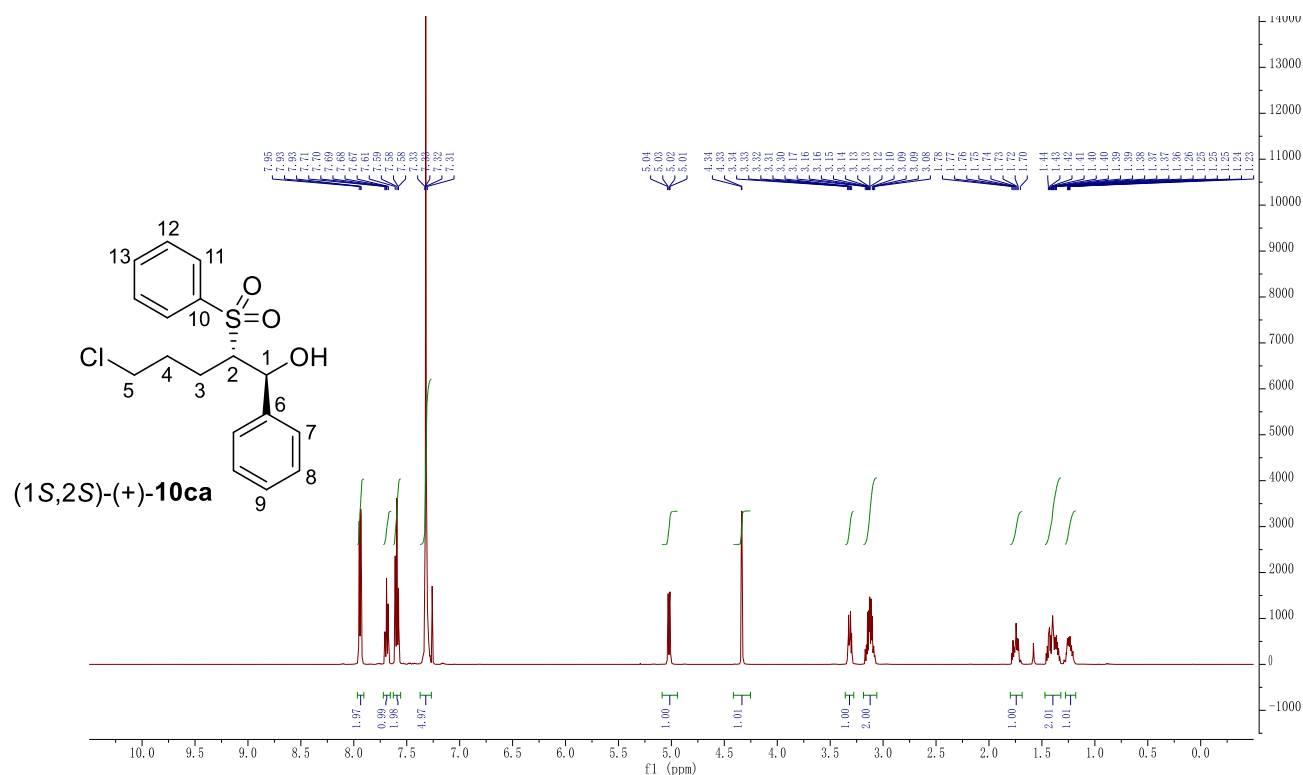(1*S*,2*S*)-(+)-**10ca**  $^{13}\text{C}$  NMR (126 MHz,  $\text{CDCl}_3$ )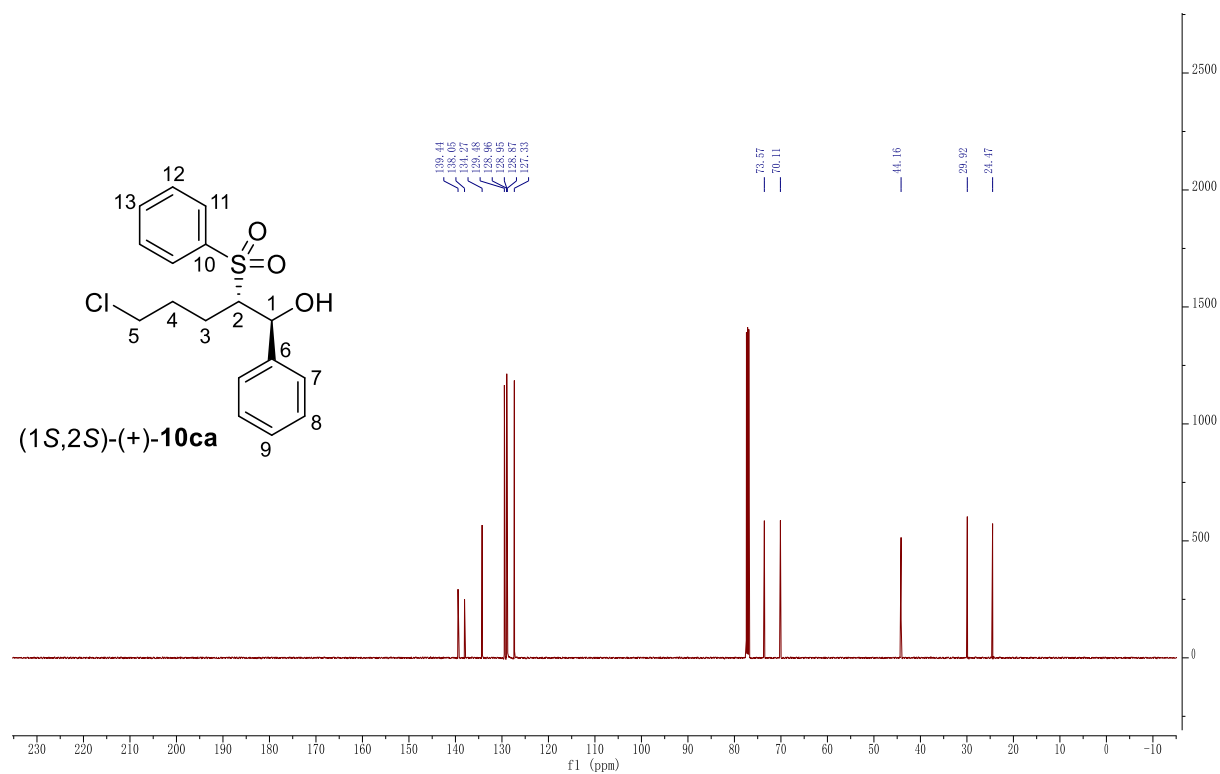

**(±)-10ca**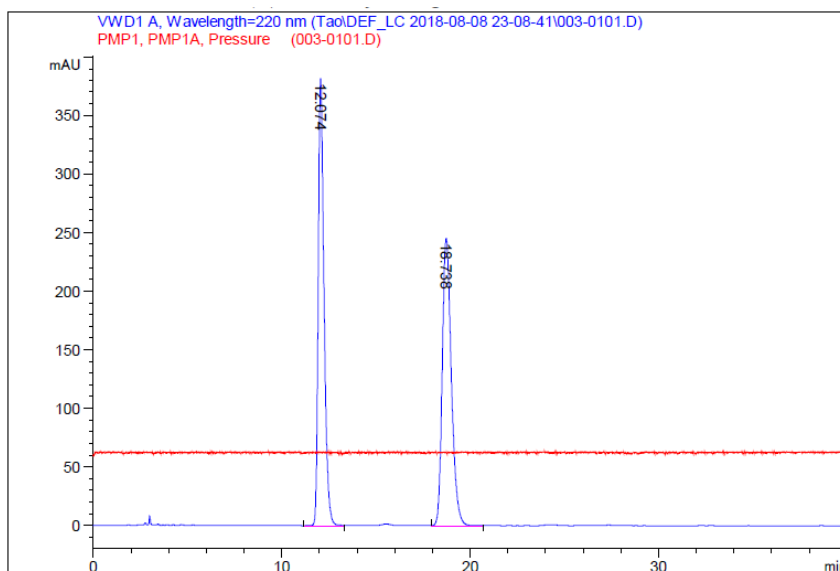

| Peak # | RetTime [min] | Type | Width [min] | Area [mAU*s] | Height [mAU] | Area %  |
|--------|---------------|------|-------------|--------------|--------------|---------|
| 1      | 12.074        | VV   | 0.3260      | 8181.15381   | 381.36618    | 49.8064 |
| 2      | 18.738        | VV   | 0.5140      | 8244.76563   | 245.59296    | 50.1936 |

**(1*S*,2*S*)-(+)-10ca**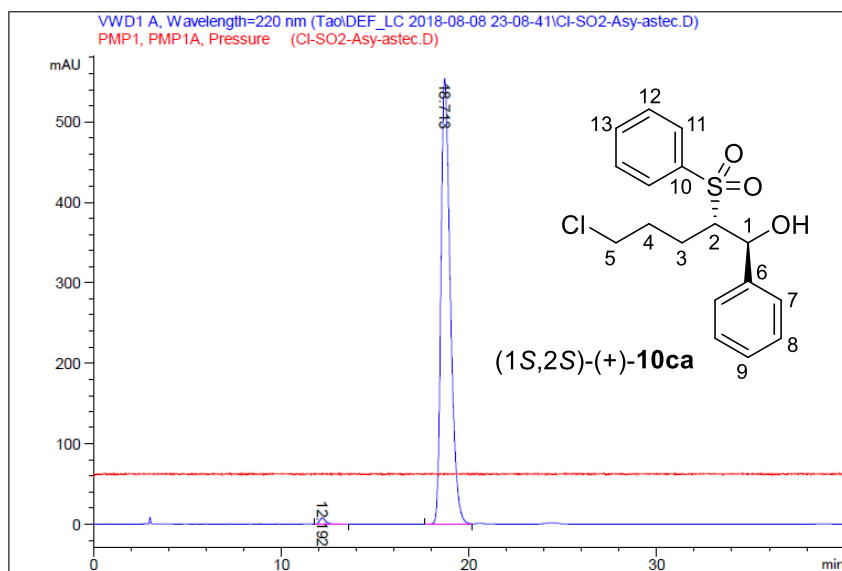

| Peak # | RetTime [min] | Type | Width [min] | Area [mAU*s] | Height [mAU] | Area %  |
|--------|---------------|------|-------------|--------------|--------------|---------|
| 1      | 12.192        | VV   | 0.3588      | 193.58862    | 8.14644      | 0.9961  |
| 2      | 18.713        | VV   | 0.5334      | 1.92406e4    | 553.92914    | 99.0039 |

[illegible]

**(1*S*,2*S*)-(+)-10da**

Chemical structure of (1*S*,2*S*)-(+)-10da is shown. The structure features a central chiral center (C1) bonded to a hydroxyl group (OH), a phenyl ring (C7-C10), a sulfonamide group (SO<sub>2</sub>NH<sub>2</sub>), and a 4-bromophenyl group (C11-C14). The carbons are numbered 1 through 14. The <sup>13</sup>C NMR spectrum (CDCl<sub>3</sub>) shows peaks at 130.59, 130.18, 129.45, 128.88, 128.46, 127.81, 127.30, 73.56, 70.44, 32.65, 32.11, 25.92, and 25.77 ppm.

**(±)-10da**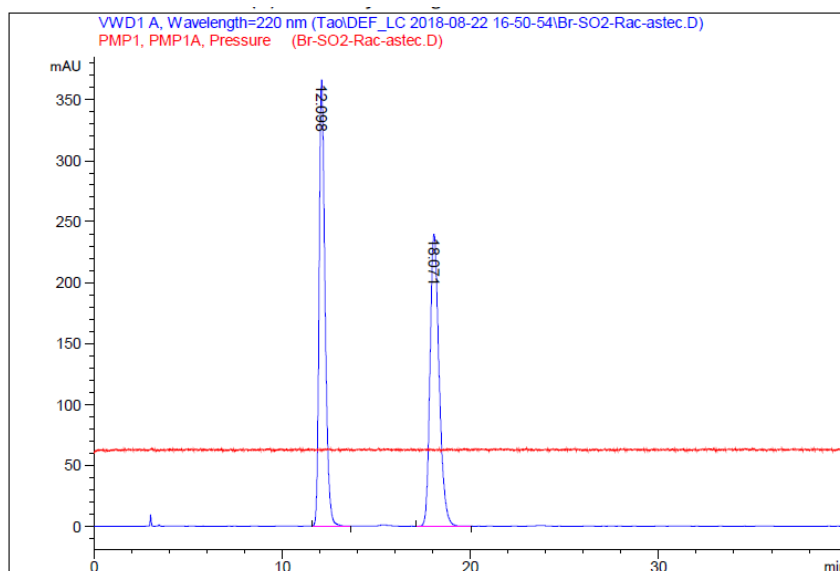

| Peak # | RetTime [min] | Type | Width [min] | Area [mAU*s] | Height [mAU] | Area %  |
|--------|---------------|------|-------------|--------------|--------------|---------|
| 1      | 12.098        | VV   | 0.3340      | 8101.03955   | 365.97867    | 50.0447 |
| 2      | 18.071        | VB   | 0.5219      | 8086.55176   | 239.56184    | 49.9553 |

**(1S,2S)-(+)-10da**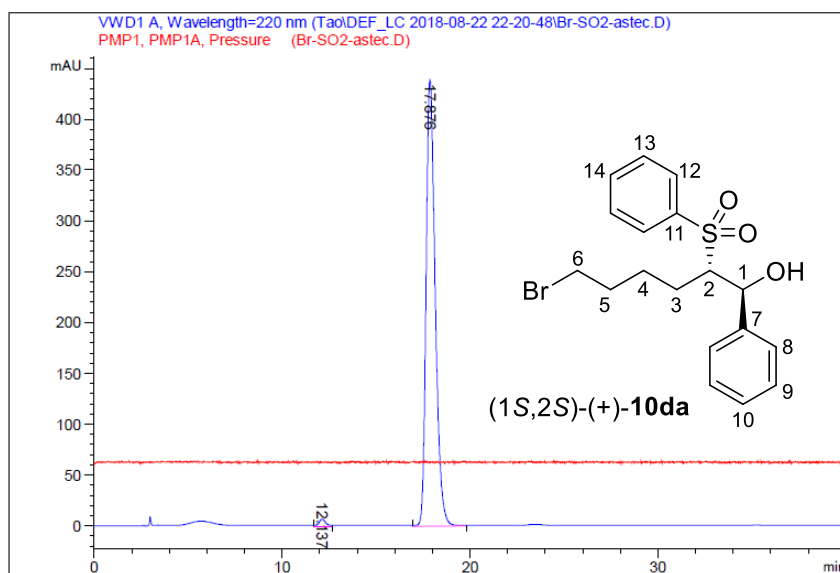

| Peak # | RetTime [min] | Type | Width [min] | Area [mAU*s] | Height [mAU] | Area %  |
|--------|---------------|------|-------------|--------------|--------------|---------|
| 1      | 12.137        | VV   | 0.3803      | 179.01158    | 6.99122      | 1.1941  |
| 2      | 17.876        | VV   | 0.5155      | 1.48117e4    | 439.45715    | 98.8059 |

$(1S,2S)$ -(-)-**7ea**  $^1\text{H}$  NMR (500 MHz,  $\text{CDCl}_3$ )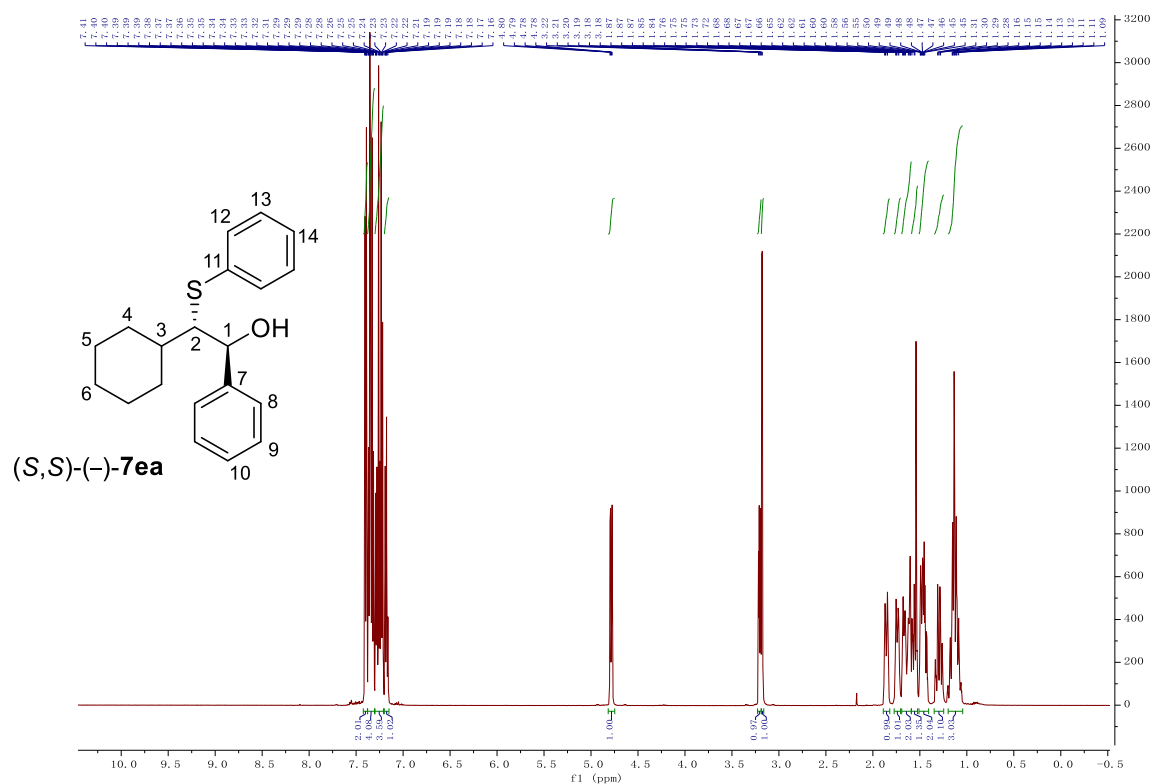 $(1S,2S)$ -(-)-**7ea**  $^{13}\text{C}$  NMR (126 MHz,  $\text{CDCl}_3$ )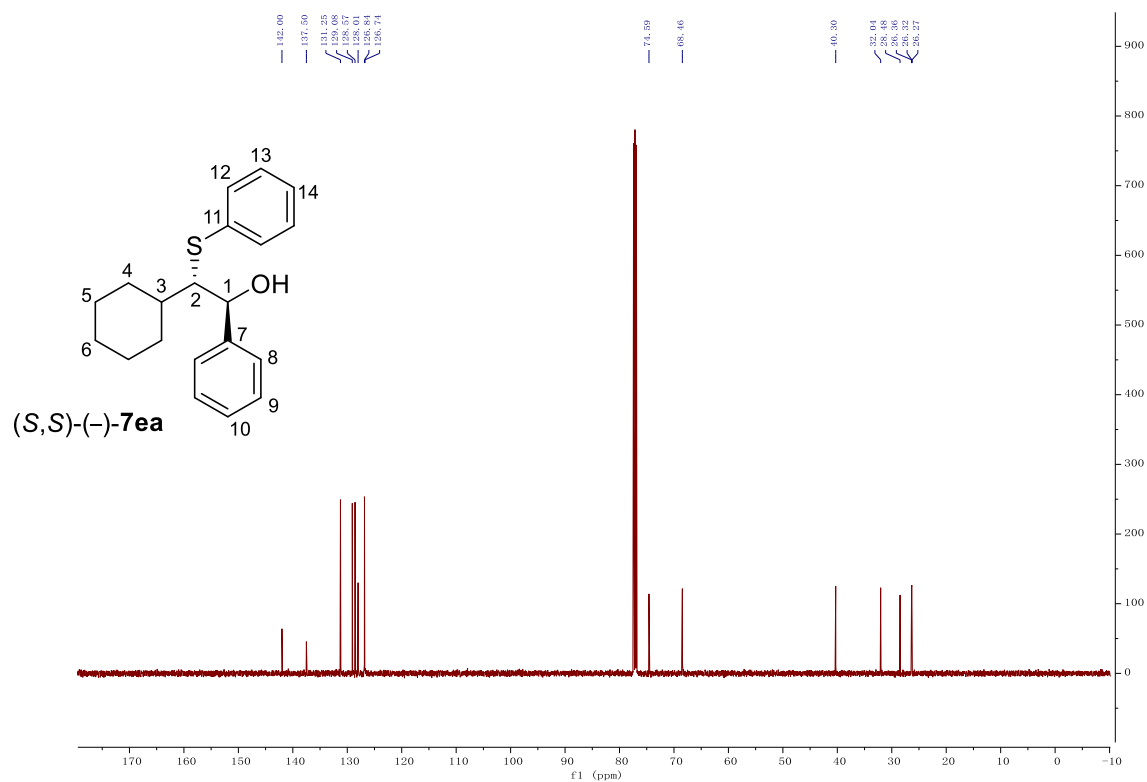

**(±)-7ea**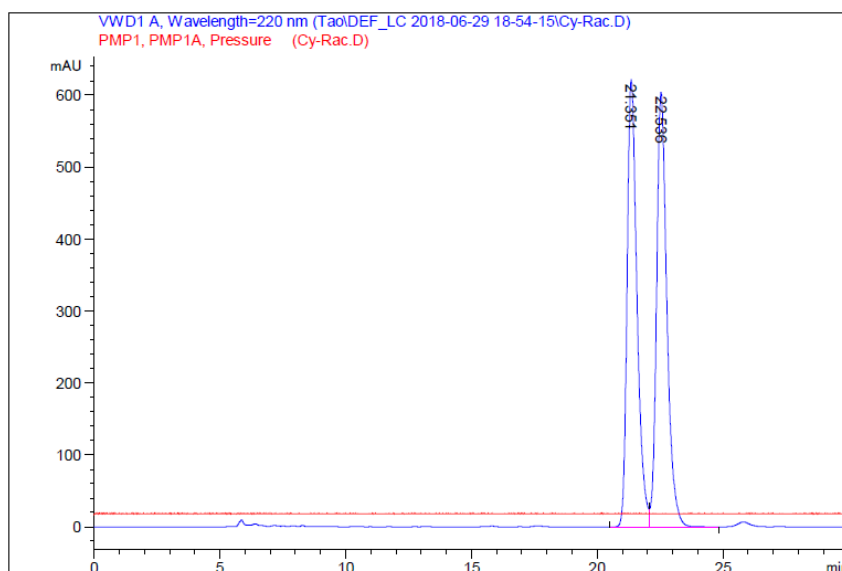

| Peak # | RetTime [min] | Type | Width [min] | Area [mAU*s] | Height [mAU] | Area %  |
|--------|---------------|------|-------------|--------------|--------------|---------|
| 1      | 21.351        | VV   | 0.4110      | 1.69325e4    | 621.57770    | 49.5430 |
| 2      | 22.536        | VB   | 0.4380      | 1.72449e4    | 603.93933    | 50.4570 |

**(1*S*,2*S*)-(-)-7ea**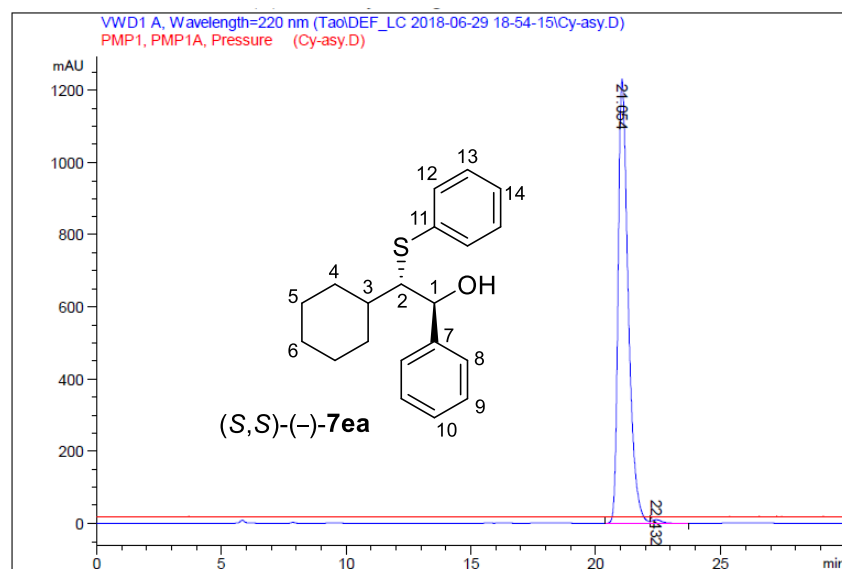

| Peak # | RetTime [min] | Type | Width [min] | Area [mAU*s] | Height [mAU] | Area %  |
|--------|---------------|------|-------------|--------------|--------------|---------|
| 1      | 21.054        | BV   | 0.4238      | 3.48666e4    | 1230.51086   | 99.1498 |
| 2      | 22.432        | VV   | 0.4345      | 298.98199    | 10.04859     | 0.8502  |

**(-)-7fa**  $^1\text{H}$  NMR (500 MHz,  $\text{CDCl}_3$ )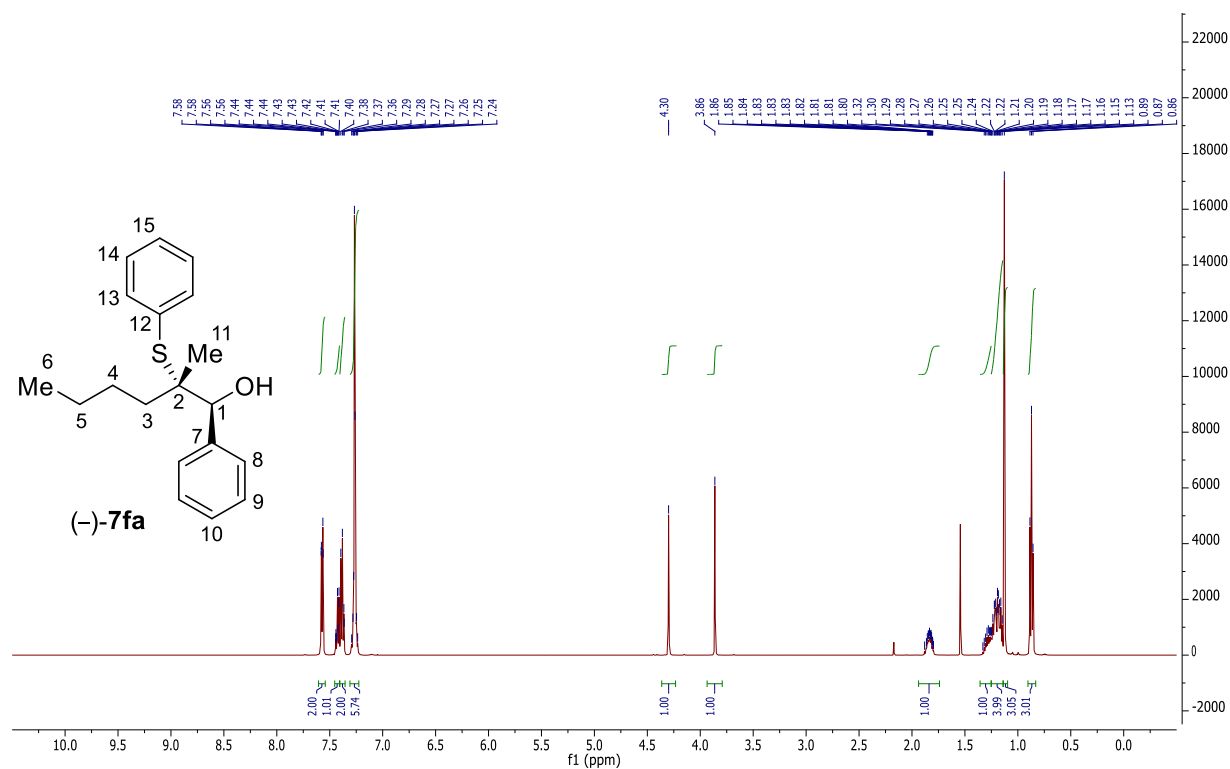**(-)-7fa**  $^{13}\text{C}$  NMR (126 MHz,  $\text{CDCl}_3$ )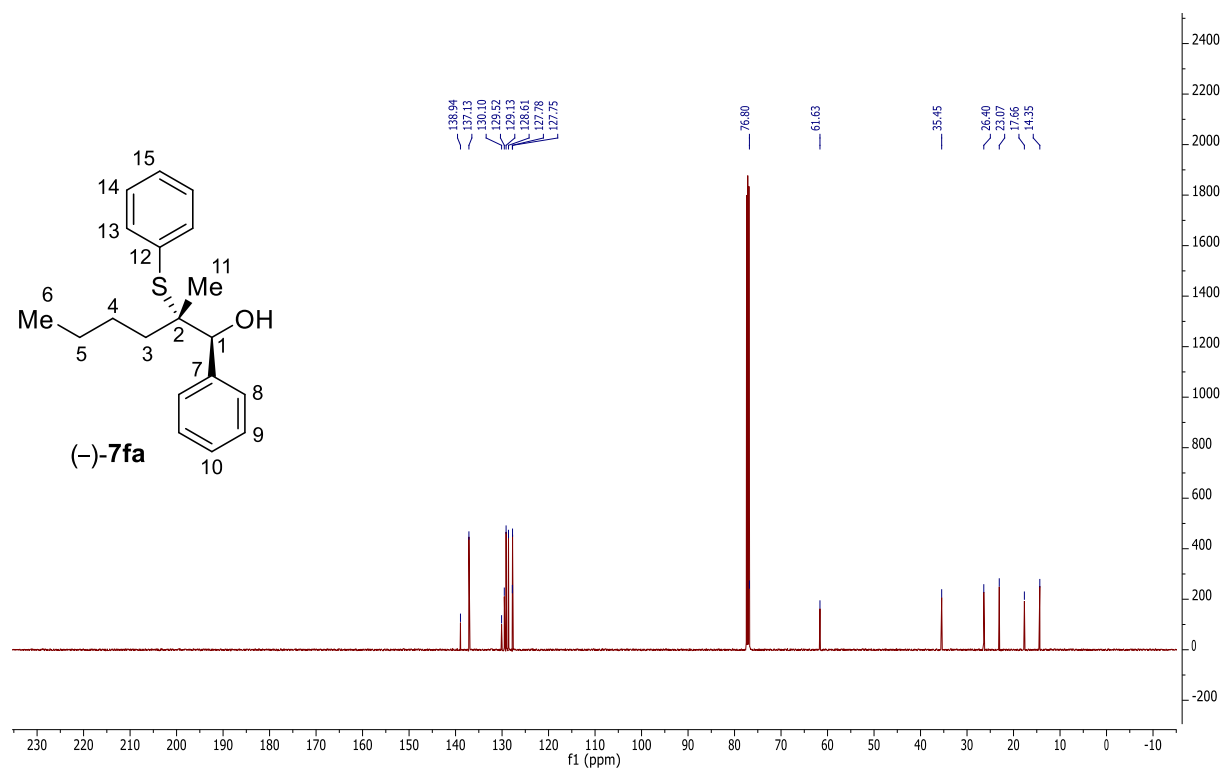

**(±)-7fa**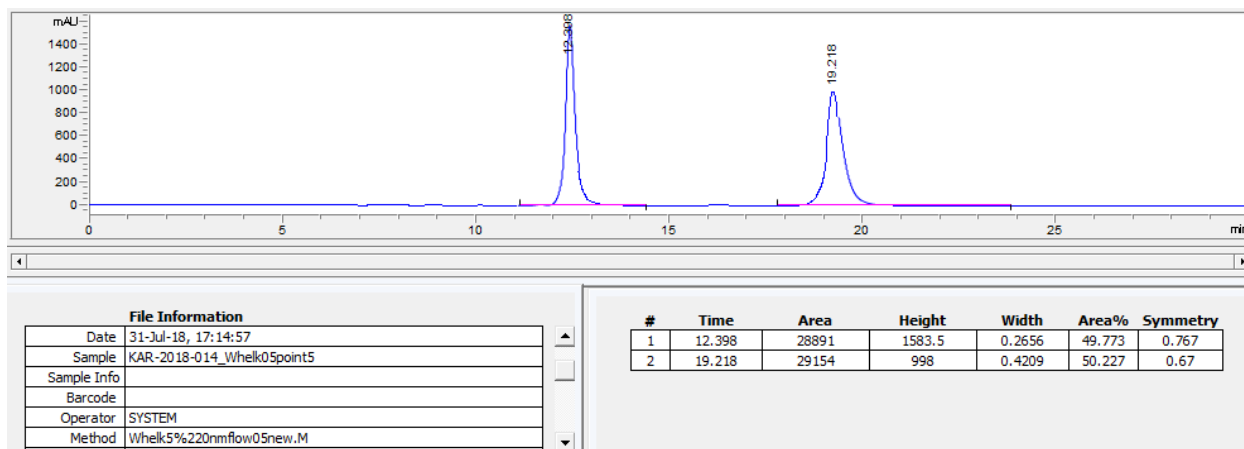**(-)-7fa**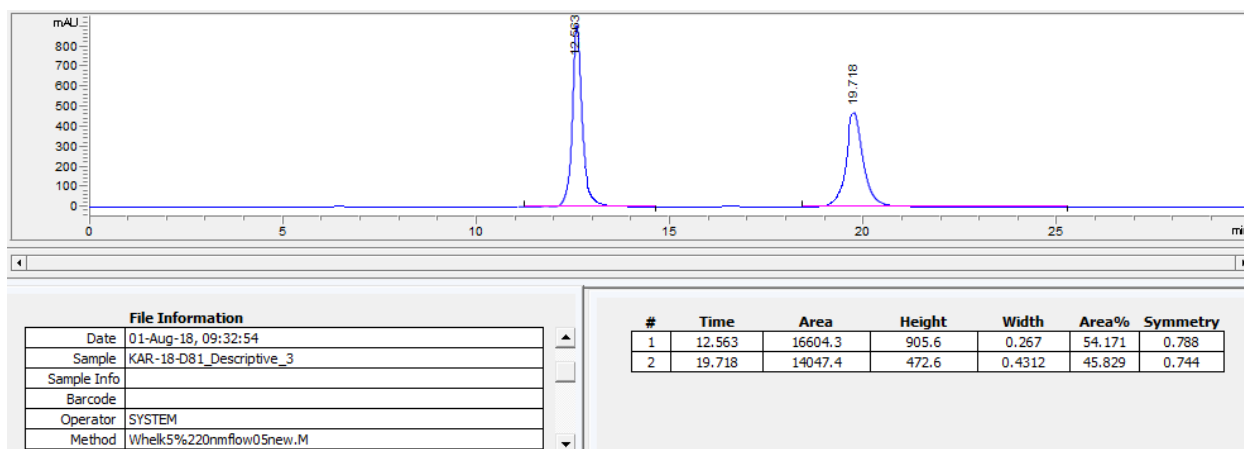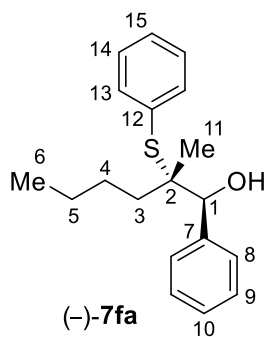

(2*S*,3*S*)-(+)-**7ga**  $^1\text{H}$  NMR (500 MHz,  $\text{CDCl}_3$ )

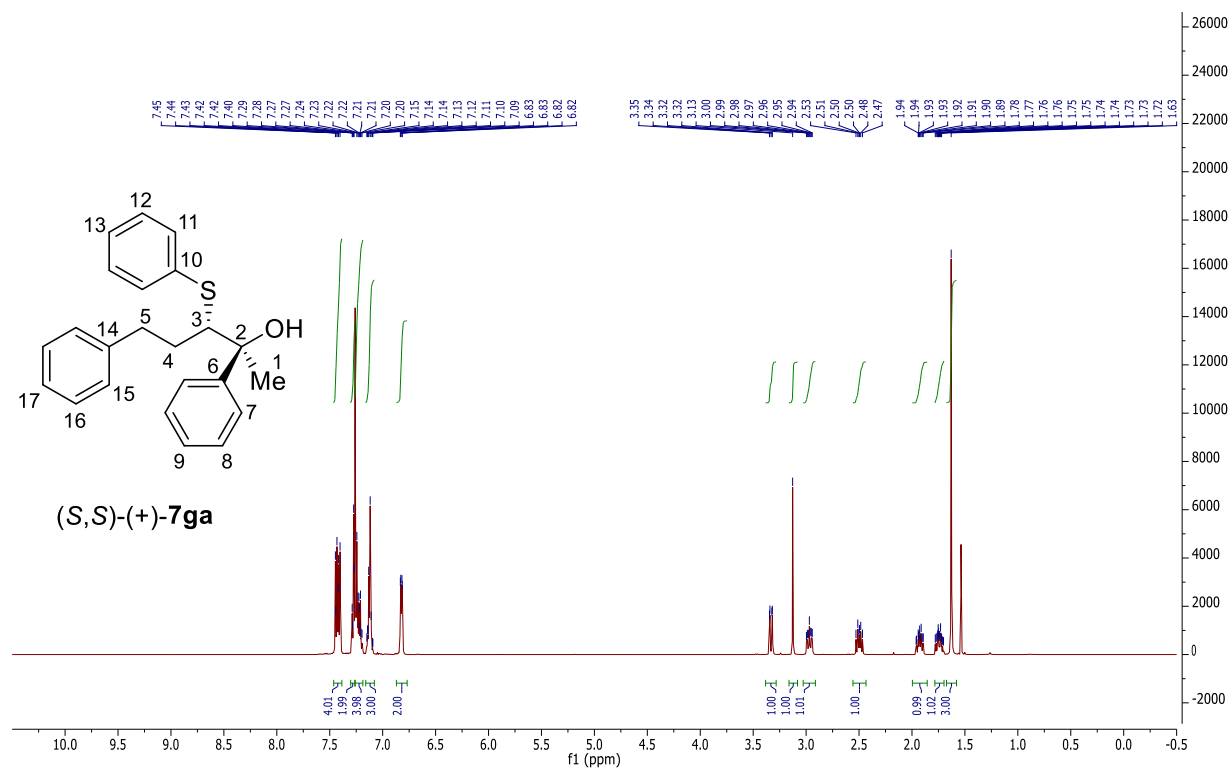

(2*S*,3*S*)-(+)-**7ga**  $^{13}\text{C}$  NMR (126 MHz,  $\text{CDCl}_3$ )

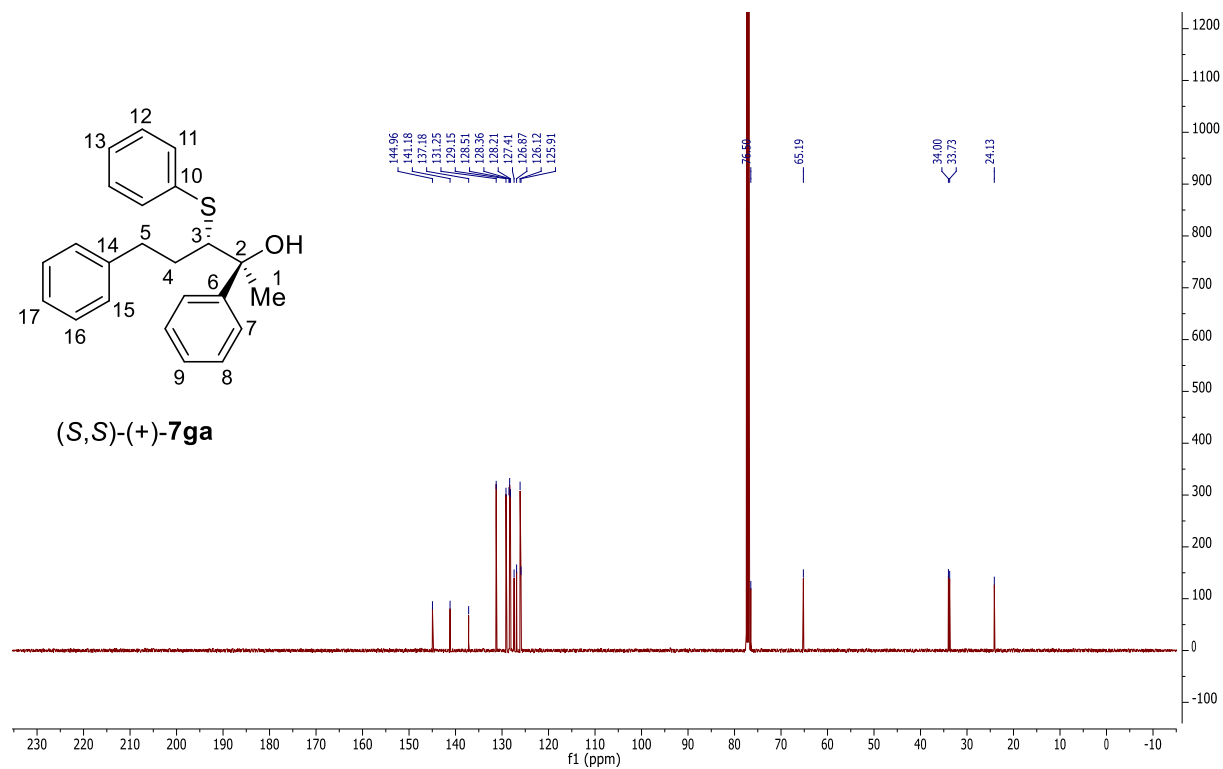

**(±)-7ga**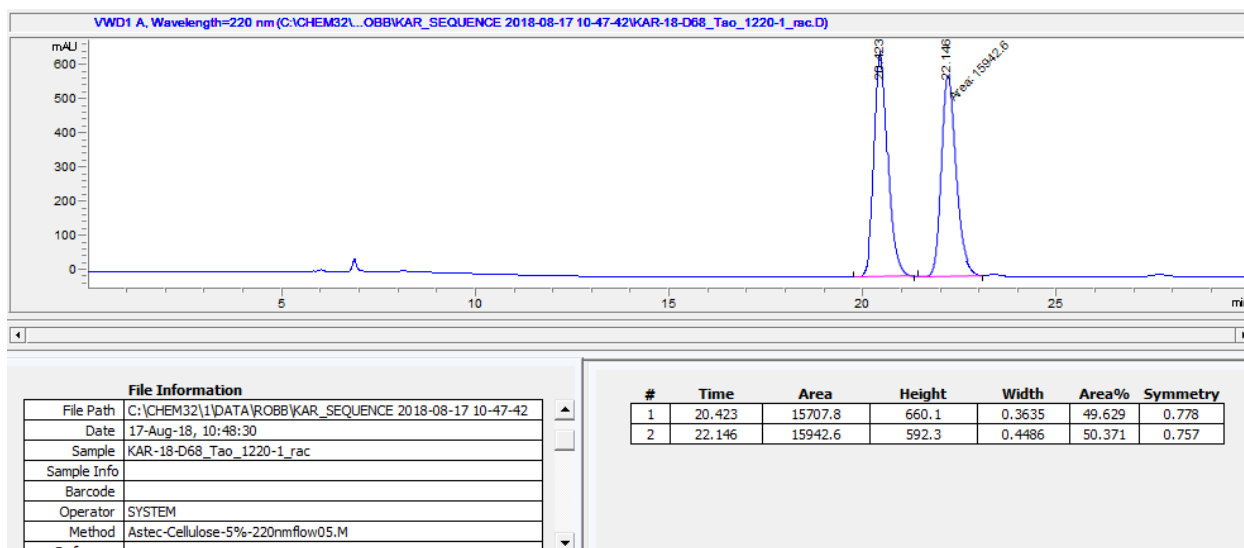**(2*S*,3*S*)-(+)-7ga**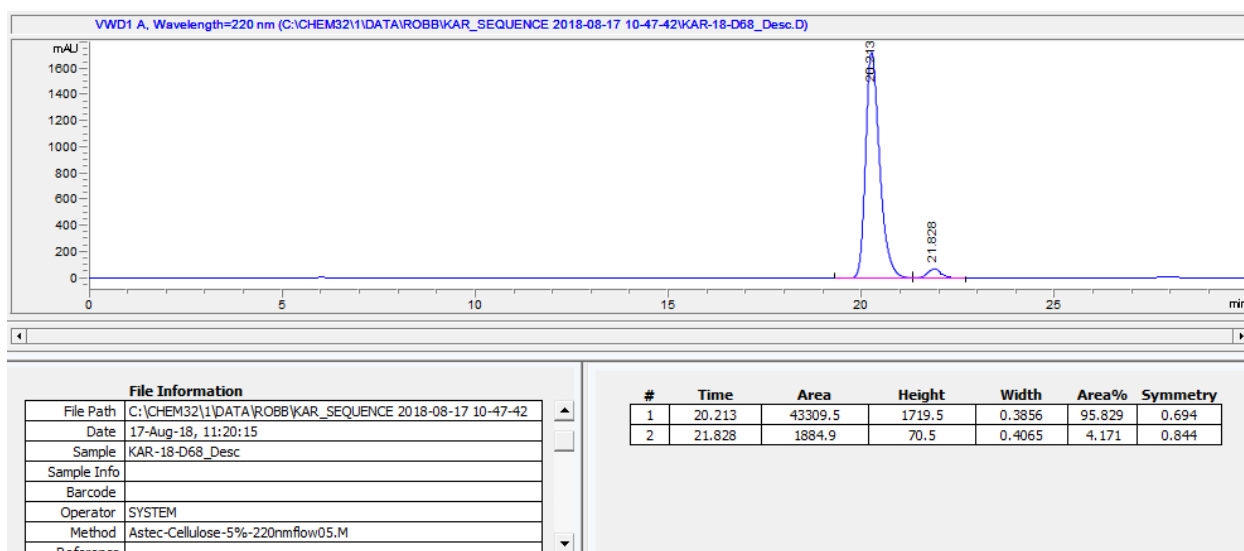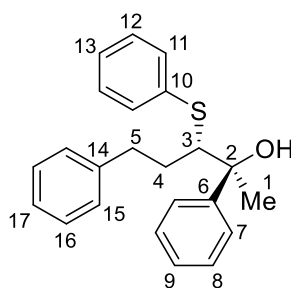**(*S,S*)-(+)-7ga**

**(S)-(-)-7ha**  $^1\text{H}$  NMR (500 MHz,  $\text{CDCl}_3$ )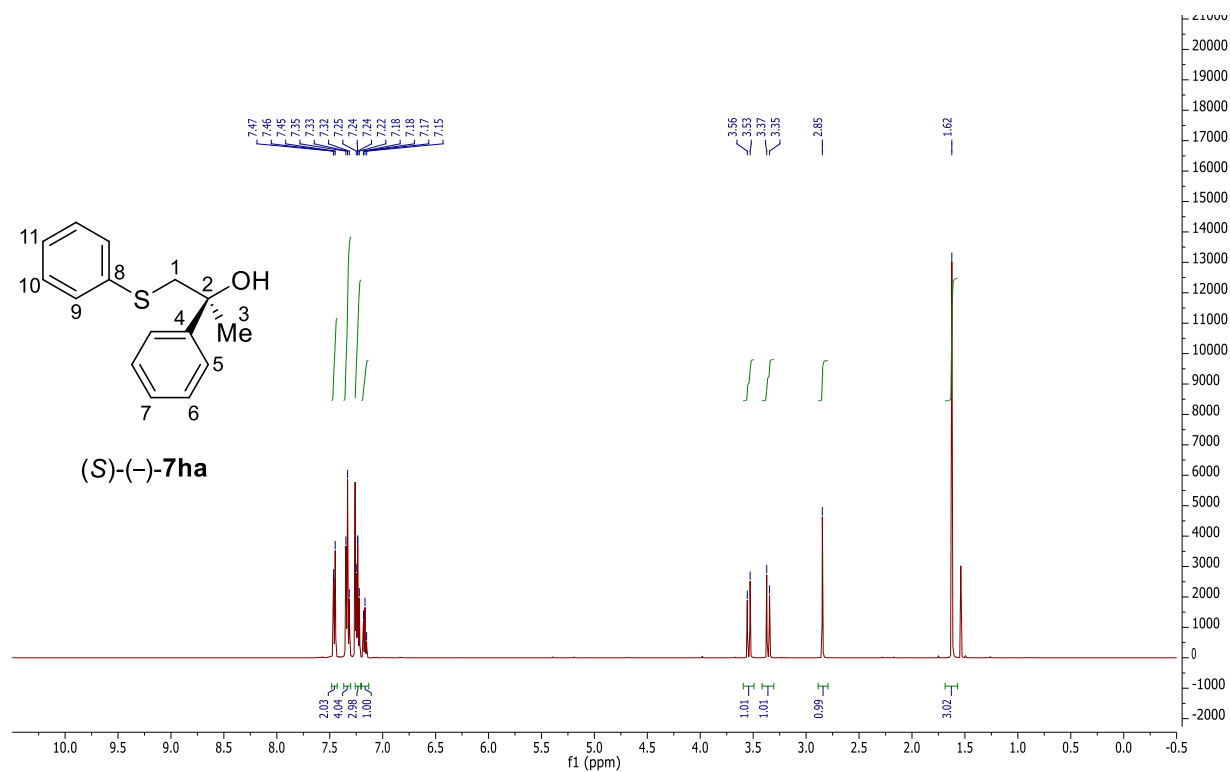**(S)-(-)-7ha**  $^{13}\text{C}$  NMR (126 MHz,  $\text{CDCl}_3$ )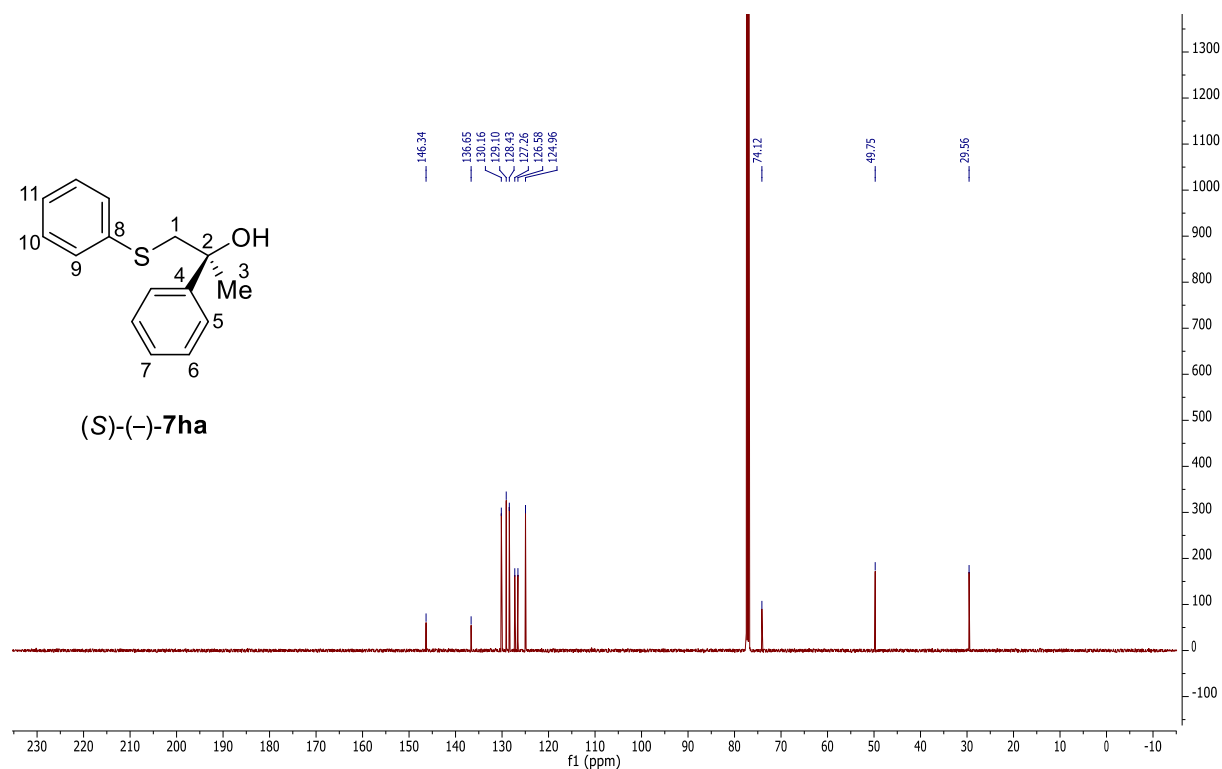

**(±)-7ha**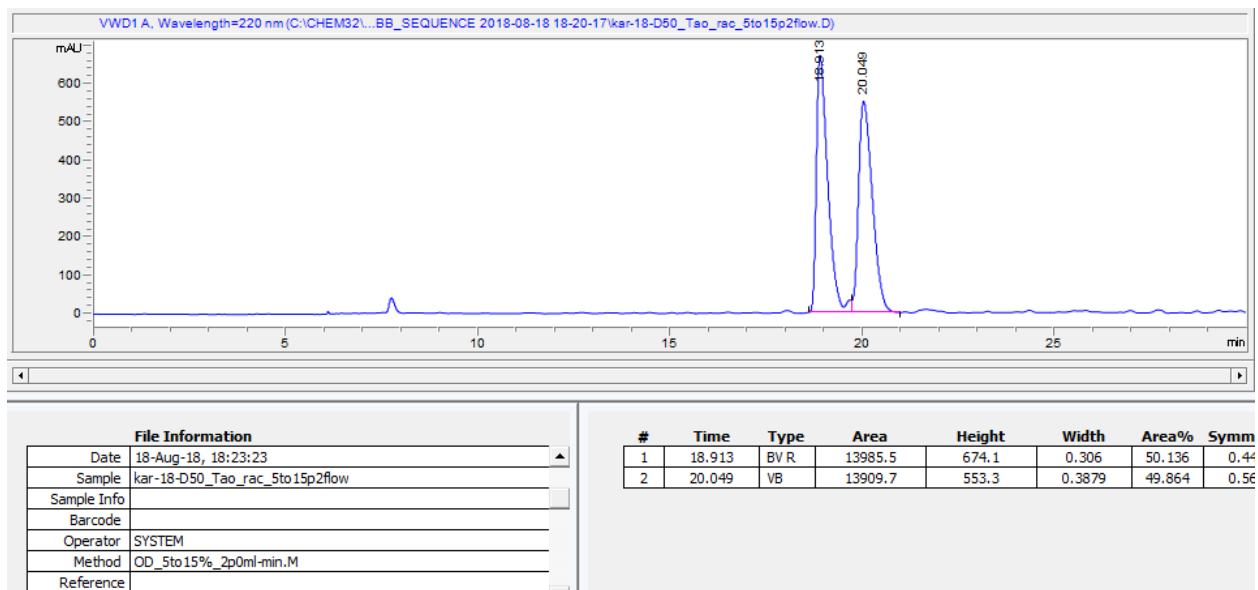**(-)-7ha**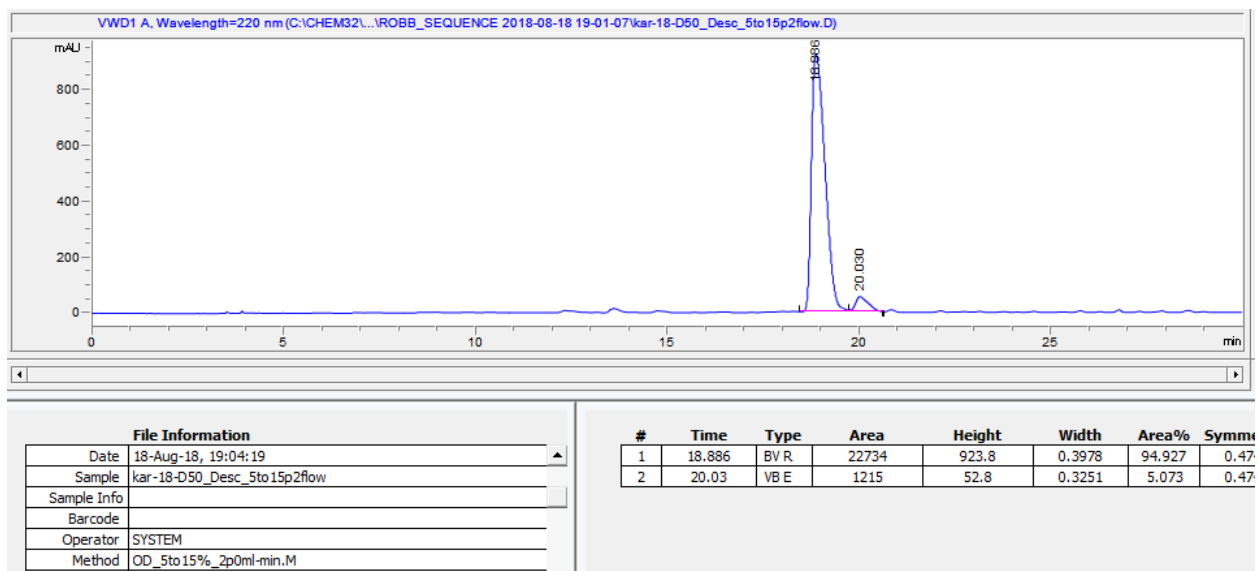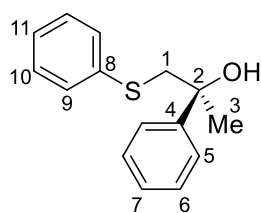**(S)-(-)-7ha**

**(S)-(-)-7ia**  $^1\text{H}$  NMR (500 MHz,  $\text{CDCl}_3$ )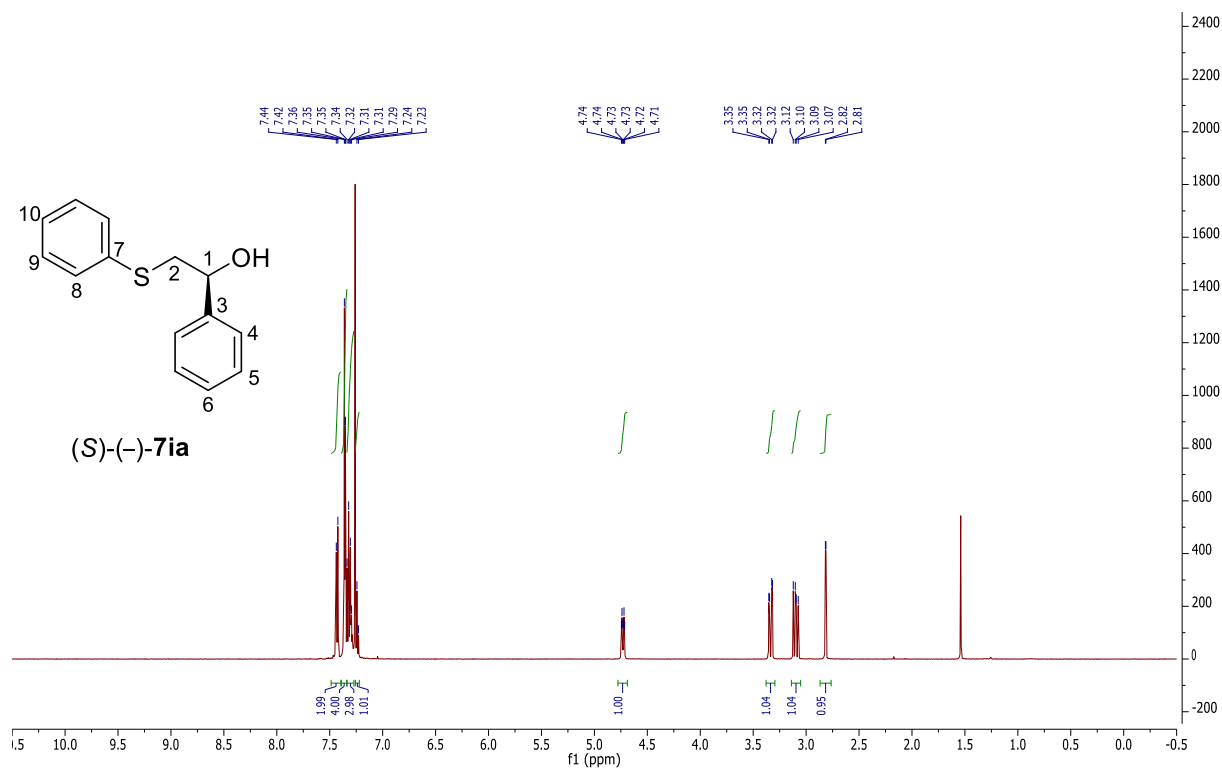**(S)-(-)-7ia**  $^{13}\text{C}$  NMR (126 MHz,  $\text{CDCl}_3$ )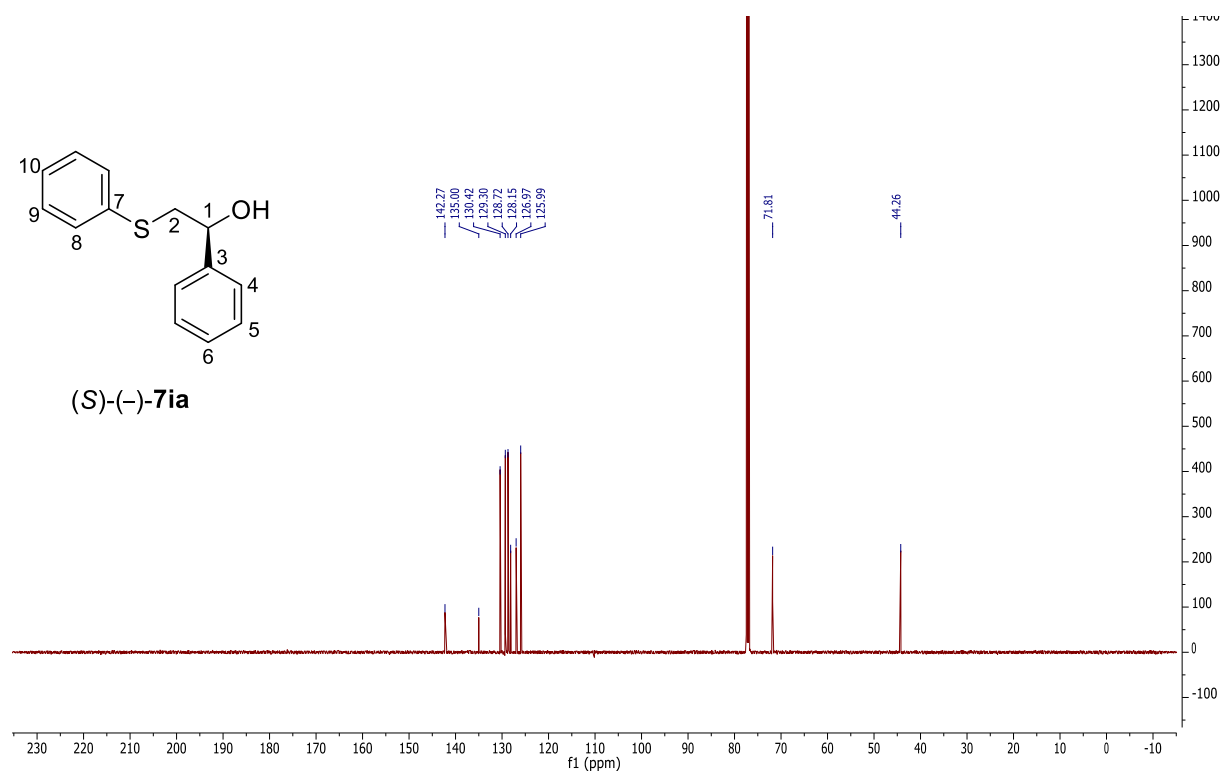

**(±)-7ia**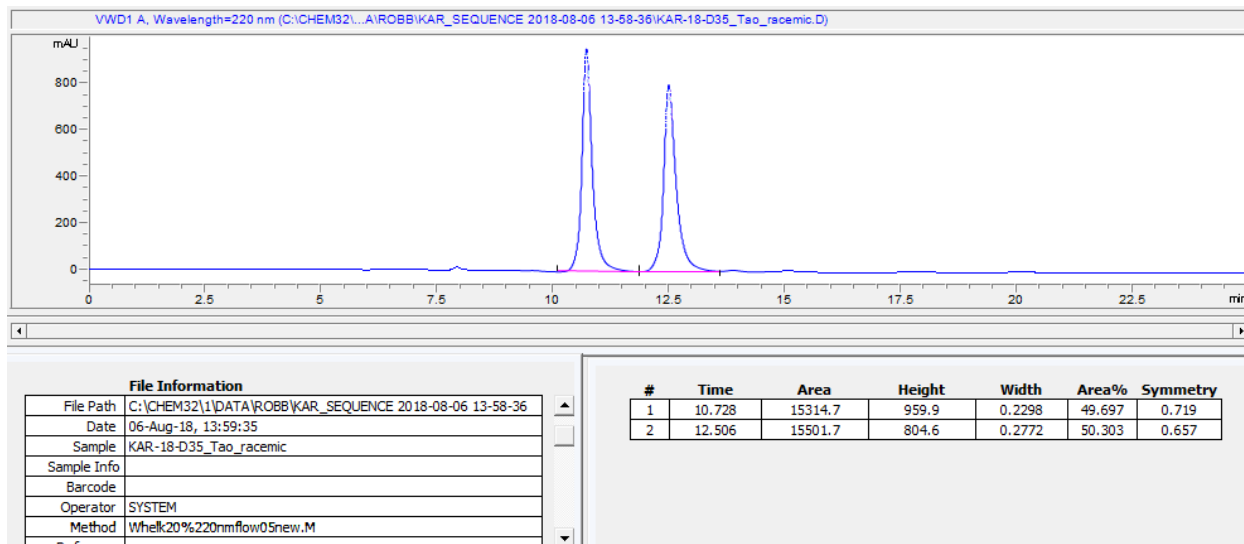**(-)-7ia**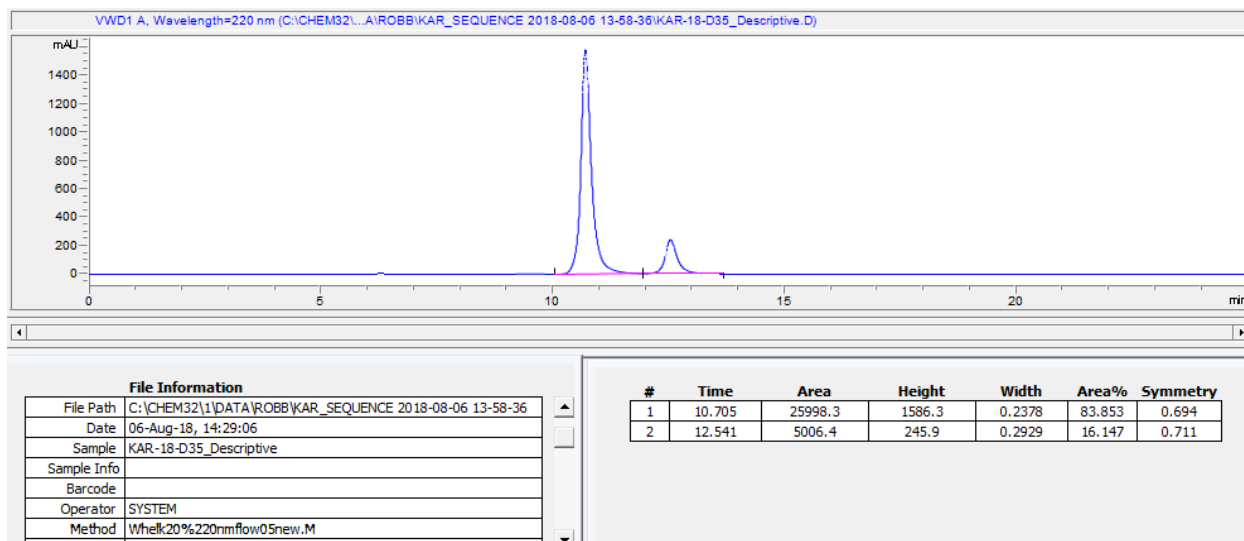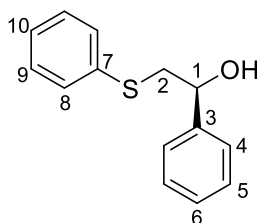**(S)-(-)-7ia**

**(1*R*,2*S*)-(+)-7ja**  $^1\text{H}$  NMR (500 MHz,  $\text{CDCl}_3$ )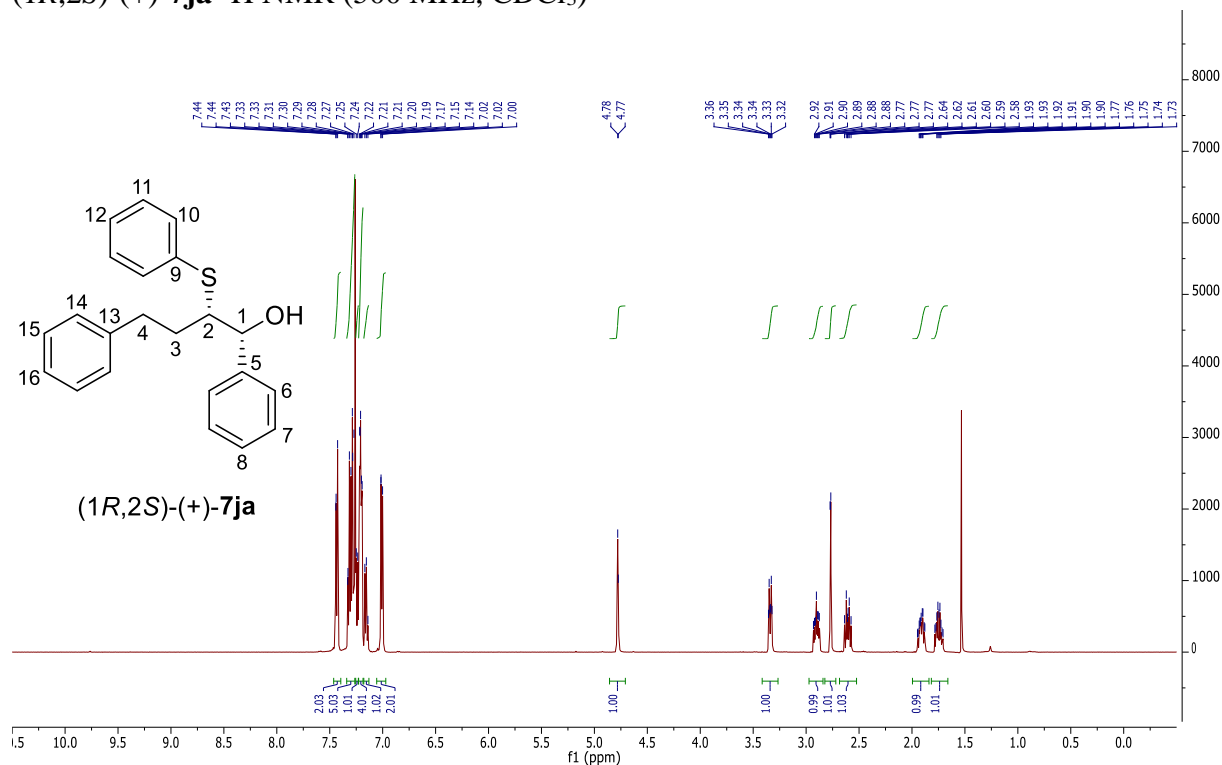**(1*R*,2*S*)-(+)-7ja**  $^{13}\text{C}$  NMR (126 MHz,  $\text{CDCl}_3$ )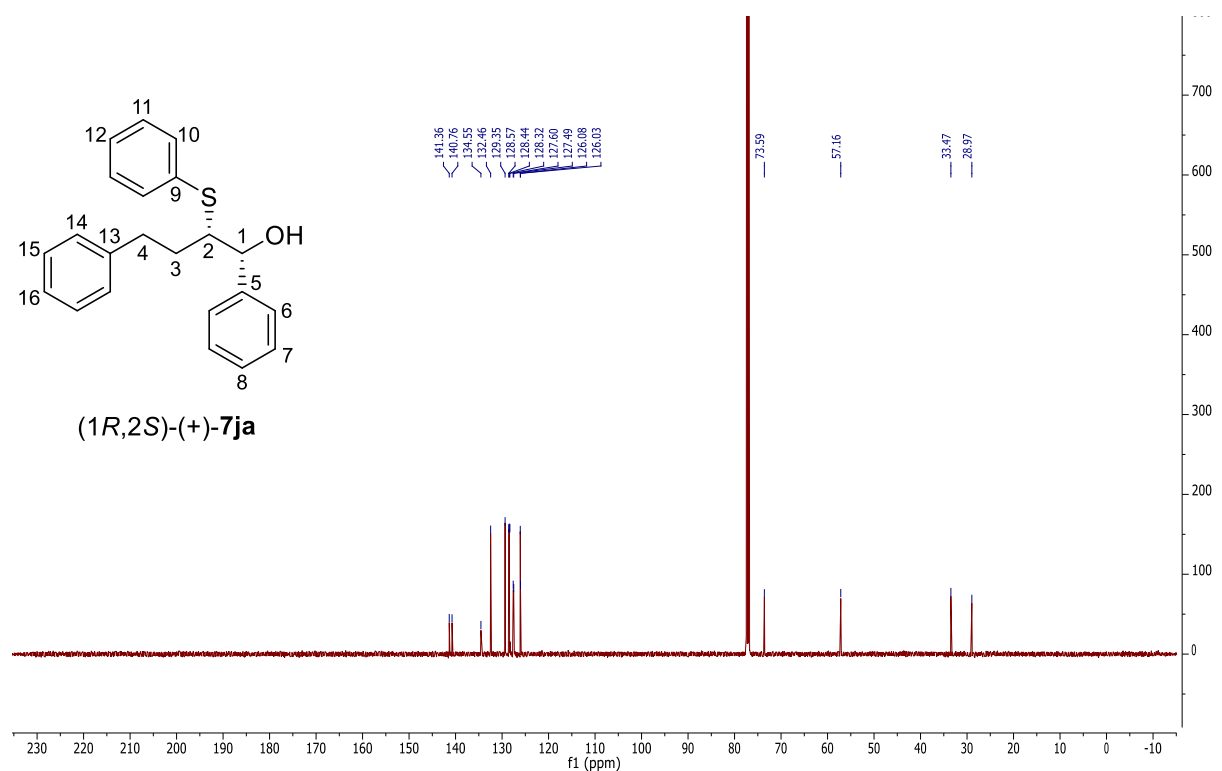

**(±)-7ja**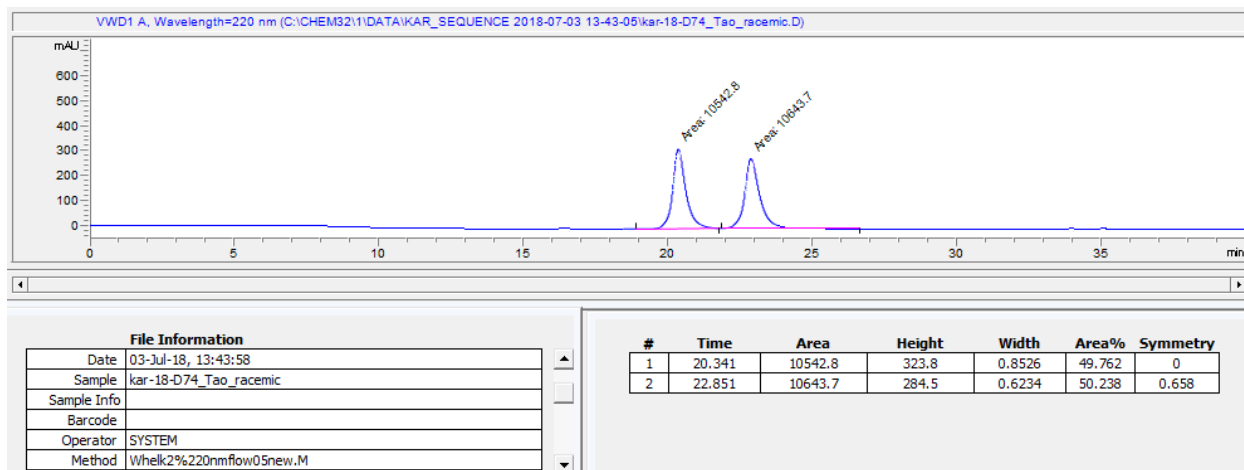**(1R,2S)-(+)-7ja**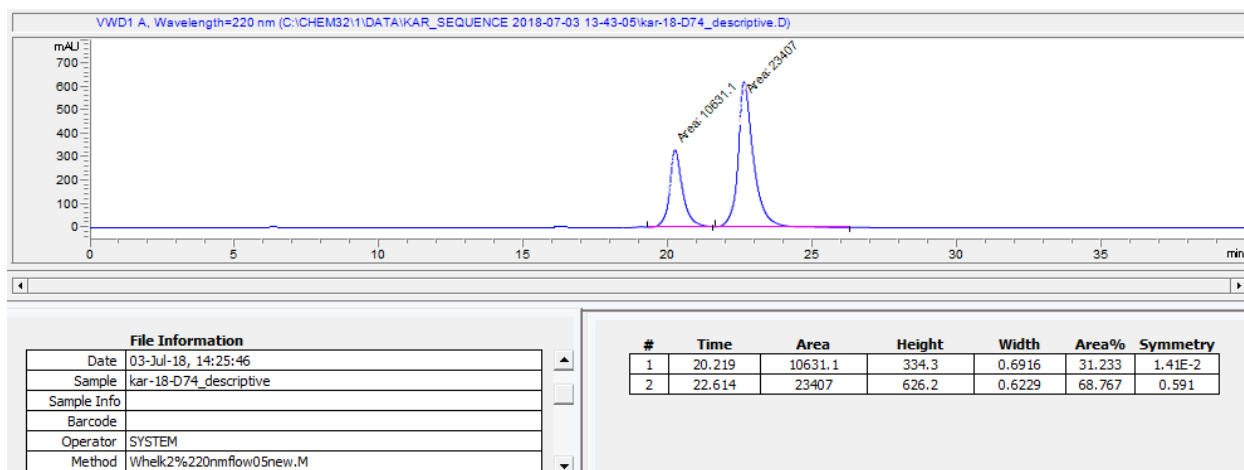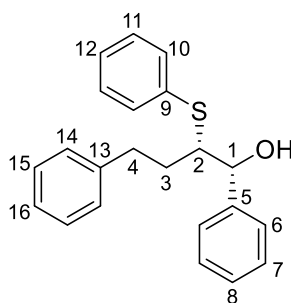**(1R,2S)-(+)-7ja**

**4b**  $^1\text{H}$  NMR (500 MHz,  $\text{CDCl}_3$ )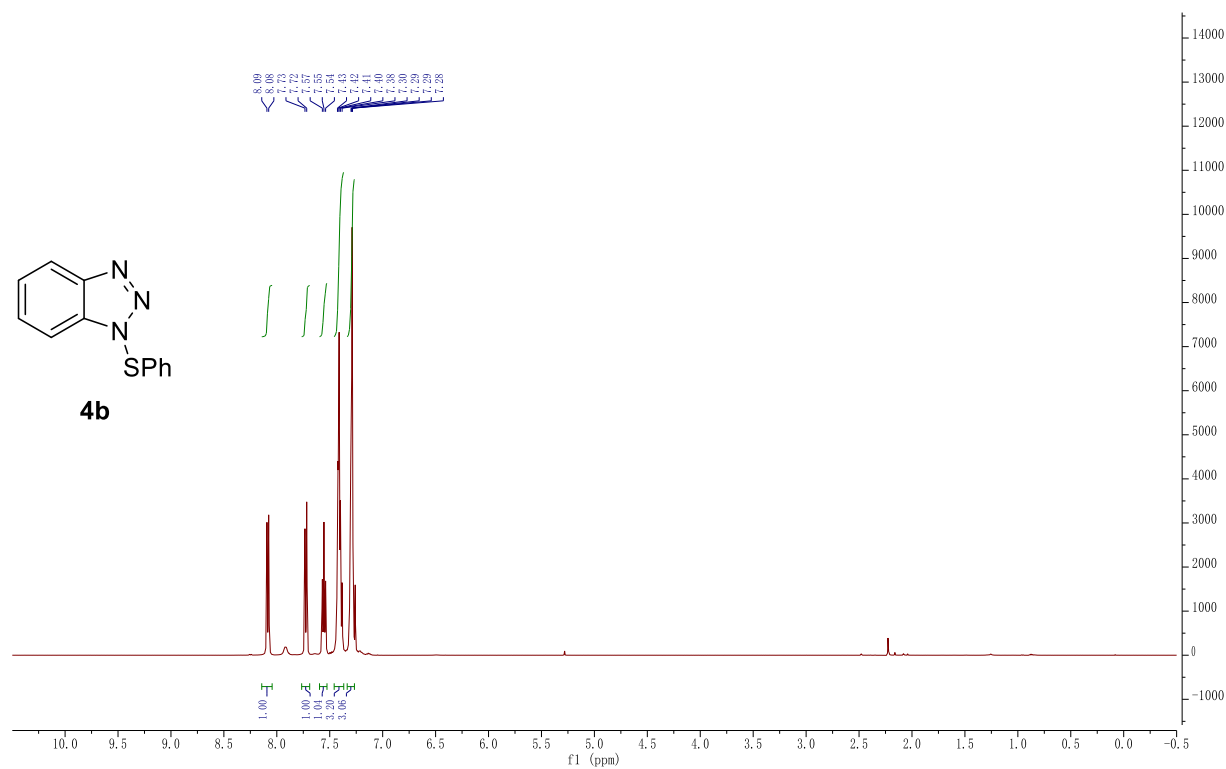**4b**  $^{13}\text{C}$  NMR (126 MHz,  $\text{CDCl}_3$ )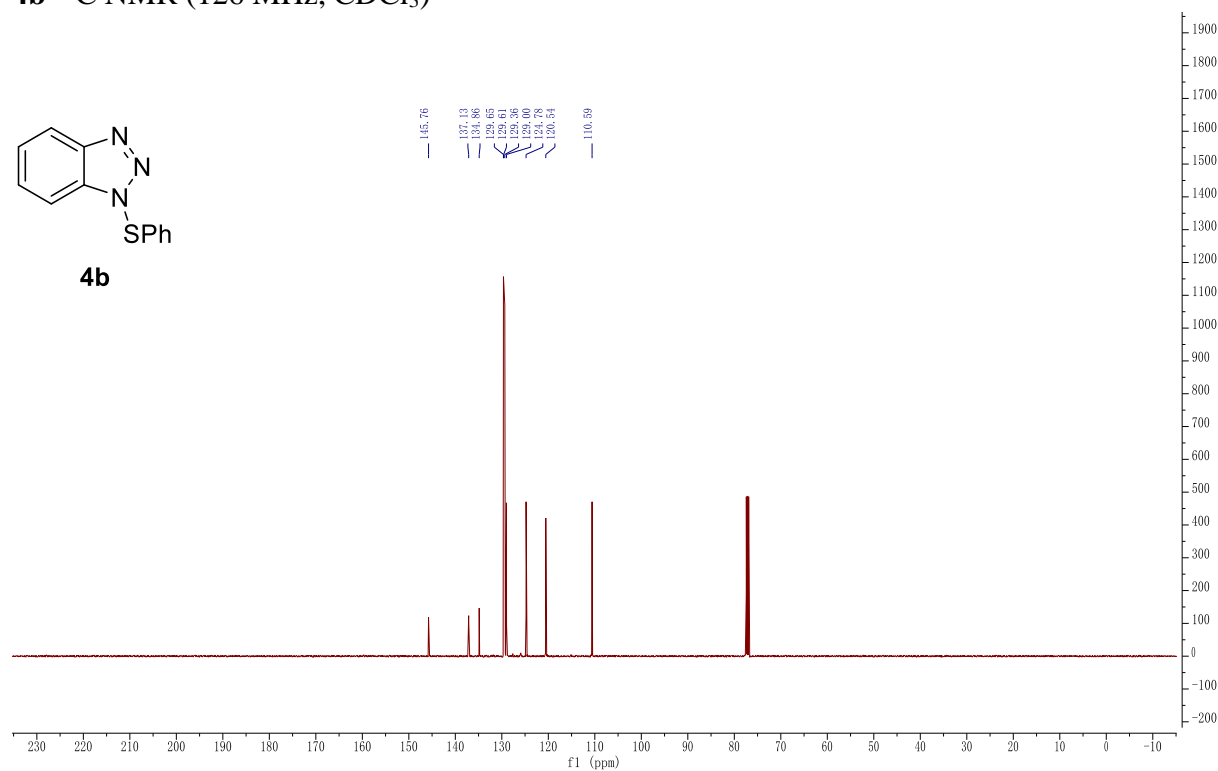

Chemical structure of (1S,2S)-(-)-6aa is shown. The structure is a 1-phenyl-2-((S)-phenylbutyl)-2-(4,4,4-trimethyl-1,3-dioxol-2-yl)ethanol derivative.

<sup>1</sup>H NMR spectrum (CDCl<sub>3</sub>) of (1S,2S)-(-)-6aa. The spectrum shows peaks from 0 to 8 ppm, with integration values and peak lists provided.

Integration values (from left to right): 2.10, 2.15, 0.82, 1.00, 2.10, 1.00, 2.00, 0.98, 1.17, 0.10, 0.32.

Peak lists (from left to right): 7.45, 7.37, 7.35, 7.34, 7.31, 7.29, 7.27, 7.25, 7.23, 7.21, 7.19, 7.18, 7.16, 7.13, 7.10, 6.92, 3.61, 3.59, 3.58, 3.57, 3.56, 3.55, 3.54, 3.53, 3.52, 3.51, 3.50, 3.49, 3.48, 3.47, 3.46, 3.45, 3.44, 3.43, 3.42, 3.41, 3.40, 3.39, 3.38, 3.37, 3.36, 3.35, 3.34, 3.33, 3.32, 3.31, 3.30, 3.29, 3.28, 3.27, 3.26, 3.25, 3.24, 3.23, 3.22, 3.21, 3.20, 3.19, 3.18, 3.17, 3.16, 3.15, 3.14, 3.13, 3.12, 3.11, 3.10, 3.09, 3.08, 3.07, 3.06, 3.05, 3.04, 3.03, 3.02, 3.01, 3.00, 2.99, 2.98, 2.97, 2.96, 2.95, 2.94, 2.93, 2.92, 2.91, 2.90, 2.89, 2.88, 2.87, 2.86, 2.85, 2.84, 2.83, 2.82, 2.81, 2.80, 2.79, 2.78, 2.77, 2.76, 2.75, 2.74, 2.73, 2.72, 2.71, 2.70, 2.69, 2.68, 2.67, 2.66, 2.65, 2.64, 2.63, 2.62, 2.61, 2.60, 2.59, 2.58, 2.57, 2.56, 2.55, 2.54, 2.53, 2.52, 2.51, 2.50, 2.49, 2.48, 2.47, 2.46, 2.45, 2.44, 2.43, 2.42, 2.41, 2.40, 2.39, 2.38, 2.37, 2.36, 2.35, 2.34, 2.33, 2.32, 2.31, 2.30, 2.29, 2.28, 2.27, 2.26, 2.25, 2.24, 2.23, 2.22, 2.21, 2.20, 2.19, 2.18, 2.17, 2.16, 2.15, 2.14, 2.13, 2.12, 2.11, 2.10, 2.09, 2.08, 2.07, 2.06, 2.05, 2.04, 2.03, 2.02, 2.01, 2.00, 1.99, 1.98, 1.97, 1.96, 1.95, 1.94, 1.93, 1.92, 1.91, 1.90, 1.89, 1.88, 1.87, 1.86, 1.85, 1.84, 1.83, 1.82, 1.81, 1.80, 1.79, 1.78, 1.77, 1.76, 1.75, 1.74, 1.73, 1.72, 1.71, 1.70, 1.69, 1.68, 1.67, 1.66, 1.65, 1.64, 1.63, 1.62, 1.61, 1.60, 1.59, 1.58, 1.57, 1.56, 1.55, 1.54, 1.53, 1.52, 1.51, 1.50, 1.49, 1.48, 1.47, 1.46, 1.45, 1.44, 1.43, 1.42, 1.41, 1.40, 1.39, 1.38, 1.37, 1.36, 1.35, 1.34, 1.33, 1.32, 1.31, 1.30, 1.29, 1.28, 1.27, 1.26, 1.25, 1.24, 1.23, 1.22, 1.21, 1.20, 1.19, 1.18, 1.17, 1.16, 1.15, 1.14, 1.13, 1.12, 1.11, 1.10, 1.09, 1.08, 1.07, 1.06, 1.05, 1.04, 1.03, 1.02, 1.01, 1.00, 0.99, 0.98, 0.97, 0.96, 0.95, 0.94, 0.93, 0.92, 0.91, 0.90, 0.89, 0.88, 0.87, 0.86, 0.85, 0.84, 0.83, 0.82, 0.81, 0.80, 0.79, 0.78, 0.77, 0.76, 0.75, 0.74, 0.73, 0.72, 0.71, 0.70, 0.69, 0.68, 0.67, 0.66, 0.65, 0.64, 0.63, 0.62, 0.61, 0.60, 0.59, 0.58, 0.57, 0.56, 0.55, 0.54, 0.53, 0.52, 0.51, 0.50, 0.49, 0.48, 0.47, 0.46, 0.45, 0.44, 0.43, 0.42, 0.41, 0.40, 0.39, 0.38, 0.37, 0.36, 0.35, 0.34, 0.33, 0.32, 0.31, 0.30, 0.29, 0.28, 0.27, 0.26, 0.25, 0.24, 0.23, 0.22, 0.21, 0.20, 0.19, 0.18, 0.17, 0.16, 0.15, 0.14, 0.13, 0.12, 0.11, 0.10, 0.09, 0.08, 0.07, 0.06, 0.05, 0.04, 0.03, 0.02, 0.01, 0.00.

Chemical structure of (1S,2S)-(-)-6aa is shown as an inset. The structure is a chiral boronate ester derivative, featuring a central boron atom bonded to a phenyl group (Ph), a chiral auxiliary (a 1,3-dioxolane ring), and a chiral auxiliary (a 1,3-dioxolane ring). The chiral auxiliary is a 1,3-dioxolane ring with a phenyl group (Ph) and a chiral auxiliary (a 1,3-dioxolane ring).

**(1S,2S)-(-)-6aa**

<sup>13</sup>C NMR spectrum (CDCl<sub>3</sub>) showing peaks (ppm): 142.12, 140.06, 135.06, 133.50, 132.91, 128.54, 128.49, 128.29, 127.34, 126.62, 125.66, 83.80, 51.57, 39.14, 34.70, 32.18, 24.95, 24.55.

(1*S*,2*S*)-(-)-**6ai** <sup>1</sup>H NMR (500 MHz, CDCl<sub>3</sub>)

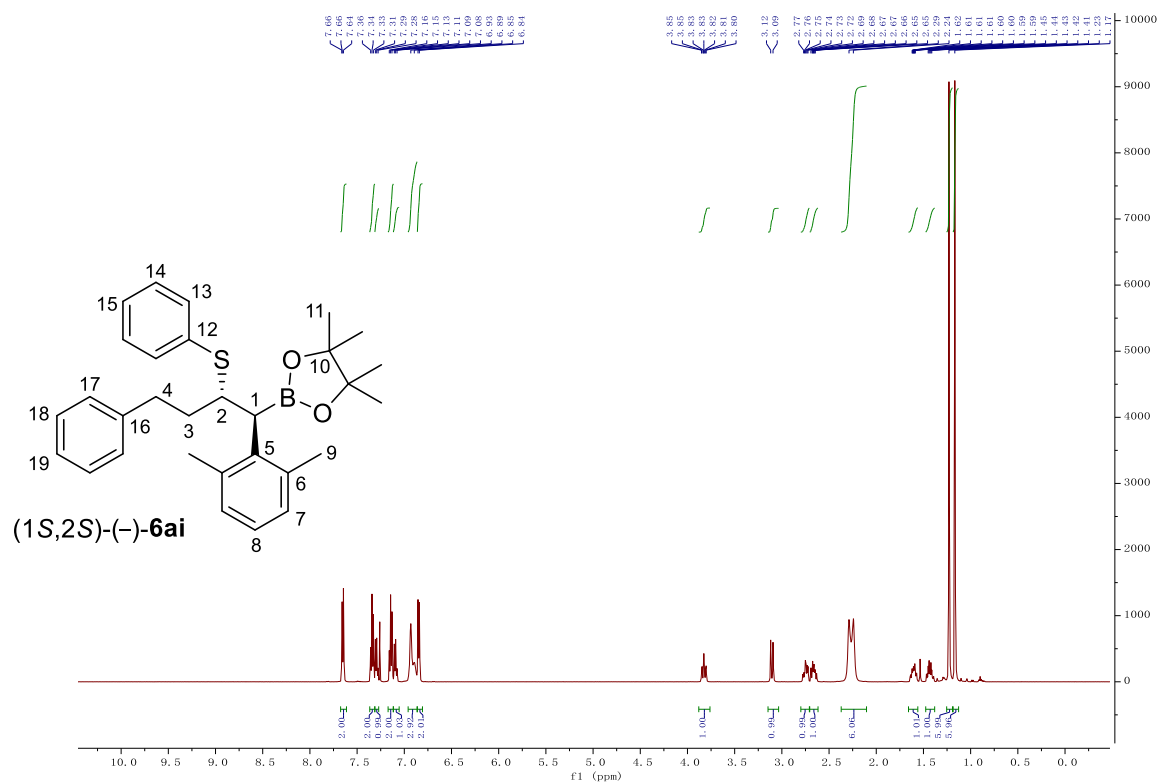

(1*S*,2*S*)-(-)-**6ai** <sup>13</sup>C NMR (126 MHz, CDCl<sub>3</sub>)

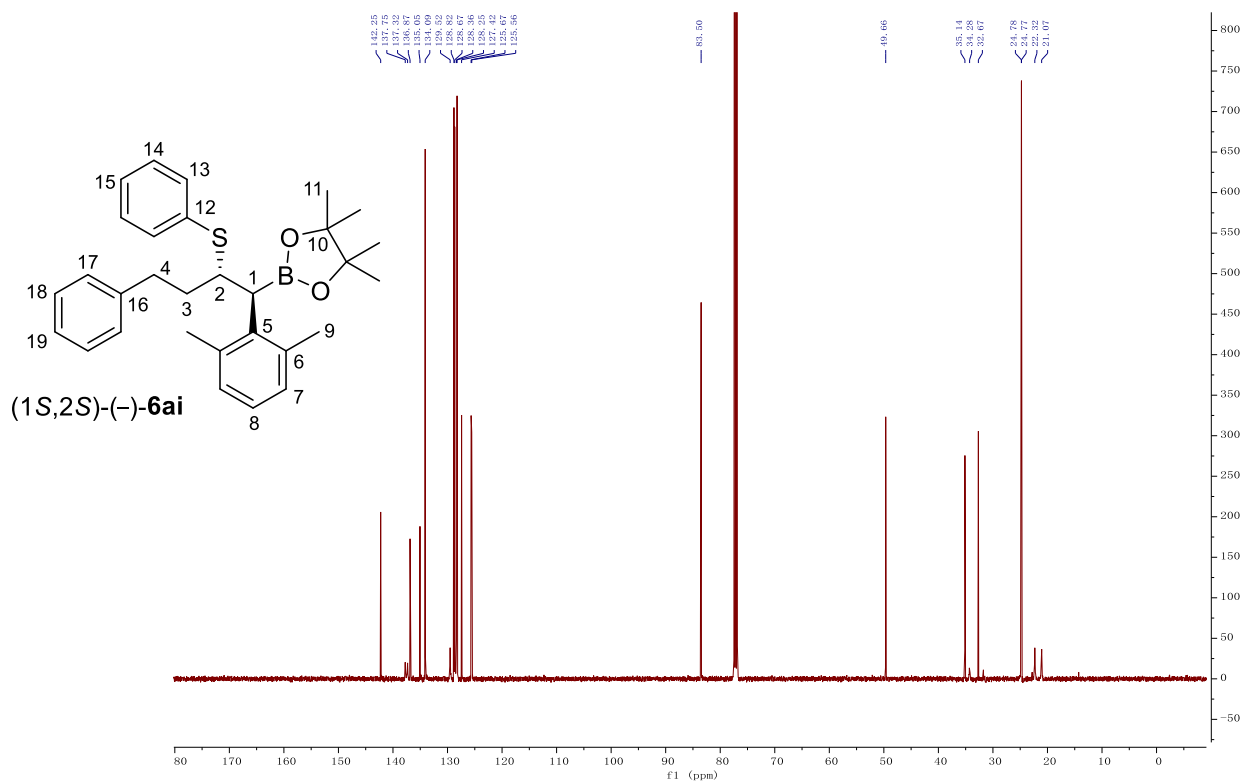

**(2*S*,3*S*)-14ga**  $^1\text{H}$  NMR (500 MHz,  $\text{CDCl}_3$ )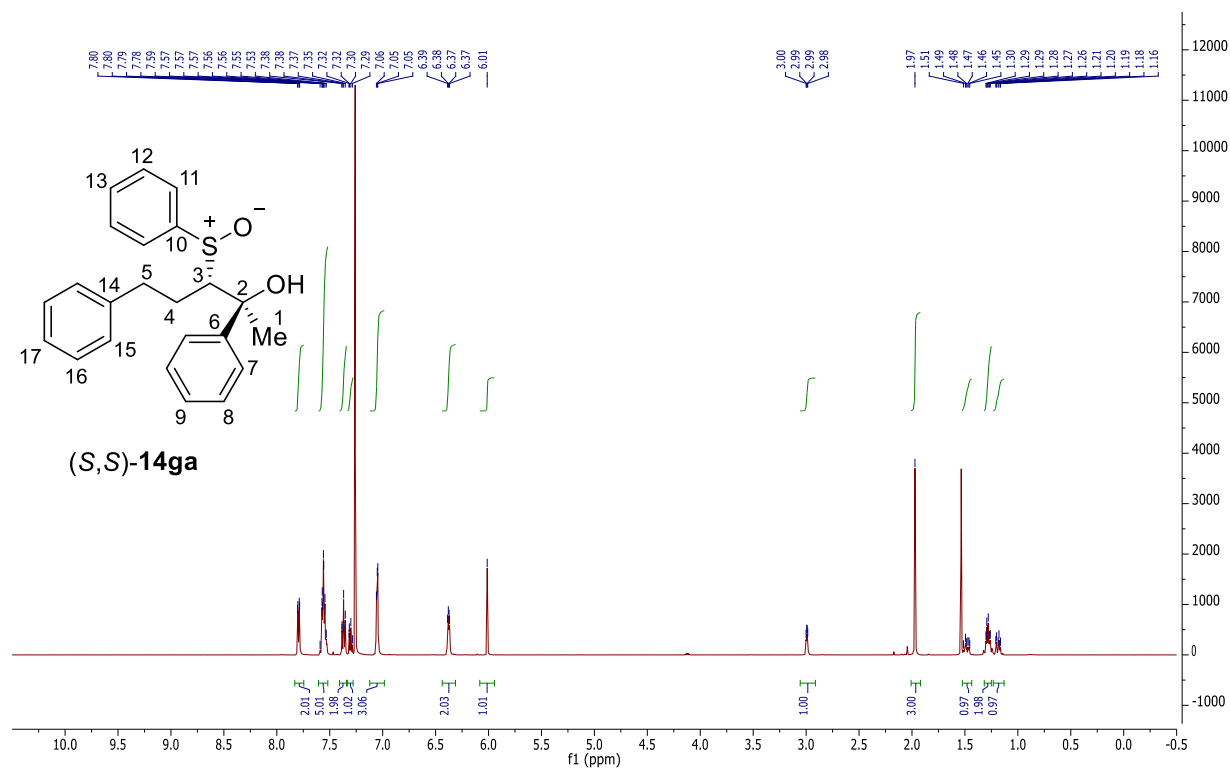**(2*S*,3*S*)-14ga**  $^{13}\text{C}$  NMR (126 MHz,  $\text{CDCl}_3$ )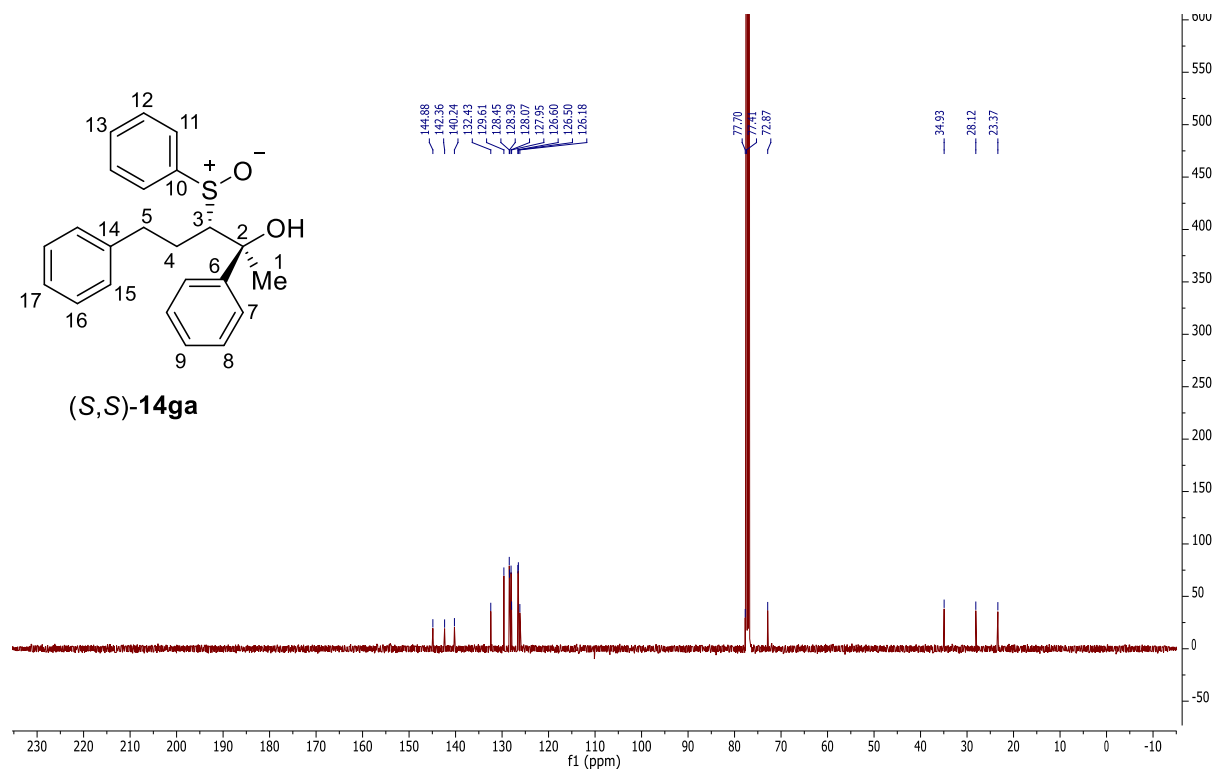

**(*R,E*)-15ga**  $^1\text{H}$  NMR (500 MHz,  $\text{CDCl}_3$ )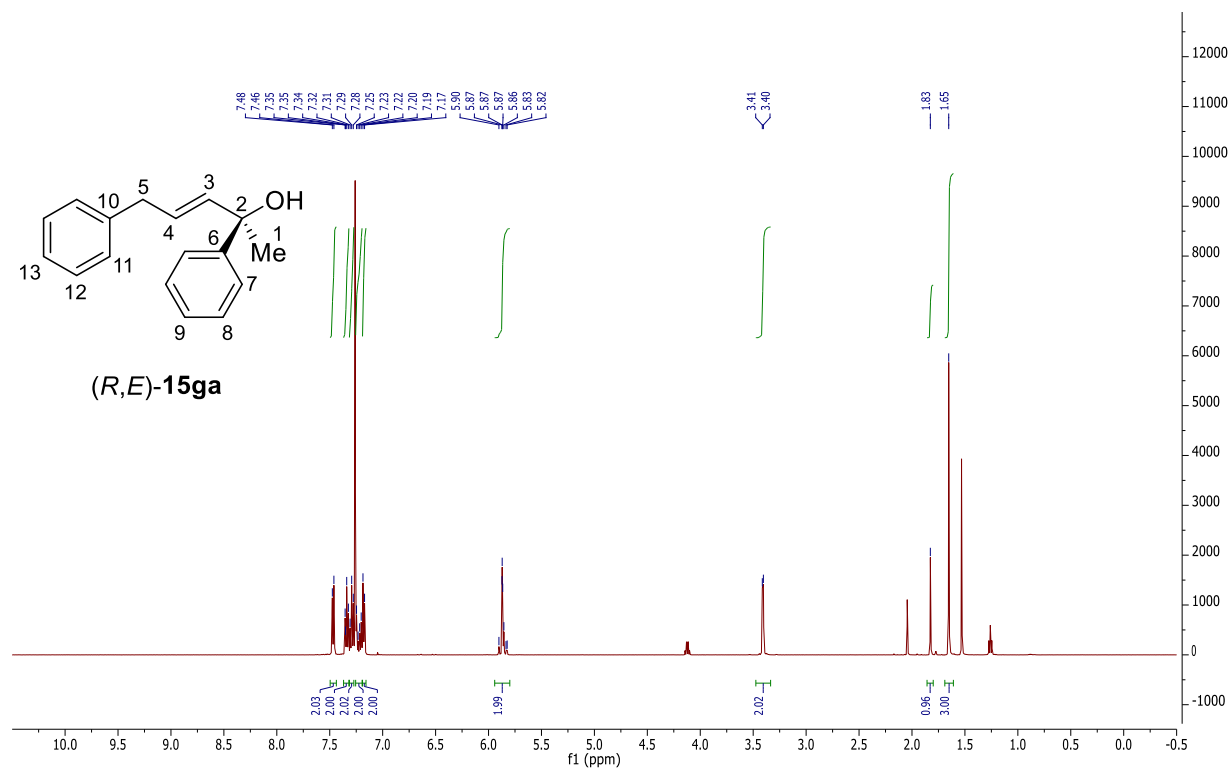**(*R,E*)-15ga**  $^{13}\text{C}$  NMR (126 MHz,  $\text{CDCl}_3$ )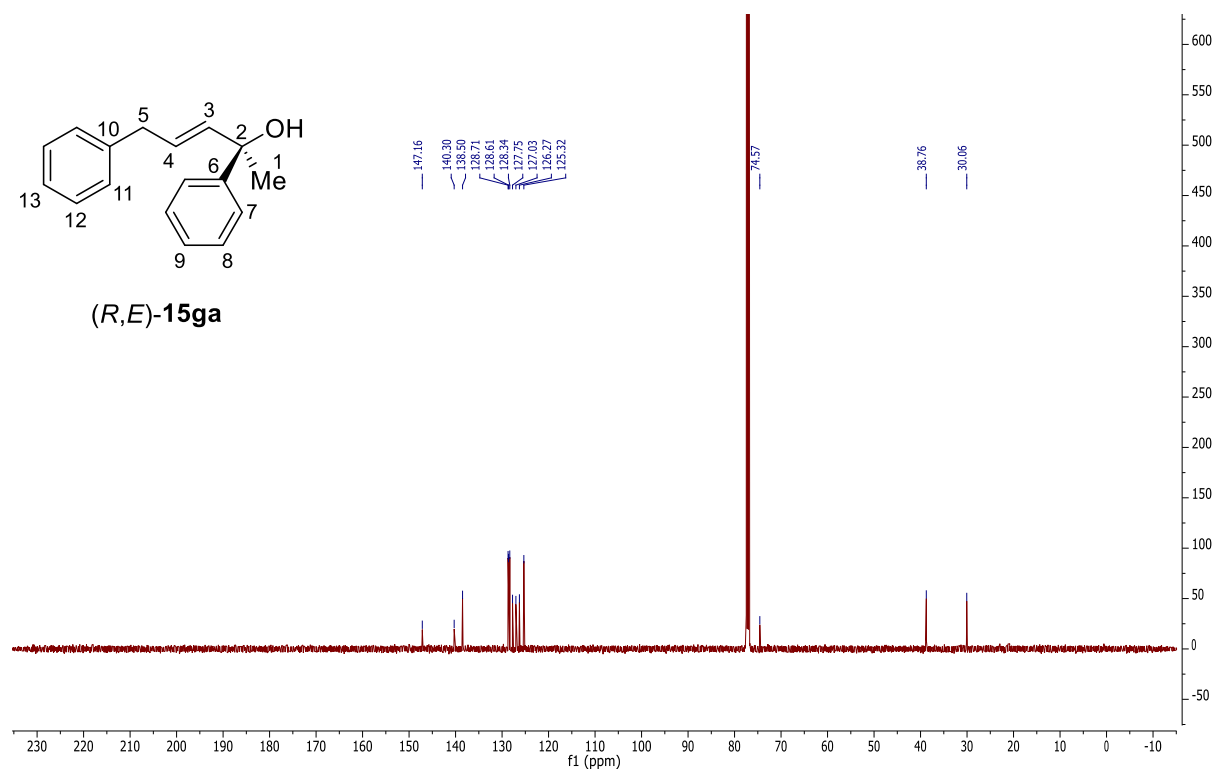

**(S)-(+)-17**  $^1\text{H}$  NMR (500 MHz,  $\text{CDCl}_3$ )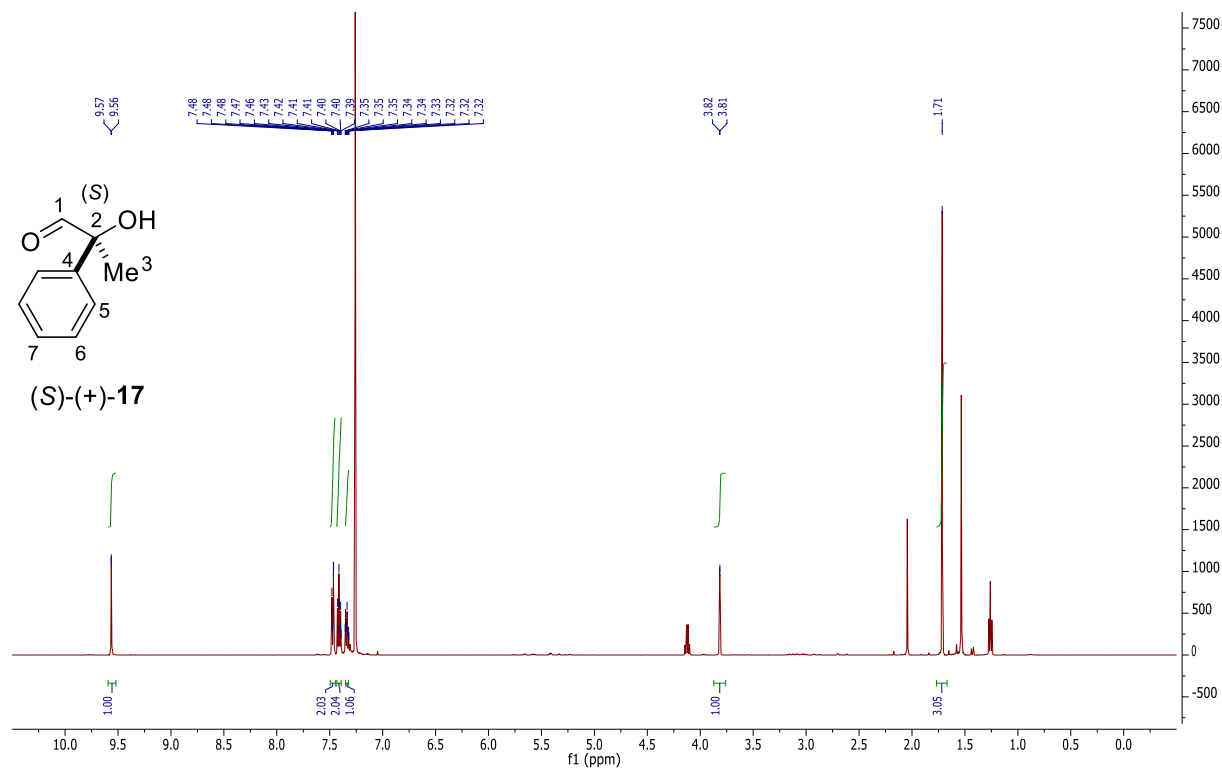**(S)-(+)-17**  $^{13}\text{C}$  NMR (126 MHz,  $\text{CDCl}_3$ )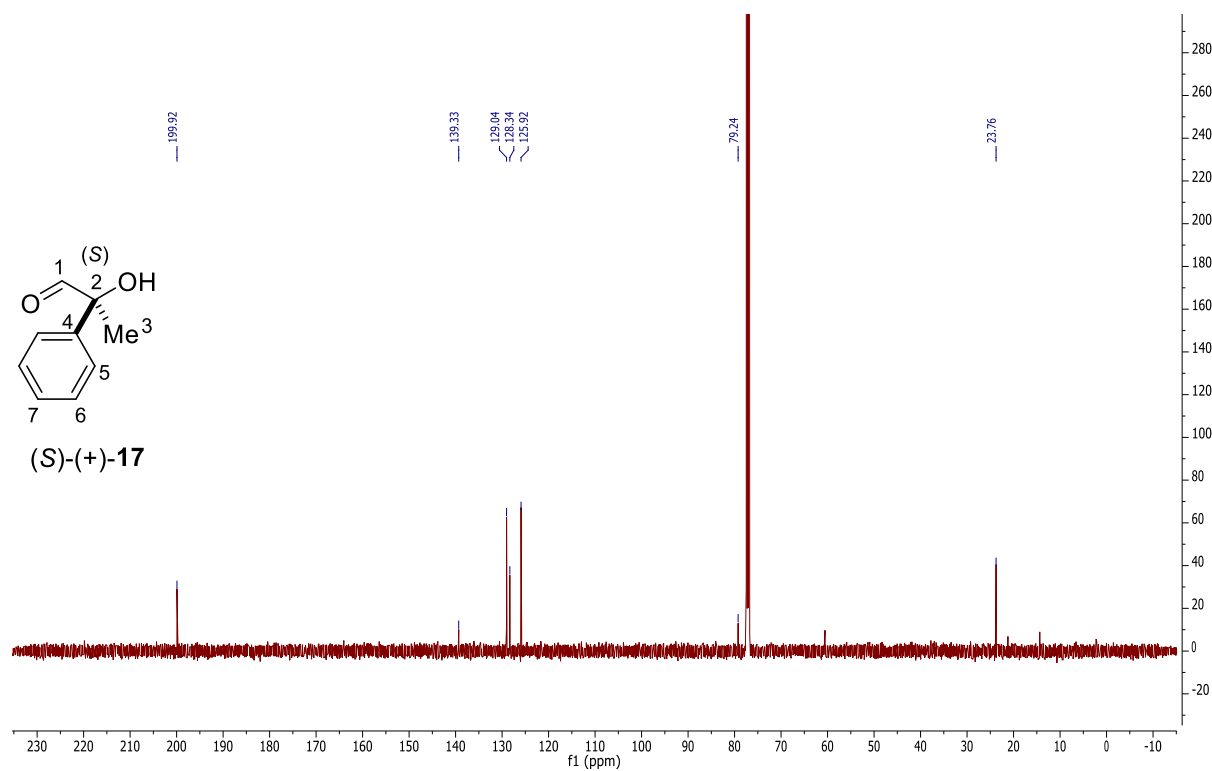

(*S*)-**18** (crude, mixture of diastereomers)  $^1\text{H}$  NMR (500 MHz,  $\text{CDCl}_3$ )

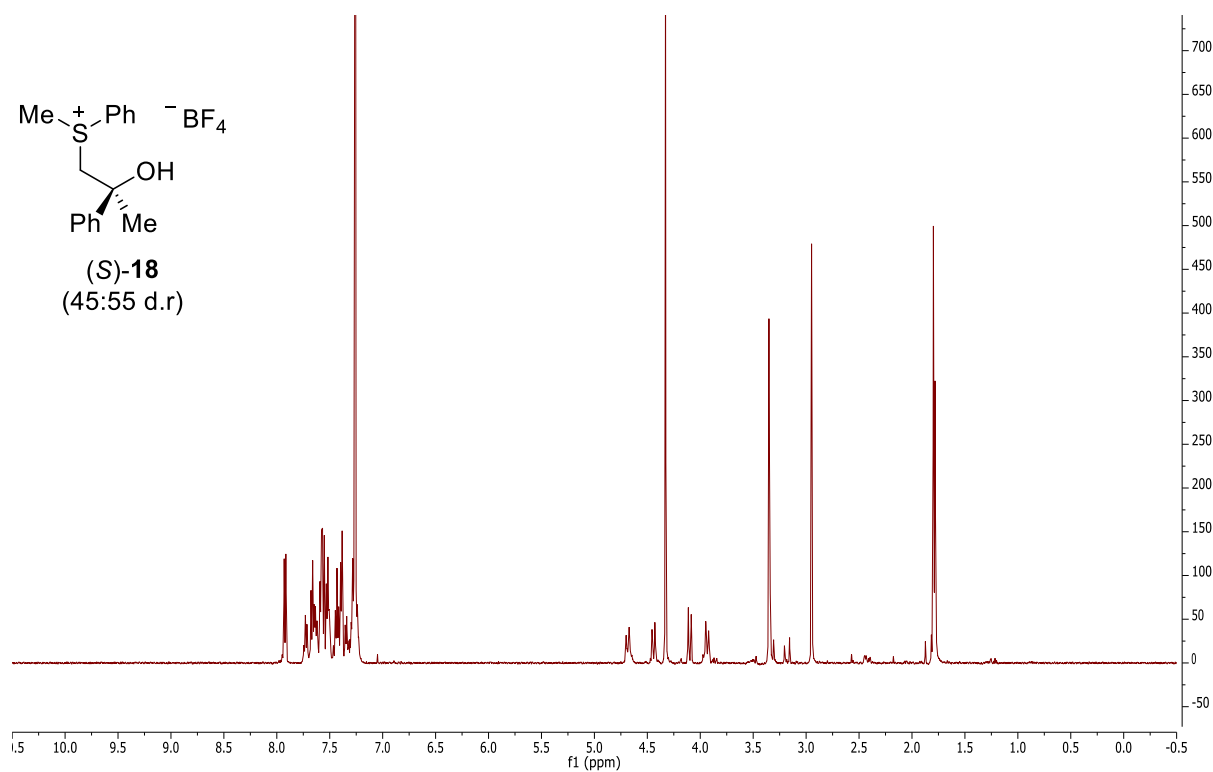

(*S*)-(+)-**19**  $^1\text{H}$  NMR (500 MHz,  $\text{CDCl}_3$ )

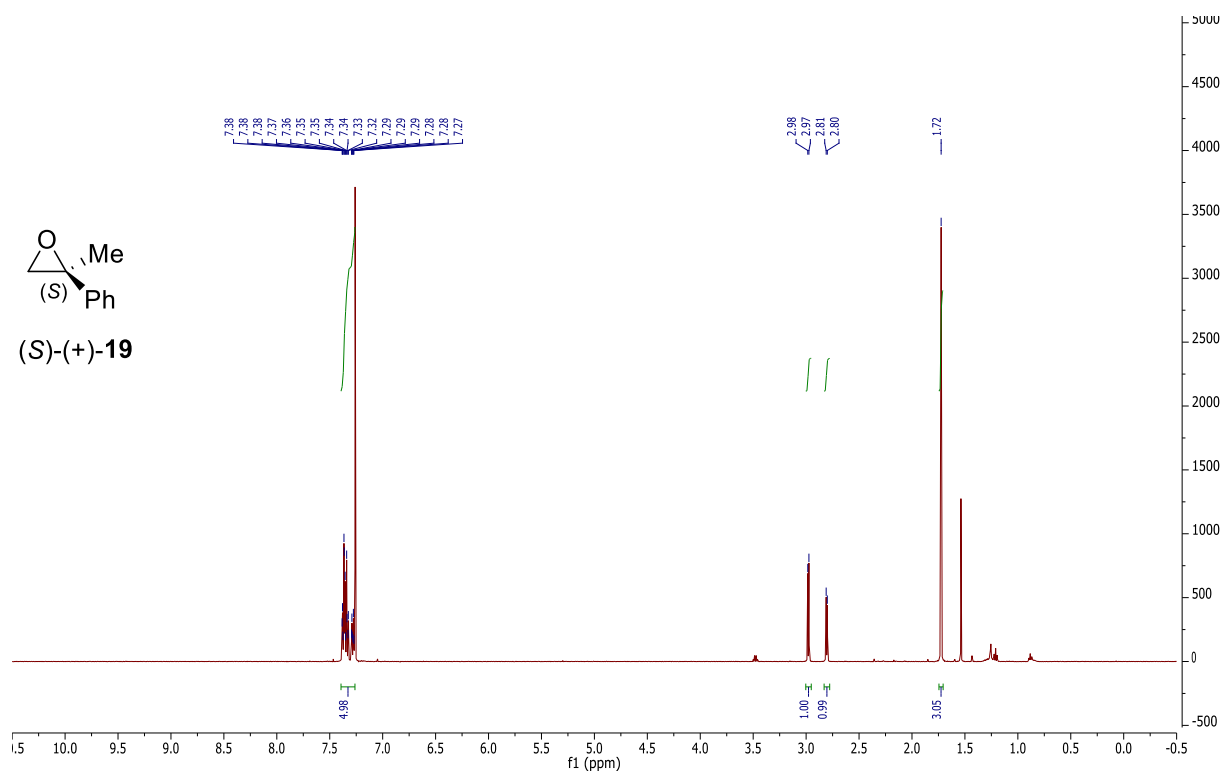

**(R)-(+)-20**  $^1\text{H}$  NMR (500 MHz,  $\text{CDCl}_3$ )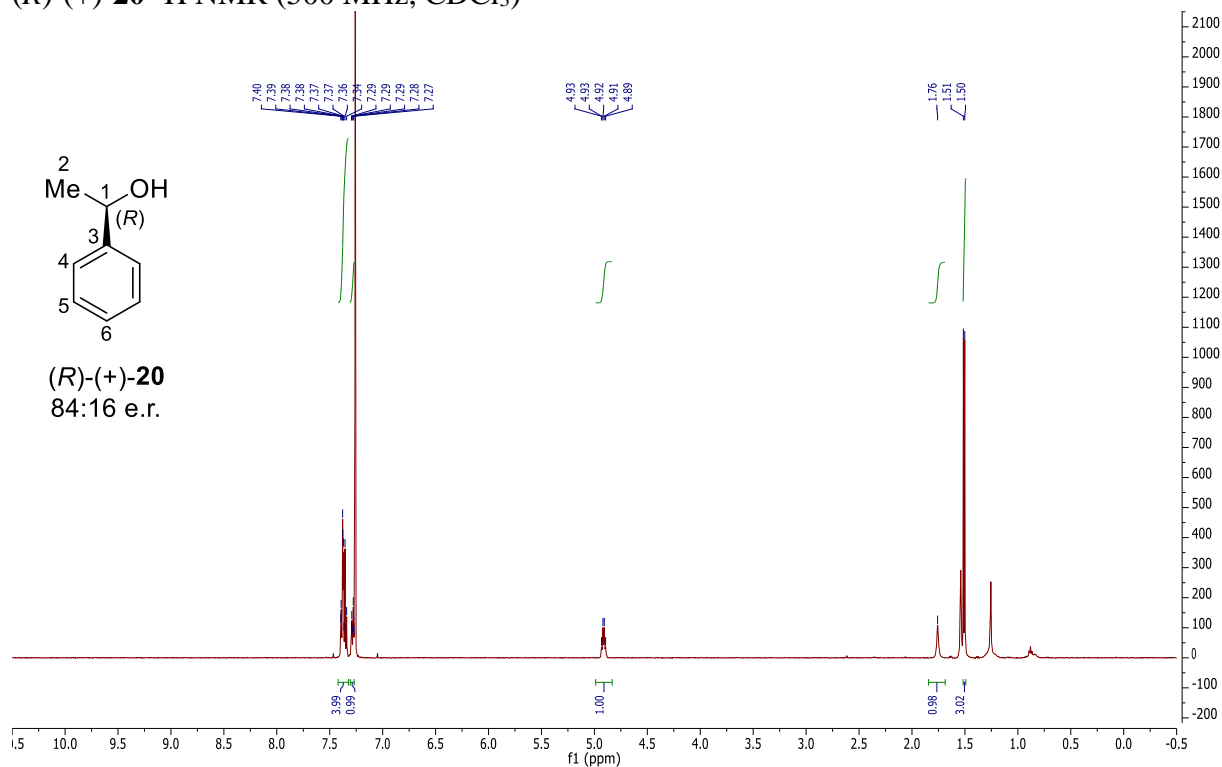**(R)-(+)-20**  $^{13}\text{C}$  NMR (126 MHz,  $\text{CDCl}_3$ )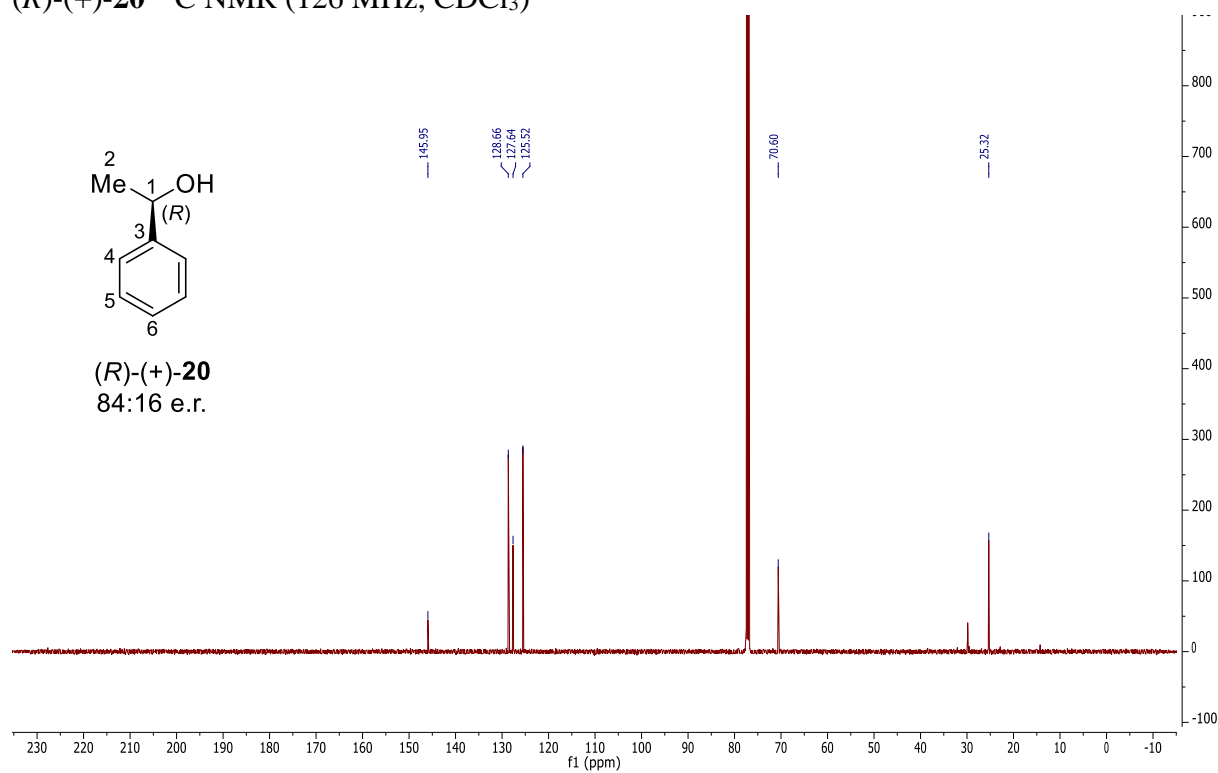

**(S)-21**  $^1\text{H}$  NMR (500 MHz,  $\text{CDCl}_3$ )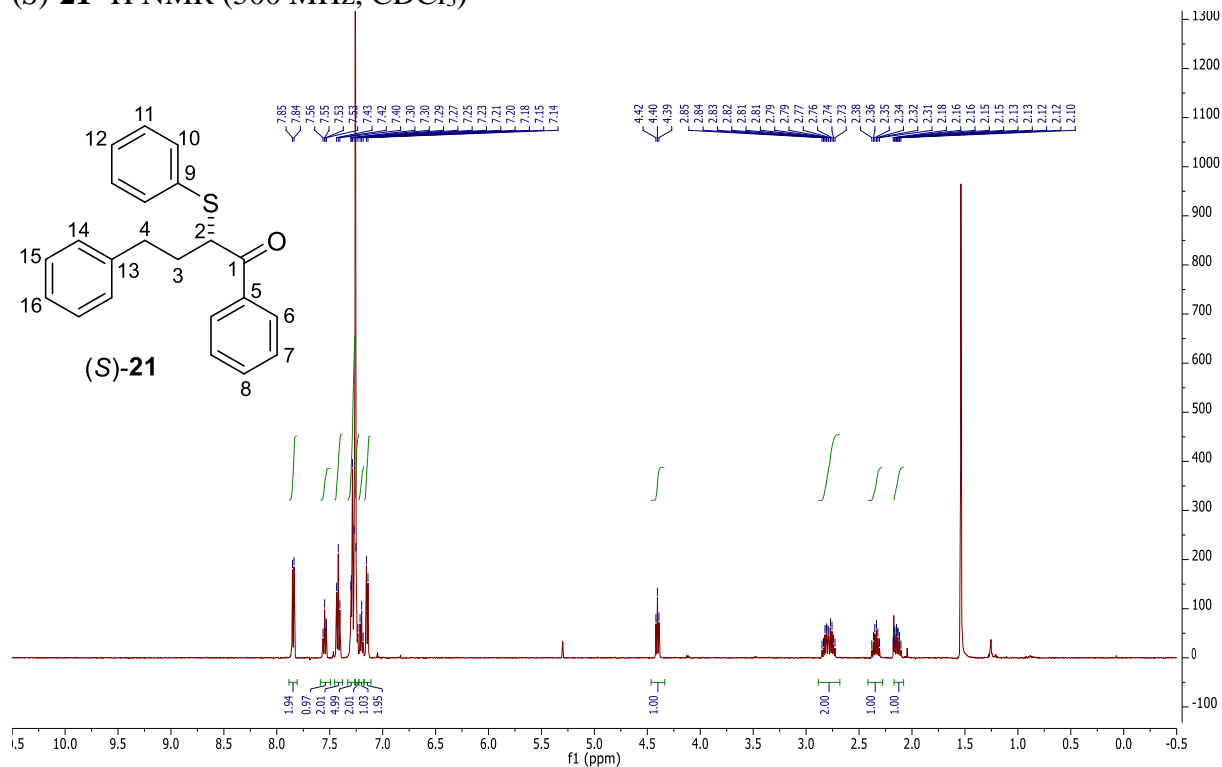**(S)-21**  $^{13}\text{C}$  NMR (126 MHz,  $\text{CDCl}_3$ )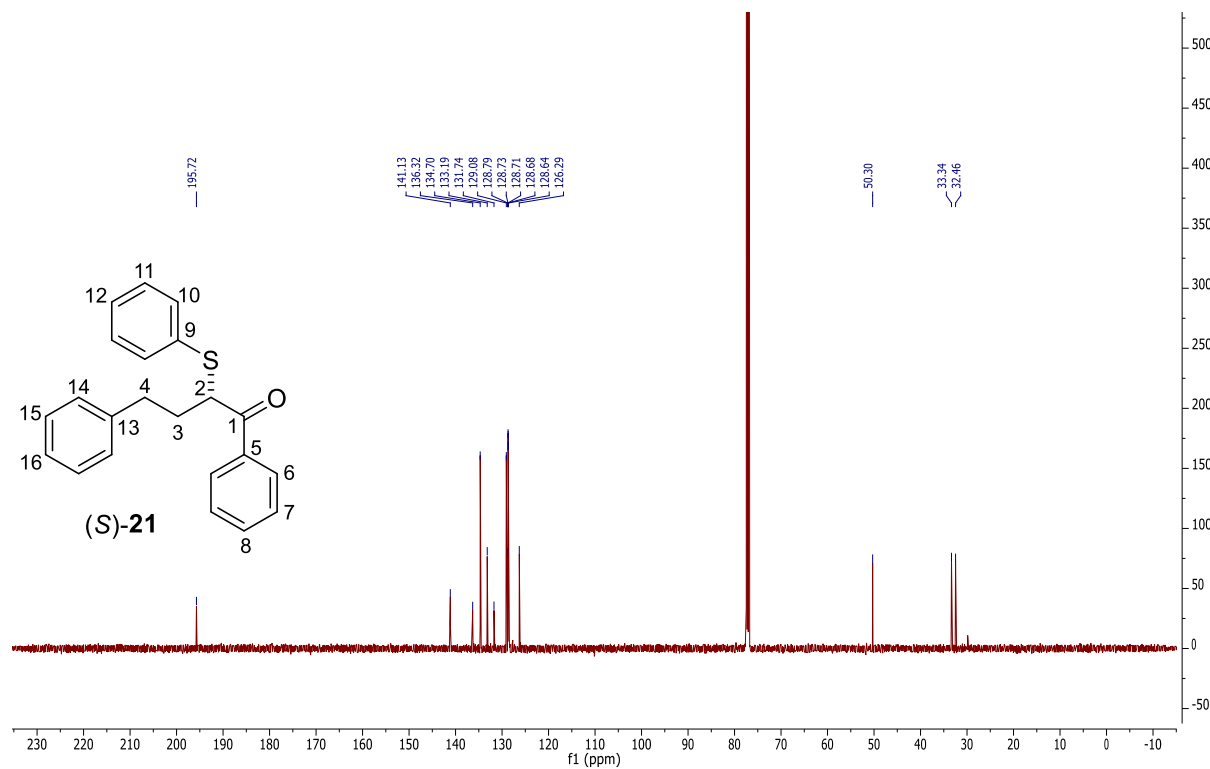

**(R)-(-)-11aa**  $^1\text{H}$  NMR (500 MHz,  $\text{CDCl}_3$ )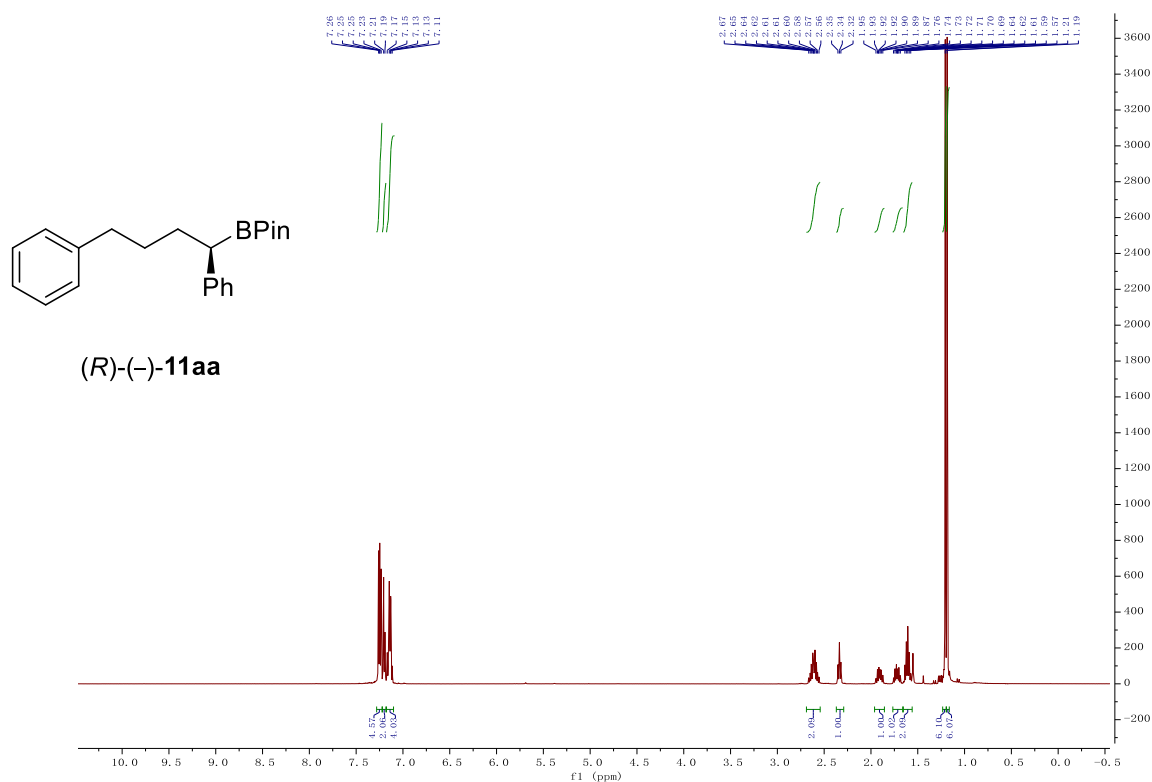**(R)-(-)-11aa**  $^{13}\text{C}$  NMR (126 MHz,  $\text{CDCl}_3$ )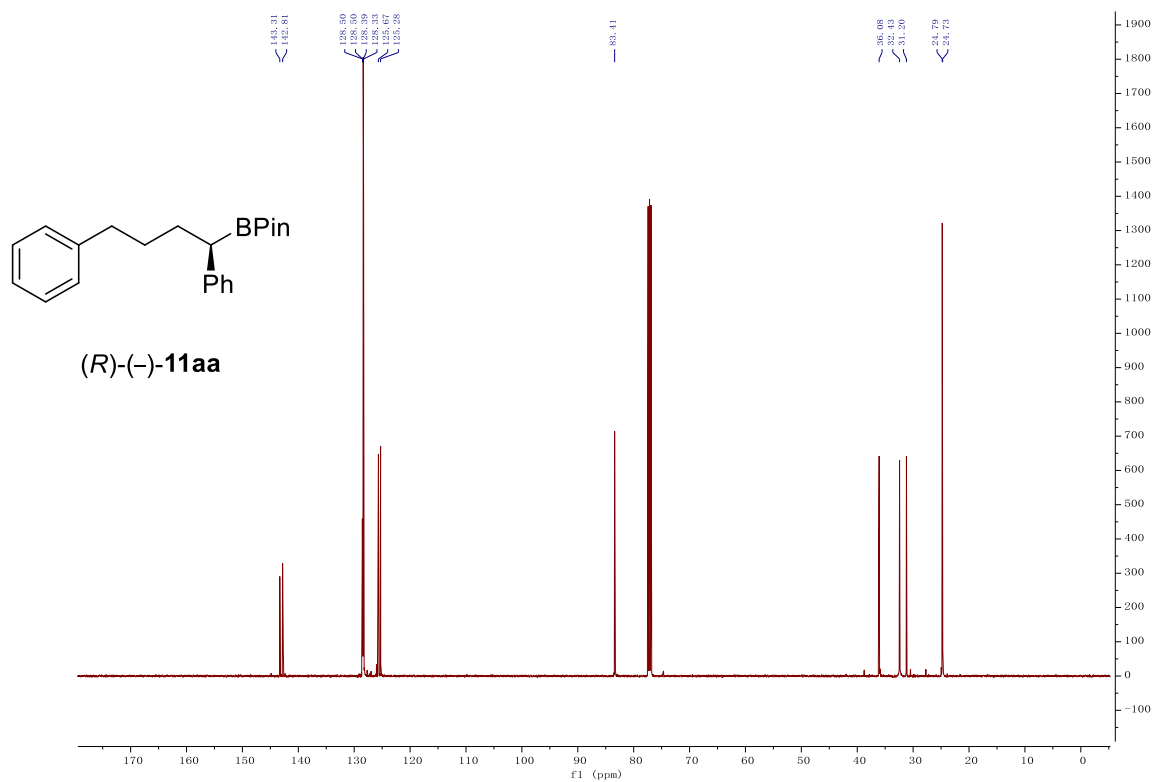

**(R)-22**  $^1\text{H}$  NMR (500 MHz,  $\text{CDCl}_3$ )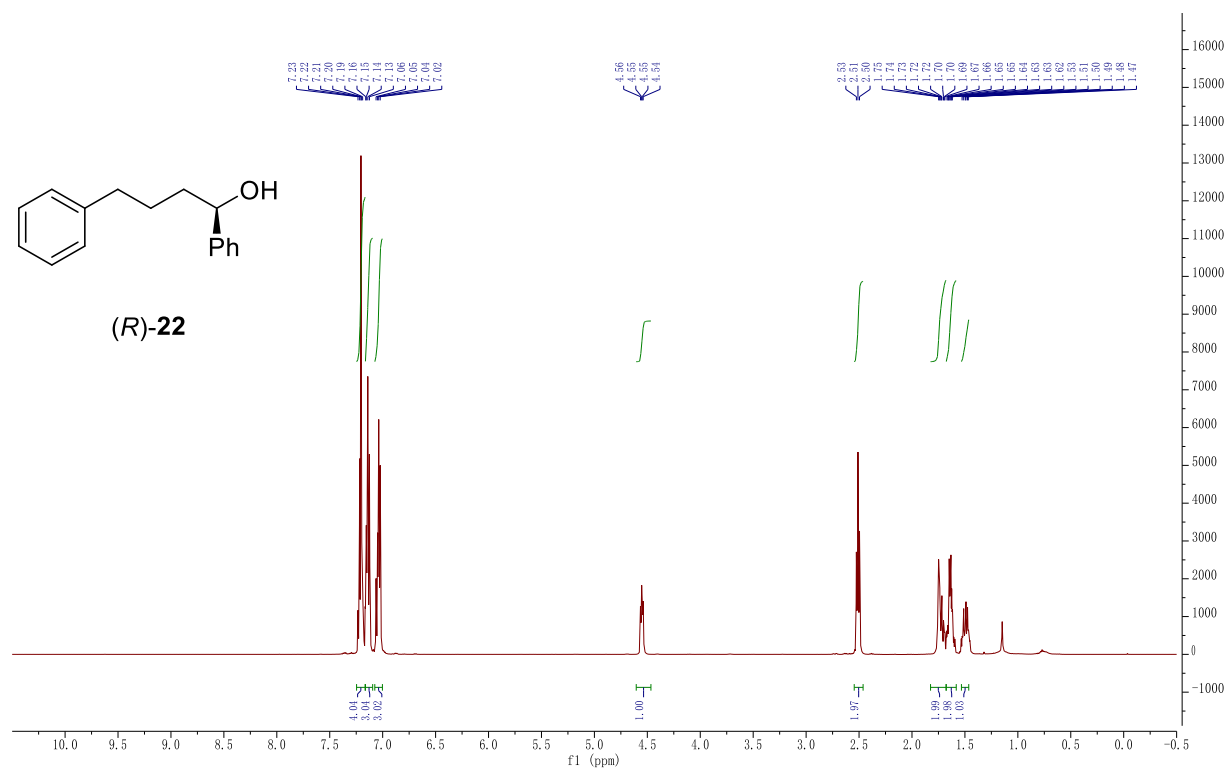**(R)-22**  $^{13}\text{C}$  NMR (126 MHz,  $\text{CDCl}_3$ )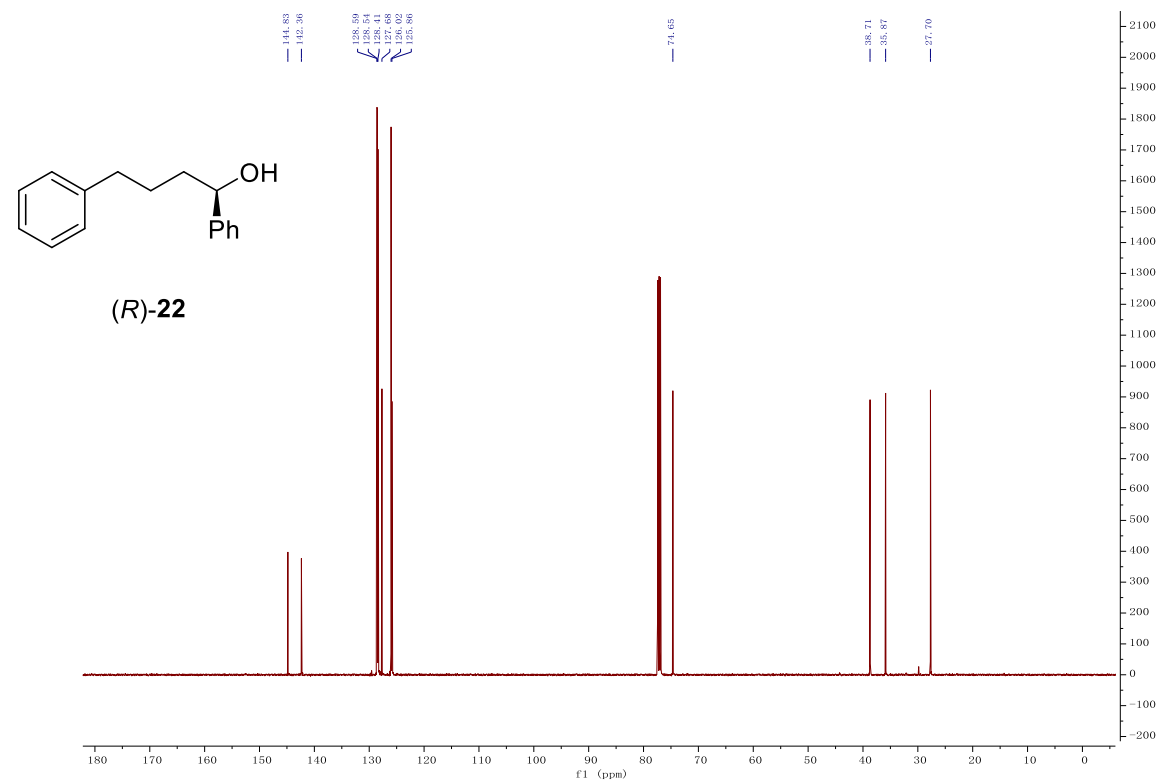

**(±)-22**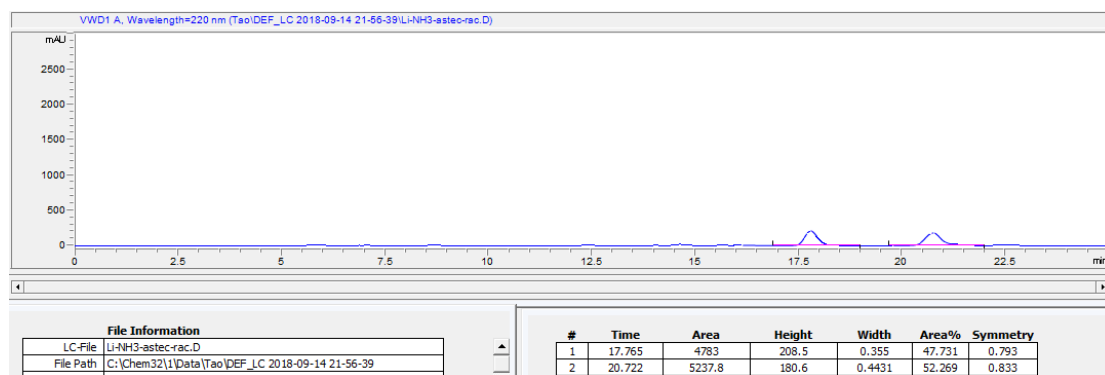**(R)-22**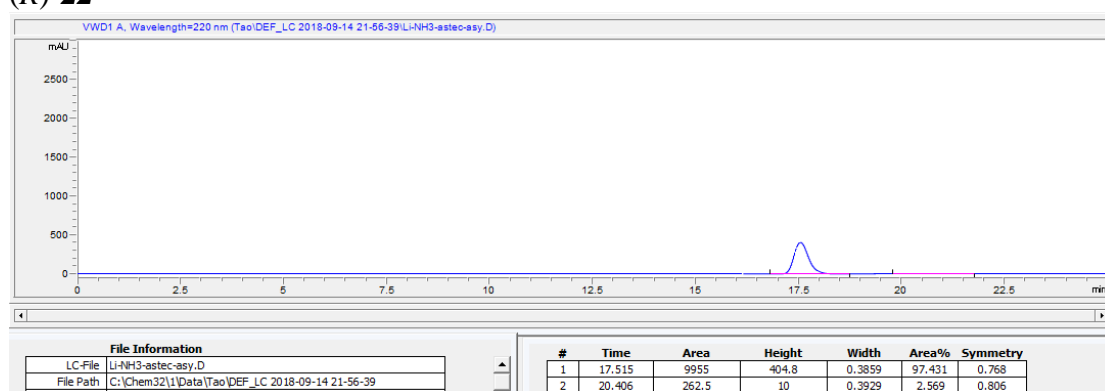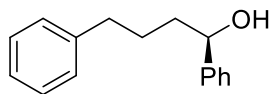**(R)-22**

**(S)-23**  $^1\text{H}$  NMR (500 MHz,  $\text{CDCl}_3$ )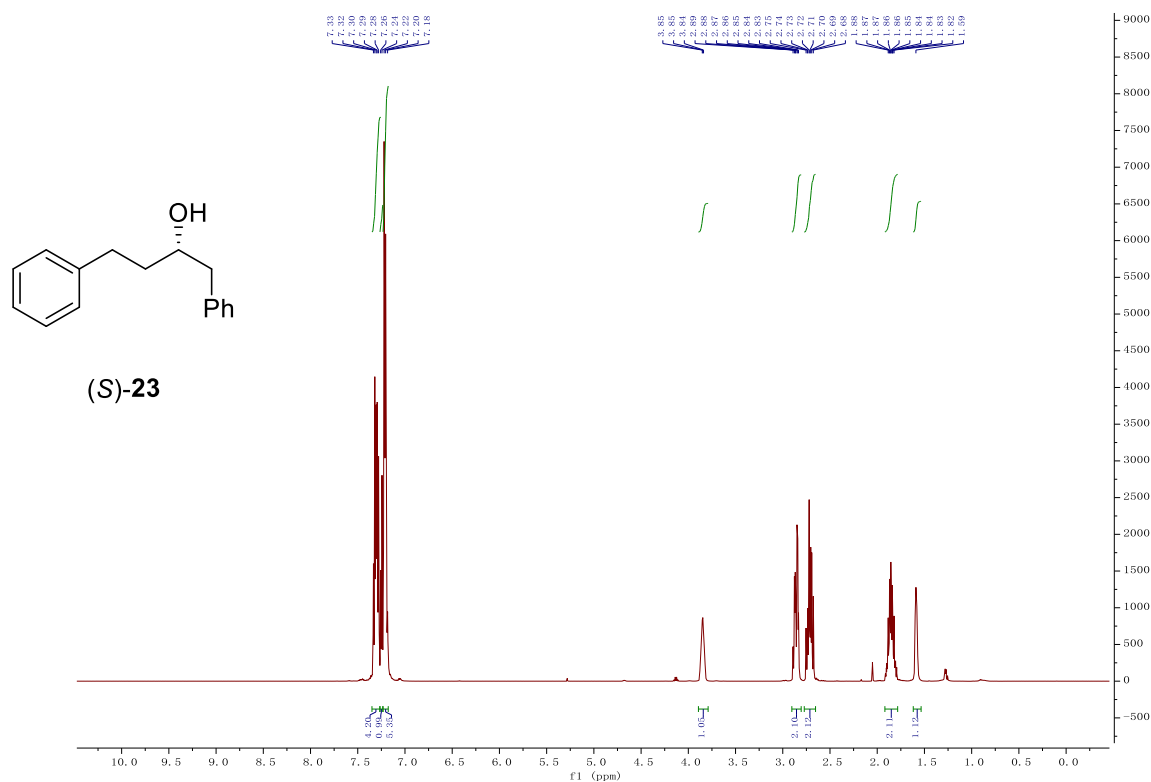**(S)-23**  $^{13}\text{C}$  NMR (126 MHz,  $\text{CDCl}_3$ )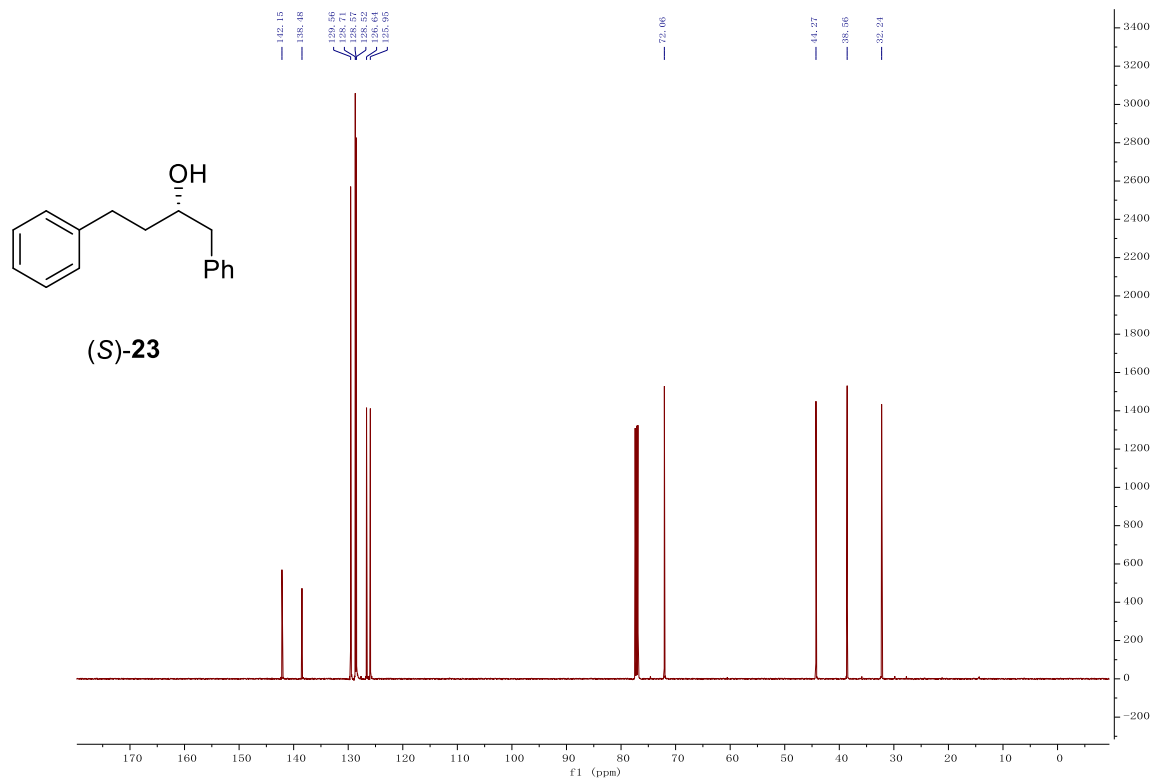

**(±)-23**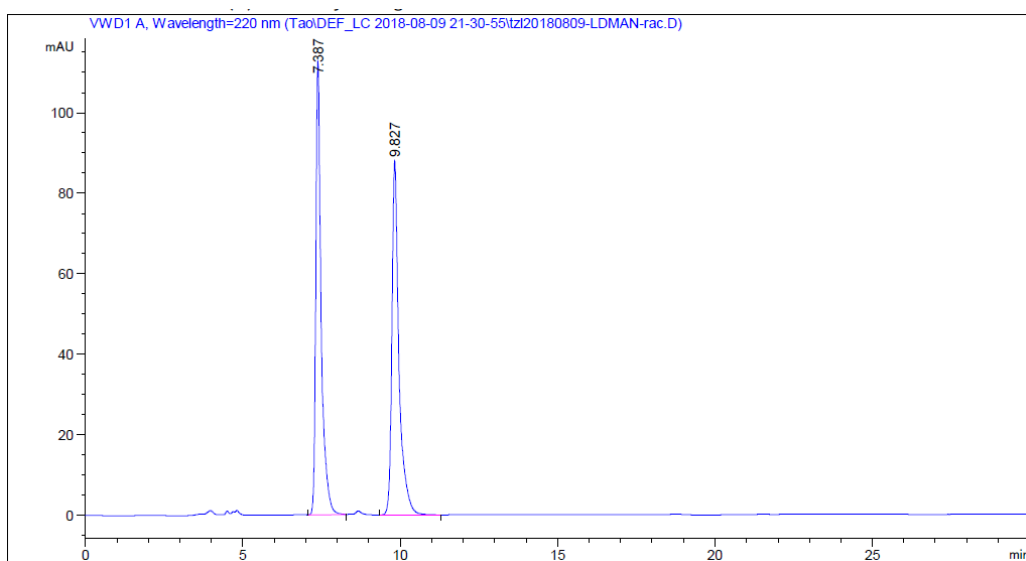**(S)-23**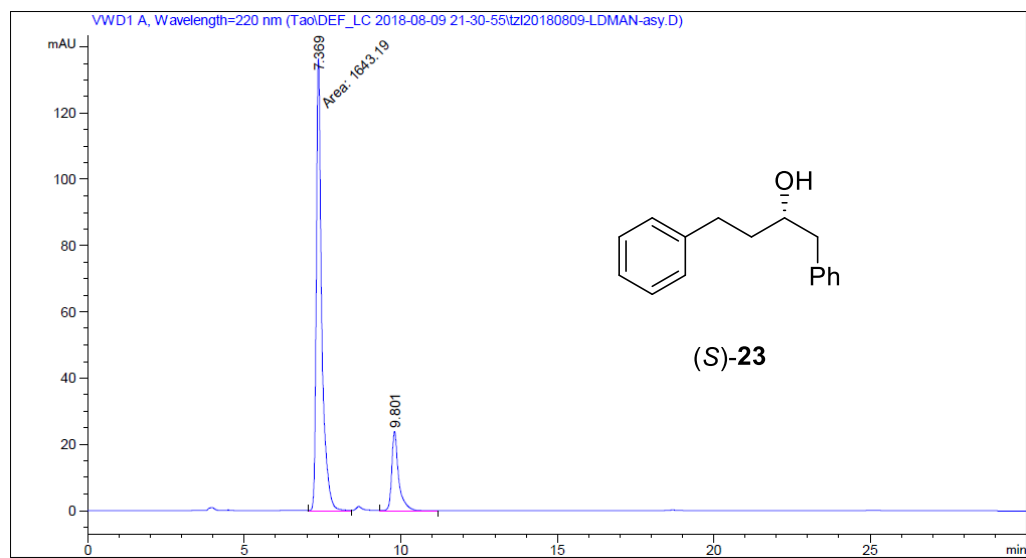

[illegible]

**(1*R*,2*S*)-13aa (syn)**

(1*S*,2*S*)-**syn**-**24**  $^1\text{H}$  NMR (500 MHz,  $\text{CDCl}_3$ )

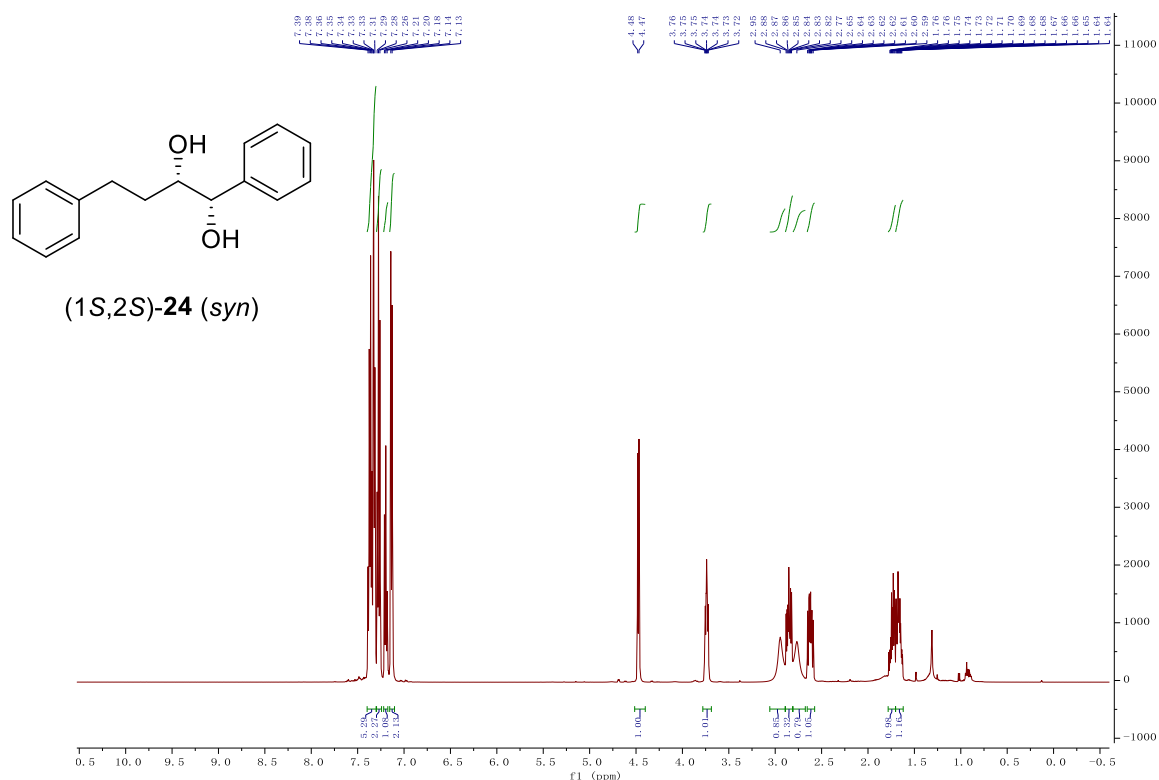

(1*S*,2*S*)-**syn**-**24**  $^{13}\text{C}$  NMR (126 MHz,  $\text{CDCl}_3$ )

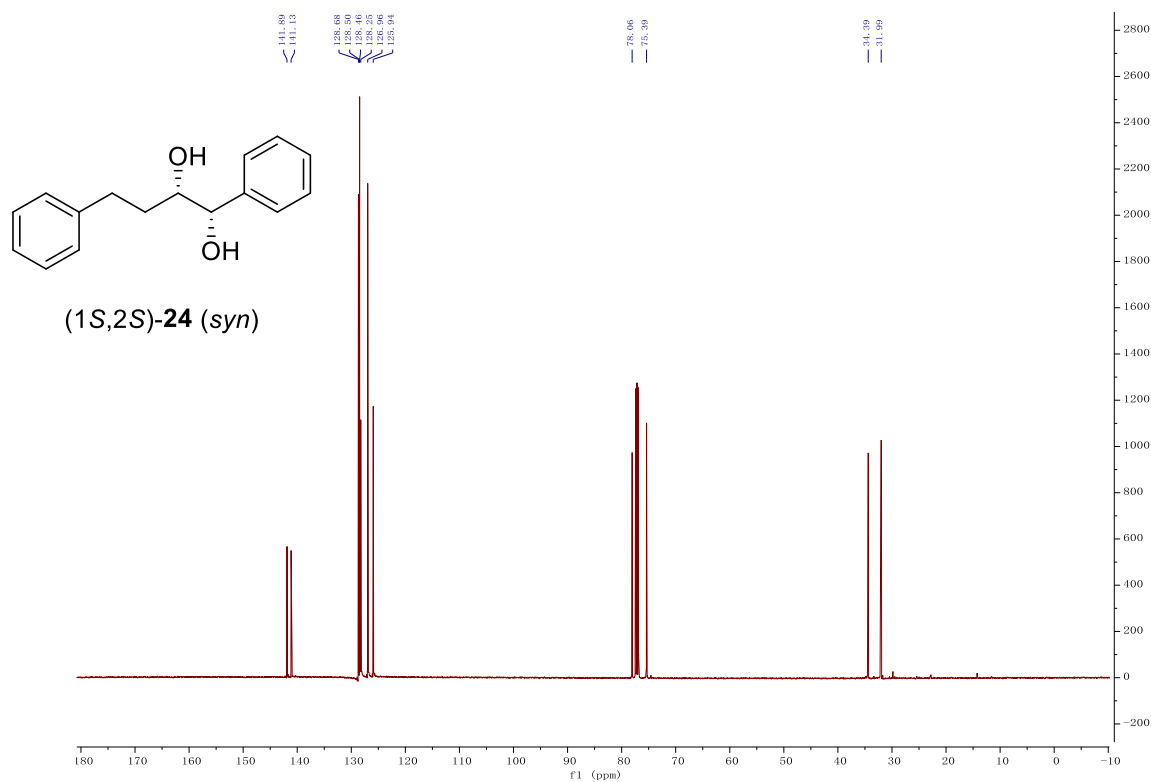

**(±)-syn-24**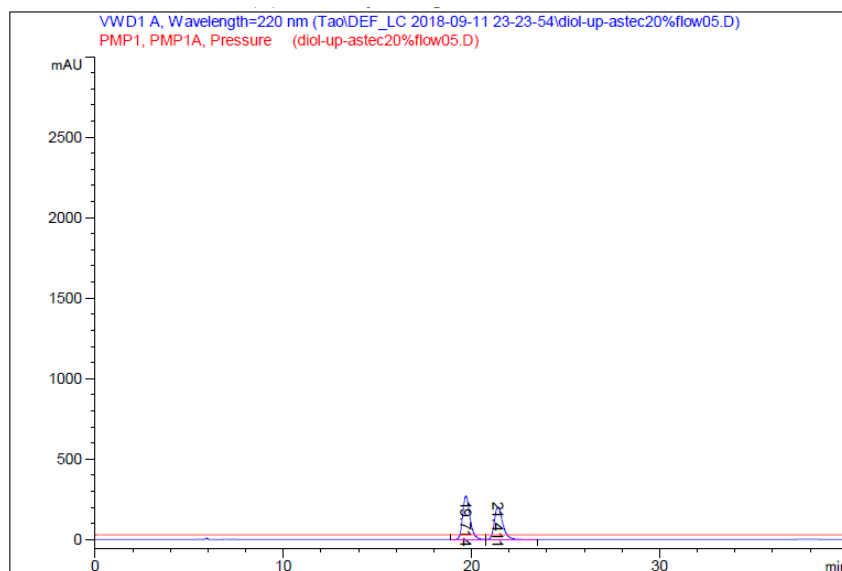

| Peak # | RetTime [min] | Type | Width [min] | Area [mAU*s] | Height [mAU] | Area %  |
|--------|---------------|------|-------------|--------------|--------------|---------|
| 1      | 19.714        | VV   | 0.4196      | 7423.31104   | 270.16803    | 54.2779 |
| 2      | 21.411        | VB   | 0.4773      | 6253.18018   | 202.16299    | 45.7221 |

**(1*S*,2*S*)-syn-24**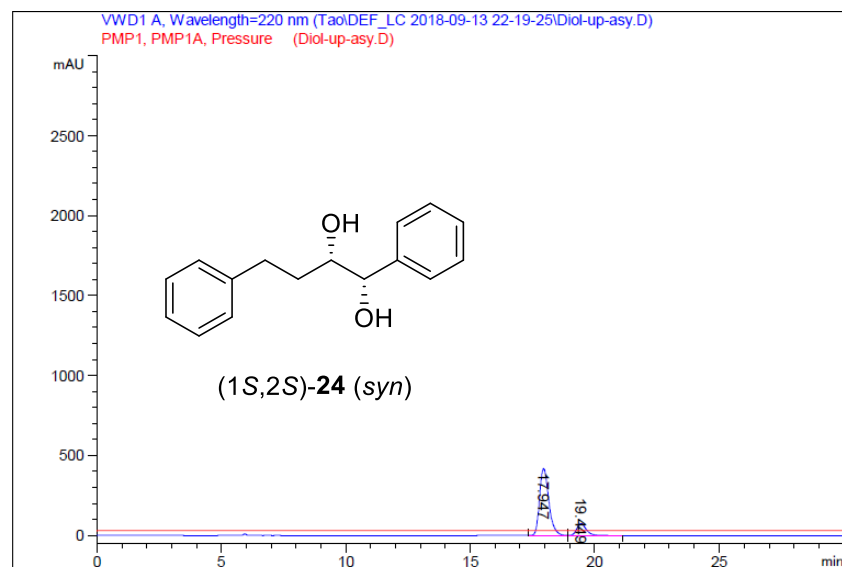

| Peak # | RetTime [min] | Type | Width [min] | Area [mAU*s] | Height [mAU] | Area %  |
|--------|---------------|------|-------------|--------------|--------------|---------|
| 1      | 17.947        | VV   | 0.4041      | 1.09446e4    | 418.55154    | 84.0713 |
| 2      | 19.449        | VV   | 0.4122      | 2073.64014   | 75.84149     | 15.9287 |

**(1*S*,2*S*)-anti-13aa**  $^1\text{H}$  NMR (500 MHz,  $\text{CDCl}_3$ )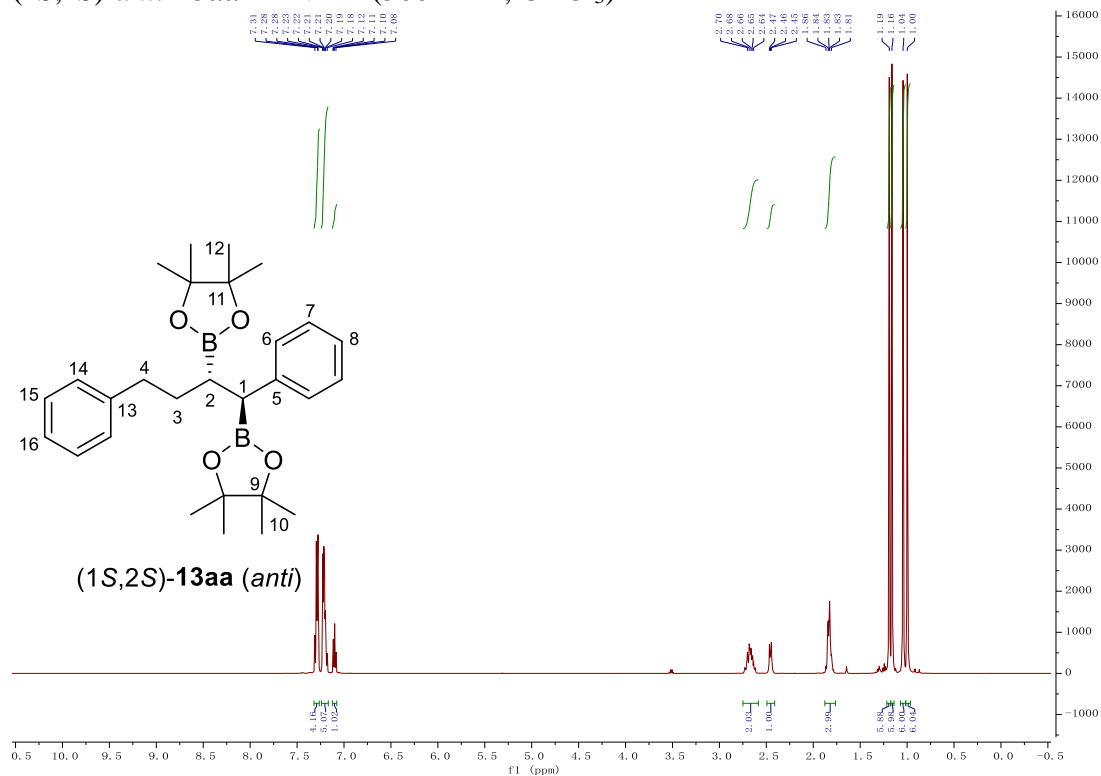**(1*S*,2*S*)-anti-13aa**  $^{13}\text{C}$  NMR (126 MHz,  $\text{CDCl}_3$ )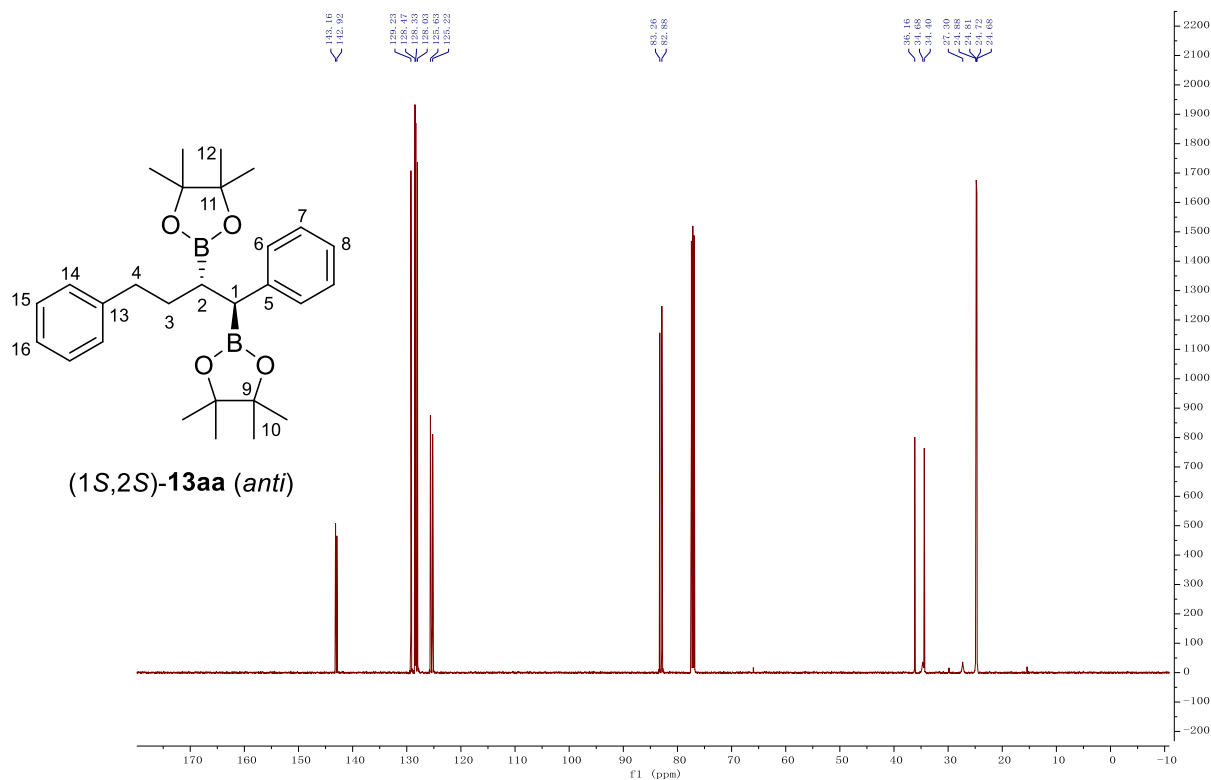

(1*R*,2*S*)-*anti*-**24**  $^1\text{H}$  NMR (500 MHz,  $\text{CDCl}_3$ )

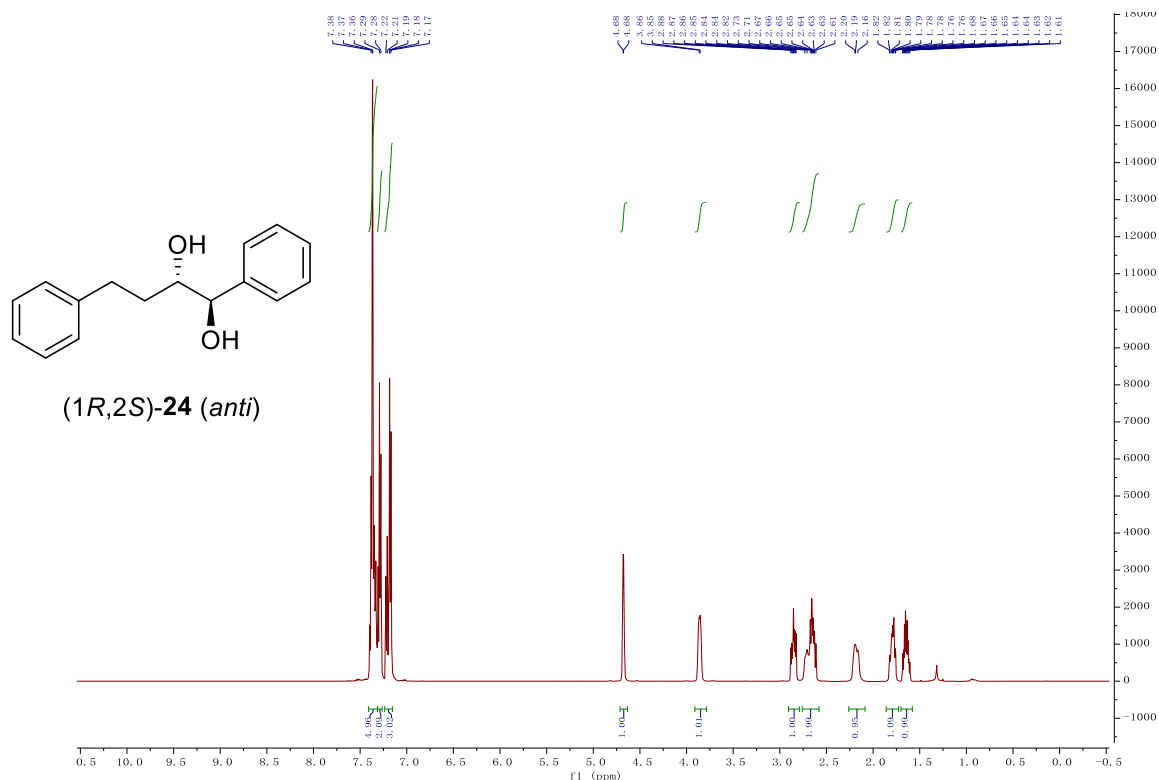

(1*R*,2*S*)-*anti*-**24**  $^{13}\text{C}$  NMR (126 MHz,  $\text{CDCl}_3$ )

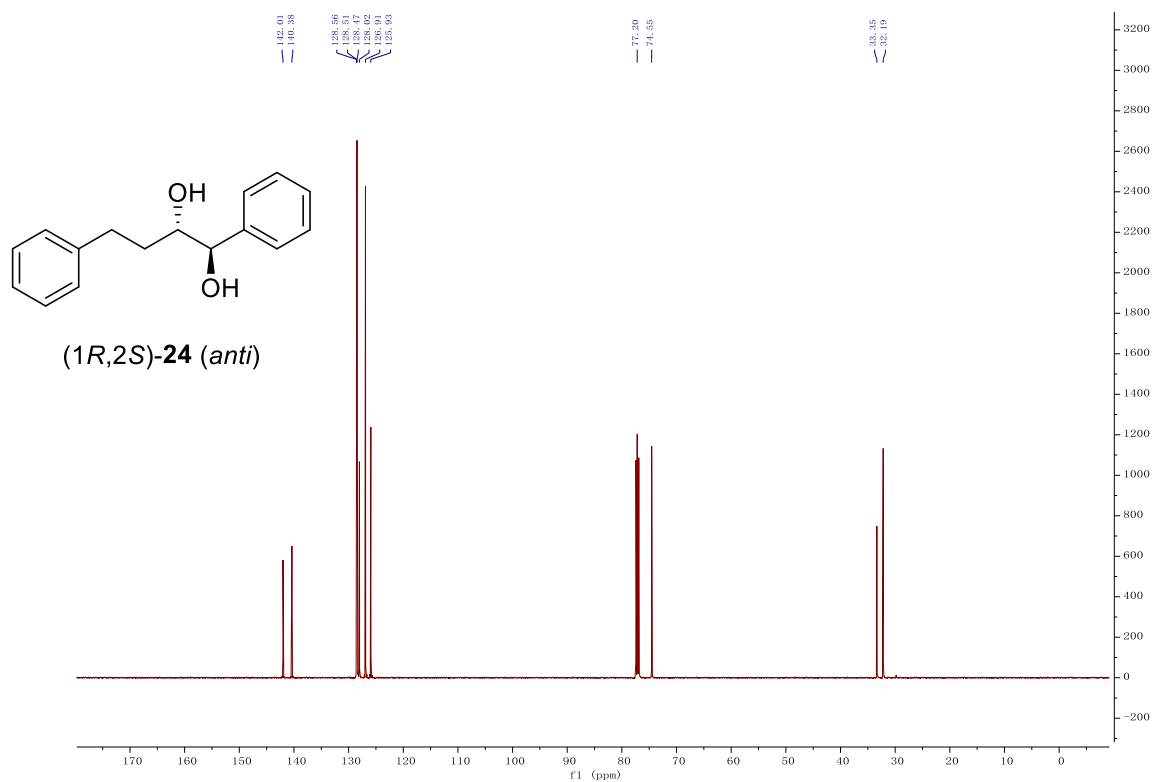

**(±)-anti-24**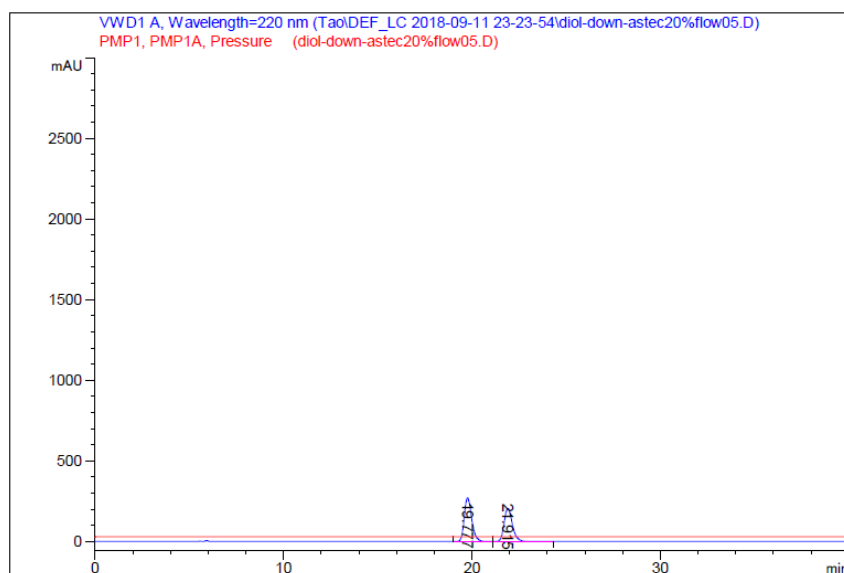

| Peak # | RetTime [min] | Type | Width [min] | Area [mAU*s] | Height [mAU] | Area %  |
|--------|---------------|------|-------------|--------------|--------------|---------|
| 1      | 19.777        | BV   | 0.4306      | 7594.12598   | 271.94031    | 54.3374 |
| 2      | 21.915        | VB   | 0.4778      | 6381.73584   | 206.06836    | 45.6626 |

**(1R,2S)-anti-24**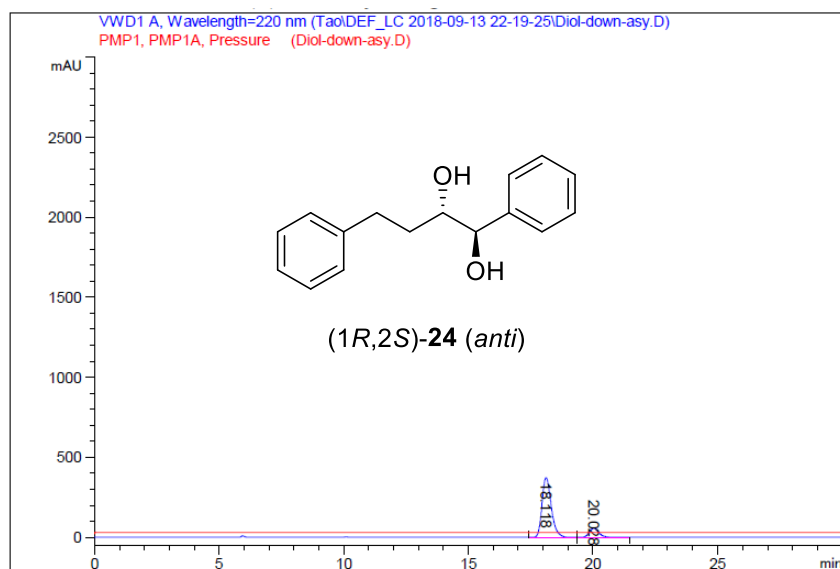

| Peak # | RetTime [min] | Type | Width [min] | Area [mAU*s] | Height [mAU] | Area %  |
|--------|---------------|------|-------------|--------------|--------------|---------|
| 1      | 18.118        | VV   | 0.4024      | 9697.09180   | 372.87738    | 85.9655 |
| 2      | 20.028        | VB   | 0.4175      | 1583.11707   | 57.98481     | 14.0345 |

**(1S,2S)-14aa**

O[C@H](c1ccccc1)[C@H](Cc2ccccc2)S(=O)(=O)c3ccccc3

<sup>1</sup>H NMR spectrum (CDCl<sub>3</sub>) showing chemical shifts (ppm) and integration values.

Chemical structure of (1S,2S)-14aa is shown with proton labels 1 through 16.

Integration values (from left to right): 3.02, 5.02, 3.00, 2.00, 1.03, 0.88, 1.00, 2.01, 1.00, 0.98.

Chemical shifts (ppm) are listed above the peaks:

- 7.25, 7.24, 7.18, 7.17, 7.16, 7.15, 7.14, 7.13, 7.12, 7.11, 7.10, 7.09, 7.08, 7.07, 7.06, 7.05, 7.04, 7.03, 7.02, 7.01, 7.00, 6.99, 6.98, 6.97, 6.96, 6.95, 6.94, 6.93, 6.92, 6.91, 6.90, 6.89, 6.88, 6.87, 6.86, 6.85, 6.84, 6.83, 6.82, 6.81, 6.80, 6.79, 6.78, 6.77, 6.76, 6.75, 6.74, 6.73, 6.72, 6.71, 6.70, 6.69, 6.68, 6.67, 6.66, 6.65, 6.64, 6.63, 6.62, 6.61, 6.60, 6.59, 6.58, 6.57, 6.56, 6.55, 6.54, 6.53, 6.52, 6.51, 6.50, 6.49, 6.48, 6.47, 6.46, 6.45, 6.44, 6.43, 6.42, 6.41, 6.40, 6.39, 6.38, 6.37, 6.36, 6.35, 6.34, 6.33, 6.32, 6.31, 6.30, 6.29, 6.28, 6.27, 6.26, 6.25, 6.24, 6.23, 6.22, 6.21, 6.20, 6.19, 6.18, 6.17, 6.16, 6.15, 6.14, 6.13, 6.12, 6.11, 6.10, 6.09, 6.08, 6.07, 6.06, 6.05, 6.04, 6.03, 6.02, 6.01, 6.00, 5.99, 5.98, 5.97, 5.96, 5.95, 5.94, 5.93, 5.92, 5.91, 5.90, 5.89, 5.88, 5.87, 5.86, 5.85, 5.84, 5.83, 5.82, 5.81, 5.80, 5.79, 5.78, 5.77, 5.76, 5.75, 5.74, 5.73, 5.72, 5.71, 5.70, 5.69, 5.68, 5.67, 5.66, 5.65, 5.64, 5.63, 5.62, 5.61, 5.60, 5.59, 5.58, 5.57, 5.56, 5.55, 5.54, 5.53, 5.52, 5.51, 5.50, 5.49, 5.48, 5.47, 5.46, 5.45, 5.44, 5.43, 5.42, 5.41, 5.40, 5.39, 5.38, 5.37, 5.36, 5.35, 5.34, 5.33, 5.32, 5.31, 5.30, 5.29, 5.28, 5.27, 5.26, 5.25, 5.24, 5.23, 5.22, 5.21, 5.20, 5.19, 5.18, 5.17, 5.16, 5.15, 5.14, 5.13, 5.12, 5.11, 5.10, 5.09, 5.08, 5.07, 5.06, 5.05, 5.04, 5.03, 5.02, 5.01, 5.00, 4.99, 4.98, 4.97, 4.96, 4.95, 4.94, 4.93, 4.92, 4.91, 4.90, 4.89, 4.88, 4.87, 4.86, 4.85, 4.84, 4.83, 4.82, 4.81, 4.80, 4.79, 4.78, 4.77, 4.76, 4.75, 4.74, 4.73, 4.72, 4.71, 4.70, 4.69, 4.68, 4.67, 4.66, 4.65, 4.64, 4.63, 4.62, 4.61, 4.60, 4.59, 4.58, 4.57, 4.56, 4.55, 4.54, 4.53, 4.52, 4.51, 4.50, 4.49, 4.48, 4.47, 4.46, 4.45, 4.44, 4.43, 4.42, 4.41, 4.40, 4.39, 4.38, 4.37, 4.36, 4.35, 4.34, 4.33, 4.32, 4.31, 4.30, 4.29, 4.28, 4.27, 4.26, 4.25, 4.24, 4.23, 4.22, 4.21, 4.20, 4.19, 4.18, 4.17, 4.16, 4.15, 4.14, 4.13, 4.12, 4.11, 4.10, 4.09, 4.08, 4.07, 4.06, 4.05, 4.04, 4.03, 4.02, 4.01, 4.00, 3.99, 3.98, 3.97, 3.96, 3.95, 3.94, 3.93, 3.92, 3.91, 3.90, 3.89, 3.88, 3.87, 3.86, 3.85, 3.84, 3.83, 3.82, 3.81, 3.80, 3.79, 3.78, 3.77, 3.76, 3.75, 3.74, 3.73, 3.72, 3.71, 3.70, 3.69, 3.68, 3.67, 3.66, 3.65, 3.64, 3.63, 3.62, 3.61, 3.60, 3.59, 3.58, 3.57, 3.56, 3.55, 3.54, 3.53, 3.52, 3.51, 3.50, 3.49, 3.48, 3.47, 3.46, 3.45, 3.44, 3.43, 3.42, 3.41, 3.40, 3.39, 3.38, 3.37, 3.36, 3.35, 3.34, 3.33, 3.32, 3.31, 3.30, 3.29, 3.28, 3.27, 3.26, 3.25, 3.24, 3.23, 3.22, 3.21, 3.20, 3.19, 3.18, 3.17, 3.16, 3.15, 3.14, 3.13, 3.12, 3.11, 3.10, 3.09, 3.08, 3.07, 3.06, 3.05, 3.04, 3.03, 3.02, 3.01, 3.00, 2.99, 2.98, 2.97, 2.96, 2.95, 2.94, 2.93, 2.92, 2.91, 2.90, 2.89, 2.88, 2.87, 2.86, 2.85, 2.84, 2.83, 2.82, 2.81, 2.80, 2.79, 2.78, 2.77, 2.76, 2.75, 2.74, 2.73, 2.72, 2.71, 2.70, 2.69, 2.68, 2.67, 2.66, 2.65, 2.64, 2.63, 2.62, 2.61, 2.60, 2.59, 2.58, 2.57, 2.56, 2.55, 2.54, 2.53, 2.52, 2.51, 2.50, 2.49, 2.48, 2.47, 2.46, 2.45, 2.44, 2.43, 2.42, 2.41, 2.40, 2.39, 2.38, 2.37, 2.36, 2.35, 2.34, 2.33, 2.32, 2.31, 2.30, 2.29, 2.28, 2.27, 2.26, 2.25, 2.24, 2.23, 2.22, 2.21, 2.20, 2.19, 2.18, 2.17, 2.16, 2.15, 2.14, 2.13, 2.12, 2.11, 2.10, 2.09, 2.08, 2.07, 2.06, 2.05, 2.04, 2.03, 2.02, 2.01, 2.00, 1.99, 1.98, 1.97, 1.96, 1.95, 1.94, 1.93, 1.92, 1.91, 1.90, 1.89, 1.88, 1.87, 1.86, 1.85, 1.84, 1.83, 1.82, 1.81, 1.80, 1.79, 1.78, 1.77, 1.76, 1.75, 1.74, 1.73, 1.72, 1.71, 1.70, 1.69, 1.68, 1.67, 1.66, 1.65, 1.64, 1.63, 1.62, 1.61, 1.60, 1.59, 1.58, 1.57, 1.56, 1.55, 1.54, 1.53, 1.52, 1.51, 1.50, 1.49, 1.48, 1.47, 1.46, 1.45, 1.44, 1.43, 1.42, 1.41, 1.40, 1.39, 1.38, 1.37, 1.36, 1.35, 1.34, 1.33, 1.32, 1.31, 1.30, 1.29, 1.28, 1.27, 1.26, 1.25, 1.24, 1.23, 1.22, 1.21, 1.20, 1.19, 1.18, 1.17, 1.16, 1.15, 1.14, 1.13, 1.12, 1.11, 1.10, 1.09, 1.08, 1.07, 1.06, 1.05, 1.04, 1.03, 1.02, 1.01, 1.00, 0.99, 0.98, 0.97, 0.96, 0.95, 0.94, 0.93, 0.92, 0.91, 0.90, 0.89, 0.88, 0.87, 0

**(1S,2S)-14aa**

O[C@H](c1ccccc1)CC(c2ccccc2)CS(=O)(=O)c3ccccc3

<sup>13</sup>C NMR (ppm): 142.41, 140.51, 140.27, 138.63, 138.71, 129.43, 129.43, 128.17, 128.17, 128.13, 125.78, 76.21, 69.07, 33.12, 27.18.

**(1S,2S)-14aa**

<sup>1</sup>H NMR spectrum (CDCl<sub>3</sub>) of (1S,2S)-14aa. The chemical structure is shown with protons labeled 1 through 16. The spectrum displays peaks from 0 to 8 ppm. Key features include a broad singlet at 7.2 ppm (OH, 1H), aromatic signals between 6.5-7.6 ppm (10H), a doublet at 5.0 ppm (H-5, 1H), a doublet at 4.6 ppm (H-2, 1H), a singlet at 3.0 ppm (H-4, 1H), and aliphatic signals between 1.4-2.1 ppm (10H). Integration values are provided below the baseline.

**(1*S*,2*S*)-14aa**

Chemical structure of (1*S*,2*S*)-14aa is shown, featuring a chiral center (C1) and a sulfonate group. The structure is labeled with carbon numbers 1 through 16. The <sup>13</sup>C NMR spectrum displays peaks corresponding to these carbons, with the following chemical shifts (ppm) labeled above the peaks:

- 141.25
- 140.83
- 131.13
- 129.29
- 128.79
- 128.27
- 127.01
- 125.05
- 74.75
- 67.55
- 33.50
- 24.59

**(R)-15aa**

c1ccccc1/C=C/[C@H](c2ccccc2)O

<sup>1</sup>H NMR spectrum (CDCl<sub>3</sub>) of (R)-15aa. The x-axis represents the chemical shift in ppm (f1), ranging from 0.0 to 10.0. The y-axis represents the intensity, ranging from 0 to 9000. The spectrum shows several peaks, with integrations provided for the main signals. The chemical structure of (R)-15aa is shown as an inset.

| Chemical Shift (ppm) | Integration      |
|----------------------|------------------|
| 7.0 - 7.5            | 4.61, 3.46, 3.44 |
| 5.8 - 6.1            | 1.01, 1.23, 0.13 |
| 5.1                  | 1.00             |
| 3.5                  | 0.13, 0.14, 2.00 |
| 1.4 - 2.1            | 1.12             |

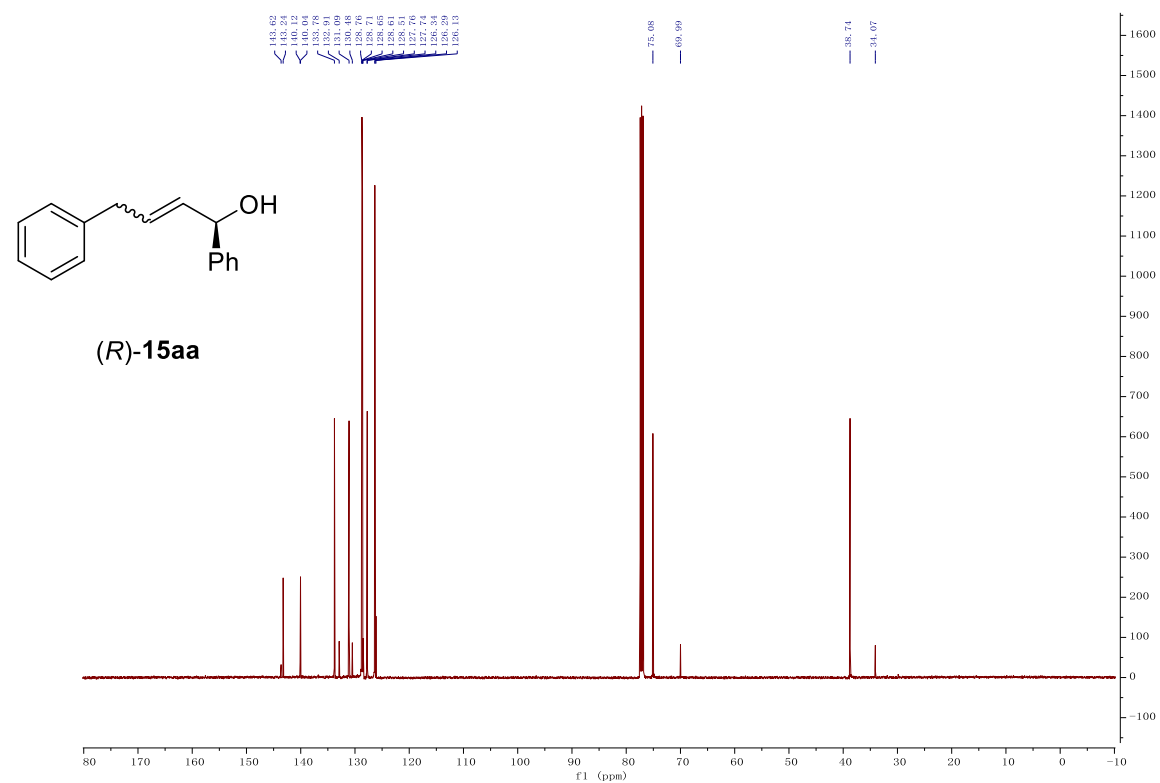

**(±)-(E)-15aa**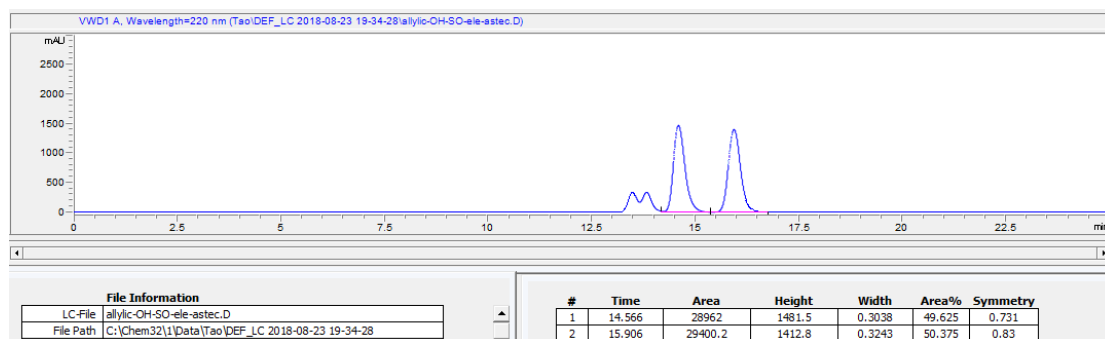**(R)-(E)-15aa**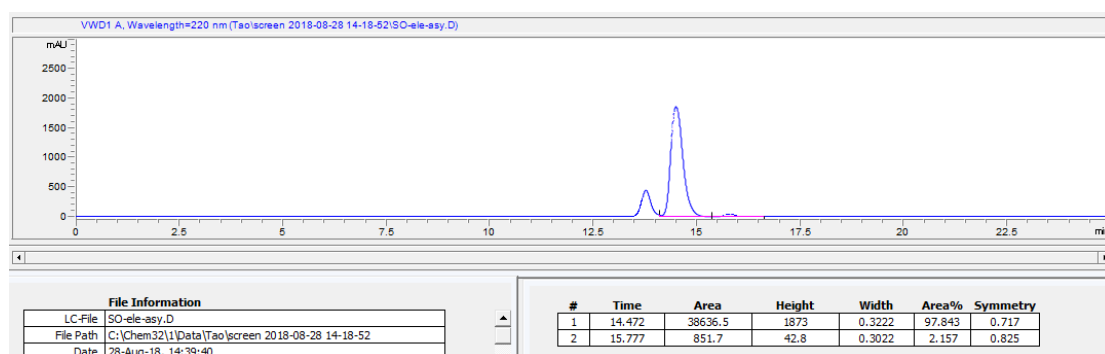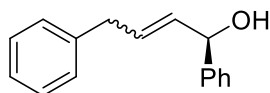**(R)-15aa**

**6aa**

COc1ccc(N[C@@H](Cc2ccccc2)Cc3ccccc3)cc1

<sup>1</sup>H NMR spectrum (CDCl<sub>3</sub>) of compound **6aa**. The x-axis represents the chemical shift in ppm (f1), ranging from 0.0 to 10.0. The y-axis represents the intensity in arbitrary units, ranging from -1000 to 9000. The spectrum shows several peaks corresponding to the protons in the molecule, with integration values provided below the peaks.

Chemical structure of **6aa** is shown, with protons labeled 1 through 19. The structure is a substituted benzamide derivative.

Key peaks and integration values:

- Peak 1 (Aromatic, ~7.3 ppm): Integration 2.01
- Peak 2 (Aromatic, ~7.2 ppm): Integration 2.04
- Peak 3 (Aromatic, ~6.8 ppm): Integration 2.02
- Peak 4 (Aromatic, ~6.5 ppm): Integration 2.00
- Peak 5 (Methine, ~4.70 ppm): Integration 0.96
- Peak 6 (Methoxy, ~3.85 ppm): Integration 1.00
- Peak 7 (Methylene, ~2.75 ppm): Integration 3.02
- Peak 8 (Methyl, ~1.85 ppm): Integration 1.00
- Peak 9 (Methyl, ~1.85 ppm): Integration 0.99
- Peak 10 (Methyl, ~1.85 ppm): Integration 1.00
- Peak 11 (Methyl, ~1.85 ppm): Integration 1.00
- Peak 12 (Methyl, ~1.85 ppm): Integration 1.00
- Peak 13 (Methyl, ~1.85 ppm): Integration 1.00
- Peak 14 (Methyl, ~1.85 ppm): Integration 1.00
- Peak 15 (Methyl, ~1.85 ppm): Integration 1.00
- Peak 16 (Methyl, ~1.85 ppm): Integration 1.00
- Peak 17 (Methyl, ~1.85 ppm): Integration 1.00
- Peak 18 (Methyl, ~1.85 ppm): Integration 1.00
- Peak 19 (Methyl, ~1.85 ppm): Integration 1.00

**(S,S)-16aa**

Chemical structure of (S,S)-16aa is shown, with atoms numbered 1 through 21. The structure features two chiral centers (1 and 2) and two 4-methoxyphenyl groups (9-12 and 15-18) and two 4-phenylbutyl chains (19-21 and 13-16).

<sup>1</sup>H NMR spectrum (CDCl<sub>3</sub>) of (S,S)-16aa. The x-axis represents the chemical shift in ppm (f1), ranging from -10 to 230. The y-axis represents the intensity, ranging from -100 to 1600. The spectrum shows several peaks corresponding to the protons in the molecule, with the following chemical shifts (ppm) labeled above the peaks:

- 7.82, 7.81, 7.80, 7.79, 7.78, 7.77, 7.76, 7.75, 7.74, 7.73, 7.72, 7.71, 7.70, 7.69, 7.68, 7.67, 7.66, 7.65, 7.64, 7.63, 7.62, 7.61, 7.60, 7.59, 7.58, 7.57, 7.56, 7.55, 7.54, 7.53, 7.52, 7.51, 7.50, 7.49, 7.48, 7.47, 7.46, 7.45, 7.44, 7.43, 7.42, 7.41, 7.40, 7.39, 7.38, 7.37, 7.36, 7.35, 7.34, 7.33, 7.32, 7.31, 7.30, 7.29, 7.28, 7.27, 7.26, 7.25, 7.24, 7.23, 7.22, 7.21, 7.20, 7.19, 7.18, 7.17, 7.16, 7.15, 7.14, 7.13, 7.12, 7.11, 7.10, 7.09, 7.08, 7.07, 7.06, 7.05, 7.04, 7.03, 7.02, 7.01, 7.00, 6.99, 6.98, 6.97, 6.96, 6.95, 6.94, 6.93, 6.92, 6.91, 6.90, 6.89, 6.88, 6.87, 6.86, 6.85, 6.84, 6.83, 6.82, 6.81, 6.80, 6.79, 6.78, 6.77, 6.76, 6.75, 6.74, 6.73, 6.72, 6.71, 6.70, 6.69, 6.68, 6.67, 6.66, 6.65, 6.64, 6.63, 6.62, 6.61, 6.60, 6.59, 6.58, 6.57, 6.56, 6.55, 6.54, 6.53, 6.52, 6.51, 6.50, 6.49, 6.48, 6.47, 6.46, 6.45, 6.44, 6.43, 6.42, 6.41, 6.40, 6.39, 6.38, 6.37, 6.36, 6.35, 6.34, 6.33, 6.32, 6.31, 6.30, 6.29, 6.28, 6.27, 6.26, 6.25, 6.24, 6.23, 6.22, 6.21, 6.20, 6.19, 6.18, 6.17, 6.16, 6.15, 6.14, 6.13, 6.12, 6.11, 6.10, 6.09, 6.08, 6.07, 6.06, 6.05, 6.04, 6.03, 6.02, 6.01, 6.00, 5.99, 5.98, 5.97, 5.96, 5.95, 5.94, 5.93, 5.92, 5.91, 5.90, 5.89, 5.88, 5.87, 5.86, 5.85, 5.84, 5.83, 5.82, 5.81, 5.80, 5.79, 5.78, 5.77, 5.76, 5.75, 5.74, 5.73, 5.72, 5.71, 5.70, 5.69, 5.68, 5.67, 5.66, 5.65, 5.64, 5.63, 5.62, 5.61, 5.60, 5.59, 5.58, 5.57, 5.56, 5.55, 5.54, 5.53, 5.52, 5.51, 5.50, 5.49, 5.48, 5.47, 5.46, 5.45, 5.44, 5.43, 5.42, 5.41, 5.40, 5.39, 5.38, 5.37, 5.36, 5.35, 5.34, 5.33, 5.32, 5.31, 5.30, 5.29, 5.28, 5.27, 5.26, 5.25, 5.24, 5.23, 5.22, 5.21, 5.20, 5.19, 5.18, 5.17, 5.16, 5.15, 5.14, 5.13, 5.12, 5.11, 5.10, 5.09, 5.08, 5.07, 5.06, 5.05, 5.04, 5.03, 5.02, 5.01, 5.00, 4.99, 4.98, 4.97, 4.96, 4.95, 4.94, 4.93, 4.92, 4.91, 4.90, 4.89, 4.88, 4.87, 4.86, 4.85, 4.84, 4.83, 4.82, 4.81, 4.80, 4.79, 4.78, 4.77, 4.76, 4.75, 4.74, 4.73, 4.72, 4.71, 4.70, 4.69, 4.68, 4.67, 4.66, 4.65, 4.64, 4.63, 4.62, 4.61, 4.60, 4.59, 4.58, 4.57, 4.56, 4.55, 4.54, 4.53, 4.52, 4.51, 4.50, 4.49, 4.48, 4.47, 4.46, 4.45, 4.44, 4.43, 4.42, 4.41, 4.40, 4.39, 4.38, 4.37, 4.36, 4.35, 4.34, 4.33, 4.32, 4.31, 4.30, 4.29, 4.28, 4.27, 4.26, 4.25, 4.24, 4.23, 4.22, 4.21, 4.20, 4.19, 4.18, 4.17, 4.16, 4.15, 4.14, 4.13, 4.12, 4.11, 4.10, 4.09, 4.08, 4.07, 4.06, 4.05, 4.04, 4.03, 4.02, 4.01, 4.00, 3.99, 3.98, 3.97, 3.96, 3.95, 3.94, 3.93, 3.92, 3.91, 3.90, 3.89, 3.88, 3.87, 3.86, 3.85, 3.84, 3.83, 3.82, 3.81, 3.80, 3.79, 3.78, 3.77, 3.76, 3.75, 3.74, 3.73, 3.72, 3.71, 3.70, 3.69, 3.68, 3.67, 3.66, 3.65, 3.64, 3.63, 3.62, 3.61, 3.60, 3.59, 3.58, 3.57, 3.56, 3.55, 3.54, 3.53, 3.52, 3.51, 3.50, 3.49, 3.48, 3.47, 3.46, 3.45, 3.44, 3.43, 3.42, 3.41, 3.40, 3.39, 3.38, 3.37, 3.36, 3.35, 3.34, 3.33, 3.32, 3.31, 3.30, 3.29, 3.28, 3.27, 3.26, 3.25, 3.24, 3.23, 3.22, 3.21, 3.20, 3.19, 3.18, 3.17, 3.16, 3.15, 3.14, 3.13, 3.12, 3.11, 3.10, 3.09, 3.08, 3.07, 3.06, 3.05, 3.04, 3.03, 3.02, 3.01, 3.00, 2.99, 2.98, 2.97, 2.96, 2.95, 2.94, 2.93, 2.92, 2.91, 2.90, 2.89, 2.88, 2.87, 2.86, 2.85, 2.84, 2.83, 2.82, 2.81, 2.80, 2.79, 2.78, 2.77, 2.76, 2.75, 2.74, 2.73, 2.72, 2.71, 2.70, 2.69, 2.68, 2.67, 2.66, 2.65, 2.64, 2.63, 2.62, 2.61, 2.60, 2.59, 2.58, 2.57, 2.56, 2.55, 2.54, 2.53, 2.52, 2.51, 2.50, 2.49, 2.48, 2.47, 2.46, 2.45, 2.44, 2.43, 2.42, 2.41, 2.40, 2.39, 2.38, 2.37, 2.36, 2.35, 2.34, 2.33, 2.32, 2.31, 2.30, 2.29, 2.28, 2.27, 2.26, 2.25, 2.24, 2.23, 2.22, 2.21, 2.20, 2.19, 2.18, 2.17, 2.16, 2.15, 2.14, 2.13, 2.12, 2.11, 2.10, 2.09, 2.08, 2.07, 2.06, 2.05, 2.04, 2.03, 2.02, 2.01, 2.00, 1.99, 1.98, 1.97, 1.96, 1.95, 1.94, 1.93, 1.92, 1.91, 1.90, 1.89, 1.88, 1.87, 1.86, 1.85, 1.84, 1.83, 1.82, 1.81, 1.80, 1.79, 1.78, 1.77, 1.76, 1.75, 1.74, 1.73, 1.72, 1.71, 1.70, 1.69, 1.68, 1.67, 1.66, 1.65, 1.64, 1.63, 1.62, 1.61, 1.60, 1.59, 1.58, 1.57, 1.56, 1.55, 1.54, 1.53, 1.5

**(±)-16aa**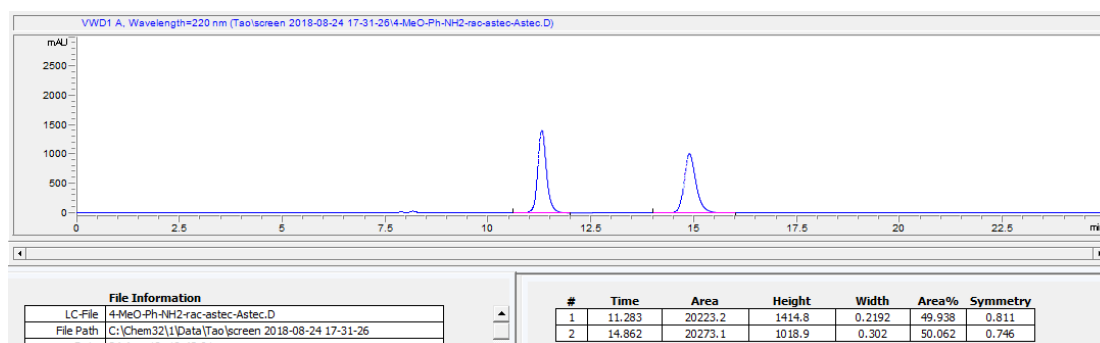**(1*S*,2*S*)-(-)-16aa**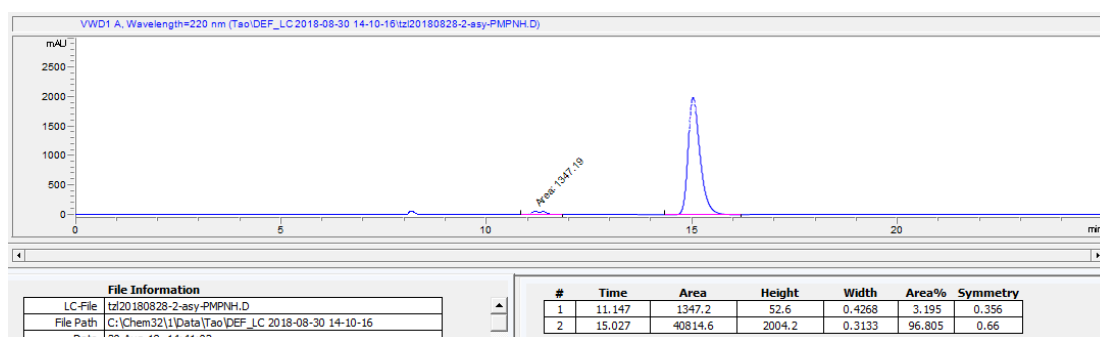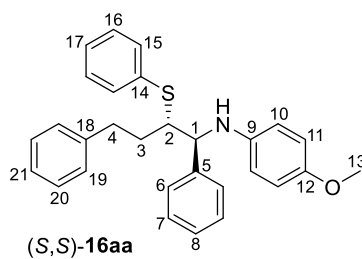

**X-Ray data for (S,S)-6ai.** Crystal data and structure refinement.

|                                   |                                                   |          |
|-----------------------------------|---------------------------------------------------|----------|
| Identification code               | CCDC 1866767                                      |          |
| Empirical formula                 | C <sub>30</sub> H <sub>37</sub> BO <sub>2</sub> S |          |
| Formula weight                    | 472.52                                            |          |
| Temperature                       | 100 K                                             |          |
| Wavelength                        | 0.71073 Å                                         |          |
| Crystal system                    | Orthorhombic                                      |          |
| Space group                       | P2 <sub>1</sub> 2 <sub>1</sub> 2 <sub>1</sub>     |          |
| Unit cell dimensions              | a = 9.5200(2) Å                                   | ∠ = 90°. |
|                                   | b = 13.4283(4) Å                                  | ∠ = 90°. |
|                                   | c = 20.6016(6) Å                                  | ∠ = 90°. |
| Volume                            | 2633.66 (12) Å <sup>3</sup>                       |          |
| Z                                 | 4                                                 |          |
| Density (calculated)              | 1.192 Mg/m <sup>3</sup>                           |          |
| Absorption coefficient            | 0.613 mm <sup>-1</sup>                            |          |
| F(000)                            | 1016                                              |          |
| Crystal size                      | 0.51 x 0.37 x 0.26 mm                             |          |
| Theta range for data collection   | 2.36 to 28.30°.                                   |          |
| Index ranges                      | -12 ≤ h ≤ 12, -17 ≤ k ≤ 17, -27 ≤ l ≤ 27          |          |
| Reflections collected             | 49428                                             |          |
| Independent reflections           | 6522 [R(int) = 0.044]                             |          |
| Completeness to theta = 28.3°     | 99.8 %                                            |          |
| Absorption correction             | Integration                                       |          |
| Max. and min. transmission        | 0.746 and 0.700                                   |          |
| Refinement method                 | Full-matrix least-squares on F <sup>2</sup>       |          |
| Data / restraints / parameters    | 6522 / 0 / 314                                    |          |
| Goodness-of-fit on F <sup>2</sup> | 0.995                                             |          |
| Final R indices [I > 2σ(I)]       | R1 = 0.0306, wR2 = 0.0733                         |          |
| Largest diff. peak and hole       | 0.2864 and -0.1977 e.Å <sup>-3</sup>              |          |

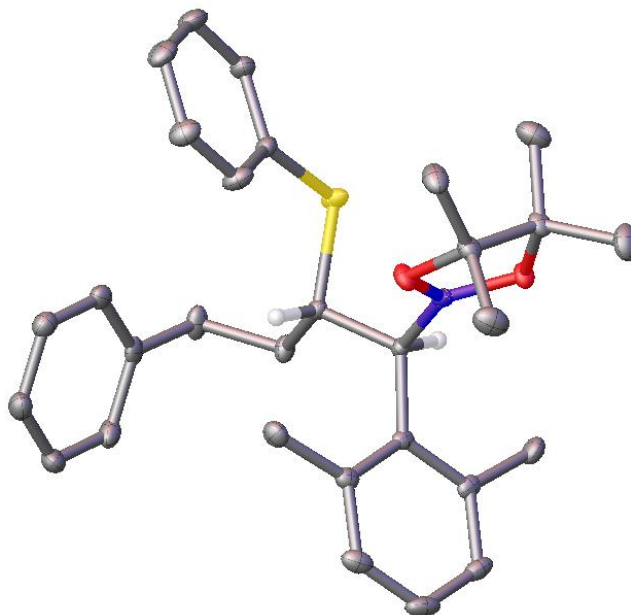

**Figure 1.** X-ray structure of complex (*S,S*)-**6ai**.

The crystals were obtained directly from recrystallization as yellow needles 0.51 x 0.37 x 0.26 mm in size and mounted using oil (Paratone-N, Exxon) to a thin glass fiber with the (1 0 0) scattering planes roughly normal to the spindle axis. Systematic absences for (*S,S*)-**6ai** were consistent with the space group  $P2_12_12_1$ . Unit cell dimensions were  $a = 9.5200(2) \text{ \AA}$ ,  $b = 13.4283(4) \text{ \AA}$ ,  $c = 20.6016(6) \text{ \AA}$ ,  $\alpha = 90^\circ$ ,  $\beta = 90^\circ$ ,  $\gamma = 90^\circ$ . Integration absorption correction was applied and maximum and minimum transmission factors were 0.746 and 0.700. The 6522 data points were used in the full-matrix least-squares refinement. The structure was solved using charge flipping by using SHELXTL software package.<sup>51</sup> Hydrogen atoms were placed in “idealized” positions and their displacement parameters were fixed to be 20-50 % larger than those of the attached non-hydrogen atoms.

**Table 1.** Atomic coordinates ( $\times 10^4$ ) and equivalent isotropic displacement parameters ( $\text{\AA}^2 \times 10^3$ ).  $U(\text{eq})$  is defined as one third of the trace of the orthogonalized  $U^{ij}$  tensor.

*Refinement.* Omit (060), (012), (110), and (014). No restraints nor constraints

*Fractional atomic coordinates and isotropic or equivalent isotropic displacement parameters ( $\text{\AA}^2$ ) for (mo\_DD48M\_0m)*

|      | <i>x</i>     | <i>y</i>     | <i>z</i>      | $U_{\text{iso}}^*/U_{\text{eq}}$ |
|------|--------------|--------------|---------------|----------------------------------|
| S1   | 0.37901 (4)  | 0.65733 (2)  | 0.510290 (15) | 0.01819 (8)                      |
| O1   | 0.23720 (9)  | 0.50566 (7)  | 0.63213 (5)   | 0.0178 (2)                       |
| O2   | 0.26085 (9)  | 0.65401 (7)  | 0.68593 (4)   | 0.01567 (18)                     |
| C1   | 0.68061 (15) | 0.25499 (11) | 0.43328 (7)   | 0.0222 (3)                       |
| H1   | 0.67861 (15) | 0.18487 (11) | 0.42727 (7)   | 0.0267 (3)*                      |
| C2   | 0.79399 (15) | 0.29997 (12) | 0.46412 (7)   | 0.0249 (3)                       |
| H2   | 0.87002 (15) | 0.26046 (12) | 0.47923 (7)   | 0.0299 (4)*                      |
| C3   | 0.57054 (15) | 0.31367 (10) | 0.41143 (7)   | 0.0196 (3)                       |
| H3   | 0.49225 (15) | 0.28347 (10) | 0.39069 (7)   | 0.0235 (3)*                      |
| C4   | 0.79636 (14) | 0.40235 (11) | 0.47285 (6)   | 0.0223 (3)                       |
| H4   | 0.87379 (14) | 0.43219 (11) | 0.49448 (6)   | 0.0268 (4)*                      |
| C5   | 0.57389 (14) | 0.41639 (10) | 0.41964 (6)   | 0.0184 (3)                       |
| H5   | 0.49811 (14) | 0.45574 (10) | 0.40407 (6)   | 0.0221 (3)*                      |
| C6   | 0.68678 (14) | 0.46234 (10) | 0.45037 (6)   | 0.0175 (3)                       |
| C7   | 0.69006 (16) | 0.57360 (10) | 0.46128 (6)   | 0.0218 (3)                       |
| H7a  | 0.78459 (16) | 0.59923 (10) | 0.45024 (6)   | 0.0262 (3)*                      |
| H7b  | 0.62146 (16) | 0.60587 (10) | 0.43193 (6)   | 0.0262 (3)*                      |
| C8   | 0.65522 (13) | 0.60158 (10) | 0.53187 (6)   | 0.0166 (3)                       |
| H8a  | 0.72178 (13) | 0.56677 (10) | 0.56099 (6)   | 0.0199 (3)*                      |
| H8b  | 0.67005 (13) | 0.67404 (10) | 0.53747 (6)   | 0.0199 (3)*                      |
| C9   | 0.50543 (13) | 0.57613 (9)  | 0.55292 (6)   | 0.0126 (2)                       |
| H9   | 0.48508 (13) | 0.50505 (9)  | 0.54191 (6)   | 0.0151 (3)*                      |
| C10  | 0.48308 (12) | 0.59231 (9)  | 0.62662 (6)   | 0.0117 (2)                       |
| H10  | 0.50946 (12) | 0.66330 (9)  | 0.63478 (6)   | 0.0140 (3)*                      |
| C11  | 0.57330 (12) | 0.53103 (10) | 0.67380 (6)   | 0.0128 (2)                       |
| C12  | 0.58838 (12) | 0.42669 (10) | 0.66956 (6)   | 0.0151 (2)                       |
| C13  | 0.63367 (13) | 0.58072 (10) | 0.72772 (6)   | 0.0155 (2)                       |
| C14  | 0.52427 (14) | 0.36410 (9)  | 0.61617 (7)   | 0.0189 (3)                       |
| H14a | 0.5774 (7)   | 0.3738 (6)   | 0.57592 (14)  | 0.0283 (4)*                      |
| H14b | 0.5275 (10)  | 0.29369 (12) | 0.6286 (2)    | 0.0283 (4)*                      |
| H14c | 0.4264 (4)   | 0.3843 (5)   | 0.6094 (3)    | 0.0283 (4)*                      |
| C15  | 0.62111 (16) | 0.69221 (10) | 0.73714 (6)   | 0.0209 (3)                       |
| H15a | 0.6623 (10)  | 0.71082 (14) | 0.7790 (2)    | 0.0313 (4)*                      |
| H15b | 0.6711 (9)   | 0.72661 (10) | 0.7021 (3)    | 0.0313 (4)*                      |
| H15c | 0.52178 (17) | 0.71134 (15) | 0.7364 (5)    | 0.0313 (4)*                      |
| C16  | 0.66380 (13) | 0.37535 (11) | 0.71756 (7)   | 0.0203 (3)                       |
| H16  | 0.67580 (13) | 0.30536 (11) | 0.71382 (7)   | 0.0243 (3)*                      |
| C17  | 0.70548 (13) | 0.52689 (11) | 0.77508 (6)   | 0.0201 (3)                       |
| H17  | 0.74440 (13) | 0.56092 (11) | 0.81129 (6)   | 0.0241 (3)*                      |
| C18  | 0.72103 (14) | 0.42472 (12) | 0.77025 (7)   | 0.0231 (3)                       |
| H18  | 0.77048 (14) | 0.38884 (12) | 0.80276 (7)   | 0.0277 (3)*                      |
| C19  | 0.27465 (13) | 0.57724 (10) | 0.46143 (6)   | 0.0157 (2)                       |
| C20  | 0.24599 (14) | 0.47803 (11) | 0.47566 (7)   | 0.0210 (3)                       |
| H20  | 0.28421 (14) | 0.44860 (11) | 0.51369 (7)   | 0.0253 (3)*                      |

|      |               |              |              |             |
|------|---------------|--------------|--------------|-------------|
| C21  | 0.21368 (15)  | 0.61993 (10) | 0.40629 (6)  | 0.0196 (3)  |
| H21  | 0.23336 (15)  | 0.68733 (10) | 0.39561 (6)  | 0.0236 (3)* |
| C22  | 0.16154 (15)  | 0.42156 (11) | 0.43446 (7)  | 0.0233 (3)  |
| H22  | 0.14605 (15)  | 0.35308 (11) | 0.44354 (7)  | 0.0279 (3)* |
| C23  | 0.12431 (16)  | 0.56429 (11) | 0.36693 (6)  | 0.0243 (3)  |
| H23  | 0.07980 (16)  | 0.59474 (11) | 0.33074 (6)  | 0.0292 (3)* |
| C24  | 0.10009 (15)  | 0.46452 (12) | 0.38041 (7)  | 0.0246 (3)  |
| H24  | 0.04170 (15)  | 0.42596 (12) | 0.35272 (7)  | 0.0295 (4)* |
| C25  | 0.10955 (13)  | 0.51575 (10) | 0.67193 (6)  | 0.0173 (2)  |
| C26  | -0.01545 (14) | 0.48278 (11) | 0.63209 (7)  | 0.0239 (3)  |
| H26a | -0.0159 (7)   | 0.5186 (6)   | 0.5906 (2)   | 0.0359 (4)* |
| H26b | -0.0092 (6)   | 0.41101 (19) | 0.6240 (5)   | 0.0359 (4)* |
| H26c | -0.10220 (15) | 0.4974 (8)   | 0.6559 (2)   | 0.0359 (4)* |
| C27  | 0.12852 (17)  | 0.44748 (11) | 0.73029 (8)  | 0.0283 (3)  |
| H27a | 0.1454 (13)   | 0.3793 (2)   | 0.71530 (8)  | 0.0425 (5)* |
| H27b | 0.2089 (8)    | 0.4702 (6)   | 0.7561 (3)   | 0.0425 (5)* |
| H27c | 0.0435 (5)    | 0.4491 (7)   | 0.7571 (3)   | 0.0425 (5)* |
| C28  | 0.11140 (13)  | 0.62884 (9)  | 0.68967 (6)  | 0.0164 (2)  |
| C29  | 0.03659 (16)  | 0.69350 (11) | 0.63938 (8)  | 0.0271 (3)  |
| H29a | 0.0534 (10)   | 0.76393 (11) | 0.6491 (3)   | 0.0406 (5)* |
| H29b | 0.0729 (9)    | 0.6780 (6)   | 0.59602 (10) | 0.0406 (5)* |
| H29c | -0.0645 (2)   | 0.6800 (6)   | 0.6407 (4)   | 0.0406 (5)* |
| C30  | 0.05973 (16)  | 0.65390 (13) | 0.75723 (7)  | 0.0283 (3)  |
| H30a | 0.1188 (8)    | 0.6203 (7)   | 0.78943 (7)  | 0.0424 (5)* |
| H30b | 0.0646 (12)   | 0.72607 (15) | 0.7639 (2)   | 0.0424 (5)* |
| H30c | -0.0377 (4)   | 0.6316 (8)   | 0.7621 (2)   | 0.0424 (5)* |
| B1   | 0.32321 (15)  | 0.58392 (11) | 0.64725 (7)  | 0.0136 (3)  |

Atomic displacement parameters ( $\text{\AA}^2$ ) for (mo\_DD48M\_0m)

|     | $U^{11}$     | $U^{22}$     | $U^{33}$     | $U^{12}$      | $U^{13}$      | $U^{23}$     |
|-----|--------------|--------------|--------------|---------------|---------------|--------------|
| S1  | 0.02331 (15) | 0.01365 (14) | 0.01761 (14) | -0.00035 (12) | -0.00727 (12) | 0.00146 (11) |
| O1  | 0.0105 (4)   | 0.0188 (5)   | 0.0242 (5)   | -0.0003 (3)   | 0.0029 (4)    | -0.0052 (4)  |
| O2  | 0.0108 (4)   | 0.0171 (4)   | 0.0191 (4)   | -0.0016 (4)   | 0.0028 (3)    | -0.0042 (4)  |
| C1  | 0.0269 (7)   | 0.0200 (7)   | 0.0198 (6)   | 0.0034 (5)    | 0.0012 (6)    | -0.0025 (5)  |
| C2  | 0.0218 (7)   | 0.0299 (7)   | 0.0231 (7)   | 0.0105 (6)    | -0.0033 (6)   | -0.0061 (6)  |
| C3  | 0.0199 (6)   | 0.0234 (7)   | 0.0155 (6)   | -0.0015 (5)   | 0.0001 (5)    | -0.0004 (5)  |
| C4  | 0.0172 (6)   | 0.0312 (8)   | 0.0186 (6)   | -0.0005 (5)   | 0.0016 (5)    | -0.0087 (5)  |
| C5  | 0.0194 (6)   | 0.0227 (7)   | 0.0131 (6)   | 0.0031 (5)    | 0.0025 (5)    | 0.0012 (5)   |
| C6  | 0.0217 (6)   | 0.0200 (7)   | 0.0109 (5)   | -0.0007 (5)   | 0.0069 (5)    | -0.0017 (5)  |
| C7  | 0.0298 (7)   | 0.0196 (7)   | 0.0161 (6)   | -0.0054 (6)   | 0.0092 (5)    | -0.0018 (5)  |
| C8  | 0.0171 (6)   | 0.0178 (6)   | 0.0148 (6)   | -0.0039 (5)   | 0.0038 (5)    | -0.0031 (5)  |
| C9  | 0.0140 (5)   | 0.0124 (6)   | 0.0113 (5)   | 0.0000 (4)    | -0.0007 (4)   | 0.0003 (4)   |
| C10 | 0.0117 (5)   | 0.0126 (5)   | 0.0108 (5)   | -0.0003 (4)   | -0.0008 (4)   | -0.0011 (4)  |
| C11 | 0.0082 (5)   | 0.0186 (6)   | 0.0117 (5)   | -0.0003 (4)   | 0.0016 (4)    | 0.0019 (5)   |
| C12 | 0.0113 (5)   | 0.0178 (6)   | 0.0162 (6)   | -0.0002 (4)   | 0.0025 (4)    | 0.0028 (5)   |
| C13 | 0.0108 (5)   | 0.0239 (6)   | 0.0117 (5)   | -0.0028 (5)   | 0.0028 (4)    | 0.0012 (5)   |
| C14 | 0.0207 (6)   | 0.0129 (6)   | 0.0230 (6)   | 0.0008 (5)    | 0.0008 (5)    | 0.0004 (5)   |
| C15 | 0.0214 (6)   | 0.0257 (7)   | 0.0156 (6)   | -0.0025 (6)   | -0.0027 (5)   | -0.0056 (5)  |
| C16 | 0.0147 (6)   | 0.0206 (7)   | 0.0254 (7)   | 0.0006 (5)    | 0.0025 (5)    | 0.0090 (5)   |
| C17 | 0.0134 (6)   | 0.0343 (8)   | 0.0126 (6)   | -0.0043 (5)   | -0.0013 (5)   | 0.0032 (5)   |
| C18 | 0.0144 (6)   | 0.0345 (8)   | 0.0204 (6)   | 0.0011 (6)    | -0.0013 (5)   | 0.0131 (6)   |

|     |            |            |            |             |             |             |
|-----|------------|------------|------------|-------------|-------------|-------------|
| C19 | 0.0141 (5) | 0.0196 (6) | 0.0133 (5) | 0.0003 (5)  | −0.0017 (5) | −0.0021 (5) |
| C20 | 0.0211 (6) | 0.0236 (7) | 0.0184 (6) | −0.0056 (5) | −0.0069 (5) | 0.0038 (5)  |
| C21 | 0.0218 (6) | 0.0207 (6) | 0.0163 (6) | 0.0035 (5)  | −0.0024 (5) | 0.0011 (5)  |
| C22 | 0.0223 (7) | 0.0236 (7) | 0.0238 (7) | −0.0073 (5) | −0.0057 (5) | 0.0023 (6)  |
| C23 | 0.0245 (7) | 0.0323 (8) | 0.0162 (6) | 0.0021 (6)  | −0.0067 (6) | 0.0021 (5)  |
| C24 | 0.0200 (7) | 0.0346 (8) | 0.0192 (6) | −0.0056 (6) | −0.0057 (5) | −0.0030 (6) |
| C25 | 0.0122 (5) | 0.0184 (6) | 0.0213 (6) | 0.0000 (5)  | 0.0023 (5)  | −0.0015 (5) |
| C26 | 0.0137 (6) | 0.0262 (7) | 0.0319 (8) | −0.0025 (5) | 0.0006 (5)  | −0.0090 (6) |
| C27 | 0.0247 (7) | 0.0276 (7) | 0.0327 (8) | 0.0005 (6)  | 0.0035 (6)  | 0.0108 (6)  |
| C28 | 0.0100 (5) | 0.0181 (6) | 0.0212 (6) | −0.0010 (5) | 0.0033 (5)  | −0.0022 (5) |
| C29 | 0.0209 (7) | 0.0227 (7) | 0.0376 (8) | 0.0038 (6)  | 0.0001 (6)  | 0.0057 (6)  |
| C30 | 0.0226 (7) | 0.0332 (8) | 0.0290 (7) | −0.0040 (6) | 0.0092 (6)  | −0.0089 (7) |
| B1  | 0.0131 (6) | 0.0150 (6) | 0.0127 (6) | 0.0010 (5)  | −0.0021 (5) | 0.0014 (5)  |

*Geometric parameters (Å, °) for (mo\_DD48M\_0m)*

|          |             |          |             |
|----------|-------------|----------|-------------|
| S1—C9    | 1.8462 (12) | C14—H14c | 0.9800      |
| S1—C19   | 1.7767 (13) | C15—H15a | 0.9800      |
| O1—C25   | 1.4722 (15) | C15—H15b | 0.9800      |
| O1—B1    | 1.3681 (17) | C15—H15c | 0.9800      |
| O2—C28   | 1.4644 (15) | C16—H16  | 0.9500      |
| O2—B1    | 1.3687 (16) | C16—C18  | 1.384 (2)   |
| C1—H1    | 0.9500      | C17—H17  | 0.9500      |
| C1—C2    | 1.390 (2)   | C17—C18  | 1.384 (2)   |
| C1—C3    | 1.3863 (19) | C18—H18  | 0.9500      |
| C2—H2    | 0.9500      | C19—C20  | 1.3911 (19) |
| C2—C4    | 1.387 (2)   | C19—C21  | 1.3986 (17) |
| C3—H3    | 0.9500      | C20—H20  | 0.9500      |
| C3—C5    | 1.3900 (19) | C20—C22  | 1.3934 (19) |
| C4—H4    | 0.9500      | C21—H21  | 0.9500      |
| C4—C6    | 1.397 (2)   | C21—C23  | 1.3927 (19) |
| C5—H5    | 0.9500      | C22—H22  | 0.9500      |
| C5—C6    | 1.3916 (19) | C22—C24  | 1.384 (2)   |
| C6—C7    | 1.5111 (18) | C23—H23  | 0.9500      |
| C7—H7a   | 0.9900      | C23—C24  | 1.388 (2)   |
| C7—H7b   | 0.9900      | C24—H24  | 0.9500      |
| C7—C8    | 1.5381 (17) | C25—C26  | 1.5120 (18) |
| C8—H8a   | 0.9900      | C25—C27  | 1.5227 (19) |
| C8—H8b   | 0.9900      | C25—C28  | 1.5620 (18) |
| C8—C9    | 1.5291 (16) | C26—H26a | 0.9800      |
| C9—H9    | 1.0000      | C26—H26b | 0.9800      |
| C9—C10   | 1.5486 (16) | C26—H26c | 0.9800      |
| C10—H10  | 1.0000      | C27—H27a | 0.9800      |
| C10—C11  | 1.5360 (16) | C27—H27b | 0.9800      |
| C10—B1   | 1.5842 (18) | C27—H27c | 0.9800      |
| C11—C12  | 1.4111 (17) | C28—C29  | 1.5279 (19) |
| C11—C13  | 1.4176 (17) | C28—C30  | 1.5141 (19) |
| C12—C14  | 1.5128 (18) | C29—H29a | 0.9800      |
| C12—C16  | 1.4031 (18) | C29—H29b | 0.9800      |
| C13—C15  | 1.5143 (19) | C29—H29c | 0.9800      |
| C13—C17  | 1.3935 (18) | C30—H30a | 0.9800      |
| C14—H14a | 0.9800      | C30—H30b | 0.9800      |
| C14—H14b | 0.9800      | C30—H30c | 0.9800      |

|             |             |               |             |
|-------------|-------------|---------------|-------------|
| C19—S1—C9   | 106.05 (6)  | H16—C16—C12   | 119.37 (8)  |
| B1—O1—C25   | 107.25 (10) | C18—C16—C12   | 121.26 (13) |
| B1—O2—C28   | 107.06 (10) | C18—C16—H16   | 119.37 (8)  |
| C2—C1—H1    | 120.39 (8)  | H17—C17—C13   | 119.45 (8)  |
| C3—C1—H1    | 120.39 (8)  | C18—C17—C13   | 121.09 (13) |
| C3—C1—C2    | 119.23 (13) | C18—C17—H17   | 119.45 (8)  |
| H2—C2—C1    | 119.91 (8)  | C17—C18—C16   | 119.31 (12) |
| C4—C2—C1    | 120.17 (13) | H18—C18—C16   | 120.35 (8)  |
| C4—C2—H2    | 119.91 (9)  | H18—C18—C17   | 120.35 (8)  |
| H3—C3—C1    | 119.76 (8)  | C20—C19—S1    | 124.75 (10) |
| C5—C3—C1    | 120.47 (13) | C21—C19—S1    | 116.36 (10) |
| C5—C3—H3    | 119.76 (8)  | C21—C19—C20   | 118.84 (12) |
| H4—C4—C2    | 119.45 (9)  | H20—C20—C19   | 119.80 (7)  |
| C6—C4—C2    | 121.10 (13) | C22—C20—C19   | 120.39 (13) |
| C6—C4—H4    | 119.45 (8)  | C22—C20—H20   | 119.80 (8)  |
| H5—C5—C3    | 119.56 (8)  | H21—C21—C19   | 119.78 (8)  |
| C6—C5—C3    | 120.87 (13) | C23—C21—C19   | 120.43 (13) |
| C6—C5—H5    | 119.56 (8)  | C23—C21—H21   | 119.78 (8)  |
| C5—C6—C4    | 118.15 (12) | H22—C22—C20   | 119.76 (8)  |
| C7—C6—C4    | 120.36 (13) | C24—C22—C20   | 120.48 (14) |
| C7—C6—C5    | 121.47 (13) | C24—C22—H22   | 119.76 (9)  |
| H7a—C7—C6   | 109.17 (7)  | H23—C23—C21   | 119.90 (8)  |
| H7b—C7—C6   | 109.17 (8)  | C24—C23—C21   | 120.20 (12) |
| H7b—C7—H7a  | 107.9       | C24—C23—H23   | 119.90 (8)  |
| C8—C7—C6    | 112.19 (11) | C23—C24—C22   | 119.56 (13) |
| C8—C7—H7a   | 109.17 (7)  | H24—C24—C22   | 120.22 (9)  |
| C8—C7—H7b   | 109.17 (8)  | H24—C24—C23   | 120.22 (8)  |
| H8a—C8—C7   | 108.64 (8)  | C26—C25—O1    | 108.69 (10) |
| H8b—C8—C7   | 108.64 (7)  | C27—C25—O1    | 106.64 (10) |
| H8b—C8—H8a  | 107.6       | C27—C25—C26   | 110.22 (12) |
| C9—C8—C7    | 114.49 (11) | C28—C25—O1    | 102.16 (10) |
| C9—C8—H8a   | 108.64 (7)  | C28—C25—C26   | 114.87 (11) |
| C9—C8—H8b   | 108.64 (7)  | C28—C25—C27   | 113.53 (11) |
| C8—C9—S1    | 109.94 (8)  | H26a—C26—C25  | 109.5       |
| H9—C9—S1    | 109.25 (4)  | H26b—C26—C25  | 109.5       |
| H9—C9—C8    | 109.25 (7)  | H26b—C26—H26a | 109.5       |
| C10—C9—S1   | 107.10 (8)  | H26c—C26—C25  | 109.5       |
| C10—C9—C8   | 112.01 (10) | H26c—C26—H26a | 109.5       |
| C10—C9—H9   | 109.25 (6)  | H26c—C26—H26b | 109.5       |
| H10—C10—C9  | 105.31 (6)  | H27a—C27—C25  | 109.5       |
| C11—C10—C9  | 117.94 (10) | H27b—C27—C25  | 109.5       |
| C11—C10—H10 | 105.31 (6)  | H27b—C27—H27a | 109.5       |
| B1—C10—C9   | 112.64 (10) | H27c—C27—C25  | 109.5       |
| B1—C10—H10  | 105.31 (7)  | H27c—C27—H27a | 109.5       |
| B1—C10—C11  | 109.23 (9)  | H27c—C27—H27b | 109.5       |
| C12—C11—C10 | 123.34 (11) | C25—C28—O2    | 102.89 (10) |
| C13—C11—C10 | 118.06 (11) | C29—C28—O2    | 106.62 (10) |
| C13—C11—C12 | 118.34 (11) | C29—C28—C25   | 112.87 (11) |
| C14—C12—C11 | 123.75 (11) | C30—C28—O2    | 108.22 (11) |
| C16—C12—C11 | 119.75 (12) | C30—C28—C25   | 115.31 (11) |
| C16—C12—C14 | 116.48 (12) | C30—C28—C29   | 110.22 (12) |
| C15—C13—C11 | 122.26 (12) | H29a—C29—C28  | 109.5       |
| C17—C13—C11 | 120.22 (12) | H29b—C29—C28  | 109.5       |
| C17—C13—C15 | 117.50 (12) | H29b—C29—H29a | 109.5       |

|               |       |               |            |
|---------------|-------|---------------|------------|
| H14a—C14—C12  | 109.5 | H29c—C29—C28  | 109.5      |
| H14b—C14—C12  | 109.5 | H29c—C29—H29a | 109.5      |
| H14b—C14—H14a | 109.5 | H29c—C29—H29b | 109.5      |
| H14c—C14—C12  | 109.5 | H30a—C30—C28  | 109.5      |
| H14c—C14—H14a | 109.5 | H30b—C30—C28  | 109.5      |
| H14c—C14—H14b | 109.5 | H30b—C30—H30a | 109.5      |
| H15a—C15—C13  | 109.5 | H30c—C30—C28  | 109.5      |
| H15b—C15—C13  | 109.5 | H30c—C30—H30a | 109.5      |
| H15b—C15—H15a | 109.5 | H30c—C30—H30b | 109.5      |
| H15c—C15—C13  | 109.5 | O2—B1—O1      | 113.65(11) |
| H15c—C15—H15a | 109.5 | C10—B1—O1     | 124.65(11) |
| H15c—C15—H15b | 109.5 | C10—B1—O2     | 121.60(11) |

---

## References

- (1) Gilman, H.; Cartledge, F. K. *J. Organomet. Chem.* **1964**, 2 (6), 447-454.
- (2) Whitesides, G. M.; Casey, C. P.; Krieger, J. K. *J. Am. Chem. Soc.* **1971**, 93 (6), 1379-1389.
- (3) Aggarwal, V. K.; Gültekin, Z.; S. Grainger, R.; Adams, H.; L. Spargo, P. *J. Chem. Soc., Perkin Trans. I* **1998**, (17), 2771-2782.
- (4) Coombs, J. R.; Zhang, L.; Morken, J. P. *J. Am. Chem. Soc.* **2014**, 136 (46), 16140-16143.
- (5) Armstrong, R. J.; Sandford, C.; García-Ruiz, C.; Aggarwal, V. K. *Chem. Commun.* **2017**, 53 (36), 4922-4925.
- (6) Tucker, C. E.; Davidson, J.; Knochel, P. *J. Org. Chem.* **1992**, 57 (12), 3482-3485.
- (7) Yoon, C. H.; Yoo, K. S.; Yi, S. W.; Mishra, R. K.; Jung, K. W. *Org. Lett.* **2004**, 6 (22), 4037-4039.
- (8) Morrill, C.; Grubbs, R. H. *J. Org. Chem.* **2003**, 68 (15), 6031-6034.
- (9) Yoshida, H.; Kageyuki, I.; Takaki, K. *Org. Lett.* **2014**, 16 (13), 3512-3515.
- (10) Kuş, M.; Artok, L.; Aygün, M. *J. Org. Chem.* **2015**, 80 (11), 5494-5506.
- (11) García-Ruiz, C.; Chen, J. L. Y.; Sandford, C.; Feeney, K.; Lorenzo, P.; Berionni, G.; Mayr, H.; Aggarwal, V. K. *J. Am. Chem. Soc.* **2017**, 139 (43), 15324-15327.
- (12) Mun, B.; Kim, S.; Yoon, H.; Kim, K. H.; Lee, Y. *J. Org. Chem.* **2017**, 82 (12), 6349-6357.
- (13) Ohmura, T.; Yamamoto, Y.; Miyaura, N. *J. Am. Chem. Soc.* **2000**, 122 (20), 4990-4991.
- (14) Obligation, J. V.; Neely, J. M.; Yazdani, A. N.; Pappas, I.; Chirik, P. J. *J. Am. Chem. Soc.* **2015**, 137 (18), 5855-5858.
- (15) Tan, P. W.; Haughey, M.; Dixon, D. J. *Chem. Commun.* **2015**, 51 (21), 4406-4409.
- (16) Prieto, M.; Mayor, S.; Lloyd-Williams, P.; Giralt, E. *J. Org. Chem.* **2009**, 74 (23), 9202-9205.
- (17) Del Grosso, A.; Ayuso Carrillo, J.; Ingleson, M. J. *Chem. Commun.* **2015**, 51 (14), 2878-2881.
- (18) Armstrong, R. J.; García-Ruiz, C.; Myers, E. L.; Aggarwal, V. K. *Angew. Chem. Int. Ed.* **2017**, 56 (3), 786-790.
- (19) Denmark, S. E.; Rossi, S.; Webster, M. P.; Wang, H. *J. Am. Chem. Soc.* **2014**, 136 (37), 13016-13028.
- (20) Klose, J.; Reese, C. B.; Song, Q. *Tetrahedron* **1997**, 53 (42), 14411-14416.
- (21) Denmark, S. E.; Chi, H. M. *J. Am. Chem. Soc.* **2014**, 136 (25), 8915-8918.
- (22) Wang, T.; Kohrt, S.; Daniliuc, C. G.; Kehr, G.; Erker, G. *Org. Biomol. Chem.* **2017**, 15

- (29), 6223-6232.
- (23) Boto, A.; Hernández, D.; Hernández, R. *Eur. J. Org. Chem.* **2010**, 2010 (20), 3847-3857.
- (24) Barrett, A. G. M.; Dhanak, D.; Graboski, G. G.; Taylor, S. J. *Org. Synth.* **1990**, 68, 8-13.
- (25) Kotani, S.; Kukita, K.; Tanaka, K.; Ichibakase, T.; Nakajima, M. *J. Org. Chem.* **2014**, 79 (11), 4817-4825.
- (26) Witten, M. R.; Jacobsen, E. N. *Org. Lett.* **2015**, 17 (11), 2772-2775.
- (27) Du, Z.; Kawatani, T.; Kataoka, K.; Omatsu, R.; Nokami, J. *Tetrahedron* **2012**, 68 (11), 2471-2480.
- (28) Teruaki, M.; Yoji, S.; Masatoshi, A. *Chem. Lett.* **1979**, 8 (6), 705-708.
- (29) Kitagawa, O.; Momose, S.-i.; Fushimi, Y.; Taguchi, T. *Tetrahedron Lett.* **1999**, 40 (50), 8827-8831.
- (30) Teruaki, M.; Yoji, S.; Masatoshi, A. *Chem. Lett.* **1978**, 7 (11), 1253-1256.
- (31) Ukaji, Y.; Yamamoto, K.; Fukui, M.; Fujisawa, T. *Tetrahedron Lett.* **1991**, 32 (25), 2919-2922.
- (32) Johnson, C. R.; Schroeck, C. W.; Shanklin, J. R. *J. Am. Chem. Soc.* **1973**, 95 (22), 7424-7431.
- (33) Joseph, R.; Masson, E. *Supramol. Chem.* **2014**, 26 (9), 632-641.
- (34) Fujisawa, T.; Takemura, I.; Ukaji, Y. *Tetrahedron Lett.* **1990**, 31 (38), 5479-5482.
- (35) Capriati, V.; Florio, S.; Luisi, R. *Org. Lett.* **2002**, 4 (14), 2445-2448.
- (36) Archelas, A.; Furstoss, R. *J. Org. Chem.* **1999**, 64 (16), 6112-6114.
- (37) Kim, J.-H.; Yang, H.; Park, J.; Boons, G.-J. *J. Am. Chem. Soc.* **2005**, 127 (34), 12090-12097.
- (38) Nishide, K.; Shigeta, Y.; Obata, K.; Inoue, T.; Node, M. *Tetrahedron Lett.* **1996**, 37 (13), 2271-2274.
- (39) Node, M.; Nishide, K.; Shigeta, Y.; Obata, K.; Shiraki, H.; Kunishige, H. *Tetrahedron* **1997**, 53 (38), 12883-12894.
- (40) Toshimitsu, A.; Hirosawa, C.; Tamao, K. *Tetrahedron* **1994**, 50 (30), 8997-9008.
- (41) Cho, B. T.; Choi, O. K.; Kim, D. J. *Tetrahedron: Asym.* **2002**, 13 (7), 697-703.
- (42) Christoffers, J.; Rößler, U. *Tetrahedron: Asym.* **1998**, 9 (13), 2349-2357.
- (43) Christoffers, J.; Rößler, U. *Tetrahedron: Asym.* **1999**, 10 (6), 1207-1215.
- (44) Lovinger, G. J.; Morken, J. P. *J. Am. Chem. Soc.* **2017**, 139 (48), 17293-17296.

- (45) Pinna, G.; Bellucci, M. C.; Malpezzi, L.; Pisani, L.; Superchi, S.; Volonterio, A.; Zanda, M. *Tetrahedron* **2011**, *67* (29), 5268-5281.
- (46) Blakemore, P. R.; Burge, M. S. *J. Am. Chem. Soc.* **2007**, *129* (11), 3068-3069.
- (47) Ema, T.; Ura, N.; Yoshii, M.; Korenaga, T.; Sakai, T. *Tetrahedron* **2009**, *65* (46), 9583-9591.
- (48) Blakemore, P. R.; Marsden, S. P.; Vater, H. D. *Org. Lett.* **2006**, *8* (4), 773-776.
- (49) Alwedi, E.; Zakharov, L. N.; Blakemore, P. R. *Eur. J. Org. Chem.* **2014**, *2014* (30), 6643-6648.
- (50) Tueting, D. R.; Echavarren, A. M.; Stille, J. K. *Tetrahedron* **1989**, *45* (4), 979-992.
- (51) Sheldrick, G. M. SHELX-97, University of Gottingen, Gottingen, Germany, 1997.
